# Supplementary material
Source: publisher figshare collection journal article supplement (https://frontiersin.figshare.com/ndownloader/files/18024128)
Supplement: Supplementary file 1 [file 18024128]

## Sheet: Statistics
Bin	Taxonomy	Total Size	Num Contigs	N50	GC Content	Complition	Redundancy	Taxon call occurrence
Bin_2	Candidatus Cloacimonas acidaminovorans	1.41 Mb	153	11,168	0.5137	0.8417	0.0288	1
Bin_4	Methanosaeta concilii	1.45 Mb	305	5,098	0.5374	0.6605	0.0556	0.9967
Bin_5	Unknown_Methanosarcina	1.05 Mb	229	4,694	0.4211	0.642	0.0617	1
Bin_3	Unknown_Porphyromonadaceae	1.38 Mb	271	5,589	0.3721	0.5252	0.0288	1
Bin_1	Candidatus Cloacimonas acidaminovorans	937.20 Kb	168	6,359	0.5298	0.518	0.0432	1
Bin_7	Peptococcaceae bacterium 1109	589.10 Kb	107	6,336	0.5574	0.4317	0.0216	0.9875
Bin_11	Bacteroidetes bacterium 4484_276	586.90 Kb	68	10,342	0.3729	0.4317	0.0072	1
Bin_24	Coprobacillus sp. CAG:826	147.09 Kb	16	11,282	0.3647	0.3453	0.0432	1
Bin_19	Alistipes sp. CAG:831	124.36 Kb	24	5,368	0.4554	0.2662	0.0216	1
Bin_6	Peptococcaceae bacterium 1109	352.50 Kb	80	4,463	0.5739	0.2446	0.0144	0.9813
Bin_13	Unknown_Methanoculleus	188.93 Kb	58	3,159	0.5914	0.2284	0.0062	1
Bin_8	Unknown_Bacteroidetes	691.17 Kb	71	12,745	0.374	0.2086	0.036	1
Bin_15	Unknown_Bacteroides	177.54 Kb	30	6,771	0.4557	0.0935	0.0144	1
Bin_12	Unknown_Clostridia	270.09 Kb	56	5,059	0.4545	0.0863	0.0144	0.9821
Bin_10	Methanosarcina horonobensis	338.06 Kb	75	4,557	0.4201	0.0741	0.0123	1
Bin_9	Unknown_Bacteroidetes	256.80 Kb	37	8,959	0.4466	0.0719	0	1
Bin_22	Unknown_Prevotella	91.65 Kb	20	4,903	0.4718	0.0504	0	0.9
Bin_38	Unknown_Clostridium	50.12 Kb	12	4,936	0.4368	0.0504	0	1
Bin_23	Methanosarcina acetivorans	91.38 Kb	19	6,853	0.4158	0.037	0	1
Bin_17	Lentimicrobium saccharophilum	194.50 Kb	20	13,536	0.3782	0.036	0	1
Bin_20	Herbinix luporum	68.46 Kb	22	3,020	0.3728	0.036	0	1
Bin_39	Clostridium sp. CAG:1024	43.29 Kb	5	7,779	0.5118	0.036	0	1
Bin_18	Bacteroidetes bacterium 4484_249	160.68 Kb	23	7,530	0.3865	0.0288	0.0072	1
Bin_31	Methanosarcina barkeri	44.38 Kb	10	4,294	0.4061	0.0288	0	1
Bin_33	Unknown_Ruminococcaceae	31.80 Kb	6	7,118	0.5049	0.0288	0	1
Bin_14	Fermentimonas caenicola	232.85 Kb	55	4,110	0.3717	0.0216	0	1
Bin_21	Lascolabacillus massiliensis	98.30 Kb	24	4,025	0.3717	0.0216	0	1
Bin_32	Acholeplasma laidlawii	25.61 Kb	8	3,206	0.3227	0.0144	0	1
Bin_28	Methanoculleus sp. MAB1	44.67 Kb	13	3,288	0.5639	0.012	0	1
Bin_16	Methanosarcina mazei	156.41 Kb	35	4,937	0.4075	0.0072	0	1
Bin_25	Methanosarcina siciliae	71.44 Kb	17	4,624	0.4144	0.0072	0	1
Bin_26	Methanoculleus bourgensis	51.98 Kb	16	3,290	0.6016	0.0072	0	1
Bin_29	Sphaerochaeta globosa	43.34 Kb	10	3,594	0.5168	0.0072	0.0072	1
Bin_27	Candidatus Cloacimonas sp. SDB	40.17 Kb	9	4,381	0.5248	0.0072	0	1
Bin_37	Unknown_Treponema	15.47 Kb	5	3,154	0.4401	0.0072	0	0.8
Bin_30	Bacteroidia bacterium 43-41	30.85 Kb	6	6,129	0.4227	0	0	1
Bin_34	Clostridium sp. CAG:349	16.98 Kb	4	3,642	0.3587	0	0	1
Bin_35	Acidaminococcus sp. CAG:917	12.23 Kb	3	6,508	0.3667	0	0	1
Bin_40	Syntrophomonas wolfei	9.39 Kb	3	3,222	0.5147	0	0	1
Bin_36	Sedimentibacter sp. B4	8.47 Kb	3	2,640	0.4081	0	0	1
Bin_41	Unknown_Bacteria	8.22 Kb	3	2,777	0.5183	0	0	0.3333
Bin_42	Ruminiclostridium thermocellum	8.17 Kb	3	2,741	0.4146	0	0	1

## Sheet: Bin 1
gene_callers_id	contig	start	stop	direction	Pfam	Pfam (ACCESSION)	dna_sequence
63	c_000000000023	2	536	f	SecA DEAD-like domain	PF07517	AAAACCACCAAATCCACCCTGGACGACTATCTGCCCGAGGTCTTCGCCATCGTGAAAGACACCTGCCGCCGCCTGCTGGGGCAAAGCTTTGTGGTGCGCGAGCATGAGACCGTGTGGAACATGGTGCCTTTCGACGTTCAACTGATCGGCGGCATGGCGCTGCATGATGGCAAGATCGCCGAGATGGCCACCGGAGAGGGCAAGACCCTGGTTGCCACCCTGCCCCTCTTTCTCAACGCCCTGATTGGCCGCGGCGCGCATCTGGTGACGGTGAACGACTATCTGGCATCGCGCGACGCCGAGTGGATGAGCCCCGTCTTCAACTTCCACGGCCTCACCGTGGGCTGCATCACCACCGGTATGAGCTTTGAAGAACGCCGTGAGGCATACCTCTGCGAT…
64	c_000000000023	504	2049	f	SecA DEAD-like domain	PF07517	GTGGACGAGGTGGACAGCATTCTCATCGATGAGGCGCGCACCCCGCTCATCATCAGCGGCCCCATCGCCCAGGACAAGAATTTTTACCTGGAGATCAAGCCCCAGGTGCATCAGTTGGTGCAATCGCAAAGCGCGCTGGTGCAAAGGTTTTTGAGCGAGATCAACCAGGAACTCCGGGAAGACAACCCTGACCCGGACAACAACCGCCTGGGCACCCTGCTGCTGCAGGTGCAGCGCGCCGCGCCCCGCAACAAAGCCTTTTACAAGCTGATGCAGGACAGCAGCCTCAAAAAACTGCTGCTGGACATGGAAGGCATCTACCTGCGCGACAAAAGAATGCACGAGTTGGACGATAACCTCTTCTACGTGGTGGAAGAGCGGCAGAACAGCGTTGACCTC…
65	c_000000000023	1996	2881	f	SecA Wing and Scaffold domain	PF07516	ATGACCAAGGCGGTCGAACGCGCGCAGAAGCGGGTGGAGGAACACAACTTTGAAATCCGCAAAAACCTGATCAAATATGACGAAGTGATGAACCAGCAGCGCGAGGTCATCTACTCCTACCGGCGCAGCATCCTGAAAGGCTATTCGCTCAAGCACGAGGTGCAGGAAATGATCATCGAGACGGTTCGCCGCGTGATCGGCGAGCAGATTCCCCCCGGCAGCTATCCAGAGGATTGGAACCTGCCCCGCCTCTGCCAATGGTTCAAAAGATCGCTCAACGTGGTCATTTCGCCCGCCGAACTGGAAAGCGACCACCAGAACGAGGACCTGCTGCGCAACACCCTGGAAGCGCTGGTGATGCAGGCATACGAAAAGAAGGAACTGCAGGTGGGAACCGAA…
66	c_000000000023	2926	4471	f	DNA topoisomerase	PF01131	ATGGCCAAAGGGCTGATCATAGTGGAATCACCGGCAAAAGCCAACACCATTTCCAAGTTTTTGGACAACAAATACAAGGTCAAGGCCTCGATGGGCCATGTGCGCGACCTGCCCGCCAAATCGATGGGCGTGGACGTGGAACACAACTTCACCCCGGTCTATGAACTGGACCCCAAAAAGAGCAAGGTCATCGCCGAACTGCGCAATGCGGTCAAAGACGTGGACGCTGTGTTTCTGGCCAGTGACCATGACCGCGAGGGGGAGGCCATCGCCTGGCACCTGACTGAAGTGCTGAAAAAGGAGCTGGGCGACAAGAAAGTTTACCGCATCGTGTTCAACGAGATCACCGCCCCAGCCATCAAAGCCTCCATCTCACAGCCCGGGCAGGTGGATATGGCC…
67	c_000000000023	4448	5156	f	Topoisomerase DNA binding C4 zinc finger	PF01396	GTGAACAGCTTTTTGGTGAGTAAGTTCGACCCTATCTTCAACGTGAAATTCACCGCGAACATGGAAAACGAGCTGGACGGCGTGGAAGAGGGGCGGACTGTGTGGCACACGCTGGTAAGCGGCTATTACGACGAGCTGATGAAGCTGGTGAAGAGTGTTGACCTCAAAAAGGAAAAGGCGTCTTTCACCGAAGCCACGGACATCGTCTGCGACAAATGCCAGCAAGGCAAACTGGTGGTGAGGCGTTCCAAAGGCGGCGAGTTCCTCTCCTGCAACCGTTTTCCCGCCTGTAAAAACATCAAAAACTTCAGCCGCGACAAAGACGGCAAGATCCATATCGAAGAACCCGCGGAACCCCGGATGCTGGACGAAAAGTGTCCCCAGTGTGGTTCACCCCTG…
68	c_000000000023	5134	5791	f	MacB-like periplasmic core domain	PF12704	ATGCAAAAAGACCATGGCCTGAGGCGGAGGGTTCCCGCCTGGGACGCCCTGCAAAGCGCGCTGCAGAGCATCCTCAGCCACAAGCTGCGCTCGCTGCTCACCCTCACGGGCATTGTGATCGGCGTGCTGGCGGTGGTGAGCATGTTCTCCAGCGTTTACGCCCTCAAACGGCTCATTAACCAGAATATGGAAGGCATGGGCTGGAACTATTCTGTGGTGGTCACCGCCGACCAGGAGGATTTTATGGGCTCCAGGCGGCGCGTCAAGCGGCGGGTTTTGCGGAGGGCAAGCCAGAGCGTGCGCAGGCTCAATTATGATGACTATCTGGCGCTCAAGCAGCAACTGCCCCTCAAAAGCAGCTATGCCATGATCGAAAGCGGCTCGATCCTGCGCCTGGGC…
69	c_000000000023	5745	6438	f	FtsX-like permease family	PF02687	GTGGGCGTGCTGGCGGACGACCAGATCAACAAAGACAACGACATGAACTTCAACAGCTGGGAACGCAGGCAGGACCTCAGCGCGGTGTATGTCCCCCTCAAATACGGAGTTTATAATTTCGGCACCAACAAGGGCCTCCACATGATCTACCTGCAGGCGCGCTCGGAGCGGGAATTCTCCGCCATGAAGAACCAGGCTCGCCAACTGCTGCTTGCCCGCCACCGGATGTATCCCAACTTCGGCTTCCTGGATATCGGCCAGATGATGCTCACCATCACCCATGAGATCAGCGGCTTTATGGAAAAATGGAACATCACCCTCATCGCCATCGCCTCCATCTCGCTGATCGTGGGCGGCATCGGGCTTTTCAGCACTCTGCTGATCTCGATCCAAGAACGC…
306	c_000000000080	405	906	f			ATGAAGAAATCCCGGTTCCTCACCTGCGAACTCAAGCGACACCGGCAGATCACGCCGTCGCTGTGCTCGGTGTGCCCGCGCATCCAGAGGTGCCGCGCCTTCCGCATCTGGTATCGCCAGAACAGCCGGGAGTATCTGGATTTCGTAACGGAGATATGCAGAAAATTTCCTGATAAATACTCAATGGAGGTATCCTTCATGGCCGAGAAGCAAACATTTGTCCAGATCGTGGACATGGCCACCGGAAAGATCGACCGGATAGTAAACCTGTCCGAAATCGCGGCGATGACAGCCGAGGAAAAGCTCGCGCTGTCGCGCAACAAAAACCTGTTCATCGTCACCCACCGCCTGGAGCCTATCGTGAAGGTGGAGCTGAAGAGGTCGGTGATCAGCGAACCG…
307	c_000000000080	1045	1459	f			ATGTTTACTTTGGACGAAAAGCATTTGGACAAAGCGAAGGAGTTCGCCGCAAAGCACCGTCGCAAAAAAAGCTGTGACGATTGTTACGACCGCGGCTGGATCGGCACCACCGAACAAAATCTGCTGGTGCTCTGCACGCGTTGCGTGGACCTGGAAGCCGCCATGGCCGACTGGAAGGCCTATGTGAGCGAGCATGAGGAGCTTAAGGAGCACTTCGCCGAACTCTTTGAAGAGAAGAAGGTGGAAGAGGCCGAAGAAAGCAAGCAAGCCGCTCCTGTGGCGCAAAAACACAGGAAAGAAAAACGTGCAGGCAAGAAACACTTTTGTGCCCGGCCAGAAGCGCATGGGGCATTCCAAAAAAGATCGGCTGAAGCAAGGGCTTCCCGCATGAGGATAAAG…
308	c_000000000080	1722	2937	f	tRNA synthetases class I (I, L, M and V)	PF00133	ATGGCTTGCCGGTGGAGATCGAGGTGGAAAAGCAACTGGGCCTGGAAGATAAAAAAGCTATCGAGGAATACGGCATCGAAAAGTTCTGCCCAGGCGTGCAAGGATTCCGTCTGGAGCTACCTGAACCTGTGGCAGGAAATGACCGAACTGATGGGCTACTGGATCGATCTGGACAATCCCTATGTGACCATGCACAACGAATACATCGAGTCTGTGTGGCATATCCTGGACAACTTTTTCCAGCGGGGCCTGATCTACAAAGCCCACAAGATCGTGCCCTACTGCCCCAGTTGCGGCACGCCGCTCTCATCCCACGAAGTGGCTCAGGGCTATGAAGATGTGGAGGATCCCTCCGTATTCATCAGATTCAAGGCTCTGGACGAAGAGAACACCTGGTAT…
309	c_000000000080	2962	3997	f	tRNA synthetases class I (I, L, M and V)	PF00133	GTGCTGCTCACCTGCGACAAATGCCAGGGCGAGATGCGCCGCACCAGCGAAGTCATCGACTGCTGGTTCGACAGCGGCTCCATGCCCTTTGCCCAGTGGCACTATCCCTTTGAAAACAAAGACAGATTCCAGCCGGAGCTGTTCCCCGCCGATTTCATCTCGGAAGGGATAGACCAGACCCGCGGCTGGTTCTACTCCATGCTCACCATCGCCACCCTCTACAAGGGCGAATCCAGCTACAAAAGCTGTCTGGTGAACGACCTGATCCTGGACAAAAACGGCCAGAAGATGAGCAAATCCAAGGGCAATACCGTGGAGCCCATCGCTTTGATGCACGAATTCGGCGCGGACGCCATCCGCTGGTATCTTCTGGAGGTCAGTCCGCCCTGGGTGCCCACA…
310	c_000000000080	3950	4586	f			ATGTATGTGCCAGCCAAGTTCCAGGCCACTGCCGACGCCATGTTTGACCTCATCCAGGAGGAAGTGAATATCCGCCAGATCAGCTATGTGGCGGAAGATGATGATTTTGTGCATTACGAGCTCAAACCGGAGTTCAAGGTTATGGGCCCCAAATATGGCCCGAAGATGAAAGCCATCGCCGCCGAACTGGGCAAGGCCAGGGGCCAGCAGGTGCTGGCGGACTTCAACGCGCGGGGCAGCCACCATCTGCCCGAGACCGGAATCGACCTGCTCCCGGAAGACGTGGCGGTGCATATCCGTCCCCGGGAGGGCTTTGTCTTTGCCAGCAAGAAAGATATGTTTGTGGCGCTGGATACCCAGCTCACGCCCGACCTGATCAGCGAAGGCTATGCCCGCGAA…
311	c_000000000080	4531	5020	r			ATGAAAGGTGGCGTGCTTCCTTGGTTGACTTCCTCTACCCAAGTGAGATGGGGGGATTCCAGATTGTTGAGCCACTTGAGGTTGGGGGAGGTAGTTGACCGTCGCAGCGGAGCCTGTGAAATAGAGCTTGAGCAGATACTCCCTGTCCCCTTTTTGGGTAATATACTTGATGCCTGTGGTGTCCTTATTCAGCAGCTTGACGATCGTGTAATCCCGGAATTTGTCTCCCGGGTCCATGATCTTATAGGTGGGGTCAGCCAGCTCGAGCGGGGCGGATTCCCTGACCACTTCAGGGGCAGGCGGGGCCTCTTCGGCGCGCTGTTCCTCCAGCCTATGTCCGCAATAAACGCAGAACTTGCCTTTTTTGGTGATTCTCTCGCCGCAATTGCTGCAAAAGCG…
597	c_000000000154	0	249	f			AACAAGCTGAACAGCGCTCAGGATCACTATAACAACAAACGTTATGCCGCCGCGATCCAGGAGCTGGATGCCTATATCGGCAAAGCCAAGAACGGCGCTCTGATCACCCGCAGCGAGATCCTGCGCGGTAAATGTTACCACGAACTTGGTCTGATGGCAAGGCAACGGGAAAGCTGGGATCTGGCGGTGAAGTTTTTTGAAACTGTCCAATTCGGAAGAGGCAGACCAGGCCTTGGCCGATGTGTATAA
598	c_000000000154	196	1342	f			TTGAAACTGTCCAATTCGGAAGAGGCAGACCAGGCCTTGGCCGATGTGTATAAGACCCTTTGCTTGAAAGCGCTGGAGCAAAACAACCAGCGGTTGGCACTGGATTATGTCAACGCGGCGCTCAGGGAGATTCCGGACTCTCAGCTCACGCCGGAAATGCTCTCCCGCCGGATCGGCTTTACCCTGGATGTCTATATCGACCATGATCAGGCCTGGGAAGACTATAAAATGCTCTACGACCGCTATCCCAATAATAGTTACGAGCTTGTGGCACGCAAGCAGATCATGAGGATCGTTCCCAACAAAGTTGAATATGCCCGGCAACTTTACAGCACCGGATACTACAATGAAGGGCTTGTCCTGCTGTTTGAACTGGGCAAGTATCCCGTGGTGGACACG…
599	c_000000000154	1447	1933	f			ATGGATGGCAGGACTGGAGAGACCGGGGGGGACTATCGGGCAGACCTGCTGGATCGCCAGAAACTGTTGCAACTCTATGAGATGGAATCAAATCCCATCCGCCGCTCGATCGCGAAATCTATGGCGCTGCCTGGTTGGGGACAGATTTCCAGCCGGTCTTATACCAAGGGCACCATTATATTGGGCAGCGAACTGATTGTATTGGGAGCGTCCCTCTATTTCTTCGACCGCAGCAACTATTATTACGACAAATACATGAATGCCACCCAGATCGATGATATCGAAAACTACTACAGCGAAGCCGTTAAACCCAGGCAATACTCCATTTGCTGCTCTCTCTGGGGGGTATCGATCTGGATTTACAACATCTTTGACGTGATAGAGACCACCGACGCTTAT…
600	c_000000000154	2063	2390	f			GTGTCCAATCTGGTCTGCGTGGGTTCCGTGGCCAGCAATCCACAGAAGTTTGTGCGTCTGAACTGGGATGTGAACTCGGATGAGACCACCTCCGGATACTATGTATATCGCGGTTTTTCTTACAACAGCGATTTTGCCCGGGTAGGTACCGTGGAATCGAATACCGGCCAGTTTATCCATACCGAGACCAACGGTGTGCCGGTGATGCCGGGCAGATACTGGTACCAGGTGTCCGGGTTCAAAGATCACTACGACCCCGATTCCGGCCAATACTGGGGCCGCCTGGAAGGACGCCGTACCTCTCCGGCGTATGTAGAAGTCAAGTAA
601	c_000000000154	2405	2786	f	UvrD/REP helicase N-terminal domain	PF00580	ATGCTTCAGGATTTCTCCCAAGAGCTGAATTCACAGCAGCTGCAGGTGGTTACCAATACCGAAGGGCCGCTGTTGGTTCTGGCTGGTGCCGGAAGCGGTAAAACCCGCTCCATAATCTACCGCTGCGCCTATCTGCTCAAGGAAAAGCAGGTGCCGCCCTGGAATATCCTGGTGGTCACTTTTACCAACAAAGCGGCCCGCGAACTGCAGGACAGGCTGGAGGCGCTGCTCCGTTTTCCTGTCCGCTCCCTTTGGGTGGGCACCTTCCACCGTGTCTGTTCACGCATCCTGCGCTACGAAGCTGCGCATCTGCCATTTGGAGCGAACTTTTCCATCTACGACGAGGATGCCCAGAAGTCGCTGCTCAAAAAAGATCTATAA
602	c_000000000154	2751	3012	f			ATGCCCAGAAGTCGCTGCTCAAAAAAGATCTATAAGGAAGAGGGGTTCGACCGCCAGAAGTACCCCCTGCCCCGGGTGCTGTACCGCATCGGGCGTTACAAAAGCAACCTGCTGCTGCCCGAGGACCTCGCCAAAGACAGCCAGGATGCAGGCTCCGGCAGAGGCTACCACGATGAATTTGAAAGCAAGATACTGCGCATCTATACCCTTTACCAGCAAAGCCTGCCTGCTCAACCAGGCCCTGGATTTCGACGATATCCT
1342	c_000000000334	197	329	f			ATGGTGTCCAGTTGTAATAACGCAAACGAAATAGTATCAGGTTTGGAAACCACCCCCCTTGGCTCACTGTCTGCCCGGACAAAAAAACTGTTGACTAAAACCATGTTCTACAAAGAAGTGGAATATCACTAA
1343	c_000000000334	346	604	f	Phosphoribosylformylglycinamidine (FGAM) synthase	PF02700	ATGCTGCAAGCTAAAATATTCATCCGCCTCAAACCCAACGTTCTTGACCCCCAGGGCAAGGCCGTAAGCAATTCCCTCCATCAACTGGGATACGTCAAGGTGGTGGAGACGAGAGTGAGCAAATACATCGAGATCAGCTTTGATGACGACAATGAACAGGCGGTTGAAGAGCAAGTGCAGAAAATCTGCGCCGACCTGCTTGCCAATCCAAACACCGAAAACTTCACCTATACCATAGAAAAGATGGGGACGGTCTAA
1344	c_000000000334	605	1301	f	CobB/CobQ-like glutamine amidotransferase domain	PF13507	TTGAGAGTCAGCGTGATCACTTTCCCGGGCTCCAACTGCGACCGCGACACCCAGCGTGCCTTTAGTGAGAGGGGTCACACCAGCAACCTGGTCTGGCACAAAGACCGCGACCTGCAAAACCCCGATCTGGTGGTGCTGCCTGGCGGTTTCTCCTATGGCGACTATCTGCGCTGCGGGTCTTTGGCACGCTTCTCTCCCATAGTGAATGAAGTGGTAGCTTTCGCCGAATCCGGCGGACTGGTTCTGGGCATCTGCAACGGCTTCCAAATCCTCACGGAATGCGATTTGCTGCCCGGATCGCTGCTTATGAATTCCGGCCTCACCTTCATCTGCCAGCATCAATACATCCGCGTGGAAAGCGCAAACACCCCGTTCACCCGCAACATCCCTGCGGGCAGA…
1345	c_000000000334	1245	1671	f			GTGACGGCCGAGAGATTTTCGCTGCAATTGAAGACTACTTTGACAGCTCTCGATAACCTGTTCTTTCCCCCCACCTGCCTGCACTGCGGCGCGGGGATAGATTCTGCGGCTCAGGTTCTCTGCGGGGATTGCATCCTTGCCGCCCAGCCAATTTTGGAAAACTACTGCGATAAATGCGGTTCTCCGCTGCGGGATTACAATTGCCCCGCCTGCTCAGAGACCGATTTTGCCTTTGATCTTGCCCGCTCCGCCTATGTTTACAAGGATCCCGTGCAAAGCCTCGTGCACCAGCTCAAATATAACTCTTTGCGCTCTCCCGCGAGGTTTTTCGCCACCGCGCTGCTCAACATACCAGCCGCCGGGCGTTTTGCCAAAGGCTACGATATTGTAACCTCTGTG…
1346	c_000000000334	1976	2360	f			ATGAACAGGGAATATCAGGAATACAAGACCACCATCGACGAAAAAGAAGCCACCGAGATGATCGAGAAGGTGGCGCGCTTCATCGCGGAGCGCCATCTGGGCTCGGCTGGCATCCTGCTCTTGGAATCGTTGTATCCCCTGCACGGCATTGCCAGCCAGGCGATGTATTTTGTGCTGCCCTTTGCCGAGATGATCTTTGACTCCCAAAAATACCAGAATTTTGCTCTCACCATCCAGAATGAGACATACCTGAAACGCCTGATCAACCGCATTGACGAGCTCGACGAAGAAATCAACCGCGAACGCCGGGCTGCGGCACGCCTCAAACGCAAGCGCCGCCGCAACCAGACCAAGGCCTTTTTTTGCCAGAATCTTCAAAACTAA
1347	c_000000000334	2461	3358	f	MutL protein	PF13941	TTGATCGAATGGGTGGATGGCGAATACCGCCAAACCATCCGCGGCGAAGCTCCCACCACGGTGGAAGCCCCGCTCAACGACGTTACCAAGGGCGTCATCAACGCCACCCAGGAGTTGGAGGAGCTGGCCCGCCTCAAGTATAAGAACCCCAACATCAAATTCATGGAAAACGGCGAGTTTGTGATCCCCCGCAAAGGCGATGTTGGCGTGGACGCCTATGTTTCCACCTCCTCAGCCGGAGGCGGCCTGCAAATGATGGTCACCGGTGTGGTGGCCTCCATGACAGGCGAAAGCGCCGAACGTGCCGCTCTGGGAGCGGGCGCCATTGTGATGGACCTGATCGCAAGCAACGACCGCCGCATGAACCACGAGAAGATCGAACGCATCCGCGAACTGCGC…
1348	c_000000000334	3354	3810	f	MutL protein	PF13941	GTGAGCGCCAACCTGGGCATGAGCTACAGCATCTCCAACGTTCTGGCCTCTGCCGGACTGCCCAACATCATGCGCTGGGTGCCACTCGACATCGACGAGAGCGAACTGCGCAACATGATCAAGAACAAGATGATCCGCCCCACCACCATCCCCTCCCTGCTGGAAGAACTGGTGCTGGAACAGGCGATCGCCATCGAAGCCCTGCGCCTGGCTTTTGAACAGCACAAAGAGTTTGCCAGCGGCCTGAAAGGAATGCAGCGCCAGCGCGATATCTCCGAAGCCTTCAGCCAGTCCACCTCCGGGGCCACCATCGTCAACATGATGACCCTCGACCTGCTGGTGGCCAGCGGCGGCGTGCTTTCCCACGCTCCACGCAGAAACCAGACCGTGATGCTGCTC…
1349	c_000000000334	3957	4251	f			ATGCCCGATGGCAGCGTGTGGGAGGAGGATATCCCCTTCGGCGAAGTGCGGCTCATCCCCTGCGCTATTGGCGAAGTTGCCAAAGCCACGCTGAAAACTCATGGCGGCCTGATCCTGGACAAAGACAAAAACCGCGAGCTCAACATCGACCTGCACGGCGGAACGGTTGGCATCGTGCTGGATACGCGCGGACGCCAGCCTTTCGTGCTGCCCACGGAAAAGACCCAACGCATAGACATGCTCAAGAAATGGATGCGCGAGTTTAAAGCGTATCCCGAAACGATTCTGTCATAG
1350	c_000000000334	4260	5061	f			ATGGGACAAGCATATTCAGCCGGATTGACCGTTACCGACAGCATCATTCTCAAGAAAGAACGCATCCTGCCCCTCAAGGGCAAAGTCCTTGTTAAAAAAGGCGATAAAGTAAAGGCCGAGGACGTAGTGGCGGAGACCCTGCTGCCCGGCAAAGTGGTGCCCTTCAATTTGGCCAACAAGCTGGGCGTCACGCCCGCCCAACTGGTCAACTTCATCAAGATCGAAGTCGGCCAGCAGATCACCAAAGAAACCATCCTGGCGGAGACCAAAGGCCTTTTCGGCACGGGACTCTTCAAAAATGAAGTGCGCTCTCCCGTGGAAGGCGAGGTGGAAAACATCTCCTCCGTCACCGGCCAGATACTGTTGCGCGAACCCCGCGTGCCAGTGCAGGTGAAAGCC…
1351	c_000000000334	5008	5392	f			TTGTTTTGCACCGAGGGTTTTGGCAAGATCGACATGGCCAAGAAAACCTTTGAACTGCTCAAAAAGTTCGATGGACACAAGACCTCGATCCACGGCAAGACCCAAATCCGCGCCGGCGTGATCAGACCTGAGATCATCATCCCGCTCGATTTTGACGAAAAGGAACTGGTGACCAAAGAAGCCACCATGCCCGTGCTGGAGCCGGGCACCCTGATCCGCGTGATCCGCCAGCCCAACTTTGGCAAGATCGCCAAGGTCATCTCCCTGCCCGAAGAGCTAACCAAAGTGGAGTCGGAGACCCTGGTGCGCGTGTTGGAAGCCCAGTTTGAAGACGGAACCAAGATGATCATCCCACGTGCCAACGTGGAAGTGATCGAAACCTGA
1352	c_000000000334	5589	5745	r			ATGGGGGCGGAGGCAGTCGCAGAGGGCGGATTTGTGACATCCGCGGCGCAAATCCGAGTTGAGGGGTTTATCATGCAGCCATCAAAAGAAAGCGAACTGCTTCTTTGGGCCCCGATACTCTCATGCCCCACTGATCGCCAATTGATGGCCGGGTAA
1353	c_000000000334	5902	6223	r			CTCTATCTGGAAGACATCCCCGCCCAGGTGATCAAGATCATCGACGTCAAGTGTCCCGGCAGCGGATGCGCGGACAGCTTTATGAAGTGGAACCTCAAGCTGTTGCAGCCGCATGACGAACTGAAGTTCGTGCTCACCAACTATCAGGACTATCTCTTTGCCAGGCAATTTATTAAAGACAATTCCCTGGAGTCCCGCACCCTTCTTTTTTCGCCTGTCACCAGCGTGCTGCCAGCCCAAACCCTTGCCCAATGGATGCTGGATGACGGCCTCACGGCGAGATTGCAGTTGCAACTGCACAAGATTTGCGATCTGAAGTAA
1686	c_000000000406	40	922	f			ATGAATAAACTACTGATCCTGAGCTTCGCGCTCTGTCTGGCCGCGGGCTGGTTGTGGGCGGGCAATTCCATCTTTTCCTACGACGGCTTTCCGGTGCAGTATTACGGCACGGACATCTACGGCCTGGGTATGGGGGACACCGGCGCCAGCGACATCTTCCGCGTCAACGCGGGTTACGGCAACCCCGCCATGAGCAGCCTTGGCAACCGGACTCTGTTTTCCACCGGCATCCTGGCCGGCTACAACCGGTACCGTTCCAGGGACGGGGGAGGCGATTACAGCTATCTGGACAACTCGCTGGACTTCCCCTATTTCAGCCTGAGCGTTCCCGTCAAAAGCCACCGCGTGGGCTTCCAGTTCCATTCCCAGGCCTCCGGGGTGGTGGAAAACCAGCGAGAG…
1687	c_000000000406	869	1244	f			ATGAGCGGGATTACCGGGATGGCTGGAAACTGGGGGCTGGGGCTGGCTTATGAACCGGCTCCAGACAAGGATAAAAAGGTGTTATTGAGGCTGCCTCTGCGGGCTGGCGTTGCCTATCGCCAGTTGCCTTTCCGCTCCGGCGGAGAGTATCTGGACGAGCTGACGCTGAGCGGAGGCATGTCTTTGAAATTCAAGGATGGGCAAAACAGGATCGACATCGGTTTTCAGTATCTGCAAAGAGGATCGCTGGATCAGAACGGGCTTTCCGACAACAGTTTCATGCTGATGTTTGGCTTTACCGGTTCCGACCTTCTGAACAAAGCCGCCAACCGCAGCGCCCCCAGAGAGATACCTGTGAAGGAGGACGCTGAATAG
1688	c_000000000406	1243	2041	f	DHH family	PF01368	GTGATGGGATCACAAGCAAACCCGGAAGGTAAACGAATTCTGCGCGCGGTGGCTGCCAGGAGAGGATTTCTGGAAGCTGACCTGCGCGCTACAGTGGAAGACCTGCCCGATGAAGCGCTGCTTGCCAATATCGGCCTGGTTTCCGAACGTATCCGCAAAGCGCTCTATTCCAATGAACCGCTGGTGATTTTCGGCCACGACGATCCGGATGGCATCACCAGCACCTACATCCTCTACCAGTTTTTAAACTCCTGCGGCTATCAGAGGCACAACTACTTCATCCCCAACCGTAACCTGGAACCGCACGGCATTCAGCAGGGCTTCATCGACTATGTGCGCGATGGAGGCTACACGCTGGCGATCGCCGTTGACAACGGCATTTCCAGCTATCAGGGGGTG…
1689	c_000000000406	2019	2595	f	DHHA1 domain	PF02272	ATGCAGTCGGCATCCAGGCTGATCGCCAATGGCAGGGAAGAACGGGGCCAACACACCGCGATGCGCTTTTTGTTGCAGATGGGCGATGCCAAAGCCGAGCTGTTTGAAGACATGGAAGCCCAGAAAAAGCAATGGGAAAGCGAACTGAACAAGGTCTTCAGGTTTCTGGATACCATCACCGTGGATTATGAGGGCAACGGATTCATCTATTTTGACGACGAGGGAGTGATCCCCTACAGCCTGCTTGGCACGGCTGCAACCTATATTCTGAACAAACTGGGGACACCCACCATTATCCTCGCCCCGCACAACGGACATATCGTCTGTGAAGGGCGCTGCTCCGATGGATTCAACATGGTGGAGGCCTTCCGACATTGCCGGGATTTGCTGATCCAGTAT…
1690	c_000000000406	2536	2806	f			TTGAAGTGGACGCCAAAGCGGATTGCAGACCTCAGCGTGGAAGCCTGGCGGGAGCTTGAACTGCTGCTCCCCTTTGGCCAGCAGAATCCCGAGCCTGTCATCCTGATCCGCAACGTTAGTGCCGATGATCTGCAAAAGCGCTTCAATATCGAAAACTGCGGAAGCAATCTGCGTACCGGGGGGCAAGGCGAGGCGATCGTTTCCTGGAAAGGGCTCCAGACAGTGCGCTTGCTGGAATTTCGCAAAAGGAACGACCATAAATCAAGGTAG
1691	c_000000000406	2814	2931	f			ATGATCCACCTGAAAGAAACCCTGCGCAAAAGCATCCACATCGGATCGCTGTCGATCCCGCTTTCTACAGGTATGTGTTGGGTTTTGAACATCGCGACTGGATGTCCTATCTGTTGC
1866	c_000000000445	0	672	f			ATCTTTTTGCACCAGATCTACAGCGTGTCTGCCTCTACCTACGTTACCAATTCCGCTCACTGGTGCAACCTGATGGGCGATCCCACCATGGAGGTGTTCACCGGAAGACCCAATTTCTTCAATATTGCCACCTTGGACAGCATTCCCCTGGGCCTCAACCTGATGGACTTCGCTGTGACCGATAGTCTGAACATTCCCGTGGAGGGCGCTTGCGTGACCATCTCCCAGGGAAGCAATATCATCAGCAGGGGCTACACCGACGAAAACGGCAACGTGATAATGACCTTGCCCCAGTCGATGGTAGCAGGCCAGTGTGTTATCACCGTGTCAAAACACAATTTTAAACCCCTCCAACAGAATATTAACGTGGTTAACCACGGTACCCTGGTGCCTGGCGAG…
1867	c_000000000445	650	1847	f			ATGCTCCCCCATGAGAGCATGATGCGTATCCATCTGATCCTAACAGACAGCCTGGGCAATAGCTACGATGTTTCGGAATTTGTCCCCATCCACAACGCGAAGATCATGTACAACAACAGTTTTGTGACCAACGGCGGCAATCAGGTGCTCGATCCTGGCGAGACCTCCGGCTTCACGGTCACGGTCAGCAATACCACCCCCACTACTGTCACTAACATTACCGGACGGCTCTACAGCCTGAACGATCTGGTTTCGGTGGGGGACAACACCGCCTATTATGGTGAATTGCCTCTAAACGTCCAAGTAACTCCTTCCACCGATTATTTTGAGATCACGGGACGCCCAGCCCTGTTGCCGGGCATGGTGATCCCCATGCAGCTCAAGCTCTACAATGATGCG…
1868	c_000000000445	2106	3387	f	Carboxypeptidase regulatory-like domain	PF13620	GTGGTCAATTTCAACCTGGATGTGGTCTCCGGCGAAAGCCTGTGGTCCCGTCCCTTCAGCCTCCGGGTGGACGCATCCGTGTTGGTGTTTGAATCTTTCATGATCAACGATGCCGATGGCACCTACAATGGTATCATCGATCCGCTGGAAACGGTGCAACTGGTGGTAAATGTCAAAAACCAGGCCGATGTGGATTCCCGCGATATCCTGGCCAGCCTAAGCAGTTCCAGTTCCGAGGTCTCAATCGGCCATCCCCTGATTCAACAGCCCCTGATCGGTGCCAACGCCATTCAGCAATTTGTTTATGAACTGCAGTTCACGGGCACCAGCGGACTGGGCAGCTACATTCCTTTCCAGTTCAACGTCTCGCTCAGCAATGGACTGCCCATCTCAGCAAAC…
2342	c_000000000566	280	1483	f	tRNA synthetases class I (W and Y)	PF00579	ATGCGATTTGAACAAGAAATAAAGGTGATCAAACGCGGGGTTGATGAGATCGTCCCTCTGGAAGATCTGCTGCAAAAGCTGGAGAAAAGTGAAAAGAGCGGCAAACCCCTGCGCGTGAAATTTGGCATCGATCCCACCGGCTACGACGTGCACCTGGGTCATTTGGTGCCCATTCGCAAGATGCGTGATTTTCAGGATCTTGGCCACCTGGGAGTGATCATCATCGGCGATTTTACCGCCCAGATCGGAGATCCCACCGGACGCGACGAATCCAGACCCCCGCTTACCCACGAAGAGATCATGTACAACAGCGAAAAGTACATGGATCAGCTCTACACCGTGCTCAAGCCTGAACTCACCGAAGTGCGCTACCAGAGCGAATGGTTCGGCTCCATGGGG…
2343	c_000000000566	1479	2133	f			ATGAGTCCTGAACTGCAAATGAAGATGATCAGTTTTGGCACCAATGCCATCATTGTGTTTCTGGTCTTCTATTCGATCATCCTGCATGAGATCAGCCACGCCATGGTTTCCAACTGGCTGGGTGACGATACCGCCAAGCGAATGGGACGCCTCAGCCTCAATCCCCTCAAGCACATAGATTGGTTTGGCACGGTGATCCTGCCTCTGCTTTTCTATTATACGTTGGGCGTGGTGTATGGCTATGCCAAGCCGGTGCCCCTCAACCCCTACAACTATCGGAACTTCAAGCGGGACACAGGCTTGTGTGCACTGGCGGGACCGGTTACCAACCTTCTGCTGGCAATACTTTTCGCGCTCTTTTTCCATTTGAGTCCGGATAACGCCTATATCCAGCACGTG…
2344	c_000000000566	2175	2493	f	Glutamine synthetase, beta-Grasp domain	PF03951	ATGACAAAGAAACAATTGCTGGATTACGCCGCTGAACATGAAGTGAAAGCGGTGGACCTCAAGTATTGCGGCTTGGACGGTCGCTGGTATCACATCACCTTCCCCACCAGGGGCTTGGAAGAAGTGTTGGAACTGGGAATTCCTTTCGACGGCTCCTCCATTCCGGGAATGAAATCCGTGGAATCGGGCGATATGGTGCTGATGCCGGATATTTCCACAGCCCAGATCGATCCTTTCTACGAGACGCCAACTATGCGCCTGATCTGCTCAATCTGCGAAGCCGACACCCGCGTCGGGGGTGAAAAAGGATCCCCGTAG
2345	c_000000000566	2518	3598	f	Glutamine synthetase, catalytic domain	PF00120	ATGCTTTCCACCGGTATTGCCGACAACAGCACCTGGATTCCGGAGCTGGAATTCCATCTCTTCGACACTGTGGAATTCGACAGCGGAGAGTTCTCCAGCGGATATACTGTAAGCTCCGCCGAGAGCAAGGACGCGTTGCCGATTGATTATGAGGATGACGACGCGGTGGCTCAGCAGGAACGCAAAGGCTACCACATGGACACCCCCTTCGACCGCTTCTATGAAATCCGCCAGGAGATGGTGGACACAATGGAAGAACAGGGGATCAAGGTTCGCTATCACCACCATGAGGTGGGCCTCAGCTCGCAGCAGGAGATCGAGCCTGAACTGCTGCCTTTCCCCAAGATTTGTGACGACACCATGGTGATGAAGGACGTCATCCGCCGCACCGCCCTCAAC…
2346	c_000000000566	3659	3878	f			ATGAAAAGAATTATAGTTTCAGCCTTGTTGAGTCTGAGCTTGTGCCTGGCTTTTGCCATGATCACAGAAAGCCAGCCGATTCAGCATAGGGATGCTTTTGAAATAACGGCCAGAAGCCAGAACTATATGGATATCCGGTTTGCGTTACCGGAGTTTGAAGTGGAAGATGTCACCGCTGGTGGCCAGAACTTCCAAAGAATTATGCTTCCCGGCGCGGGA
2571	c_000000000636	2	314	f			GCTGGCCTGCGGGAGGAACTGGAGCGCGAACTTCTGTTCACAGCAGGGTTCAGGCTGGCTCGTTTGCGCGACGCCGCGGGTGTCGATACCGCCCAAGCGGACAGCAGCTTTTTCAGTGAATTGGCTGGGGAAAGCGGAGCCGAATACATCCTGCAAGGCAGTCTTAATTGCCGGCGGGAGAAACGGACGCGCTGCTTTGCGCTGTCTCTGGAACTGGTAAAGTTTCCGTCAGGCGGGATTTGCTGGCAGGACAGCCTGACGCTGAGCAAAGCTCTCAAGGTGAAGCTGCCCGGGCAGTCCAGGCCAGAATGA
2572	c_000000000636	354	1491	f	Phosphate acetyl/butaryl transferase	PF01515	ATGCAGATTAGCAAGCTTGATGAAATGTTCGAAATCTTAAAGCCGCGGCCGAACAAGCGTTTGGTAGCGGCCTGGGCAGTGGACGCCCACACCATTTGCGCCGTGCATCAGGCGGTGGAGATGGATCTGATCGAGGGAATACTGGTGGGCGATGAAGCCCTGATTAAGAAGGTTTGCGCCGAGGAGGGAATCGATCCCTCCTGCTTCCGCATAGTTCAGGTGGACAACGATTTGAGCGCTGCAGCCAAGGCGGTCGATATGATCAACGCCGGAGAAGGCGACTTCCTGATGAAGGGGCTGCTGAGCACCGACCGCTACATGCGGGCTATCCTGAACAAGGAAAAAGGCCTGATGGATAAAGGCGCCATCCTCTCCCACGTGACGGTGGCGGAAGTGCCC…
2573	c_000000000636	1540	1921	f	Phosphate acetyl/butaryl transferase	PF01515	ATGGTCAAATCCGGACAGGCGGATGCCCTGATGAAAGGGCTGATCGGCACCGACAAGTTCCTGAAAGCCGTATTGAACAAGGAACATGGCCTGCTGCCCCCCAAGGCGGTGATGAGCTATGTCTGCGCCCTGGAGCTGCCCCGCTATTCCAAGCTGCTTTTTATAAGCGACACGGCGGTGCTTCCGCAACCCGATCTGGCGCAGAAGCTTGCCATGATCAACTACAGCGTGCGCATGGCGCGGCGCTTTGGCATCGCCAAACCAAAGGTGGCGCTGATCGCGGCTTCGGAAAAAGGTTTCCGCCAATCTGCCGGATACCGAGGACTGCGCTATGCTTGCCAAAATGGCGGAGCGGGGGCAAATCAGGAACTGCGTGGTTGA
2574	c_000000000636	1871	2195	f	Phosphate acetyl/butaryl transferase	PF01515	ATGCTTGCCAAAATGGCGGAGCGGGGGCAAATCAGGAACTGCGTGGTTGACGGCCCGCTGGATGTCTTTCTGGCATGCGATCCCTCCGCCGGAGAGGTGAAGGGGGTGCACAGCCCCATCGCGGGAGAGGCGGATGTGCTGATCTTTCCCGATCTGGCCAGCGCTAACAGCTTCTACAAAGGCTTGATGCTCTTTGCCCAGGGCGAACTGGGCGGCCTGATCCAGGGCACGGAAAAGCCCGTGATCGTGATGAGCCGCAGTGAGAGCGCTGCCTCCAAATATTACTGCATCGCCCTGGCATGCTTGATGGCAGGTGAACAATGA
2575	c_000000000636	2191	2632	f	Ribose/Galactose Isomerase	PF02502	ATGATACTGGCAATAGCCTCCGACCACGCCGGCTTTGAGCTCAAGGAAGCCATCAAAGCGGCATTCCCCCAACATGAGTTTTTAGATTTTGGTGCGCCATCGACAGCTTCGGTCGATTACCCCGACACTGGAAGCGCCGCCGCCAAAGCGGTAGCCGCGGGCAAGGCGGAACTGGGTATCCTGGTCTGCGGCAGTGGCATCGGGATGAGCATCGTGGCCAACAAGATACCCGGCATCAGGGCTGCCCTTTGCTGCAGCACAGATGTGGCGCGGCTGTCCAGGCTGCACAACGATGCCAACGTCCTTTGCCTGGCGGGCAGATTCACCGCCGTCCCCTATGCCCTGGAGATAGTCCAGGCCTGGCTGGAAACCAGCTTTGAAGGAGGCCGGCATCAAAAG…
2576	c_000000000636	2876	3920	f	Serine hydroxymethyltransferase	PF00464	GTGGAACGCCTGGCCATCGAACGCGCCAAGCAACTCTTCGGCGCGGAACATGCCAACGTCCAGCCCCACAGCGGCTCCCAGGCTAATATGGCCGCCTATTTTACCCTGGTCAAACCGGGAGATACGATACTGTCTTTGGAACTGGCGCACGGCGGACACCTCACCCACGGCCATCCCCTCTCATTCAGCGGCCAGTTCTACAATATCATCCACTATCAGGTGGATAAAACCACCGAGCAGTTCGACTATGACGAACTGGAAAAGATGGCGCTGGAACACAAGCCCCAGATGATCCTGGCAGGCGCTTCCGCCTATCCCCGCAAGATGGACTTCGCCCGCTTCCGCGAGATCGCCGACAAGGTGGGCGCCAAGCTCATGGTGGATATGGCTCACATCGCC…
2577	c_000000000636	4177	5014	f	Mechanosensitive ion channel	PF00924	ATGCCTATTCTTTTACAAGTTGATACCGTGATGACCAATACCGCCGCCAAAGCGGAGGAATTGGCCAGGCCCGAATTCTGGGACAAGGTACTCAAGTTCGTCCAGGTTTATGGAATAAAGCTCATCATCGCTTTACTGATCTTCTTCATCGGCAAATGGATCGCCGGCCTCATCGCCGGAGGCATCCGCAAGATGATGGTGCACCGCAAGTCTGACGTGACCATCGCCAGCTTTGTTAGCAACATCCTTTACGCCCTCATGCTGCTGATCGTGGTGCTGACCGCGCTTAGCGTCCTGGGGGTCAAAACCTCCTCCTTCATGGTGATCGTCAGCGCCGCCGTTTTGGCCATCGGTATGTCCATGCAGGGCACTCTGTCCCAATTTGCCTCCGGTGTGATG…
2578	c_000000000636	5044	5899	f	Protein of unknown function (DUF3078)	PF11276	ATGAAACTCGCAAAACTCACCCTACTTTTCCTCGTGGCATTCAGCCTGTCCCTGCTTTCCGCAAAAGGCTGGGAAGTGGATTCGGACATCCTGATCAACCTCACCCAAGGCATCTACTCAGACAACTGGAGCGGTTCAGAACAGAGCACCGTAACCTGGGTGGCTCAATCCAACACCACTGCCCAGAAGCAGATGAAAGAATGGCTGAACAACAAAAACACCCTCAAGCTCGCCTTTGGCCAGACCCATCAGGAAAAGGGCGACATCGACGGCGACGGCGAAGTGGAATGGGGCAGCGGCCAAAAATCCACCGACAAGATCGACTTCGAATCCCTGTTCAGATTCACCCTCAAATCATTCGTGGACCCCTACATGGCGCTCAGGATGGAATCACAGTTT…
2579	c_000000000636	5974	8197	r	E1-E2 ATPase	PF00122	ATGAAAAAACAGATCAACATTGGCATTGACGGGATGCACTGCGCCACCTGCAGCGCGCGCACCGAGAAGGCGCTGGCGGAACTGGAGGGAGTGAGCGCGGTTCATGTAAACCTGGCTCTGGAAGATGCTTCCGTGGAGTATGATGACAGGCACGCCGGCCCGGCTGATTTCGAGCGGGTGATCCAGTCGCTGGGGTTTAGCGTGCGCCAGGAGATCAGCATCGGCGAGGACGAGCAGGTTGCCAGGATGAAAGACGCCGAGCGCAGGATGTGGATCATGTGGGCGCTTGCGCTTGCCGTAATGGCCTTGATGTTGCCTCTGATGCTGCTGCGGCTGGAGCCTGCCTGGCATCACCTGGGGATATGGGCGATTTTTGGCCTCACTTTGCTGGGCATGCTG…
2580	c_000000000636	8626	8767	r			TTCGCGAAAAAGCCGAAAATCATGCCCTACAAGCTCGAACAGCAGGGCGAGGCCGTGGCATGGGACCACAAGGGCAAAGGCTACTTCACCCTCAGCGAAAGGGTTGGCAGCACACCCGCGGAGCTTTATTACTACAAATAA
2581	c_000000000637	2	689	r	NifU-like N terminal domain	PF01592	ATGATGCTGGATTTGAACGGCATCACCGTCGCCACCGGTTCCGCCTGCGCTTCGCAAGGCCTCAAACCGAGCTACGTGCTGCTGGCTATGGGCAAAAACCACGTGCAATCCCATGGCTCCATAAAGTTTACCCTTTCCCGCTACAACACTAGGGAAGAGGTGGACTTCGTGGTTGAAAAAACTCGCGGAGATCACTGCCGAACTCCGCTCCCGCAGCCCCGCTCTACAAGTCAACCCATCCCGAGGAGAGATAAATGCAATATTCACAAAAAAGTGCTCGACCACTTCATGCGCCCCCACAACGTCGGGCAGATGGAAAACCCTGACGCAGTGGCCACTGAAGGCTCGCCCTCCTGCGGCGACCAGGTGACCATCTATCTCAAGATCAACCCCGATACC…
2582	c_000000000637	685	1630	r	Aminotransferase class-V	PF00266	ATGAAATCTGGCAACATTTACATGGACAACTGCATTACAACGCCCCCCGCGCCGGAGGTTTTGAAGGAGATGAAGACCTATTTCGAGGACAGATTCTGGTTTCCAGCTTCCTTCATCAGCACGGGCGAAAGCACCGCCGAGGCGGTCGCTTCCTTCAAAAAGACGGTGGCGGATTCCCTCAACGCCTCCCCGGACGAACTGCACTTCACCTCCGGAGGCACCCTCGCCAACAATATCTCCATCAAGGGCGTCACCCTGTCCCGCGCGGTGCGGGGACGCCACGTGATCTGTTCCGTGGTGGATTACCCCGACCTGCTCACCAACGCCGCCTTTCTGGAAAAGATCGGTTTTGAGGTCAGCTACCTTGAACCGGATGCCCAGGGCCGGGTCAGTCCACAA…
2583	c_000000000637	1630	1807	r			ATGCGCGCCGTGGACGACTCGAACCACGAGATGGAATGCGGCAAAAGCGGCCCTTATTGCCGGGGGGAATCCTGCCGCCTGGGCGGTCTGTTCGACGAGATCGCCACCCGCCAGCGCAGGCTGCTGAACAGCTACACCCTGGCCGAAATCGGCAAAATCTATCATGGAGCAACATAA
2584	c_000000000637	2173	2752	f	ABC transporter	PF00005	ATGATCAAGGTAAACAAACTCAGCTTTTCCTACGGAACTGACCTGGTGCTGCGGGATTTGGACCTGCACCTGCCCGAAGCTGCCATGACGGTGATGGTGGGGCCAAACGGAGCGGGAAAATCCACTCTGATCTACGCGCTTTTGGGTTTCCTGAAGGCGCAGGGGGGCAGCGTGTCCCTCTTTGGCAAGTCCCTGCACCTCTACAAACGCTCCGAGCTTGCCAAACTGATCGCCTTCGTGCCCCAGGAGACCAGCTTCCAGTTCGATTACAGCGTGCGGGACATCGTGCTGATGGGGCGCTATCCCTACCAGGGGCTGATGCAAACCTGGCTGCCCTCCGACCATCGCGTGGTGGACGGCATCCTGGAACAGCTCAGGCTGCAGGGTCTGGCGCACAGA…
2585	c_000000000637	2700	2955	f			ATGCTCATGCTGGTGGATATCGTCCGCCAAAGCCGCAAAGGCATCCTGCTGATCTCCCACAACCTCAATCTGGGAGCGAACTTTGCGGATCAGATGGTCTTTCTTGGCGGAGGACGCGGTTTTGGGACAGGGCGAGCCAGCGAGATGATGCGCCCCGAAAAGCTGCGCGAGCTCTTCGGAATTGATCTGCAGGTAGCCATGAACCCCGTCAGCGACAGGCCTAACCTGCTCTATCCCGGAAAGCCATTAACATGA
2586	c_000000000637	3042	4497	f	TonB-dependent Receptor Plug Domain	PF07715	ATGATTTACGGCCAGGTGCGTGACGAAAGCGGAAAGGCCCTGGAAGGCGCCGTGGTCACGGATGGCAGGCAAACCGTGTTCAGCGCCGCGGATGGCTCATACACCCTTCTGGACGGCGGGGAATGGATTACGGTGAGCAGAGTTGGCTACAAGGAACAGAGGTTCCGCCATCCTAAGCTCCGCGTCTGGCAGCGCGATGTCATCCTGCAGACGTCTCCGATCGTGCTGCCCACGGTGAGGGTAACCGAGACCAGCCTGGATCCCTTTTCCCAGGCGGCAGACCTGCTGCGCATCCCGGTGGATGAGGAACGCAGCTATCTGAGCACGGTGGATTTGCTTTCCAGTTCCACCGCTTTGCGCAGTTCAGACACCCCCCTCAAGGGTGAAAGCCAGAGGATT…
2587	c_000000000637	4435	5134	f	TonB dependent receptor	PF00593	ATGGTGGAAAGCACGCTGGGCGGCACTTTGGGCACCTCTTTCTCCCTGCCCTCGCCCTATGACCTTTACTGGAAAGGAGATTCGCAAACCCTGGGCAACCCGGCGCTCAAAAGCGAACTCTCCAAAGGCTGGCAGCTCTGGCTGCAAAACCGCTATGGCCCCTTCAGCCTGAAAGCCGCCTGGCATCAAAACGACATCAAAAACCTCATTCAATGGCGGCAAATCCAGATGAACGGCAACGTCTGGAAACCCTTCAATATCGGCCGCGCCAGCATCCGCAACCTGGAACTGGAATCCAGCCTGCAAGTGGCAAAGTGGCTGGAACTGAGCGCTTCCGCACTGCGCACCAAGGCATTGGATCTCAGCACCCTGCCCGCTTCCTGCGCCCCCAAGCTGATG…
2588	c_000000000637	5444	5723	r			ATGACCTGGCGCCGCAAGTGGGTTGCCAGGCTGCATAACGCCTATCCCAATCCTCTGGACAGGGGCGGAAGCGCGCTGATCAAAACACAGATTCCCGAGCATTCAACCGGCACCCTGAGTATCTTTAACCTGCGTGGACAGATCGTATCCCGCCACAAACTGGGCTCAGGTTCGCGGCAGATATCCTTCAGCGGGGATGGCCTTCCCGCGGGAGTCTATTTTTACAGCCTGCAATGCGGGGATTACAAGGAGACTAAGAAGCTGGTACTGCTGAAATGA
2589	c_000000000637	5685	5928	r			GCCGGCAACTGGCTTTGGGCTGCCAGAGCGGGAGGGACAGAATTTGACGACAGCTATGGATATGGCATCGCCCTGGATGGCTCGGATAACGCCTGCGTGACCGGTTATTTTGATGGCACAGCCAATTTTGGCAGCCACAGCCTGATAACAAACGGCTATCGGGACATCTTTGTCGCCAGAGTGGAAAACATTACGCCGGTTGAGGATGACCTGGCGCCGCAAGTGGGTTGCCAGGCTGCATAA
3142	c_000000000777	75	1167	f	RNA methyltransferase	PF04452	GTGTTTGAAAGAGACGGCAATAATATCATCCTCGAGTTTCCCATCAATGTATCCCAGGCCGTTTTGGGGGATGAAATCCTGGTGCCCACTTTGAGCGGCAACGCCAAGATGAAGGTTCCGGCGGGGACACAGAGCGGAAGGCTGTTTCGCCTCAAGGGACAAGGCATCCAGGGTCTGAATTCATACTCCAGGGGAGACCTGATCGTGAAGGTGAACGTGATCACCCCCACCAGGCTGTCCCGCGAGGAGACAGAGCTGTATCAGAGAATCCGCGAATTTGACAACAAAAAGGGTGCTCAAGCCAGGCAAGAGCTTTCGCGACAAGCTGAGAGACCTGTTTACCTAAACTGTAAGCAAATGCCTTCCTACTACTTTCCCGGATTGAACAAGCTGGCCAGG…
3143	c_000000000777	1130	1499	r			ATGAATTGGGTTCAGGCGGATCATTCGCTACTGATGCTCTTGATTATAATCGCCCTTGTGACGACCTTTGCCACAGAGATTGTGAGTAATTCGGTGATCCAGATCGCCATGTTTGTAACCCTCTTTCCTCTGAGCAGGGCCTGTCCGCAGATCTCAACGGAAATAATGCTGATCATCACTCTCACTTCCACCTGCGCCTTTATGACACCTATCGCTACTCCCAGCAATGGTTTGGGGTTTGGAACGGTAAAGAATATCTCCCTGGGTTATATGCTGGTTGCCGGATTTGTGATGAATCTGGCCAGCGCGGTGTTGATCAGCCTCTGGGTGCACTATGTGGTGCCCATCGTTTTAGCTTGGTTCGCATAG
3144	c_000000000777	1495	2374	r	Sodium:sulfate symporter transmembrane region	PF00939	TTGCACATATCTCTGGATAAGATCCAACTGATCCACTTTTTCCTGATATCGTTTCTGGTATCGCGTCTCATGATCCGCCATAAGCTGCCTGAACGCTTGTTGTACTGGCTGTTCGAAGAAAAGCACATCAGCATCTCCAGGCTTGCCCTGATCATCATCCTCTCCACTTCCCTGCTGTCGGCTGTGATAGCCAATGTGATCTCGCTGCTGGCTGTCTTGCCTGTAATCTTGCTATTGCAGGAAGAATACACCGGTAGTGATAAGAATAAGCGTAAGTTTTCCACCATGATCATGCTGGCTGCAATCTGGGGAGCCAATATCGGCGGCATGGGCATGTTGACCGGGACCACGACCAATGGTGTGTTGATTGGGATGCTGGAAACCTTCCATTTCCAAGAG…
3145	c_000000000777	2354	3437	r	Tetraacyldisaccharide-1-P 4'-kinase	PF02606	TTGTCCAGCCAGGACTTGATATCCCGACATTTGTTGCGCAGATCCTGGCTGAGCAGGGCGTTGATCCCGCTCTCCCAAATCAACGCCTTCTATCAGAGGATACGCAGGAAAAAAGCGGCGCAAAGCGCCTGGCGAGCCCCCTGCAAGGTGATCAGCATCGGCAACATCACCAGCGGGGGCAGTGGCAAGACCCCTTTTTGCATATATCTGGCCCAGTTGCTCCAGACAAAAGGAATCGCGATGGCGGTCTCGCACAGAGGCTACAAGGGCGCGTTTGAAAGCACTCCCACCCTGATCTCCAGGGGAGCCGGTTCCCTCTACGATGTATCTGACACGGGAGATGAAGCCGGCCTGATAGCCAACCGTCTGCCGGGGATTCCGGTTGTGGTTGGAAAAGAC…
3146	c_000000000777	3438	3819	r	Response regulator receiver domain	PF00072	ATGATGACAACGATTTGCCTCGTCGATGACGAAGAAGAATTGATTTCGAACTTGAAAATAGAGCTTGAATCGCTGCGTCCGGACTGGAGGATTCTGGCATATTCCAATGGTATGGATGCTCTCAGGCAGATAATCCAGGGCAGGGTGAACCTGCTGGTCACCGATATTGCCATGCCCGATATGGACGGATACGAGTTGTATTGGAGAGTCAAAGACCACGACCCCTCGATTCCCGTGATCATGATGACCGGATTCGGGTATGATCCCAACCATGTGTTGGTGAGGGCAAAGTCCGATGGCCTCAAGGATGTTCTGTATAAACCTTTCGACACCGAGAGGCTAATAGAGCTTATCAATCGCAAACTCACAGAAGGGAAGTGA
3147	c_000000000777	3826	4270	r	SAICAR synthetase	PF01259	TTTGCGCACCCTCTGTTTACGCCATCCACAAAAGCTGAAGCCGGGCACGACGAAAACATAAGCTACCGTGAGATGCTTCATTGCATGGATGAGCGGATAGCGGTGTTTTTGAAGAACAAATCGCTGGCAGTTTATAACTTTGCCCATGAGATGCTGCTCAAGGCGGGGATTATTCTGGCGGATACCAAGTTCGAATTTGGCACCATAGGAAACCAGATCTACCTGGTTGACGAGATCCTGACTCCAGATTCATCAAGGTTCTGGCCCGCCGAGAGCTACGAAGTGGGAAAAAGCCCCGCCAGCTATGACAAACAATATATCCGCGACTTTCTGACCCAAAGCGGTTGGGACAAACAGCCTCCTGCTCCCCATTTACCAGATGAGGTGATCCGCAAAACC…
3325	c_000000000828	2	167	r	Haloacid dehalogenase-like hydrolase	PF13419	ATGAAGAAAAAACCCAAAATCAAAGCCATCATTTTTGACCTTGATGGTACCCTGTTGGATAGCTTGCGGGATATCGCTGACAGCATGAACAACGCTTTGGCCGATAGCGGTTTACCTGAGCATCCCCTGGAGGCGTATAGAGATTTTGTGGGTAATGGGCTATTT
3326	c_000000000828	163	1006	r	Mechanosensitive ion channel	PF00924	ATGAACTTCACAGAACTGATCAGAATGTACATCACTCCCGAACGGATCAACGTAGCCTTGCGGGTGATCATTGCGCTTGGCATTGGCATTCCGGTTATAATCCTGATACGGAAGCTTGTCACCCGGATGGTCAAGGGCCGCCTTTCGCCTCAAAGCGAGCAGTTGATCGTGCGTGCGGTTTATTTTCTTAGTGTGCTGATCCTGGTGGTGAGTGTGCTCAATGAATTCGGCTTCAAACTCTCGGCTTTACTGGGAGCTGCCGGAGTGCTTGGCGTGGCGATCGGTTTTGCTTCGCAGACCAGTGTTTCAAACATCATCAGCGGCATCTTTCTGATCTCGGAAAAGCCATTTGTGGTGGGCGATTTTATTGAGGTGAACAAAATCCGCGGCAGGATAGAA…
3327	c_000000000828	1187	2081	f	UDP-N-acetylglucosamine 2-epimerase	PF02350	ATGCGCGTAGTCCAGATTGTGGGAGCCAGACCCCAGTTTGTCAAGCTTGCCCCTCTGTCACATCTGCTAAGAAACAAACACGAGGAGCTGATCATCCACAGCGGCCAGCATTATGATATCCAAATGAACGACGTCTTTTTCAGGGATATGCTCATTCCCGCGCCGGATTACAACCTCAATGTCGGCTCAGGCTCCCATGCTTTGCAGACCGCCCAGATCATGGAAGCCCTGGAGCCTATCCTGCTCAAGCATGAGCCTGATGTCGTGATCGTCTATGGCGACACCAACACCACCCTTGCCGGAGCCCTTACGGCAGTAAAACTGGGCATCAAAACCGCGCATGTGGAGGCCTGCCTGCGCAGTTTCAACCGGACTATGCCGGAGGAAATTAACCGCGTG…
3328	c_000000000828	2305	2854	f	Phosphoribulokinase / Uridine kinase family	PF00485	ATGACAAGCAACAACGTTCGCCTCATCCTTATCGCCGGAGGCACCTGCAGTGGTAAAACAACCATCGCCAGGGCCATCGGACGGCGCATCACAGGCCTCAAATCTGTGATCCTCTCTCACGACAACTATTACAAGGATCTCAGCCATCTGCCCAGCGAGGAAGCCGCCCGGGTCAACTTTGACCACCCGGATTCCATCGATACAGAGCTATTGATCTCCGACCTCAAAGCAATGCTGCGCGGCGAAGCGGTCAATGTGCCCGATTACAATTTCGCCACCCACAGCCGCAGCGAAGGCACTCTGTGCATCGCGGGGGCGGACGTGATCATCCTGGAAGGGATTTTTGCCCTTTATTACCCGGAATTGCTGGCGCTTTCCGACCTAAAAATCTTTCTGGAT…
3432	c_000000000854	78	912	r	ABC-type uncharacterized transport system	PF09822	ATGGCTCAAAGATCGCAAATATTCAGTTCCTACCTGCTGCGCGTGGCCATCGCCGTGATGGTCTTGCTGGTGGGGGGCTTGCTCTACCTGCGCCAGGATGCGAGCCGCGACCGCGTCTATTCGCTCAGCAAGCACAGCCGCACCACTGTTCGCGCCCTCAAGGACAAGGTGCTGGTCAAGGTCTTCGCCTCGCGTCAGCTACCTCCGGAGTTCAGTAATCTGAACCGCGCCCTCAAAGACCTGCTGGAAGAGTTTCAACGCAATAGCCGCGGTAAGTTCCGCTATGAATACGCCCGCTTCGCCACCAATGAAGAGCTGTTGTCCCAGGCCAGCGCCAGTGGGATTCAGCCCTATGTGGCGCACATCCAGGAAAACGACGAACTGGTGAGCAAGGAAATT…
3433	c_000000000854	913	1636	r	ABC-2 family transporter protein	PF12679	ATGAACCCCGCCCTCACCATCGCCCGCAAAGAATATCAGCTTGCCATGCGCAACCTGAGCACTTACATCGTTTTGGGCATTTTCCTGATCTTTACCGGATTCTATTTTGGCAACACCGCCTTCAAGGTCGGCCTTGCAGAGCTGAGGGGGATTTTTGGCTTTATGCACACCCTCTTCCTCTTTTTTATCCCCGCCCTCACCATGGGGAGCATCACCCGGGAGCGTCACAGCGGCACCCTGGAACTGATCTCCACGCTGCCCATACGGCGCGGGCACATCATCTGGGGCAAGTTCCTGGCGGCTTTCGGCCTGCTCAAGACCGTGCTGCTGCTCAGCCTTGTCTATCCTGTGCTGGTGCTGCTTTTTGGCAGTGGCTTCGACATCGGGGCTGCAATCAGC…
3434	c_000000000854	1632	2682	r	ABC transporter	PF00005	ATGATAGAGATCAAGAACCTCTCGCGCAGCTTTGGCGAGCTCAGAGCTGTGGACGGGATAAGCTTCCGGGTGGAACCCGGCGAGATCGTGGGCTTTTTGGGGCCCAACGGTGCCGGTAAAACCACCACCATGCGCATGATGACCGGCTATCTGCAACCGAGCGGGGGTGAGATCGAGCTGGATGGCGAAAGCATCTTTGCCGACCCCCTCTCCGCCAATGCCCGCATCGGCTATCTGCCCGAGCAGAATCCGCTCTATGCCGATATGGACGTGGAGGAGTTCCTCGTCTATATGGGACGCTGCGCAGGCTGGGCAAGGGAACAACTGTCCGGCCGGCTGGACTACGTGCGTGACAAATGCGGCCTGCAGGATGTGTGGAGGCAAAGGATCGGCACCCTC…
3435	c_000000000854	2692	3352	r	Barrel-sandwich domain of CusB or HlyD membrane-fusion	PF16576	ATGATCAAGGATATGGACGTGCCCGGCAAGGTGATCCACGTGTATGCCACCTCTTCCGGCGTGGTGATCGAGCGCAAGGTCAACGAAGGCGAGATGGTGCAATCCAGCCTTGGCAGCTTTGGCGAGGGCACGGTGCTGATGAAGATCGCCGACCTGGCCCAGATGACCGTCGCCAGCAAGATCAACGAGGTGGATATCGCCAAATTCAGGTTGGGACAGGAAGCCACCATCAAGCTGGACGCCCTGCCCTATGAGGAATACAGCGGCCGCATCGTGAAGATCGCCCCCTCGGCGGTCGTCGAAAACAACGCCAAGGTCTTCCCGGTGGAGATCAGCATCGATGCCAGCGGCGCCAAAGCCAAGCCGGGCATGACGGCGGTGGTCACGATTATCGGCGAA…
3436	c_000000000854	3348	3846	r	Biotin-lipoyl like	PF13533	ATGAAAAAGAAATGGAGAATTATAATCGGGATCGCGGTTGCGCTGATCCTGCTGGTGCTGGGTCTGCGCGCCTGCGGCAAGGCGGGCGGCAAGAAAATGGCTCAAGACGCTGCCCCGCAGTCCTATACGGTGGCTCGGGGAGACATTGTCACCAAGATCGAGATCACCGGTGAGGTGCAGCCCAAAACAGTGGTTGCCCTGAAATCCAAGGTCTCGGGCAAGATCGTGAAACTCTATGCCGACGAAAACGACTATGTTAGCCAGGGACAGAAGATTGCGGATATCGAGCCGGACTACAATCAGGCCAATACCCTGTTCAGCACCAAAGCCCAGCTCAGCCGCGCCGAAATGCGCCTGAGAAACGCGCGCAAGGATCTGGAGGACAAGCGGGTGCTGCTG…
4043	c_000000001012	691	1786	f	IMP dehydrogenase / GMP reductase domain	PF00478	GTGGTGGAAAATGGGAAGCTGGTAGGCATCCTGACCAATCGCGACATCCGCTTCGAGACCAACACAAAAAGACAGGTGCATGAGCTGATGACACCGGCTGAACGTCTGGTAACAGCGCCTTTGGGAGTGAGCGCGGAGGACGCGATCCAACTGCTGCAGAAGAACAGGATTGAAAAACTGCTGATCGTGAATGAAGATTTCAGTCTGGCGGGAATGCTGACAGTGAGGGACATTCTGAAGCGGATCAACCATCCCAACGCCGTTCAGGACAGCAAAAATCGCCTTTTGGTGGGAGCAGCCGTGGGAGCCTCCGGAGACTTTTTAGAACGAGCCCAGGAACTGACAAAAATGGGAGCGGACATCCTGGTGATCGACACCGCCCACGGACACCACAGCAAC…
4044	c_000000001012	1873	2689	f	Phage integrase family	PF00589	TTGAAAGCTACCGCGGGGACATCCAGGACTTTTTTGCAATACAATACCAAGGCAATCGCGGAGTATGCGCCCGAGGACATCACGGAGTATCTTGCCACATTGTCCGGTCTGGGGCTGGCAAACACCTCCCTGGCCCGTAAAAGGGTGGCTCTCAAGCAGTTCTTTGGCTTTTTACAGGATAACGAGGTGATTCCTGGCCTGGATTTCGACAAAGTTCCCAAGATCAAGCTGGGCAAGTATCTACCGGATGTGTTGGATGTGGACACCATGTTAAAATTGCTGGACGGACTACCTACCGAAACGTGCCTCGAGCGGAGAAACAAAGTGATGCTGGAACTGCTTTATGGAACCGGTTTGCGTGTGTCTGAGCTGTTGGGCTTGAGCGTACACGACATCAAC…
4045	c_000000001012	2701	3160	f	NMT1/THI5 like	PF09084	GTGTTTAAGAGATTTTTGTTAGTCCCGTTATTACTTGCGCTCATCCTGGCTGGAACCTCCTGCAAGGGAGGTGAAACCAAGCAGAAGAAGCAATTACGAAAGGTCCGTGTGGTCTTGGACTGGACCCCAAACACCAACCACGCGGGGTTGTATGTAGCCAAGGAACTTGGCTATTTCGCTAGAGAAGGCCTGGAAGTGGAAATCATTCAGCCGGGTGAGAACACCGCCGAAAAGATCGTGGCCTCCAACCATGCTGATTTTGGCGTGAGTTACCAGGAAAGCGTCACCATAGCCTGCACCCAGAACATTCCCATCAAATCCATCGCGGCGATCATCCAGCACAACACCTCTGGCTTTGCATCGCTCAAAAAGTCAGGAATCAAGTCTGTAAAAGACTTT…
4046	c_000000001012	3159	3684	f	NMT1/THI5 like	PF09084	ATGGCTCATGGCGGGGCTGACTACCGGAAACTAAAGGTGGTAAGTGGAGTTTACGATTTCTTTTCCACCATCGGTAAAGATGTTGATTTCGAGTGGATCTACTATGGCTGGGACGGCGTCCAGGCAGAACGCAGAAACATCGCCATCGACTATCTCCCCATCCGCGACTTGAGCCCGGTATTCGACTATTATACGCCGGTTTTGATCAGCAGCGATATGTTGCTGAATTCTGAGCCGGATTTGGCAAAATCTTTCCTCAAGGCAGTTGCCGATGGTTATGAATATTGCATTGCTAAGCCGGATGACGCAGCCCGGATACTGGCTAAAGCAGTTCCTGATCTGGATGAAGAGCATCTAAAACTGAGCTTGAACTACCTGAAGGATGAGTTCCGTTCGGAT…
4047	c_000000001012	3683	3959	f	ABC transporter	PF00005	ATGCCTGTAATTCTGAGCGCGGAAGGCCTGGCCAAATCCTTCCTGCTGAACGGCGAGCCCCGGCTGATCATTTCAGGTCTGGACCTGAAGGTCAGGGATGGCGTGTTTCTGAGCATCGTGGGCAGTAGCGGCTGCGGCAAGAGCACTCTGCTTGGGTTGCTAGCCGGCATCACCCGCCCGGACAAAGGAAGAATCACGTTGCGCGGTGAAGATATCACAGGTAAAAGCGGAGTGTTGGGCTATATGCCCCAGGAGGATTTGCTTTTCCCCTGGCTA
4213	c_000000001062	0	234	f	Bacterial regulatory protein, arsR family	PF01022	CCGACCCGCCTGAAACTTATTTATTTCCTTTCCCAATATGAATTGTGCGTGGCTGACCTTGCCAGGCTATCCGAAATGGAACAATCGGCCGTATCCCACCAATTGAAGATCCTCCGCTTGCACAGGCTGACAAAGCAAAGAAGGGATGGCACCACAATCTATTATTCCCTGAATGACAATCATGTGCGCGAGGTGTTCGATGTCGCCCTTGAACATATAGAGGAAATCGGATAA
4214	c_000000001062	233	1991	f	E1-E2 ATPase	PF00122	ATGACAGTAAGAGAATATGAGGTTAGCAATCTCAGCTGTGCGGATTGCGGAAACAAGATAGAAGCAGGCATCCAGGCTTTAAGTAACGTCAACAGGGCAAACTTGGATTTCATGGCAAAGAAACTGACGGTGGAGTATCATGAGAAAGTTGATAATCCCCTGATAATGTTGAACAGCGTTGCTGCCTCAATTGACCCTGCAGTGGAAATATCTGAAGCAGGGGATTTATCGCGGAAGAAAAAAGCGCTTTTCGCCTGGCTTCCCCTCGCCGCTGGTCTGGCAGTTATCATCGCATCCCAGTTCCTGCCTTTGCCTTGGAAAAGCTGGCTGGGCTTGGCGGCGTATATCTTGGTTGGATACAGGGTGTTACGGGATGCCGCGCACTCCATTGTCAAGAAA…
4215	c_000000001062	1983	2307	f			ATGAATGACGCTCCCAGCATCGCCAGAGCGGATGTGGGTATCGCCATGGGAGGCATCGGCAGCCAGGTATCGGTGGAAAGCGCAGATGTGATCCTGATGCAAGACCATCCAAGGCAGTTGACCGCCTTATTCCAAATCTCACACAAAACAGGCAGATTTGTGGCGCAGAACATCACCCTGGCGCTGGCAATCAAGGTCTTGGTCATGGCCCTGGGGGTTGGAGGAATCAGCGGCTTGTGGGAAGCCATCATTGCCGATGTGGGCGTCACCCTGCTGGTGATCTTCAATTCATTACGGATGACGGGTTGGAAAAGCCGGACTTGA
4216	c_000000001062	2368	4168	f	tRNA synthetase class II core domain (G, H, P, S and T)	PF00587	ATGAGTATAAATATCACATTGCCAGATGGCTCGGTCAAGAGCTATGAAAGTCCCGTCAAGCCTTTGCAGGTAGCCCAGGATATCAGCCCCAGACTGGCTGATGCCTCCATATTAGCCGAAGTGGATGGAGTGGCAGTCGATCTGGATCACGAGATAGTGCAAGACTGTTCGCTGATGTTGCATACTTTCAAGACAGAACAAGGCAAGGAAGTATATTGGCACAGCACCTCGCATCTGATGGCCCAGGCCGTGAAGCAGCTCTTCCCCAGCGTAAAGGTTACCATCGGCCCTGCCATCGAACAGGGTTTTTACTACGATTTTGACCGCGACACACCCTTTACCGACGAAGAACTGGCTCAGATCGAAGAACGGATGGTCTTCCTGAGCAAGCAGAATCTT…
4217	c_000000001062	4326	5295	f	SIS domain	PF01380	ATGGATGTATTAAGATCGCTACAGGAAGAACTGAACAAGGAGGCCGAGGCTATCCTTCGCGTCGCACGGCAACTTGATCCTGAGCAGGTGAACAAAGCCTTTCAGCTTCTACTCGATTGCCAGGGTAAGGTCGTGGTTACCGGCATGGGCAAAGCGGGCATCATCGCGCGTAAGATATCCGCGACCCTCGCCAGTACCGGCACCACATCGATATTCCTGCATGCCGCGGAAGGCATCCACGGCGATCTGGGCATGCTTCAGCAACATGACCTGCTTTTAGCGGTATCCCACAGCGGAAACACCCAGGAATTGCTTTCCATTATACCCTATGTGAAGTTTGTGGGCATCCCGATCATCGCCATCACTGGCAATGTGGATTCTCCCCTGGCTCAGAACGCG…
4218	c_000000001062	5304	5520	f			ATGCCAAATGACCTTCCTCGGGAAGAATACTCACGGCTGGAGCTGTTTCTCAACTATCGCCGCTTTCTAATGTTCGCTTTGTTTTACGAACAGATCAAAGAGGGCGATCCCGCCTATCTGGAAGTGTTCAGGCGGGACATCCTCTCCGGCGCCAGGTATCTGCCTGTCAGCATAGAATCTCTTCTAAGCGGGATATCCTTCAGCGTGAATGTATGA
4219	c_000000001062	5551	6820	r	CAAX protease self-immunity	PF02517	ATGATAAATGTAGTTATCAACCTGATCAGCCTAAGCTTTTCAGTGCGTTACCTTGTAGCTCAGTCCGGACTTGAAACCAGCGGCGTCAAAATGCCGGTTAGCGCTTTCCTGATCCTGCTTGTGGCGATGTTGCCACTGGCTACATTGTTTGCCGCCATACTGCTGTCGATTTCCACTTTTTCCCGCAATATGAAAGAAGCCCGCACCTACGAGCAGCCGATCATGATGGTCTCGATGTTGCTTGGCATGGTAAGCTTCATTCCCTCCATAGAGTTTTCAAACCTGCTGGCTATGGTGCCGGTGATCAATATAGCGCTGCTTTTCAAAGCCGTGATGATTAATGAATTCACTTTGGCGCAGCTTTTGATTACGATATTCTCTACAGTGCTGCTGGACGTG…
4220	c_000000001062	6837	7089	r			TTGGTGGCTGATAAGATCGATCCCGAGATTCTGTCCCTGGTGGATGTAAACCCCCGTGACACCTCTTCCTCACAGAAGAAAATGGGGATGTATCTGGGGATGATGATGCCCTATCTTGTGATCTTGTTGTTGGTGACCGGCGCTTCCACGGTGGCGGCGGATCTGGTGGCCGGAGAAAAGGAAAGGCACACGCTGGAAACGCTGCTGGTGTCATCGCTTCGCGGCAGGAGATCGTCCTGGGAAAATATCTGA
4221	c_000000001062	7040	7571	r			ATGAATTTTAAGAAATCGCTGATCGTTTTCCGCAAAGAGCTTTCTGAGCTGCTGAGAGACCGCCGTACTTTGTTTACCAACATCATTTTGCCTGTGATCTTGTATCCACTGTTGTTCGTAGGTTTCAGCGCAATCATGAGCAGGCAGGCAGGCGTGATAGAAAAAAAGGGGGCGACCATTGCCTATACCGACAGCCTGAACCAAAGGGATGTAAAGTCTATTGCGATGAGGGACTCGCTGTTGGCAAAGATCAAGTCCCTCGACTACGTGACCCTGATTCCATGTCCCAAAACTGTGCAACAACTGTATGAGGATAAGGAAATCCAGGCGGTGCTCACTATTTCGGACTCCCTCACCTCAAGCGGCCTCAACACCTACAAGGTCTATGTGCAGCATGAT…
4222	c_000000001062	7560	8328	r	ABC transporter	PF00005	ATGATAAAGGTTGATTCACTGGTAAAAGAGTTCAAAAAGAAAGACGGCAGCTCATTCAGGGCTGTTGACGGCGTATCCTTCGAGGCGCAGAGTGGAGAAATTGTCTGTCTGTTGGGCGTTAATGGAGCTGGCAAGACCACCATCATGCGTATTCTCTCCACTGTATTCAAGCCGCAATCTGGTTCAGCCCTGATAAACGGGTATGATGTGGTGACTCAGGGTGACAAAGTTCGCGGCAGCCTTGGTTTCCTGTCTGGCGATACCGGTTTATATACCCGTTTAACGCCGCGGGAATTCATCCGCTATTTTGGCAGGCTTTATGGAGTAGCGGATGAAGACATCAATTCGCGTATGTTGGAAATGGCAACATTGCTGGAGATGCACGACTTTCTGGATAAA…
4261	c_000000001071	132	633	f	Putative threonine/serine exporter	PF06738	ATGCAAGGACGGAAAGTGTTCGCTGCAGGCGCGGATATCCGCAAGGAACTATACTGGATCGACAACGAAAACACCCATCCCGCCTGGCTCACGGTGCTCTGCGGAGGCATCACCAGCGGCTGTTTCTGCCTGCTTTTTGGAGGCAGTTGGGCGGAGTTTGGCGTGGCCTATCTGGTGGGTGTGCTGGTGAGCCTGACTCTCAATTTACTGAGCCTGCTCAAGATCAACAACTTCCTCCTGCACGTCGCCGGCGCCGCGGCCGTGGTGCTTTTCGCCAAGCTGCTTGACCTGGTGGTGCCGGGCATCAAGCTGGACAACATCATCATCGGGGGCATTATGCTGCTGGTGCCGGGCCTTTCCTTTGTGAACGCCATCCGCGACAGCATGAGCGGAGACCTG…
4262	c_000000001071	634	1087	f	Threonine/Serine exporter, ThrE	PF12821	ATGAAGCCTTTCGACACCCTGACCCTGATGCAGTTTTGCTGGGCTTTTCTCTCCATCCTGGGTTTTTCCGTGCGCGTCAACCTCAAGGGCTGGAAGCTGCTCTTCCTCGCTTTGGGCGGAGGGCTGAGCTGGGCGTTATACCTAATCATCCTCTTTTACAGCAAGTCCTTGCTCTATTCCATCTTCGGTTCGACCTTATTGGTATGTATCTACTCGGAAGTGGTGGCCAGGAAACTGAGGGTGCCGGTGTCGGTATTCGTGACCTGCGTGATCATCCCCCTGGTGCCCGGCAGTTCTCTCTACTACGCGATGCAGGCCTACATCGCGGGAAACACCGCCGAAGCCTCGGTGCAGATTTACAAAGCGATCCTGATCTCGGGAACCATCGCCATGGCCATC…
4263	c_000000001071	1571	1904	f			ATGGCTACCCAGAAGATCCACTCCCTGGAGGCCGGATTGGTGCTTTTGGGTGACGGTTCCGACATGGAAAAAGGCCGCGCCCGCATCCCCTCCATGCTCTCCAACGAGCCCAAGGTGGGCGACATCCACCGCACCTCCGCCAGCGCCATCCAAAAAGTCAAAATCCACAAAGGAAGCGAGAGGCCAATCGCCATCACGGTGGAGATGAGCGCATCGGTGGGGTTTTTCCAGATCGAGGAAGTCTTTTTCCCCAAGATCAATTACAGCCCTGTGAAGCCTTATATAGAACTTTACGCTGGAGTGATAGACCGCGAGATGCTGCGTTATCTGTGA
4264	c_000000001071	2027	2525	f	Outer membrane protein beta-barrel domain	PF13568	ATGAAGAAACTGCTAATCATCGGCGCCGTCCTGCTGCTCTTCATGGGCCTGGCGGAGGCCAAAACCAGAAACATGTATGGAGTGAAAGGCGGCGTCAATATCGCCAAGCTGCAAATCTCCGAGACAGACGGAAGCGTGGACACCTCCACCAGCCTGGGCGCCGTCGTGGGCGTGCTGATGCAAAGCCGCCCGTTGCGCAATCTGATCATTCAGCCCGAACTGCTCTACTCCCAAAAAGGCTCCGACATTCAGGATACGGACAAGCTCACCATCAGCTATATCACGATGCCTGTGCTGCTCAAGGCCGCGCTCAGGGTGGACAGCTTGCGCATCCAGCCTCTGGCGGGGCCGGAGATCGGTTATGCCCTCAGCGCGAAATCCGCCAACGATGTGGATTAC…
4276	c_000000001078	270	891	f			ATGGCCTTCCCATTCAACATGAACCGCATGCTGGAAACCGAGCTGCGCTTTCCGCAGCGGTTTACGAACATGACAACAAAAGACTACGGGATGCTTTTCTGGAATGAAGGCAACAAGAGATCCCACGACTCCAACCACGCGATCATCACAGACCACCTTGGAGCGGAGGCTTCGGTTCGCGATATCGAGTTCTTTTTCAAGTCCAAGGGCATAGTCCCCAGAATCTACCAGTCCTACACACCCAATGAACTGGAGAAGATCGGCACCGCCCTGGAAAACCGCGGCTTCACAGTCCAGATCCACGAGGATCAGTTCTTCCTGTATGACCATGAGGGCAGCTTTCAGCCCGTGCCGGAACTGCGCATCGAACGCCTGCGCACCCTGAGCATCGACATCATG…
4277	c_000000001078	872	1028	f			ATGCTGGATCATCTGGTAAAATACAGCCACCGGATCAACGACAACCACCTCTACCTCTACTCGGAAATCCCCACGGCGAACCGGGTCTATGAAAAAGCCGGATTTTCAGCCCTGCCGCAGGATTTTAAGTGCTGGACGGCCTACAAGGAAATTTGA
4278	c_000000001078	1153	2419	f	Protein of unknown function (DUF4080)	PF13311	GTGAAGCTGCTGGAGTTTACCACCAGCGAGCCGCTGTTTGAGATCCTGGCGCGAATCGCCTGCCACAAGGCCGACATCTATTGCTTTTCCGCCTACGTATGGAACCGGAACATGCTACAGGCGCTGCTTCCGGAACTCGCCAAGCTGCAACCCCTGAGCAGGATAGTCCTCGGCGGCCCCGACGCGGATGGCGCCGCCTATGGGCTGCGTCCGCAGGATTATGTGGTGAAAGGCCCCGGCGAGGGAGCCCTGCGCCATCTGGCTGACAGCGCTTTTACCCTGCCGGGTGGAGAACTGGAGCACCCCGCTCCCCCGTTGCGGGAACTGCCCTTCCCCTATCGTGCCGCGGACAGGCCCGCCCTGCGGGACAGGCTGGTCTATTACGAGACTTTCCGGGGT…
4279	c_000000001078	2445	3198	f	TerD domain	PF02342	ATGAGTATCAATGTGGAAAAAGGCCAGGCCCTGGGTCATGCCGAGCTGCTCCAGGCCGCCGGAGGCCAGGCCCCCTCAAAACTGCGGATAGACATAAGCTGGCAGTTCAAAGACGGGCAGAGCGCCCTGCTGGATGCCTCCGCGCTGCTTTTGGGCAAGGATAAGTTGATGCCCGCCCCGGACGCGCTGGTCTATTTTAACCAGGCCAGTTACCAGGATGGAGTCCTGCGCCACGAAGGAGTGCAAACCGCCGGAGGAGAGCGGATTGTGGTTGATCTCGCGCAACTGCCCCAGGAAGTGAAATCTCTGGTGATAACGCTCAGCAGCCAGCCCTTCCCCGGAAGCGCGGAAGGTCCGGTGCGCCTGGGTGTGCTGGACAGGGTTTTCCTCAAGGTTTTC…
4411	c_000000001117	876	2064	f	Transketolase, thiamine diphosphate binding domain	PF00456	GTGGTTAGCAATGGGCACATCTCGCCTGCCGTATATTCCGCCCTGGCGCTCAACGGCTACTTTTCCCTGGACAAAGCCGTGTCGCAGTTCAGGCTCTGGGGCAGTATCTTTGAAGGCCATATCGAGCGCGAGGTTCCGGGAGTTGAGTGGTCCAGCGGCAACTTGGGTCAGGGCCTCTCCGCTGGTGCTGGCATGGCGCTGGCCTCCAGGATCAACTCCATTCCCTACCGGGTCTATGTGATGATGGGCGATGGCGAACAGCAGAAGGGGCAAATCTCTGAAGCCCGCCGCTTTGCCTTGAAATATGAATTGAACAACCTCTGCGCGATCGTCGATTACAATGGCCTGCAGATCAGCGGAAACATCAAGGATGTGATGCCGCAAAACATACGTGCCAAC…
4412	c_000000001117	2060	2576	f	Transketolase, C-terminal domain	PF02780	GTGATCCGCTGGCTGATAAACCGCTCTGGCAATTACATGGTGACCATGGGACGCTCCAAAGTGCCAATCATCAAGGGAGAGGATGGAGTTCCGTTCTACGGACTGGATTACACCTTCGACTATGGCAAAGAGGATATCCTGAGAGTGGGAAACATGGGCAGCATCTTCGTAACCGGCACCCCGGCCGGAAAGGCAGTCAAAGCGGTTGACAAGCTCCGCGAACAGGGAATCTATCTGCAACTGATCTACGTTTCCTGCCCCCTGGCAATCGACAGGGAAACCCTGGAAACCGCCGCCCGCAACAAGATCGTGTTCAGCATCGAAGACCACAATGTCAACAGCGGCCTGGGGTCAATCCTGGCTGACCGGATCGGCGAGGAAAACCTTTGTTGCCGCCTG…
4413	c_000000001117	2673	3066	f	4Fe-4S dicluster domain	PF13187	ATGAAGTCGCTGAAGACCTATCCAGAAAACTGCGTCGCCTGCCATGTATGCGAGAGCGCGTGTTCAAACCTGTATTTCAAGGTTGACGATCCCGAAAAGTCGAGGATCCGCATCACCGAGACCGACTCACAACCCCGGATGAACGCCTGCACCCAGTGCGGAGTCTGTGTGCAAAGCTGCCCCACGCTGGCGCTGAGCATCAACAGCCAGGGGGTGGTGATGGTCAACCAAGCTCTTTGCATCGGCTGCTACATGTGCATAGCTGCCTGCCCCACCGGATCAATGTTCCGCACCATTGGCGCAATCACCCCCTTCAAATGCGTCGCCTGCGGCGTATGCACCAAGACCTGCCCCGCGGACGCCATCCGCATCGAAGAAAACAAGGAGAGTTAA
4414	c_000000001117	3068	4298	f	Aldehyde ferredoxin oxidoreductase, N-terminal domain	PF02730	ATGACAGACCGCAGAGTACTGGCTGAATTCAGCTATGAATTGAAACCCGTTATCAAAGGCTACAACAGAAGAACCCTCTACATCGACCTTGGCGGCAAGAAAATAGAATCCAAACCAGTGTCGGACATGATGATAGACAAGTTTGTGGGCGGCAAAGGCTTCGACCTCTATCTGATGTGGCATGGCGTGAAGGACGATACCAAGTGGAACGATCCCGAAAACGAACTCTGCATCGCCTTTGGCCCCTTGTGCGGCAACACCAGCTACCCCGGCAGCGGGAAATCCATCGTCACCACCATCTCACCCCTGACCGGCATACCTGTGGATTGCAACGTGGGAGGCCATTTTGGCCCCTACGCCAAATTCTCCGGCTGGGATGCCATTGAGATTCAGGGCAAG…
4415	c_000000001117	4270	4909	f	Aldehyde ferredoxin oxidoreductase, domains 2 & 3	PF01314	ATGGAATGCTATGAATACGGAATCCTGAACAAAGAACGCACAGGAGGCATCGACCTGACCTGGGGCAATGCCGACGGCGTGTTTGAGCTGATCCATCAAATGGCCCGCGGAGAGGGTTTTGGCGTGATCGTTGGACAGGGCGTGAAAAGGATGAAAGAGATCTTTGCCCGCGATTACAACGCCGATCCCAAGCTCTTGCAAGACATTGGCATGGAAGCCAAGGGCCTGGAGTTTTCGCAATACCTGTCCAAGGAATCGCTGGCTCAGCAAGGCGGCTACACTTTTGCCCTCAAGGGGCCCCAACATGACGAAGCCTGGCTGATCTTCATGGATATGGTCAACAACCGTATCCCGACCTTTGAAGACAAAGCCGAAGCGCTGCACTACTTCCCCATGTTC…
4416	c_000000001117	4880	5204	f	Aldehyde ferredoxin oxidoreductase, domains 2 & 3	PF01314	ATGAGGATGGGCAAGGGCCGCCGCATTGACGACATTCCACCCTATCGCGCCGTGGGACCTGTTACCGAGGAAGAATACCTCTCCCGCCAGGAACGCTACGATTCGCTGTTGCAGAGCAAACAGGGAATCGATCCTGCCGGCAAATCCACCACGGAAAAGATGAGCCTGCTGCGCGAATACCGGGAAGACCAGTATCAACAACTGATAGATGCCGTTTACAAACGCAAAGGCTGGACTCCCGAGGGCGTTCCCACCATTGAACACCTTCAGTCCATTGGCATGGACCTGCCTGAAGTGATCGAGGTTGTGAAACGCTATCTGTAA
4417	c_000000001117	5322	5835	r	Thioredoxin-like	PF13899	GTGAGATATTTACTGATAGTGATCATGATCTCTGTTGTCGCGGTCTTGGGCTGCACGCAACAGGAAGTGGAAGCGACCGATGAGTTGCAGCAAGAAACTGAGGGGCAGGCTGGCGAAGCTTCCTCTTACGAACCGGGAACCTGGATCGCAGATTATGACCAGGCCCTGCTTTATGCCAGGGAACTGGAGCGTCCGGTACTGGTCAACTTCACCGGCTCTGATTGGTGCTACTGGTGCCAGCTCTTGAGCGGCGAGGTCTTCGAGAAAGAAGCCTTTCTGAAATTTGCCGGCGACAACTTCGTGCTGTTGAAGGTCGATTTCCCCCAGAAAACCAAGCTTCCTCAGGAAGTCCAAAAAGCCAACCAGGCTTTGGCTGAAAAGTACGAGATTCAAGGGTTT…
4418	c_000000001117	5831	6263	r	OsmC-like protein	PF02566	ATGAGCAGTAAGACCTCTGCCACATGGGTTGGGGGTCTGGCTTTCGACGCTGATATCAACGGCCACCATCTGATAATGGATGCCGATAGGGGGAGTGGCGGAGATAATCGTGGACCCAGGCCCAAACCACTTTTACTCGCGGCCCTTAGCGGTTGCTCTGGAATGGACGTGGTGTCCATACTGGAAAAGATGAGGGTGGGAGGTTTTACCCTGCGGATCGACACCGAAGCCGATTCCACTTCCGAGCATCCAGTTACCTATCACACTATCAGATTCAATTTCCACTTCGAAGGGAGCGGTCTGCCCCCGGAGAAGCTCGTAAAAGCCGTAACCCTTTCCACGCAGAAGTATTGCGGCGTGTACGCGATGCTGCAAAAATCCGCGCGGATAATTGTTAAG…
4419	c_000000001117	6262	6718	r	MarR family	PF12802	ATGAAAGTCACTGCTGAAAGCTTTCATGGCCTAATCACACGTCTGCAGGTAGTGCTTAGCGAGATCGACTACGCGCAAAAAGCTTGTCTTCAAGCGGGTAAAATGGAGTGCCAATTGCTAAACCACCTGTTCAAGGTGAAAACACCTGTTAACATGAATGAATTGGCCAGGGTTCTCAACGTTTCCCACAGCCGCATCACCCGTATCATGGATAATCTGGTGAGCAAAAAACTGGTTCAACGCAAGCCATCTGAGAAAGACCGCAGGTGTTGGTTTGCCATCATTACCGACAAAGGTAAAAAACTGGCAGAAAACAGCCAGCAGACCATTGTGGATCAGCAAAAAAAGATTTTGGCGCGGATCCCGGACAAAGATGTCGAAGGCGTTTACAAAGCGCTG…
4420	c_000000001117	6731	6971	r	Glutaredoxin	PF00462	ATGAACAAGAATATAGTTGTTTTTGGAACGCCAACCTGTTCCTGGTGTACAAAAGTAAAGGATTACCTTAAATCTAAAGGTTATCAATATAAATACGTGGATGTTTCCCAAGATGCCAGAGCTCTCGATGTAATGCAGAGAAAAACTGGTCAGATGGGCGTGCCCCAGATCTGGATAAATAATACGGCGGTGGTCGGTTTTGACAGGGTTAAGATCGACCAGCTGTTGCAAAGAAAATAG
4421	c_000000001117	7317	8280	f	KaiC	PF06745	ATGAAGGATATCAAGAAACCGCCCCTTGCCAGAATACCCACCCAGATCGGTGAGTTTGACTTGGTGATCGGGGGCGGGATCGTGAGCGGCATGCTGGTGTTGATCGGGGGCGAGCCCGGTATCGGAAAATCCACTCTGATGATGCAACTATCGCAATGGATGGGTGTCCAAAGCAAGAAAGTGCTTTATGTGTCGGGTGAAGAAAGCCCGGAACAGATCAGCCTCCGCAGCGCCCGGCTGGGTGTGGACAGTGAAAACATCTGGCTGCTCTGCACCAACGACGCGGAGCATGTGATTAATTCAGTTGAGGAAAACCAGCCCGACATCCTGATTGTGGACTCCATCCAGTCTGTGAGCCTGCCCAGCCTGGATTCGGTACCCGGCAGTATCACCCAGCTC…
4422	c_000000001117	8228	8540	r			GTGGAGACAGGAGAGAGGCGTTCCGCGTCAACTTTCTCAGCGGGCATCGCCAAGGCAGGCATTGTAGAGTTCGCGAACATCTTTGATTTTGGTTACCTTGTTGCGCTGCCTGGTTTTGGCATGGCCAGAAACAAAAATTCTGTCGTAACCCAGTTTGGTGGCTTCGTTGATCCTCTGATCCAACTGGGGGACTGGCCTGATCTCTCCGTTGAGGCCCACCTCGCCGATGAATACTGCTTTGTCCGGCAGGGGCTTGTCTTTCAGGCTGGAGATGATGGCAGCCAGGATGGCAAGATCGAGGCTGGGGTCTGA
4423	c_000000001117	8870	9302	f	7TM-HD extracellular	PF07697	ATGAACTCAAAATACTTGTTGATAATAATAATTGCCTCACTGTGCATTGTGGGACTGTACCAATGCTCGGTGGCAGGCAAGGCAAGTTATCCGGAATACAGGGTCAACTTGGGACAGGTGGCAGATTTTGAACTGCGTGCCCCTTTCGATTTCCCTCTGTTGAAAAGCGAAGAACAACTCGAGCAGGATCAAAAGCAAGCTCTGGACAAGCTGGAAAAGCCCTATTATCTGGATATGGATATCCTTTTCGCGGCGCATCGCAACATCGATGAGCTGTTTGAAACGCTATACACAGCCGCGGAAGATGGAAATATCCGTGCCTTGCGCGACAAGGTCCAAAAATCCGGATACCTGCTGGATGAGACATCCTTGAAACTGGTTACCAATCCCGCGCGCTGG…
4424	c_000000001117	9699	10965	f	HD domain	PF01966	TTGCTGGGCTTTACGGGGCTGTTGCTCTATGTATTTGCCATCCTCTTCGCCTTTACCTATCACTATCAGAACAGCGAACTGCACACCAAGGAATCCGGCCCCAGCTTTATTACTTTGGTACTCGGACTGATTCTGGGTGTGTTGCTGGCTTTGCTGTGCAATCTGCTCGGCTTGGAAAGCAGCCTGATCCCCTTTGCCATGCTTAGCATTGCGGCAGCTTTGCTGCTTGGTTTCAATTTCGCCCTGACCTTTTGCCTTAGTTCGTTGTTGCTGATTATGCCATTTATCAATTGGGATGCGGAGGGAGCCATCATTCTGCTTCTATCATCATTCATCTTGTTGGTGATGATCAGGGTGCAGCGCACCCAGCACGAGTATCTGCGAATCTGGCTCTATCTC…
4425	c_000000001117	10961	11408	f	Uncharacterized protein family UPF0054	PF02130	ATGACAGACTGCCAATTCAACCTGATAAATCAAAGCGGGTGCGAGGTCAACGAACAGCTCTTGAAAAGTTGCTTTCAATTGGTCTGCCAAGGTGAATCCCCACGCCAGGGTTTTGAACTGAATCTTGTTCTCTGCACTGATAGGGAGATGCAAAAATTCAACCGGATCTACCGGGGCAGCGAGTCGGTCACCGATGTTTTAAGCTTTTGCTCCCAGGGCAGCCGGGATCCTTCTCTGCCCGCATCTATTACCCCCAGTCATGATATTATCATTGACACAAATCAGATTGACAGGCAGAAGGGAAAAAAGAGTTTTGAATGGGAATTGGTGAAGGTATTTATCCACGGATTACTGCATGTCTTTGGTTATGACCACCTTCGCCATGAAGATCGTAAAGAA…
4426	c_000000001117	11380	11677	r			TTGTTTCTGTCGGCTATTCCGATAGCGATCAGGGTTGACAGCGAGGAAATACCCATGTTCACAAAGGTATTGCCAAAGAGAATGGTGACAAGCAATTGTCTTGGTTTGCCCAGCAGGGAAAGAATCCTGCGGGACTGCGCCGTCTTTTTGTTTTCCAGTTTCTTTAAGTATATTCTGGAGAGTGAAAAAAACGCTGTTTCCGAACCTGAAAAAAAGGCGGATAACAGCAACAATAAAATCAGTATAAACGCTGAGCCGTCGTCCAAAGCTTACTCACCTTGTATAATATTATTGTAA
4427	c_000000001117	11739	12675	f	Transporter associated domain	PF03471	TTGGAGAAATCCTGCCTAAAACTGATCGCCCTGGCAACCGCAACTGGCTTTGCCAATCTGGCAAGCCTGCCCCTGCAGCTCATCAGCTATGTGCTGCATCCTCTGGTGTGGCTGGTGGACCGCTTCAGTTTGCTGCTTTCAAAAAAGCAACTGGATGACAAACATCTGAGCAGTAAATTTACCACTGAGGAGTTCCATAACCTGATCCAGAGTGAGAGCTCACACAATAGCTTGGAAGAGCACGAGAAAAAGATTCTGGTTGGCTTGTTTCGCTTCCGGGAAGCGGAACTTACCGAGATTTACACCCCCCGCGTAAAGATAACTGCCATCGAGGAAAAGCAAAGCCTGGAAGAACTGCGCGACCTTATCCTTGCCACTGGATACTCCAGAATTCCGGTT…
4428	c_000000001117	12664	13381	f	Protein of unknown function (DUF3108)	PF11306	ATGAGTTGTAAGAATCTGGCTTGCGCCATCCTGTTTTGCATCTGTGCAGTTCTGTTGCCGGGATTGTCTCTTGAATACGATATCAGATCCCTCGGGCTCAAGATAGCCGATCTTAGCCTCAATTGCTCGGTTGCGGATGGATACATTGAGGCCTCGGCTGAGAGCGAGGAAAGCTCAGCATTTTTCCCCAGTTTGGACAACCAATACCGCAGCGAGTTCGATGAGAACTTCCTGCCCCGCAAATATCTGCGCAAGATCAAGCAAACCAAACTTTCGGACCAAGTCGAGGTCAGCTATTTCCACTTCGCTCATTACGCCAAGGTTAATCAGCAAAATGGCAAGCGAAGCTTCAGTTATGCTGTCGCGGACAGCACCCGCGACATCTTCAGCCTGCTGGCC…
4429	c_000000001117	13380	13584	f			ATGAAGAAAATCAAACCCGTGTATTATTATCTGGCAACCCTGTGTTGGTGGGCCGCGATCTGGACCGCGTCCTCAATCCCAACCAACAAACTGCCTTCGATAAACATCCTTGGCTGGGACAAGCTGGCGCACACAGGTGTGTATTTTGTCCTCGCCCTCTTGGTAAACAAAAGCATGAAGCTTCTGGGTGTATCCAGGAAAAAA
4941	c_000000001245	2	587	r	Poly A polymerase head domain	PF01743	TTGACTCTGGAAGAACTGCGCCTGCGCCTGGCGGAATGCATCCGCGGCACTGAGTTTGCCGGGCGGACCTGGTTTGCCGGAGGCTGTGTGCGTGACGAACTGTTGGGGGGCCAGCAACGCCTGCTGGACGCCGATCTGGTTGTGGAGCTTCCGGAGGGAGGGCTGCGCCTGGCTAAGTTGCTGCGCGATCGCTTGCCCACCTCGGAACCCGATCTGGAACAAGGCTTTGGCACTGCCAGCGCCAGGTTTGGCGAATTGCGCCTGGATTACGTGATGACCCGCAGCGAGGCCTATTGCACAGGCAGCCGGCATCCCCGGGTGAGGTTCGCGCCGCTGGAAAAGGATTGCCGGCGCAGGGATTTTACCATCAACGCACTCTATCTGGAGATCATGGAAGGC…
4942	c_000000001245	583	814	r	HemN C-terminal domain	PF06969	ATGCGGCACGGAAAGGACGGCGCGGACTATCTGATGATGGGTTTGCGCCTGATGAAGGGAATCGATCTGACGGATTACCAGGCCCGCTTTGGCAGAGACCTGGCCACGGAAAAAGCCGGGCAACTGCGCAAACTCGGGGAGCTTGGGCTGCTGGAACTGGAGCAAAACACCCTCCGCCTGAGCCAGAAAGCGCTCTTTGTTTCAAACTCGGTGATCGGAGAACTGCTTTGA
4943	c_000000001245	844	1402	r			TTGCAAGCCCTGCGCGCCACCCCGGTCAACCGCCTTTCCATCGGCGTGCAGAGCCTGGACGACAGCAACTTGGAGTATCTGGGACGCAGGCACCGCGCCGCGCAAATCCCGGGCAAGCTCGCGCTCTGCCGCGAACTTGGCTACCACAACATCTCTCTCGATCTCATCTACGGCCTTCCCGGTTCCTCTCCCGGAAGCGTTTCCCAAGAGGTGGAACGCTCGCCCCGGCTTGCCCCCGAGCACCTTTCCTGCTATCTGCTCAGCCTGGATGAAGGCTCCCCCCTGGCGGCCGGGATCGCGGCGGGCGACTCGGCTCCCTTGCCTCCGGACGACCTGGCGGCGGATGAATACGCGGCTCTGTGCGAGACGGCCTTGGAGCAGGGCTTCCAGCAGTATGAA…
4944	c_000000001245	1694	2207	r	Signal peptidase, peptidase S26	PF10502	ATGCACATCAGCTATTACGCCCGCAAGAATGTGGTCAAAAGGGTGATCGGCATGCCGGGGGACATCGTGGAACTGCGTGACAAGATCGTCTATATCAACGGCAAGCGCTTCGAACGGGGCTATGAATGTTACGACATTCCCATGCCCTCGCCGCCCCAGTCCCCGGTGCAGATCATCCCGCACCGTTTTGCCTACGGGCAGGATGACTACGCCATTTCCCGCAGCGACTGGTATGAACCCTATCGAGTGGAGGTGGCGGACAGCAGCGGGACGCAGGCCAACAGAATCTTCAACCGCGACTGGTTTGGCCCCATCAGGGTGCCGGAAGGCAAATACTTTGTGCTGGGCGACAACCGCGACGTGAGCGAGGACAGCCGCTACTGGGGCTTCCTTGACCGC…
4945	c_000000001245	2277	2634	r			ATGAAAGATAAAGCGATCATCCGCAACCTGCGTAAAAAAATAGAAAGCGTCAGACCTGACTACACCATCACGCCCATCCCCGAGGGCAGGAAGTTCCGCAGGCGCAAACCCTGGCTGCAGGATTGGATCGAGGCCATCCTCTTCGCCTTTGTGGTGGCGATGATCATCCGCAACTACACCTTCCAGAACTTCATGATTCCCTCTCCCTCGATGGAAAAGACCCTGCTCACCGGAGACTACCTGGTCGCCAACAAGCTCAAATATTACTTCACCGACCCCAAAACGCGAGGACATCGTCACCTTCCGCTTTCCCAAGCTGGAAGAGGGCACTCCCGAACACCCGGACAGCAAGGATAA
4946	c_000000001245	2816	3107	r	Iron-containing alcohol dehydrogenase	PF00465	GTGATCTTCCCGGCCTGGATCGAGTATGTAAGCGAAAAATATCCGGATCGCTTCACAGGCTGGGCCAGGAATGTCTGGGGAGAGGACAGCGTTCCCTACGCCTTGCGCCGCTTTCGCGAAAAGATCGAATCCTGGGGTTCATCCACTTCGCTGCGTGACTTGGGTATCAAGGAACAAGACCTTGCCACGCTGCGCGATATCATCCTGCAATCCGGCACCATCGGCAAAATCCACCAGTTTTGGCGCGGCGGATATCGAAGCCCTGCTGATGCTGGCCTATTAGGAGAGTAA
4947	c_000000001245	3103	3730	r	Iron-containing alcohol dehydrogenase	PF00465	ATGATCCAGGTTGCCCGCCGGGAAGGGGTGGACGCGGTTCTCGCGGTGGGCGGCGGTTCTGTGATCGACAGCGCCAAAGCGGTAGCGGCGGGCTTCCATCTGCAGGATGTCTGGAATGCTTTCACGGGCGCTGAGCGGATTCAGCAGGCGCTGCCCGTTTTCACCGTGCTCACCATCTCCGCCACCGGCAGCGAGATGAACGGCAACGCGGTCATCACAAACAGCGAAGAAAAGAAAAAGTGGAGCATAGGCTCCACGCTGCTCTATCCCAGGGCAACCATCATCGACCCCTCCGTGCAAAGCAGCCTGCCTTTCAAACAGACGGTCAACGGAGCCCTGGATGCCACCGCGCACATCCTGGAATACTATTTCATGGACGACAACGCGATCGCCACCCTG…
4948	c_000000001245	3731	3896	r	Iron-containing alcohol dehydrogenase	PF00465	ATGAGCGCCGCCGGAGTGAAGAAATGCCTGCTGGTGGCTGGCGGGGGTTCCATCCGTGCAAACAGCGTTTACAGCCAGGTGGTGGAAAGCCTGAAAAGCAGCCATATTGACTGGATCGAGGCCTGGGGCGTGCAGTCCAATCCCACTCTGGCAAAAAGTGCGTGA
4949	c_000000001245	4184	4904	r	Enolase, C-terminal TIM barrel domain	PF00113	ATGCCCTCAGAGCCATCCTCATCAAAACGCGGTCTGGCCACAGGCGTGGGTGACGAAGGCGGTTTCGCGCCGAATCTGGATTCCAACGAAGCGGCTCTGGAAGTGATCGTGGAAGCCATCACCGCCGCCGGATACAAACCCGGGCAGGACATCTATATCGCCCTTGACGCCGCGGCCTCCAGCTTCTGGAAAGACGGCAAATACGTCTTTGAAGGAAAAGAGATGAACAGCGACGCGATGATCGCCTATTATGAGATGATCGCGGAAAAGTATCCCATCGTCTCCCTGGAAGACGGCCTGGCAGAAAACGACTGGGATGGCTGGAAGCAGCTCAACGCCAGACTGGGTAACAAGATCCAGATCGTGGGCGACGACCTCCTGGTCACCAATCCCCAGTTC…
4950	c_000000001245	4851	5463	r	Enolase, N-terminal domain	PF03952	ATGTCATCAATCATTCATATTTACGGACGTGAAATACTGGATTCACGCGGCAATCCCACCGTGGAAGCCGATCTGCACCTGGAAAGCGGGGTGATTACCCGGGCTGGAGTGCCCAGCGGCGCGTCAACCGGAGAACGGGAAGCGATCGAATTGCGCGATGGGGACAAATCCCGCTATGGCGGCAAAGGCACCCTCAAAGCCGTGCAAAACATCAATGATAAGATCGCCCCCGCCCTCATCGGCATGGAATCCACCGCCCAGTCACATCTTGATCATATCATGCTGGATCTGGACGGAACGCCGAACAAGGCCAAGTTGGGAGCGAACGCCATCCTCGCCGTTTCCATGGCCGCCGCCCGCGCCAGCGCCATCGAGCTTGACCTCCCCCTCTACCGCTAT…
4951	c_000000001245	5488	5764	r	C-terminal region of band_7	PF16200	GTGGCCGACGGCGACAAGACCGCCAAGATCACCCGCGCCGATGGCGAAGCCCAGGCTAAGCTGCTGGTTGCTGAGGCCGAGCGCAAGGCCATCGAGCTGATTGCCGAGGCAGTAAAAGGCACCGGCACCGATCCCGCGCAGTATCTGGTAGCCCTCAAATATGTGGCGGCCTTTCAGGAAGTGACCAAACAGGGCGACAAAACAGTTGTGGTTCCCTACGAATCATCGGCTCTGCTCGGCTCAGTCAAAACCCTTGCGAACATTTTCAAAGAATAG
5241	c_000000001314	67	322	f			ATGACCCAACTGGTATATTATCCAGAGGCAGCCCTGGCTGTCCACTACAGCATTAAGGAGTATTCAATGCCAAAGGTGTTAATCATCCTCATCAGCCTGCTGATGCTGGCCTCCACGGCCTTCGCGGAAGACTGGATAACCATCTACAACGACGACCTTTCCCTGGTGCGCAGCAATTTTGAACTGGATCTCAAGCAGGGAAGGCAGGAGTATAACTACGCGACATCACCAGCCGCATTTCCTCCGAATCCGTGA
5242	c_000000001314	318	615	f			GTGATCGTGAAATCGCTCAACGGCGGCGTGCAGGTGGCGGAACAAAACTACGAATACGACCTGGCGGGAAAGCGCCAGATCATTGCCAAATACATCGACCGCGAGGTGGAACTGCTCACCAAGGACGCCTCCCGCGTCCGCGGAACCCTCAAGTTTTACGACGGCAGCAGCTATGGCGTGCTGGAAAGCGGCAGCAAGAAAACTGCTGGTGGTAGCCGACTCCGAGACCCAGATGATCCAAACTGGCGGAACTGCCCTCCAATTTCTACACCAAGCCCACCCTGCACTGGAGCCTGA
5243	c_000000001314	719	1121	f			ATGGATTCCTGGGTCACCATCCGCAACACCAGCGGCAGGGCGTTCAACGACGTCAACCTCAAGCTGATCGCGGGGGATGTGAATGAGGTGCGGGATGAGTTTTCCAGCTATAACCGCAAATACGCCATGCAGATGGAGGCGGATTTCGCCGCCGCCGGAGCGCCCTCCTTCGAGGAAAAGGCGTTCCACGATTTCCACATGTACACCCTGGATCAGAAAGCCTCCTTTGCCAACAACCAGACCAAACAGTTGCAACTGTATCCCACCCTGAACGTAACTGCAAGCGGGGTATATGAATATCCCGTCTTTGGCAGCGCGGTTAAAAGTATGATCAAGTTCAAAAACACCGAGGCCAACGGCATCGGCAAACCCCTGCCCAAAAGGCGTGATCAAGGTCTA…
5244	c_000000001314	1104	1485	f			GTGATCAAGGTCTATAAACAGGATAGCGACGGCAACCTGGAATTCATCGGCGAAGACAGAATCTCCCACACCAGCAAGAATGAAGAGGTTTCCATCACCACCGGAACCGCCTTCGACCTGGTGGCGTCAACCATGGTGAAAGACCAGCGCCAGGTCAGCAAGTTTGTAAGCGAACGTAGCATCCAGGTGACACTGCGCAACAACTCCGACTCCGACAAACAGATCAACGTGATCCACCAACTGGGCGGCAACTCACGCATCACGGAAGTGAAGAATGGCCACAAATACAGCGTGGACACGAACAACAAGGTCACTTTTGAGCTGAATGTGAAAAAAGACCAGCAGCTCATCCTTACTTTTACGGAGCGAACCGAATATTAA
5245	c_000000001314	1509	1950	f	Hsp20/alpha crystallin family	PF00011	ATGCAGGATAATATCATTTCCAACCTCCAGGGCATCCGCCGGCAAATGCTGAAAATCCTGGGGGAAGTCTCTTCCCTCACCAACAGCCCCATGGCGATAGAAGAAGCCATCGATGACTACTGGCATCCCAAATGCGATGTGTTTCAGACAGATACGCAGTGGATAGTGGTGGTCGAGCTGGCCGGTGTGGAAAAGGACGAGATCATCATCTCCGTGACCCCGGAGTTCTTGCGCATCAGCGGCTTGCGCAATCTGCACGAAGACAATGCCCATGCCTTTTACCACAGCATGGAGATCGAAACCGGACGTTTCGACCGGCGCATCTTCTTCCCTGATATCAGCATCGACAAAGAAAATCCCAAGGTGCAGTATCACAATGGGATACTGAAAATCAGTTTT…
5246	c_000000001314	2283	3135	f	Acetokinase family	PF00871	ATGAAGATCCTCGTGGTAAACTGTGGCAGTTCGTCACTCAAGTACGAAATCTATGAGATGCCCTCCCAGCAAAGCCTGGGCAAGGGTCTGGTGGAGCGGATCGGGCTTCCCTCCGGAAATTTGACCCAGGAATATGGCTCCCGCGTGCTGCACCGGGAACAGGAGATACCCAACCACCGGGTGGCTTTCGAGATGATGATGGAAGCGATCCTGGACAAAGAACAGGGCATCCTGAAAAGCGTTTCCGAGATTGCCGGCGTGGGACACAGGGTGGTGCACGGGGGAGAACAGTATGCCTCTTCCGTGCTGATCGACGAGCAGGTGATGCAGGCCATCGAGGCAAATTGCGAGCTGGCTCCCCTGCACAATCCAGCCAACCTAACCGGCATCCGGGAAAGC…
5247	c_000000001314	3175	3478	f	Acetokinase family	PF00871	ATGGCTTTGGATACCTACGCTTACCGCATCCGCAGATACATCGGGGCCTATGTCGCCAATCTCATCAAGGTGGATTTCATCGTCTTTACCGGAGGCATCGGGCAGAATGGCGTGAAGATGCGCCACCGGATCTGCAACCGGCTGGAGAATCTGGGCATCCATATCGATCCCCAGAAAAACATCGACGTGGGCAGCAAGGCCGGCATCATCTCCCAGCCCTATTCGCCCATAACGATCCTGGTGATTCCCACCAACGAGGAACTGCAGATCGCCATTGACGCTTATGACCTGATCAACAAATAG
5248	c_000000001314	3620	3737	f			ATGCGCCGCTTGCTGAACTTGCTGTTGATGCTGAGTGCGGGCCTGTGTGCCCTGAAGGGAGAGGTGTTGTCCGTGACGGCGACCGATCTGGAAGATAATTGCAGCCGGGTCAGCATA
5281	c_000000001324	0	1674	r	Cleaved Adhesin Domain	PF07675	ATGAGCTTCAAACTCAAACAACTGCTACTCCTGATGGTATTTTCGGTTCTGGCGCTCAGCGCTTGGGCTCTGGTTAGCGAATACTCATTCTCGCAAACCAGCGGAACCTATACTGAAATCACTGGAGGAACAGTTCTCGGCACCAACGCGAATGACAACGAATGCTTCAATGCCATTCCCTTGGGATTCACTTTCACCTACAACGGTGTTGACTACAACGAGGTCAGCGTTCAGACAAACGCTTTCATCGCCTTTGGCTCCACCGTCACAAACAGCACCATGGCCATCAGCAGCAGCACCGCCACCAACAATATAGTGGCTGCTCTGAACAGGGACATCAAATCCCGCGACAACGGGGAACTGAGCTATCTGCTCAGCGGAACTGCGCCCAACCGGGTC…
5282	c_000000001324	1956	2919	f	Phosphofructokinase	PF00365	ATGAAAGAATACATTTGGAGACAGGCGATGAAAAAGCGACTGCTGATTGCCACAGGAGGAGGCGACTGTCCGGGGCTGAATGCGGTATTGCGGGCGATAGTAAAACGTGCCCAGAGCGAGCCCCAATGGGAAATACTGGGCAGTATCGACGCCTTTAACGGCATCCTGCTGGACCCCATGCGGCTGGTGGAACTCACCCCCAAGACCGTAGCCGGAATCCACGTGCAGGGCGGCACAATCCTGGGCACCACAAACAAAGGCGGCCCCTTCAACTGGCCTGTGCAAAAAGCGGATGGCAGTTGGGAAACGGTGGACCGCAGCGCGGATTTCATGGAGCGGCTGCGGTATCAGAACATCAATGCCGTCATCAACATCGGCGGAGACGGTTCGCAAAGGATT…
5283	c_000000001324	2920	3079	f			ATGGTGCTGGCCGGACAATGGGGGCAGATGGTGTCCTACCGCCATCCGAACATCGTGTCCGTTCCCCTGCGGGACGCCATCAAGACCTACAATCTGGTGGATGTGGACTCCGACCTGGTGAACACCGCGCGCGGACTGGGCATTTCGCTGGGAGACTGA
5284	c_000000001324	3100	4396	f	Nitroreductase family	PF00881	ATGGATATGAAAAGCTTTGAATACCTCTACCACAAAGCGCGCGGCATGGACCGCGAGCGGATAGCCAGGGAGACCGGCCTCAGCGACGACGAGATCGACATGATGGAACAGAGCTACGCCCCGCTGCTGCGCGAGATAGCCGCCGAGATGCCCCAGGCGGCGGATATTGGCAAACGCTTTGTGCGCCTGACCCGTTACATCTATGCCAACCGCGCCGACCAGGAGCTGGACATGCCCCGCCCGGATGCCGTAAAACCCCGCGAGGGAGAGATGATCGCCCTGCCTGGCACCAGCAAGATCGCCATACCTTCCATCTCCTTGCATCAGGCCATCGACCAGCGCCGCAGCCTGCGTAGCTATTCCGACCAGCCTTTCAGCCTGGAAGAGCTGTCCTTCCTG…
5285	c_000000001324	4392	4794	f			ATGAACTCACACCGCCGGGCTGGAAACCGCGGGCCAAACACCGGGACGGTGAACAACCTGGTGGTCTATATCCGCTTTTCCGACCAGACAGAGTTCGATGAACCCCGTTCCGCCTATGACGCCAAATTCAACGCCGTGGGCGATAATGTGCATTCCCTGCGCAACTATTTTCACAAGGCGAGCTACAACCAGCTCAACTACGTTTCCCATCACTATCCCACCTGCGAGCCACAGCTAAACCTCTCTTACCAGGACAGCCATCCCCGCGCCTATTACATGCCCTACAACAGCATAACCAACCCTCTGGGCTACCGCGACTGGCAGCGCACCGAACGCGAGCACACCCTGCTTGCCAACGCCCATAAACGCCATCGCGCCCCCAAGTGCCGGCCGATCTGG…
5286	c_000000001324	4775	4865	f			GTGCCGGCCGATCTGGTGATCGATGCCGACGGCGACGGCTATGTGGACAACGTCTGCTTCATCATCCGCGGACCCCACACCGCCTGGGCG
5367	c_000000001346	0	621	f	RAMP superfamily	PF03787	AATCCCATTTCCGGACTTCCTTATATTCCTGGCTCATCGCTTAAGGGGAAAATGAGATTCTTGCTTGAACACTATTATCAAGTGGTACCAAGCAGTGGAGATATATCATCACCAATGCACAATGGGAAAAGAAATGAAGTGGCGATTGTCTTTGGCCATATGGAGCATGCGAATCTAAAATTCCAATCATACCCAACCAGAGTGATATTTAGGGATTCTAACATTACAGGAGCAGTCGAAAACATAGGAAGCTGTGAAGGACCGGTTCTGACTCAACCTGTGCTGGATATAGCTACTGCAAAAATGAAGATGAACTCACTATTTGTTGAAGGCAAGACTGAGGTGGCCATCGACCGCAATACAGGCACTGTTAAGCAGAAGGGAGGCGGTTTGCGTCAG…
5368	c_000000001346	719	1589	f			TTGGCCACAGAGTTTGGGGAGGAAGAACTGCTGGAGTTTCTGGACAAGATGCGCGAGCCGAAGCTGCTGCTCTCCTCCGCCTTCCCCAAAAACACCTTGCCACTGCCCAAGCTCAAGCCGTTCTACGAGAAACTTCCGCCAGACCTGCCCGGCGCGCTGCTCAAGCGCAAAAAAAGGAAAGACGCCAAAAAGCTCAGCTACCTTCCCATCGAGATGTGGCTGAACAAGCGGCAGGACTATGTCCACAGCGAGGCGTTGGAGCAAAACGAGGCTATTACCGCCATGCTGGAGGAAAGTTTCAAGCTCGAGAAAGACTTGGTGACCCACAACAGCATCAACCGCATAACAGGCACCACCACCAAGGGCGGGGCAAGCCTCTACGCGGAAACGGTCACCTTT…
5369	c_000000001346	1581	2607	f	RAMP superfamily	PF03787	ATGCCTGAACTCTGCAAACGCTGGCGACTGAATATCCGTCCCATCACGCATCTGCATATTGCCTCGGGGGAATGGCTGGACCCCACCCAATATGTGATTTCCGCCAATAACTTCTACGTGCTGAACCAGCCGCGTCTGGTCTCGCGCCTTAACGCCAAAAACCCTGCACGGCTGCAGGAAATGCTCAAGCTAAGTCACGACAGGATCGCCGCCTTCCTCAGCGACAGCTTCGACCCCTCCCAGGCCGACACCTGGACCCAACGGCATACCGTGGAAGAAAGCTATCAGAAACAGTATCTGCGGGATCTTGGCAACCCCGAGGCGCAGCAACTGGTGGCGGCCTTCATCTCAAACCCGCTCACTGGAAACCCTTACATCCCGGGCAGCTCCATCAAAGGC…
5370	c_000000001346	2603	3704	f	CRISPR-associated protein (Cas_APE2256)	PF09651	ATGAAGTTGATAATTTCCCCGGTGGGAACAAGCACCCTCACCAACCGGAGCGACGACAATGCGCGCAGGCTCTTGGGAACATACGCCAATGCCAAAAGCGGAGAGGAGATCGACCAGGAAGACAGAGACTGTCTGGACAACTACATCGCGCTCCGGAGGCAGGAGATAAGCGCCATGAAAGCGGCTGAGGCAAAAAAGATCTCAGCGGAGCTACACAGTCTTCTAATCCTCTTTGAACAGCAGCCCAAAGAGGACAGGGACCAGGTGGTGCTGATCCCAACCGACACCTATATTGGCAGGATCACGGGGGAGATCATCAAAGACTATCTGGAGTCCAAAAACATCGATGTGCGGATGCTGGAAGTGGCAGGGCTGCAAACAAAATCCAGCGCCGACCTG…
5371	c_000000001346	3713	4199	f	Domain of unknown function (DUF1887)	PF09002	ATGCGCTATCTGCTCTCGCTGGTCAGTGAACAACCCATCCCCAATATCCTGCTGATCAAAACGCTGCGGGATATCGATGGCTACATCTTCGTGTCCACACCCCGCATGAAATCCCAAGCCCTGGTGGAGCGTACCTGCGACCTTTGCGGTATCAGCTCTCCGGTCGTGGTCGAAGTGGATGAATATGACCTGGAGGGCATTGCCGCCAAAGTGGCTGGCTGCCTGCAGAACTTAGGTCCCGACAGCGTGGCGGTCAATCTGACGGGAGGCACCAAGTTGATGGCTCTGGGGGTATATATGGCCATCCAGCAGTATCCCGCCCAGGCTTTTTATCTGCCCCCGGGCTCTGCCTGCGCTCACATCGTTCACCCCTCCTTCATAAAAGACTTTCTGCCCCTC…
5372	c_000000001346	4207	4777	f	Domain of unknown function (DUF1887)	PF09002	ATGTTCAGGCTGCAAGCAGAAGAAAGGATTCCCGAACTGGCCAACAAGCTCAGCCGGCTGGGAAACCGCAGGCTTGACCTTTCGCCGAAGAATATTCAACTGAAGGAAATTCTGGCTTCCACCCTTGGCTTGAAGCCTGAACTGCTGTCTTGCGCAGAATGGCTGAAATTTGTGAAAGGCGGCTGGTTTGAAGAGTATATCTGCCACCATCTGCAAAGGATGCTACCCCAAACGGATGTCTGCCGCAACGTGGTCACGGATAAAAACGGCGTCAAAAACGAACTCGACATCTGCTTTGCCCACGCCAACACACTCTATGTATGGGAACTGAAATCTTCGGTGAAGATCGCTGAGCTCAAGGATATCCTTTACCGGCTGGATTCACTGAAAAACGACTAC…
5373	c_000000001346	4801	6694	f			ATGAATCAAAATCAGAATCAGATCAATGCGACAGACTCTCCTGTCCCCCAAAAACAGGCACAGGAGTTCCATCTTCTGCGCATCAAATTCAACACAGCTTTTCTGAACGAAGATTTCTCCGCGGCAGAGGAGGTTTGCCGCAGTATTGAACACAGCTCCAGCCTCAGCCCATCGGAGAGAGAAGAGCTATCCCGCTATTTTCTCATGCTGGGAAAGGTGCCGGAAGCTCTGAACCAGATCGACCAGGTATTGGAAACCCAAGCAGAAAACCACCTCTTGGCCCGCAAGAAAAGCGAGATATTGAGGCTTAGCGGAGAAAACTCCGCCGCCCGGGATTTTTTGGAAAACAGGCTTGCCCAGTTTCCGCGCAACATCGAATACTATACCGAGTTCTTGTTG…
5374	c_000000001346	6716	7022	f			GTGGAAGAACTATTCAGGCAGGCTTCGGAGCTCAAACAAAATAGCGATTGGCAAGGCGCTCTCGCTGTGTATGAAAAAATCTATGCCGATGAAAGTCAGCGGAACAACCAAAACCTCGTTTTATCCATGCTTTCCTGCCTGAAGAAATTGGAACAGTATGAGCGCGCGATAGAAATAGGATTGCCGGCCTGTGAGTTGGAAGGACGCTGGGATGCAGTGGCCAGCCTCACTGCCTGGTGCATCTATTTCCACCACTTTCAAAAAACCACGCCAGTTATCTGCCGAACAGGCTGTGGAATGGCTTGA
5375	c_000000001346	7444	7996	f			ATGAAGCCGCGTTGGCAGCCTATCGGCTGGGACAGACAGACCGCTCTCTGGAGCTGGCTTTACAAGCGGCAAACGCATACGGGGGACGCCGACAACAAGATCCACCTCTGGGAACTGCTGCAAAACCTGATGGCCATAAAAAAGGAGTTTGATCGCTCCATTGCAATGCTCAAGCTCTGTGCCGCCATTCGCAAACAGAGGAATTGGCGGATGGACAACAATCTGATCATGGATCTTAAAGCTCACAACATCGATCTTGACAGTCTCCCTCCTTACAAGGTAATATTGAGAGATTGCCAGGCCTGGATGAGGCCGGGGCAGCCCATTGAACAGAATAACCTGCAGGGCAGGGTCTCCAATCTGCTTCCCCACGGCAAAGCCGGCTTTATCAAGTCGGAA…
5376	c_000000001346	7992	8571	f	CRISPR associated protein Cas1	PF01867	TTGATAATGCCAGTGGTATATGTGGCGGACCAGGGTTGTTCGATATCCAAAAAAGGTGACAGGCTCTACGTTTACAAGGGAATAAACTTATTGCGCTGGTTTCACACCAAAGACATTTCCCAACTGATAGTCGTGGGCAATGTCGCAATCAGCTCCCCCGCCCTGACATATCTGTTGAAGCACAAAATTGACACAGTTTTCCTCTCTTACTACGGAAAATACAAGGGGGCGCTGGTGGGGGAGTTTGGTAAAAATGTCGAGCTGCGGGTAAACCAGTACCACTACTTCTCGGATATCGCCAATAGGGAGCAACTGGCATCAGCGTATGTCGCGGGGAAAATCCAAAACATGCAGACACACTTGCAGAAAAGGCTGAAAAGAAACAAACACCCCCTGCTC…
5377	c_000000001346	8608	9043	f	CRISPR associated protein Cas1	PF01867	ATGAACCAAGTCATGGCCGCGGCAAACATTGTGGGGCTGGACCCATTCATTGGGGCGCTGCACGATTTATCCTACGGCAGACAGTCTCTGGTGCTTGACCTCATGGAAGAATTCCGCCCTCTGGTTGACAATCTTGTAATATCACTCATCAACCGCAAAGAGATAAGGATGGAACACTTTGCCTATAACCTCATTCCGGATGAGGAAAGCACAGCCGAAGATATCGATGCGGACACAAAACTGCTGCCTGTATCCTTAAAACCTGATGGCATGAAGATCCTGATAACTTCCTTCGCCAAACTGGTAAACTCACGCTTCACGCTCAAAAATCCAGAAGGCGACTGGACTTTGAGGGATATCTTTGAGCTGCAGGCGCGGCGCTTGGTGAAACAGATTCAG…
5657	c_000000001415	0	249	f			ACCTATTACTTTCCTCCCTGCGGCGGAGCTTCGGTGCAGCGCTGGCTGAAGTGGCTGCCGGAGCTTGTGCGTCTGGGTCACGAGATTACCGTTATCACCACCCTGAATGGCGATTATCCGGTTTTGGATGAAAGCTTGCTGAAAGAAGTTCCCAAGGAAGTCAAAGTGCTTCGCGCACCATCCCCAAGCCCGGGTAAGCTGTGGAAACTACTGTTCGGAGCCAATAGCCGTTGCCCCATGGCAACCTGA
5658	c_000000001415	230	911	f	Glycosyltransferase Family 4	PF13439	TTGCCCCATGGCAACCTGAATAACTCCAAAGACAGTGGATTCCTGCGCAGGGCAATAGTATGGATCAGAGTCAACCTGATCATTCCCGATTTGCGCAGGATATGGAATCCCCGGGCTTATAAAGCGGTAGTTGAACACCTAAGAAACAAACCTACAGACCTGGTAATCACCACAGGTCCACCACATTCCACGCATCTGATCGGATTGAAACTCAAGACCAAATATAAACTCCCCTGGGTCGCTGACTGGAGAGACCCCTGGACGGGTATTTATTACCTGAAGTTAAACCCACCCTGCGCTTTGAGCAGGAAGATAAATCTTGGGCTGGAGCGCAAGGTTGCCAATAGCGCGGATATGAATATCGTGGTCTCACAGCATTTGGCCCGACATCTGGGAACA…
5659	c_000000001415	882	1263	f			TTGCGAATTGTGGATTTTATTCCGCATAATGATGCCCTCAAGGAAATGGCCGATGCTCATTTATTGCTGTTGCTGATCAACTATTATGAGGGATTTGAGGGCATGTTGACCACCAAGCTTTTCGAGTATCTCGCCAGCGGGGTGGAGATTCTTTGCCTAGGCCCGCGTGGGAGCGAGGCTGAGCAATTGATCGATACCTACCAGGCAGGACAGTGTTTTGACCTGTCTGAGGCAGAAACCGCGGCTCTGTTTATAAACAACAGCTATCGGGCCTGGCAACAGAATACGAGGACAGTTAGAAGCATGGATATCTCAGCTCTAAGTTCGCAGCAACAAGCTCTTAGCTTGAACGATGTTTTGCTTGGGCTAAAAAAACATTGA
5660	c_000000001415	1320	1575	f	Ribosomal protein S20	PF01649	ATGCCCCAACACAAATCTCCAATGAAACGAATGAAGACTGATGCCAAGCGTCAAGCTCGCAACAACTATGTGAAACGCACACTCAAAACTCTGGACAAACAGATCCGTTCCGAAATGCCTGCCGAAGAGAAGCAGGAATTGCTGGACAAGATCTATTCGCAATTGGATAAAGCTGCCAAGAAAGGTGTAATTCACAAGCGTACAGCTTCCAGACGCAAAGCGAGAGTGGCTGCATACATTAATAGCCTTAAATAG
5661	c_000000001415	1664	2339	f	Transglycosylase	PF00912	TTGAGCAGTATGAAACGTAAGCGCAGCTTCATTACCAGAGTCTTGCGTTTCGTTTGGAAGACTCATCTGTGGTTCTGGGGCATAGTGGCCCTTCTCAGTATCGTTTACAGTTTCGTTAACCCGCCTGTCACCCCTCTGATGCTGCAACGGTATCTGATCCGGGGCTACACTTGGCACAAACGTGAGTTTATCAGGCTGGAACGCATCCCCAAGCGCACAGTAAACATGACTATCGCGCTTGAGGATGGTAATTATTACAAACACTTCGGCTTTGAATGGAAGATGGTAAAAGAGGCTTGGCAGAAAAACAAGAAGTCTGGCAGGATCCGCTTCGGGGCAAGTACCATCAGCAACCAACTGGCACGCACCATATTCCTGACCACAGACCGCAACTATCTG…
5662	c_000000001415	2335	3352	f	Protein of unknown function (DUF2851)	PF11013	TTGACCCAAGAGACTATGGAAGAGCGATTCCTATACCACATCTGGGATGCCGGGCATATGCAAAACGAGCTCAGGACCGTTACTGGCAAATCAGTCCAGGTCAAGTATCAGGGACAGTATAACACCAACCGCGGACCGGACTTTCGCAACGCGCTGATCGAAATCAGCGGTGAACTACTCAGGGGCGATGTGGAGATTCATTTGAACAGCAACGATTGGATCGCCCACAATCACCATGAAGACCACTATTACAATCAGGTAATCCTGCATGTGGTGCTGAATAGTAATGGGAAAAGCCAGACCATCAAGGAAAACGGTGAGGCGGTCGAAGTCCTGGAACTAAAAAACCAGCTTAGCCAGGATATCGAGAAACTGCTTGCAGATCAGAAACTGGCGGAA…
5663	c_000000001415	3767	4265	f			ATGATTAGAAAGTTCATTCTTGTAGCTCTCACGCTTATCATGATTCTGACCGTTACATCCTGCAACAAGGATAAGGGCAAGCTTCCCGACGGCAAGGAAAAGGTGACCGAGTATGCCACCATTAATTCCGTCAAATCGCTGTTCCTGGCCTTGAATAGCGCGGAATACTCATTCCTTAACCTGGGACTTTCCAAGGCAGACTTCAAGGCCAAAGGCGAAGCGGCAGCGGATGCTTTTAACTGGGGTATGGTCAATGCGGACTTGTTGACGGCACTTGCTTCCAATGATGTTAGAAGCCTGCAGGGAATCGCCTTGCACCTGAAAACCCTGTCGCCTACCTTAGCCCTTTCCAATGTAGCTGACGAGTTTGACCAGCGCTCGCGCCAGATTGTAAAGGAA…
5664	c_000000001415	4567	5290	f			ATGAAGTTCGCTAAGTTGATTGCAGTTTGTTTGTTCCTCTGGATATCTGTGGCTGGAGAAGCACAGGAATTTAAGGCCATTGATTATCCCTGGGACAACGGTTCGGCCCTGTTGCTCAGGTGGCAACTGGATCCATCCCGAGATTCTCTCAGTCTGCAAAAGCCTGATTCTTCGGGCGTTTATCGTGAGTTTTTCAACGAATTCAGCCAGTCAGGTGAATGCAAGGACGGAGACCTTGTCGCGGACACACAATACAAGTATCGCTTGATAGCTTATGCGGCTGACCGCTCAGACAGCCTGGTGCTGGAAGCTTCTGCGCAACCCAGGCAGCAGTGGTTTGCGATGGGGAAGCTTTCATTTTTGATCCTGCTCCTTGTTATCTGCGCTGCGATACTATAC…
5743	c_000000001438	1	283	r	UvrC Helix-hairpin-helix N-terminal	PF08459	ATGGATATCTCCACTATTCAAGGCACCGACACAGTCTCTTCGGCAGTTTTCTTTGAAAACGCTAAACCAAAAAAGAAATATTACAGGCACTTCATTATCAGGCAGATCGACACCCAAAATGACTACGCCGCACTTCAGGAAACGATGAGCAGATATTTGCAGGAAGTAGAGAAAGACAAGGATATGCTCCCCGATCTCTTTGTGATTGATGGAGGAAAAGGTCAGTTGGCTGCCTCTGCTTCGATTCTGGAGAACTCGAGTTATAAAGCCATTCCGGTCGTT
5744	c_000000001438	327	1386	r	UvrB/uvrC motif	PF02151	GTGCTGTATGTGGGCAAGGCAAAGTCACTCAAACACAGGGTGAGGTCATATTGGAGCAGTACAGCCAAAGACATCAAAACCAATCACCTGTTAAGGTATATAAATGATCTCGATTACATTATAACACCATCCGAAAGTGACGCTTTCATACTTGAATCAACCCTGATCAAACGGCACAAACCCAAATACAACATCCTGTTAAAAGATGATAAGCGTTATCCCTTTGTCAAGATAACTGTTCAGGATCCCTATCCACGAATTTTCATTACCCGGGAAGTTGTCAAAGACGGCGCAAAGTACTTCGGGCCCTACACAGATGCCAAGTCCTTACGTATTACCTTGCGTAACTTTGAATGGATTTTCCCCATCCGCAATTGCAGCCGCAAAATCCTCTTTGGC…
5745	c_000000001438	1343	1475	r			ATGGAAGAAATTCCGCCGAAAGTAGAAGGCAAACTCAGACTGCTGCCTGATCAGCCAGGCATCTATATATGGAAAGACGCTGAGGATGCGTGCTGTATGTGGGCAAGGCAAAGTCACTCAAACACAGGGTGA
5746	c_000000001438	1450	2146	r	MviN-like protein	PF03023	ATGGCTTTGTTGCCCACCTACTCAAGACTGGTTACTTTGGGCGACTATGAAGAATTAAAAAAAACACTGCGCTTTGCCTCAGTATCACTTGCTTACGCCATCCTTCCTGTAACAACACTGATACTTGCCCTGGGCGGGGACATGGTGCGGATTCTGTTCCAAAGAGGCGCTTTCGATGAAAGGGCCAGCATCATGACGGAGCAGGCTCTTTTCTATTATTCTTTGGGCTTGATCTTTTTCAGCCTGAACCAGACCCTGACACCTTTGTTCTATGCCAATAAAGACACCAAAACACCCGTTAAGATCGCGGCCTGGATGGTGGGCTTGAACATCGTGCTGAACTTCATCCTCATGCAGTTCATGCAACACAGAGGACTGGCTTTTGCCACCACGATCACA…
5747	c_000000001438	2088	2469	r	MviN-like protein	PF03023	ATGCTGGGCGTGGAAGGTGTGGCTCTGGTTAAATGGGCGGCCGTAGGTGTCTTTGGCGGGGGAATGTTGCAGACAGTGGTCAATTTCCCCTATCTGAAAAAGATCGGATATACATTCAGGATATTGCTAAACTTTCACGGTAAAGCCATCAGATCGCTCTGGACACGCTTTATTCCTTCATTGATTGGGGTTGGCATCCGGGAGATCAATCTGATTGCCGACAGCCTTATGGCGTCTTTCCTGGTAGTGGGCAGTATCTCGGCACTGGAGTATGCCAACAGGCTTTTCATCTTCCTCTGGGTGTATTTGCAATCTCAACTGGAATGGCTTTGTTGCCCACCTACTCAAGACTGGTTACTTTGGGCGACTATGAAGAATTAA
5748	c_000000001438	2423	3008	r	MviN-like protein	PF03023	ATGTCGCAAAAGAAACTTGCCCGCAACATAAGCGTGATGTCGTTTGCCATCATGATAAGCAGGGTCTTGGGCTTGCTACGTGATCAGTTGATGGCTTTCTGCTTTGGCGCCTCTTATCTTAATGACGCGTTCGTAGTGGGATACCGTATTCCCAACTTGCTTCGCAGTCTGTTTGGCGAAGGCGCCCTGTCGGCTTCATTTATTCCCATATACAACGAAATTGGTATCAAAGAAGATCAACGTTCCCAGTTCACCTTTGCCTTGCAGGTGCTGTCCATTCTCTCTGCTTTTCTATTGATTCTGACTGTTTTAGGGATTGTGTTCGCGCCCTGGATAGTGAAAGTGATCTTTGCCGGACTTCCTCCCCAAACCTACAAACTGGCAGTAATCCTGACCAGA…
5749	c_000000001438	3016	3883	r	DNA polymerase III, delta subunit	PF13177	ATGAATATTACCGTGGATGGCGAGATCAATAAGAGTGAGGATCAACAGCAATATATGGCATACATCCGCAATAAAATAGAGACTCCCTGGAAAGATTTCTTTTTCAAACGCTCGATAGAGATCAGACGCGACGCCATCACGATGCTGAACAAAAAGCTTGATTTCTCTATCTTTGAAGCAAAATACAGAGTCTGCATCATTGAAGACGCGGATGAGATGAATCACCCAACCGCCAACTCGTTTCTAAAAACTCTTGAAGAACCACCGCCTTCCACTATTATAATTCTGACCACTAACCGGCTTTCGATGTTGCTGCCCACTATCGTTTCACGTTGCCAGCCAATATATTTTGCGCCAGTCTCTCCCCGCGTGATGGAAAGTATTTTGGTGGACAAGTTC…
5750	c_000000001438	3947	4139	r	DNA polymerase III, delta subunit	PF13177	ATGTTTAGAGAAATCAAGGGACAGGATCGCGCCCTTCAGTTCCTGCAACAGGCAATTGCCAGTGACAGGGTGAGCCAGGCGTATTTGTTTCACGGCATCGATGGCGTGGGAAAATTCACCACTGCCCTTTATTTTGGCATGGCGTTGAACTGTCTATCCGAGAGCGAATTCAAGCCTTGTGGCGTTTTGTAA
5751	c_000000001438	4169	4442	r	Acetyltransferase (GNAT) domain	PF13420	AACCTGATCCTGGACTATGGATTCAACGTGCTGAACCTGAACAACATCAGCCTTGAAGTTTTCGACTTCAACAAACGCGCCATCCGCTGCTATGAAAAAGTGGGATTCACCAAGGTTGGCGTCAGGCGTAAATATGTTTATATCGCGGGCAAATATCATGATGTAGTGATCTACGACATCCTTGCCGAGGAATTTAAAAGTCCCTATGTGAACCAGATATTTGAACGCAGCACCAGCGAAGAAGCGGGACGGGGAAAGATCACATTCGGTTAA
6099	c_000000001519	2	1370	f	Subtilase family	PF00082	TGCGCCGGAGCGGTTGGCAACAATTCCATCGGTGTGGTTGGCACCTCGCCGATTGTATCTATCATTTCCTGCAAAGGGGCTTCAAACACCTCTCCATCCCAAGGCATTGCCTTTGCCTACGACCAGGTGAAATACGCCGCGGAAGTGGGCGCGGACATCATCAACTGCAGTTGGGGCAGCGTGGGTACAGGAGCTTATCCCAATTCCATAGTGAATTATGCCACCAACCTTGGAGCTTTGGTTGTAACCGCGGCTGGCAACAATGACATGGAACACAACAATAGTTATCAGGATTATCCTGCTGACTGCACCAATGCCCTATGCGTGGCATCAACCGGCCCGAACGATGTAAAATCTAATTTCTCTGATTATGGCGCGCCAATAGATATCTGCGCCCCA…
6100	c_000000001519	1366	2530	f	FlgD Ig-like domain	PF13860	GTGATCGCATCCCTGCGAAACGATAACTCACGGCAAATCATCACAGCCACCCAGACCGGAAACCTGATCGTCCTAAACAGCGACAACACACCCTATCCCAATTTCCCGGTCAGCATAGGTGGAGCAGTTTTAGGTCCTCCCGCCATAGCGGATTTGAATGGCGACGGCATTCATGAGATCATCGTAGCCACCCTGAATGGCAACTTGTCAGCCATCAACAGCGCAACCGGCCAAAACCTGAACGGGTTCCCGGTTGCGATGCAAGGCGGCACCAAACCCATTACTATCGCCAATCTGGATGCGGACCCCAACCCTGAGATCATTGTCACCACAAGCACATCCGGATACATCCTGGCATACAACCATGACGGTTCACAGTTCTTCCAAAAGGCTGTGGGA…
6101	c_000000001519	2819	3284	f	6,7-dimethyl-8-ribityllumazine synthase	PF00885	ATGAAAGTGATCGAAGGTAATCTGGTTTCCAAAGGATACAGGTTTGCCCTGGTGGCAAGCCGGTTCAACGAACTGATCAGCCGCAAGCTGGTGGAAGGCGCGGTCGATTGTCTGCTGCGGCACGAAGTGAAGGACAAGGACATCACCGTGTTGTGGGTGCCGGGAGCTTTTGAGATACCCTTGGTGGCCCAGGAAGCGGCTAAAAACAAGAACTACGATGCTGTAATCTGCCTGGGAGCAGTGATCCGGGGCGCCACGCCGCATTTTGAATATGTGAGCGCGGAAGTGAGCAAAGGCATTGCGCAGGTGGGCCTGGCCCAAAGCAAACCGGTAATCTATGGCATTTTGACCACAGACACCATCGAACAGGCTATCGAGCGCGCCGGAACCAAGGCTGGC…
6102	c_000000001519	3283	3751	f	NusB family	PF01029	ATGGGCATGCGACGCAAAGCACGCGAACTGGCGGTGCAAACACTCTATGCTCTGGATTTCGCGGAGATCGGCACGGAGTTTAAAGAGTACGATCTCCTGAACCAGTATCCGGAGATTCTGGATCAGCTTGCCCGAAGAGAATCGATCGATGCTTCTTCGCCAGTATTCGCTTTTGCGGAAGAACTTATCAAAAATACGATTATCAATCTGGACGACCTTGAAGCGGAAATTGGCAAACACTCCGAAAACTGGAGCGTGGACAGTATCGCGCATCTGGACAGGCATATACTGCAAATAGCGACTTATGAATTGATTCATACGGACACTCCGCCGGCTGTGGTGATCAACGAAGCGATTGAGATAGCCAAAAAGTTTTGCAGCGAGGGCAGCGGCAGCTTT…
6103	c_000000001519	4019	4889	f	Glycosyl transferase family 2	PF00535	TTGAAACAATCTGAACCCCTAATCTGTTCTTTGGGTGTTTTTGCCTACAACGAGGCAGGCAACATCCTGGCTTTGCTTGAAGCTCTGACCTCGCAGGAACTGCGCAACGTCAAAATAGCCGAGATAATTGTGGTATCCAGCGCCAGCACGGATGGAACCGATGAACTGGTGGCAGAATACTCCCAGTCCCATCCGCAGGTGAAACTGATAAGGCAAGCCCGGCGGGAAGGCAAATCCTCCGCCATCAATCTTTTTTTAGCCCAGGCCACATCTCCCTATTTGGTGGTGATAAGTGGTGACGTGATCCCTGCCCCCAGAACTATCGAACGGCTGGTGAGCGCTTTCCGTGATGAACGGATCGGAGCCACTGGCGGCAGGCCTGTTCCGGTGAACGACGAA…
6104	c_000000001519	4932	6066	f	Radical SAM superfamily	PF04055	ATGCTGAAGCTGTTACTGAGGATAGTAGCCTATTGGTTTATGAAGCATCTTGGGTTTCCGCGGCTACTGCCCATGAACTATACTGTAAGCTTGCTCTACACATGCAATTCCCGCTGCAGCACCTGCAATGTCTGGAAGAAAAAAGCACGTGACTTCAGCGTCGAGGAATATGTAAAAACATTCAAAAGCATCGGCAGGTCTCCCTATTGGATCACCTTCAGCGGAGGAGAGCCGTTTCTGCGGCAGGACCTGGTCCAGATCGTCACCACGATCTACAAGATATCCCGTCCCCGCATTATCAATATACCCACCAATGGAATCCTGACCCAGGGTATTGCCGAAAAAGTGGAAGCGATCGCCAAAGCCTGCCCCAAAGCGCAGATAATAATCAATATCTCT…
6105	c_000000001519	6016	7624	f	PQQ-like domain	PF13570	ATGATCTCGATCAAAAGCAAACTGTCCACCTTTCCCGGCAGCCTCTGTGACTGGCAGGCCTCCCAGGATGGCCACTGGGGATGGTTTGTCTGCATCAGGCATGAAGAACAGGACAGCGTTCTGGAAGAGATCCAGGCGGAAGTGAAGCTGGAAATCATGAATTCGTCGATAGCCAGCGTGAGCCGCATGGAAATAGACAACTGGCTGCGCACTTTTTTTGCCGACTTTCATTGGAAGATGCACGCGCGGCTACGCAAGACTGAACTGCGGGAAAAAGGATTGTCGCTGTTCTTTGGAGCGATATTCGATAGTGAGATTCACTTTGTGCAATTCGGCAGGCTCTTTTGCGCCGTCACCAAGGGTAAAAAGCTTGTCCAGCAAGGTCGCGCCTGGAAGAAC…
6106	c_000000001519	7610	8078	f	Domain of unknown function (DUF4159)	PF13709	GTGAAAGCCGATGAAGCCAGGTTGTTTGAGTATCCCTTTGTGTATCTGACGGGGCATGGCAACATCTCCTGGTCGGACAGGGAGATTGAAAACCTGCGCGAATGGATGCTGCGGGGAGGATTTCTCTACGCGGATGACGATTATGGGATGGATGCTTCGTTCCGCAGGGAGATCAAGCGGGTTTTTCCTGAATATACACTTCTGGAACTGGGTCCTGACCATCCCCTGTTTTCATGTTTCCACCAGTTTCCCGCCGGTCTGCCCAAGATCCATATGCACGATGAAAAGCCTCCTCAGGCTTTCGGTCTGTTCGACGACAGCGGCAGGCTGATGTGCCTCTATACTTACGAAAGCAATATCAGCGATGGCTGGGCTGATCCCTCCACCCACAAGGATCCT…
6107	c_000000001519	8079	8778	f	Calcineurin-like phosphoesterase	PF00149	ATGAAGATCTGCGTTCTCTCCGACATCCATTTCAAATACATTCAGAGCAGCCCTGATGACAAAGCCAACGCCAGGATCGTATTGTCTTTTTTGCGCGAAGCTGTGGGACGCTATGATCTGATGGTGCTCAACGGCGACATCTTCGATCTCTGGTATGACTGGAAATACACCATCATCAAGCAGTATTTCCCTTTGTTGCATCGGCTGGCTGAGATCGGAGAGCAAGGCTGCAAGCTGGTTTTAATAAGCGGAAACCACGATTTTTGGTTCAATAGCTTCTTGCGTGACTATCTGCGGATGGAAATCCACGACGATCTCTACAGGCTGGAGGCGGACGGCAAAAAGATGCTCTTCACCCATGGCGACCTGCACACTGTGAACGACGTCCGCTATAAGATA…
6108	c_000000001519	8824	8890	f			ATGAGAATGCACATTAGTAAGATCGCTTTGGCTGCCTTGCTCCTGGCTTTCAGTTTCACCATGCTA
6596	c_000000001653	0	96	r			ATGGCCAAACAGTCCATCGCCCAGGTAACGCTTCGCTACAGTGAGGCGTTCAAGTTGAAAGTTGTTCAGGAGATTGATAAAGGAAGGTTGACAATA
6597	c_000000001653	425	959	r	NADPH-dependent FMN reductase	PF03358	ATGAATGTATTGATTATTATTCATTCACAGACGGGGAAAACCCTGGGCCTCGCAGAAAGCGCCCAAGCCCTGCTTGCCTCCCAAGGCCATAATGTCGAACTGGTCAGGCTTGAAACAGTGGAACCCATCGATACCAGGAATCCCACTAAGAAGAAAAACATCGACTTTACCAATCTGCCGGATATCAGCTCTGCCGACCTGCTGCTGTTGGGCGGGCCTGTCTGGGCTTTCCGGCCTTCTCCGGTGATCATGAAAGCGATCGAAGACCTGGGTGGAAAACTCGCCGGCAAGAAGGTGATTGCCTTCGTAACTCACGCATTCCCCTGGGCCTGGCTCACGGGCACAAGCTCTATGAACGCCATGCGCAGAGCGGTGGGCACCTTGGGAGCCAAGGTCTGC…
6598	c_000000001653	955	2614	r	5'-nucleotidase, C-terminal domain	PF02872	ATGAGAAAACTATTGCTGACAGCGGCGCTGGGACTGGCTTTGATAGCTGGCCTCAGTGCCGAAGACCTGCGTCTGGACATTATGTTCAGCAACGATATCCATGGCGGCATCGACCGTTCGCAGGCCACCTTCATGAATCCTGACTTCCCCCCTCAACTGGGCGGGGGAGCCTCAGCCGCCACCCTCATCAAGCATGTGCGCGCGATGGGAGGCCCCAAACGTGCTTCCCTGCTGCTGGACGCGGGTGATTTCTTCCAGGGACGCCCGGTGGGAACGGTTACCAAGGGCAAGGCTGTGATTGACTATATGAACGCCATCGGTTACGATGCCATGACAATCGGCAACCACGAATATGACATCGCCGACACGGAACTGATCAAGACCCTTGCCGACGCCGAG…
6599	c_000000001653	2622	4098	r			ATGAGATCATATAAAAGTATTATCATAACTCTTGCCTTGTTGCTTGCCGTGGCAGTTCTTTCCGCCTGGTCCATCACAGACACCTATTTTGGAAACAAGATTATTGCCATGGGCGCCCGCAATCAGGCCATGGGCGGCATCGGCGTTTTTGACGACATGCGTCCTTCGGGGTTCAGCATCAACCCTGCCAACCTGACCCTGATGGATATAACTGTGGGCCTGGAAGGCTCAGCTTTGCTGAACCGCGACGAGGACAACCGTAGCGTGCCCCTCTACAACTCTTTCGATGCCTATATCGACGACGCGGTGTATGTTTCTAACATCAATTTCTTCTACGACTACGCCCTGGCTGGATTTGCCTCCTACGATGTGATAGAAAATGGCCGGATAGGCCTGGGT…
6600	c_000000001653	4109	4262	r			ATGTATCTGTCTCTGAAATACCGGCACAAAGCGTATGAGGCCAAGGAGCTTTCGATCCGGCGATACAATGTACCCGTCCAAGCTGAAAACTACTATCAGCGAGTGGAAAACAAAGAAAACACAATCAGGCTCAGCCTTGAATACCGCTATTAG
6601	c_000000001653	4246	6646	r			TTGCTTAAAATCAAGGATCTGGCGGTTGTCTCCCTCTATATTGAGGAAGATGATGTCGCTGCCCGGCGCGAGGAGATCAGAGACCTGATGGAACGCCTGGACAGCAATGAGGGCGGTTCCGAAGGGATGTCAGACGTTTGGGAGGACTACCTGATGACTCCCCATAATGTGAACAAGATGCATTTTGACGATCTGATCAGCCTTCCCAATGTATCCGGCGTGGATGCCGTGGGGATTCTGCGCCGCGTGGCCCAGGGGGATACGATCGCCGACACCCGCGACCTGCGGAACACTGTGGGGCTGTCTTACTATGGCTACACCAATCTCCGCAGTTATGTTTACTACAAGGAACCCCCGGTGAAGAACCGCCTGATGTGGGATGCTCAGATGCAATATTAC…
6602	c_000000001653	6680	6854	r			ATGAAAAAGTTACTTGTCCTGCTGTTTGTGCTTGTGTGCGCATTACAGCTGGCTGCCAAAGTGGATCTGAACACCGCGGACCTGGACGAACTGCTTCTGCTGCCCATAACTCAAGCAGGCGCAGGACATTCTGGAATACCGCGAACATGTCGCGATCTTTGGCAGTATCTATGA
6603	c_000000001653	7169	7739	f	Pyruvate phosphate dikinase, PEP/pyruvate binding domain	PF01326	ATGCCTGATATTAAACGTGTTTACCTCTTCGGAAACGGTAGTGCCGAAGGGAAAGCTGAGATGAAAAACCTGCTGGGCGGAAAAGGCGCCAACCTCGCCGAAATGAACCTGATCGGCGTTCCGGTGCCCCCCGGCTTTACGATCACCACAGACGCCTGCAACGAATATACCAAGTTGGGCGAAGACAAGATGCGCGAACTGCTTAAAGCGGAAGTGCAAACCGCGGTCAAATATGTGGAAAACCTGATGCACATGCAGTTCGGTTCCAACGAGAACCCCCTGCTGCTCTCCGTGCGTTCCGGTTCCCGCGCCTCCATGCCAGGCATGATGGACACCATCCTGAACCTGGGCATGAACGACCAGGCGGTGCAAGGCATTATCAAAAAGACCGGAAACGAA…
6840	c_000000001704	78	270	f			TTGAAGGTAGAAAGGTGGTTCACGCAGATAGGCGCAGATAAAAAGCGCAGATATTTGAAGGTGGAATGGTGGAAAGAAAGCCACGAAACAAGCGTCATCAAGCTACATACCGTGTCTGGTTCAGAAAGTTTTTTGAGGCTTTCCCAAAATCTGGGCAGACCTATCCTTTTTTATGGTTCGTTGATAGTTTAG
6841	c_000000001704	351	726	f	Aminotransferase class-V	PF00266	ATGAAAAAAAAAATCTGTTCCAGGAGGATTAAAATATGGAACGCGTACACAACTTCAACGCTGGCCCTGCAGTGCTCCCAGAGGAAGTTCTGCGGGAAGCCCAGGCTGATTTGTTCAACTACAAGGGAATGGGTCTTTTCCGTAATGGAAATGAGCCATCGCAGCAAGGAATACCAGGCAATCATCGATGAAACCCACGCGACCGTGAAACGCATTTACGGTCTTGGTGACGATTATGACGTGCTTTTCCTGCAAGGCGGCGCAAGCATGCAGTTCCTGATGGTGCCGTTGAACTTTGCTTTTGAAGGCAAAGAGGTGAACTACATCAACACCGGACAGTGGTCAAAAAAGGCCATCGCAGAAGCCAAAAAATAG
6842	c_000000001704	814	1471	f	Aminotransferase class-V	PF00266	TTGCATATCACCACCAACAACACCATCTTTGGCACGGAATGGAAGAAAGATCCGGATATTCCAGCCGGGATTCCGTTGATCGCGGATATGTCCTCAAACTTCATGAGCAAACCGATTGAGGTCAAAAAATACGACCTGATCTATGCCGGCGCGCAGAAGAATGTCGGCCCTGCCGGCGCTGTGGTGGTCATCATTAAGAAAAGCCTGCTGGAAAAAGCGAATCCCGGGCTGCCCACCATGCTGGACTACAACACTCATGCCAAAAAAGGTTCCATGTTCAACACGCCTCCCTGCTGGACAATCTATATGATAGGCCTGGTCCTGAAATGGGTGGAATCCTTTGGTGGACTGGCGATGGTGGAGAAAAACAACATTGCCAAGGCGGATTACATTTACAAG…
6843	c_000000001704	1547	2183	f	MotA/TolQ/ExbB proton channel family	PF01618	ATGTCTCTACTGAATCTCTTCCTGCGCGGCGGATTTCTGATGTTCGTTCTGTTCGGTATTTCCATGGCTGTGGTCGCGATTGTGATAAACAAATACATGACCATCGTCAAAGCGAACAAAGCCAATGACAAGCTTAAACAAGCCCTTGCCCAGCAAAGCAAAACAGAGCAAATCCAGGCAATTCTGAAGATCCATGGAGATTCTTCTCCCCTGGGGGTGGTGTTGGACAAGCTCTACAGCTCTCCAACCAACGATCTGGAACTGATCAAATCCAGCGTCGAATCCACAGCCAACCTTGAATTGCACAAGCTGGAACGAGGCATGGGCTGGCTGTCAACCTGCGCCGCAGTTGCTCCCCTGATTGGTTTTCTGGGCACAGTGATGGGTATGGTGAGTGTC…
6844	c_000000001704	2179	2590	f	Biopolymer transport protein ExbD/TolR	PF02472	ATGAAATTGGAGATATCAAGCAAGAGGATAAGCACAACTGTCCTGATATCGATGACAGACGTAATATTCCTGCTTCTGCTTTTCCTGTTGATCGCTTCCAATTTCTCCTCTCAGACAGGGATTTCCGTACGTTTGCCCGGTTCTTCTTCCGGACAGCGTCAGGCGCATCAGGTGCTGCACATCGTGTATAATAGCGACTCCGACGTCGTTTTCAAGAACGTCCGCTACAACATCAACACTTTGGGGCTGGCTTTGAAACGGGAGTTTGCCGGCAAGGAGCAGGCTGTCAGGCTTTCCGCCAACAAAGACACTCCGCTCCAGGAGGTGGTTACCCTCATGGATGTGGTCAGAAACGCGGGCTTTGAAAAGATTTTTATTTCTACTGAAGCGGCAAAAGAT…
6845	c_000000001704	2586	3288	f			ATGACTCTGCTGGGAAAGAACAAGCCTCTGCTCATATCTCTGGGGATTCACTCAGTTCTGCTGATTGCCATGGCCATCTTTACCCTGCCCCCAAACCTTGACAGTGTCTGGTATGAAGTGAGTTTTGAGTATCCTTACATGACTGAAGAAGTTATTGAAAATACCAGTCCAGAGACCGTGACGCAAGCCCCTTTTTCCGGCGAATCCCAGGGCGGAGCCCGCGACATTAGCAGGCCTGAACAAACAGCCCAACCTCTGAATACTCCGACCCTAAACCCCGGAATACCACAAACCGGATCGGCGGAGATTTTGGAAACGCCCACACGAACCGCTGCCAAAGACCCCTCCCGTCCAGTAAGCCTGGGCAACAACCCGCTTGCCATGAACGCTTTACGAAAC…
6846	c_000000001704	3306	4146	f	Pterin binding enzyme	PF00809	ATGCAGCAACTGAAGCAGATTCGTGAACCCCAAATCATGGGGATATTGAACGTTACCGAAGACTCTTTTTCAGATGGAGGGAGCTATCTGTCTTTGGAACTCGCCCTGAACAGAGCCCGGCAAATGATTGAGGAGGGAGCCGCTATCATTGACGTTGGCGCAGAATCGACCCGTCCGGGATCGCTGCCGGTTGACCTGGATACGGAATTGGAAAGGGTGGTGCCGACTGTTGAGGCCATAAAGAAAGAATTTCCAGCCATTACCGTATCGGTTGACACACGCAAAAGCGAGGTCGCGAAAGCTTCCCTGCAAGCGGGAGCGACAATTATAAATGACATCTCCGCTCTGCGGGATGATGAGCAAATGGCAGAAACCGTCGCCTCACATCCAGGCGCACAA…
6847	c_000000001704	4133	4880	f	DisA bacterial checkpoint controller nucleotide-binding	PF02457	ATGGAATTCCTGATTCCCAGGTTCAAAGATATTGTCGATATCTTCCTGATAGCTTTTCTGATCTATCAATTACTGACCATTGTGAGGCGCAGCGGAGGCTATCAGATCCTGCTGGGCATCATGTTCATATTTCTGATCTATCTGATCGCGGCTTTGTTCGATCTGAAGATGGTAAGCTCAGCCCTGGCGTCGATCAGAAACTATTGGATAATAGCCCTGATAGTTCTTTTCCAACCTGAGCTGCGGTCTCTTTTGGCACGGTTCAATATCTCGCGGGAACTGGGACTGGCCTTTCGCAAAAAAGAGAGTAATTCCATTTATATGCCTCTGATGGATGCCATTTCATCCATGTCATTCCGAAAGACGGGGGCTCTCATCGTCATTGAAAACAAGCGCAAG…
6848	c_000000001704	4902	5280	f	Dephospho-CoA kinase	PF01121	ATGGGTTCAAACCCAATCATAATCGGCATCACAGGCAACTATGGCAGTGGGAAAAGCTCATTTTGCGATTATTTGAGGGAGAGCGGCCTGACGGTGATCTCCGCCGACGCCATTTCACAAGACCTGCTGGACAGCAAGCCAAATCTGGCCGCGATCGCCACGCGTTGGGGCAGGGATTTTGTCCGCGACAACAAAGCCGACCGCAAAAAGATAGCCGAACTTGTGTTCAACAGTCCCAAAGACCTGGCCTGGCTGAATCAGCTATTGCATCCCCAAGTGCTTGCCGGGATGCAGCGTATTGTGGATGAGTCGAACGAAACATATCTATTCTTTGAGGTGCCACTGCTGTTTGAAGCGGGTATGCAACGTTTGCTTTGA
6849	c_000000001704	5251	5392	f			TTGAAGCGGGTATGCAACGTTTGCTTTGACTATTTGATACTGGTCAGGGTGGACCCGGAGGTCAGGCTGAAACGCCTGAAAAAGCGCGACCATGCCACACAGAAAGAGATTCTTGCCAGGCTTGGGAATCAGATTGACGAT
6979	c_000000001730	0	1230	f			AAAAAGGTGTATGGCAAGCCTACAACCGCATTGTGGGCGGATTGGAAAGCGGAGATGAAGCAGCGCTCCAAACCCCTGCCGAGGCAAAACATCACCCGCCGGGGAGGACGCACCGACAACCTGCAATACCACGCGGGAAACCTTTACTACACAAACTACGGCGTTAGCAAGACCGGCCCCGGTAGCGGCTTTTCCGGCCACCGCCTGATCCGTGTTTCCGACCCCGGAGGCAAGGCCCGGCAGGAAGTCCTGGTGCAGCAGGGTTCGGATTTCCCCGCCGGTTACCAGATCCACGGGGATAAGCTCTACTACAGCAGGTCGGAGTTTAAAGGCGGGTATTCCAATAACAACATGGACGGCTTGGGCGTGATCACCCAGATCTGGGAACAGAAACTGGAA…
6980	c_000000001730	1199	1847	f			ATGTCCAAGAAGGAATGGGGCTATGAACTGAGCCTGGAAAACCACTTTTTCCGTCCGGTCAAACACAGCCTCGAGTTCAGCAATCTGGACGGCAAGACCCTCATTTCGCAGCAATATGTGCCTCTGATCACCCGCATGAATTACGGTCTTACCGGACTCAATCCGGGCTTCGGCTTCATGGCCTGGGGCAAGGAAAATGAAAACTACCGTAAACTGCTCTACCCCTTCCTGGAAGCCAGTTTTGCCTACAAAGGGGTCAGGCTCGGCACCACCACCAGCCTGCTCTATGAAAGCAAGGATGGCTGGCTGAGCTCGGATCGCGACCGCCTGGGCTGGAAAGGCCAATACAATCTGCGCGTGAAAGCGCCACTTTCCACCGAACTGCGCAGCAACCTGATC…
6981	c_000000001730	1798	1951	f			ATGGGCAAAGAAGAGCGCGGCTCCATCTCCGCCTATGGCGCGGAACTGATCGCGGAAATTTCGGCGGGATACGTCTTGTCATTCAACCTGGGCCTGCGCTTCAGCCAAAACAAGGACGGGCAAAGCCGCTGGGACTTGATTTTTGGCTTATAG
6982	c_000000001730	2047	2425	f	Glycine cleavage H-protein	PF01597	ATGGTAATGGAAGAACTATACTATACCGAGAGCCACGAATGGGTGCAGTTGAACGGCGACCTCGCCACAGTGGGCATCACAGATTTTGCTCAGAGCGAGCTGGGAGACATCGTTTTTGTGGAACTGCCGGATGTGAACAGCAGAGTCTCCGCCGGCGAGCCCTGCGGCTCCATCGAAGCCGTCAAGGCGGTGGTTGACCTGATCAGCCCCTTGAGCGGCAAGGTCGAGGAAAGAAACGGCGATCTGGATGACACCCCCGATCTGATCAACAAATCCGCCTTTGACGAAGGCTGGCTCTTCAAGGTTCGCATCAGCTCCAAAGACGAGCTTGCCAACCTCCTCACCGCTCAGGAATACAGCAAACTGATCGAAGGCTAA
6983	c_000000001730	2436	3060	f	Guanylate kinase	PF00625	GTGATAGAGAAAAACCCCAACTTCCTGATCATCCTGTCCGCTCCTTCCGGGGGCGGCAAAAGCACCATCCTCGCCGAGGTGCTCAAAGCGGCTGACAACATCGACTACTCTGTGTCCTATACCACCCGGCCTCCCCGCGGCACCGAGCAGAACGGCGTCGCCTACCACTTTGTGGATGAGCGGGAGTTTTTGCGCCGCCGCGAGGAAGGCGACTTTCTGGAGACAGCCCAGGTTTTCGGCCGCTGGTATGGCACGTCCAAAAGCTTCATCCGGGGACGTCTGGCAGCCCGCCGCCATGTGATCATGGATATCGACGTGCAGGGCGCAGCCCAAATTCATACCACAGACATTCCCCATGTGAAGATCTTCATCATCCCGCCCTCCATGGAGATTCTGCGC…
6984	c_000000001730	3056	3455	f			ATGATTAGCGAAAAGATCGAGTCATTCCTCGAAAAAGCCGACATGAACTACCTTTTCTGTCTGCTTTCCAAGCTGGAATCCCAGCGCATCAGCAAGCTTCCCTCCTATGTGCGCCAACGCTTTGAGGAGAAGATCACCGTCATGGCCATGCATCACGTGGCGGAAAACGAGGTTCCGGACTACATCGCCGAGATCGCCGAGGCTGAACTGGCCATGGCCCAGCAGGCTTCACCCTTCCAGGATGAAGAGGGGGAAGGCGAAATGAGCGAAGAAACAATCGACGACTCTGAAAGATTCATCGAATCGCTTGAACACGACAATCTGGACAAGTATGCGGATGACGACGGCGACGACGATGAAAGCCTTGACCTGGATGACGACCCATACGACGAAGAATAG
6985	c_000000001730	3603	4053	f	Uracil DNA glycosylase superfamily	PF03167	ATGAGGGCAGGATCAAGTTTTGTCTATGGAGAGGGCAATCCCGACGCCATCGCGATGCTCATCGGAGAGGGGCCGGGAGAACAGGAAAACCTGAGCGGAAGGCCCTTCGTGGGCAGGGCAGGGGATTTGCTCACCAAGATGCTGGCCGCCATCGAGATAAAGCGGGAGGACGTCTATATCTGCAACATCGTCAAATGCCGCCCACCCGGCAACCGCAACCCCGAAAACCCCGAACGGGAGGCCTGCCTGCCTTACCTGCTGGAACAGATAGAGATCATACAGCCCAAACTGATCATGATGCTCGGCCTGGTGGCTGCCCAAACCCTGTTACAGACCAGGCAGCCCATGCAGGAACTGCACACGGTGACCCACGAATTCATGGGCATCCCCAGCTACGTC…
7171	c_000000001778	1	187	r			ATGAAACGTAAGAGTATCACGCTCTTAATAATTCTAATAGCCATGGGGCTTGCCCTCTTGCTGCTCTCCGGTTGCGGAAAATCTGGCAACAGGTTCGCCAACCAGGCTCCAACAATTAAAATTACTTCGTATGAAGGTGCTGACGATAGTGACCTTCTCTCTCCTTATGCGGATTCAGTATTCGCT
7172	c_000000001778	223	1135	r	Tetrahydrofolate dehydrogenase/cyclohydrolase, NAD(P)-binding domain	PF02882	ATGGAATACGTATTAAGCGGCAAACCTGTTGCCAAACTAATCAGGCAGACTCTTAAAAGTATTATCGGGGAACATGGGTTGAGACCGCGGATGATCCTTATAATTTTAGGGAGCGACCCTGCCGCGGATTACTATGTGCAAAACATTGTTTCCTTGGGAACCAAACTCAATTGCCAGATTGAACTTGTGAGTTTGCCAGAAAACACCAGTCAAAGTGAGTTGATAGCCATGATCGAACAGGCAAATCTCGATCCCTCAGTTCATGGCATCATGATCCAGAAACCTTTACCCAAGCATATCGATGACAATGAGATTGGTTTGGCGGTTTCCCCGGATAAGGATATTGACAGCCTCAACCCGCTGAACCTTGGAAAGATCCTGCTTCAGATGGACGGCTTT…
7173	c_000000001778	1150	1444	r	YmdB-like protein	PF13277	ATGCTGGGCACCCATACCCACATCCAGACCGCCGATGAAGAGGTTCTTCCTTTGGGAACCGCATACATTTCCGACGTGGGGATGACCGGGGCGCATGACAGTGTAATCGGGGTTCGCAAAGAGATTATCCTGAACAAGTTTATAAATGCCTTGCCCAGCAGGTATGAATCGTCGGACAAGGGATTGCAGGTCAACGCGGTTTTTTTACGGATTAATGCGCAGACGGGTAGAGCGATCTCTATCCAGCGTATCAGGAGAGAGCACTTTCCAAATGTGAATGGCGGACATAGATAA
7174	c_000000001778	1499	1958	r	YmdB-like protein	PF13277	ATGATTTCACTGCTATTTTTTGGAGACGTCTTTGGCAAGGCGGGAAGACAGGTCATATTCGACACGCTTCCCAGCCTGAGAGATGAGTTTGCCCCAGATTTTGTCATTATAAACGGTGAAAATCTGGCCGATGGCAGAGGCTTGACGGAAAAGACGGCAAAGCCTCTATTTAACGCGGGGGTAGACGTAATCACCGGGGGTAATCACTTATGGGATCGCTCCGAATCCTGGGATTTTATCCGTAGTCATCCCAACATCGTCAAACCCTTAAATTATCCAGATGCGACTCCTGGCAGCAGCTCTTTTACGGTAAGCAGGAATGGAAAATCATTGACCGTGTTGTCGCTTTGCGGACAGATCTACATGCCTCCCTGCGATTCACCGTTCACAGCTTTCAAC…
7175	c_000000001778	1954	2479	r	HD domain	PF01966	TTGCGGAATTCTGCCGCGGAACTTAATCTGGATCAAGAGATTGCCCGTCGAGCCGGCTTGCTGCATGATATAGGTAAGGCTGTCGATCAGGAATTCGATGGCACACACGCCATTATTGGGGCTAATCTTGCCCGTAAAAATGGAGAAAGCAAGATTATAGTCAATGCCATAGAAGCGCATCATGAGGAAGTTGAGGCTATATCAGTATATGCCGCATTGACACAGGCTTCCGATGCCATATCCGGTGCCAGGCCTGGAGCACGCAGGGAGATGTTGGAAACATACATGCAGCGCCTGGCCAAGCTGGAAGAAATCGCCAATTCTGTGGAGGGAGTCAACAAGTCTTACGCCATCCAAGCTGGGCGCGAACTCAGGATAATCGTGGAGCCCAGCATGGTG…
7176	c_000000001778	2504	2840	r			TTGGCCGCGAGGGAAGAAACATCCGCACTTTTTGAGAAAGCGTCTGGAGTTGACCTGATTATCGATGACACACCTGAAGCTGTCGTTCTTTCCTGTTTTGATCCGGTTCGCAGGGAAATTGCCCGGCTGTCTTTGGAGAAGCTGATTTCCGATGGCAGGATCCACCCTGGCAGAATTGAAGAAATCATCTCCAAAACCAGTAAAGAAATGGAAGAGACCTTGGTTAAGATAGGTGAGAAAGCCGTGCTGGAAACCAATATCCACAACATCTCCCCAAACCTGATCAAGATACTCGGACGTTGCACTACCGCACTTCCTATGGACAGAATGTGCTGA
7177	c_000000001778	2805	3372	r	Domain of unknown function (DUF3552)	PF12072	ATGAAATTGAAACCAGCAAAAAAAAGCCGCGGTGCTGGAAGCCAAGGACGAGTGGTTCAAACAGAAGCGGTGATGGAAGACGAAATCAAGGAGCGGCAGAAAGAACTCCGCGTCCAGGAAAAGAAATACAATGACAGGTTGGGCAGTCTGGATAAACGCTTGGACTCTCTGGATAAGAAGGAAAGCAACTTGGGCGAACAGGAGAAAAAACTCAAGCTCAAGGATGAAGAGCTCAGCCGCAAGAATACTGATCTCGAGAAAGTCATTTCTGAACAGAAAACCAAACTTTCTGAAATAGCCGGATTGAGCCGGGAGGAAGCTCTGCAGATTATGCGCGAGGAGCTAATCCAACAGGCGAGACAGATAGCCGCTAATGACGCAAAACAGACTATAGAACAG…
7178	c_000000001778	3755	4025	r	Cell division protein ZapA	PF05164	ATGAAAATGGTCGAAGTCGAGATTTTCGGTCGTAAGTATCGTTTGAGAAGCGACAATACTGAAGCTACGCAAGCTATTGCAAACTCGATCAATTCTCAGTTGAACGAACTTCACGAACAATATGAAAACCTTGATTTCACCAAACTCTTGCTTCTTCTGGTGCTCAAACAACAAGAAGAATTACGCTCCCTTGAGAACCGTAATTCTGACCTCAGCAAAGAGCTGGAGAGAGTGAGTCAGATGGTCGGTAAGATAATCGGGGAGATATAA
7179	c_000000001778	4029	4347	r			ATGGACAACAAGACAATTAGCCTGCAAGAAAAGATACAGAAACTGATTGACCAATATACAAAAGATAAAAAACAGCTTGTCAAGCTGGAAGAACAGAATGCCGAACTAACAGAGCAGAACAAGCAACTCATGGCGCAGATAGAGAGTTTCAGCGCGTCCCAAAATGGATCAGCCATGAGAATCCAGGAGCTGGAAAACAAATTGAAAGACCTGGAACATAGATACTCCGACCTGCAAAGCTCTGTCAGTGGCTTTGAGACGATGGCCTCCGAGGCAATCGACAAGATCGACAGCATTTTCCCTGATTTGGATAAGTAA
7180	c_000000001778	4350	4920	r	Ferredoxin-fold anticodon binding domain	PF03147	GGTTTTTCCCATGTAAAAGGCATGGTTGAGGGATTGATGTACTCTCTTGGCGTTGGCAGTATTAGGTTTGATGATTACAAGCAACCCTGGCTGACAGGAACTGCGAACCTATCATTCAGTTCAGATAATCTATTGTGCGGTTATCTGGGCAGCATTAACCCGTTGACGGCAGAGGCTGCTGATATCGATCTGCTGACCTTGAAGCAGGAACTCTGGGTAATTGAGCTGGATCTGGACAACCTGGTTGAGCTGACCCGGAACAAACACTTCGAGTTCTCGACTCTGCCTCGTTTTCCCGGAGTTACCAGGGATATATCCTTCCTGATATCAAAGGACATCCCCTACAACATAATAGAGCAGAGCATCAGGTCTGTCGATATCAAACTGGTTCATAACGTG…
7188	c_000000001782	6	822	r	Methyltransferase small domain	PF05175	ATGAAGGCTGAACTCCTGCTGGCTGAAGCCCTGGCCGCAACTCCGCAGCCGGATGCCTCCAGTGTGCGCCTTTTGCTTGCCGAGCTGCTGGATTGTTCTCCCGTGGAGATTCCTCTCAAGGGGCAGGTGGAGCTATCCGCAGAAAGCATCACCCGCTTTTGGGACTGGCATGCCCGCCTCCAGCAGGCTGAACCACCCCAATACATACTGCAAAAAGCCTGGTTTTATGGCTTGGAGCTGACGGTCAATCCCTCTGTATTGATTCCCCGGCCGGAGACGGAAGGCTTGGTGGAACTGGCTTTGGGCTTGCTCAAGCCAGATGCCGGGATTCTTGAGATCGGAACCGGCAGCGGAGCTATCGCCATCGCCCTGGCCACTCATCTGCCGCAAGCCGCGCTC…
7189	c_000000001782	818	1745	r	Response regulator receiver domain	PF00072	ATGAAATCCACCAGCAACGTCCTGATCGTGGACGACAGTCCCAGCCTTGCCCAAAGCCTGTGCAAGATCCTGACCATGCACGAGATCAAGGCTGACGCTGTCTTCAACGCCCAGGACGCCTTGCAAAAGATCAGGCGCCACCGTTATGAGTTGATGCTCTGCGACATCGAGATGCCGGGATATTCCGGTCTGGAACTGCTGGAACGCATCCGCCAGGATGAAGAACACGATCTGGATGTGATCCTGATGACCGGACATCTGGAACCAAAATATTTCATCCGGGCGATTCAACTGGGCGCGGTGGATTTTATCAGCAAACCCATCGAGGCGCAGCAATTGGTGGGGATGATCAGCTGTCATCTGAAGCGCAGACATTCGCGGGAAAACCTCGAACAGTTT…
7190	c_000000001782	1744	2053	r	STAS domain	PF01740	ATGAAAATTGATCTTAGCTTTGATGACAATACTGCGATCCTCGTGGTTGATGGGATCCTGAACAGCGAAAACGCCCATATTTTTCAGGAATATCTGAACAAAGTCCTCAAATCCGAAGCCACCATCCTGGAGCTCGATCTTAACAACTGCAACAACATCAGCAGCACCGGCATCGGGAAACTGCTGCTATTTTACAAGGACTTTCTGGGCAAGGGCGGCGAAATCGAGGTTACCCGCTGTTCTTCCACGGTTTACGACCTGTTTACCATGCTCAAACTCAACCAGCTTTTCACCGTCAATCTGGCTTGA
7191	c_000000001782	2125	4234	r	Elongation factor Tu GTP binding domain	PF00009	ATGAGTAGCGACGCTGATTCTCCGCTCCAAAGGATCAGAAATATTGGCATCATGGCCCACATCGATGCCGGCAAGACCACCACGACGGAGCGGATTCTCTATTACGCGGGATTTCTGCACAAGATGGGTGAAGTGCATGATGGAAATGCTTTTACCGACTGGATGGACCAGGAACGCGAACGCGGCATCACCATCACTTCAGCCACGGTCGCCTGTATCTGGAACGATAAACAGATCAACATTATAGACACCCCTGGCCATGTGGATTTCACTGCCGAGGTTGAACGCTGCCTGCGGGTCCTGGATGGAGCCGTGGGAGTTTTCTGCGGCGTGGCTGGTGTGGAACCCCAGTCCGAAACCGTATGGCATCAGGCCGATCGCTACAAGGTGCCCAGGATC…
7400	c_000000001835	308	1748	f	Elongation factor Tu GTP binding domain	PF00009	ATGAAAGAATACGACTTAAAGAAGTTACGCAATCTTCTCTTCATGGGCTCCAGCGGTGCCGGAAAGACCACCCTGGCAGAGCAAATTTTCTATCTTACGCACACCACCACAAGGTTGGGTAAAATAGACGAAGGCAACACGGTCATGGATTTTGACGCCGAAGAAATCAGCAAAGGCATGTCCTTGAACCTGAGCCTCGGATTCGTGAACCACAAAGATCATAAGATCAATATCATCGACACCCCCGGCAATCCGGAATTTATCGGTGAAGTGATCGCCGCCATCCCGGCAGTGGAGAACGCGGTGGTGGTCGCCAACGCGACCGGAGGCTTTGAAGTGGGCATGGAACTGGCCGTCGAACAGCTCGATCACAAGAGAGTTGGCAAAGTAATCGTGGTC…
7401	c_000000001835	1801	2323	f	Elongation factor G, domain IV	PF03764	GTGTATTTCCGCATCAAACCCACAGAGCGCGGGGAAGGTTTCCAGTTCATCAACGCTATTGTTGGCGGCGTGATCCCTTCAAACTTCATCCCGGCAATCGAAAAAGGCCTGGTGGAGACCATGGAAAAGGGTATCATCGCGGGTTATCAGGTGGTTGACGTGAGCGTTGAGGTCTATTATGGGAGCTACCACGACGTTGACAGCTCTGAAATGGCTTTCAAGATCGCCTCATCCATGGCGCTCAAGGAAGGCTTCAAGAAGTGCAAACCGATCCTCCTCGAGCCTATCCACGACCTTGTGATCATTGTTCCAAGCGAGTATATGGGTGACGTGATGGGCGACATCAGCACCCGCAGGGGACGCATCATGGGGATGGAGCAACGCGGCAAGAAGCAATAT…
7402	c_000000001835	2500	3250	f	Transcriptional regulator	PF01709	ATGTCCGGACACAATAAGTGGAGTTCCATCAAACACAAAAAAGGCGCGGCTGACGCCAAACGAGGGCAGCTTTTTACCCGCATCGTGAAAGAGATAATTCTGGCAGCAAAGAACGGCGGAGGTGACCCCGAAATGAATCCCCGCCTCAGAACCGCAGTGCTTTCCGCGAAAGCGGCCAATATGCCCAGGGAAAACATCGAAAGAGCCATCAAGAGAGGCACCGGCGAAATTGAAGGCGCGGCATACGAAGAGATTACCTACGAAGGCTATGGGCATAATGGCGTGGGTATCGTGGTCGATGTAATGACCGACAACAAAAACCGCACGGTGGCTGATCTGAGGCACGCGTTTTCCAAATACGGCGGTAATCTGGCGGAATCGGGATCAGTGGCCTGGAAT…
7403	c_000000001835	3249	3729	f	Crossover junction endodeoxyribonuclease RuvC	PF02075	GTGCTGATCCTCGGCATTGATCCCGGCAGCCGCTACTGTGGCTATGGATTGCTTGAGATCCAAAAGAAGCGGATAATCGCTGCCGGTTGCGACGTAATTGACGTATCCCGCGAAAAGGATATCCTCAAGCGCCTGAACATGCTTTATAGCGCGGTAGATGCCATTTTGGACGAGTATAACCCGGATGTGGCGACCGTGGAAAGCATGTTCTTGCAAAGACACGTGCGCAGCATCTTTACCTTGGGCCACGCCCGGGGAGTTATCCTGCTTTCGATAGCCAGGCACAATCTGCAGATGCAGGAATACAGTCCCCGGGAGATAAAAAAAGCCGTGGTCGGTAATGGTAACGCGTCCAAACAGCAGGTGCGCTACATGGTGAGCAAACAGCTTAACCTCAAA…
8278	c_000000002043	64	820	r			ATGTATTGGTCCATTCCCAGTCGCCGAGGGGGTTTGACCAATCGGAACTGGAACCCAGCCGCCATTGTCAAACTCGAAGTCCTCCACACCTCCGCTGGAACCAGGGCTCCTCCAGACGAGGGAAACCTGAGTCTGCTCGGTGTTTTCGGTGGCCTGCACATATCGTGGAGGTACAGCCGTCTCGCTCATCACCAAGGTGCCCATGTCGTAATTGCCGGCTCCGACCTGATGCTGCCGGTCAGGTCTTTGGTAGCCTTCTGTTACCAGCTGATAGTCATAGGTGTTACCGGAGAACACTCCGGTGATTGTGAAGTGTCCTGTGGCGTTGGTGGTGCCAGAGTGGGTCGTCTGACCAACCAGGGTGATGTCAACACCAGCAAGGCCCACGGTGGGTTGATC…
8279	c_000000002043	897	1545	f			ATGTGGGGAACAGTCATCGATGGCGGTTATACCAACGCCAATGGCTGGTCTTACCTCAGAAAGACCTTCAATCTCTCCGAGTGCGCCAACCCAGTGCTCGATCTTTGGCACTATATGGACGGCTATAATAACTGGGACTACGGTTTAATCAAGGTCAACGGCAACACTGTGTGGGGCACGATCGCTTCGGCAGTATTTATGCCTTGGCAGCGCCTGACCATTGATCTCTCCGCCTATGGCAATCAGAATAACGTGGAAATCAGCTTCGAGTGGTTCGCCACCGCTACGGTTTCTTACGCCGGATGGTATCTCGACGATATCTACGTCGGACCACCCATGGGAAGGACTGTCACTCAAATTGACCCTCCCGCTCCCACGCCGCCAAGCAGATTCTCTGGT…
8280	c_000000002043	1662	4092	f	Abnormal spindle-like microcephaly-assoc'd, ASPM-SPD-2-Hydin	PF15780	ATGGCCTCAACTTACCAGGTGACTGTGGAAAACACCAGCACGACTACTCAGCTTGGAACCAACTACACGGTCAAACTGATGTCTGGAACAACAGAACTGGCCTCGACCAACGGAATTAACCTGGCTTCAGGTGAAACGCATGTTTTCGATATTGAATGGACACCCACAACCGACGGAGCCATGACCATCTACGGAAAAGTTGTGTTGAATGGAGACACCGTGCCGGACAACGATAACACGCCTGAACTCAACATCACCGTGATGGAGGCCGGAGTCATCGCCGTGACCGTGGGCGAAGGCACCTCATCGGATGGACGCCCGGTGGACTTCTATTACAAAAACAGCCTCTTCCAGTGCCTGTATTACCCTGAAGAGCTGGGAATGTTTGGGAGCATTACC…
8281	c_000000002043	4088	6104	f	Carboxypeptidase regulatory-like domain	PF13620	ATGAGCGCGAACGGAACCCTCACCGGGCAGTTCCCTATGACCACATTCTACGGCATTCCCGGCGGAGTGGGGCATCTGAACGGAACCGTCACTGGTGCGGGAGGAGCGCCTCTGGAAGGTGTGGCAGTAGTCTTTACCACCGGCGGGTACCAAACCGTCACCGACGCCCAGGGACAGTATCAGATCAACAACATCCTGTCCGACACCTACACCATCAACTTCAGCGCCTACGGCTATGTGGACGCCACCCGGACCGTAACCATTGATGAGGATGAGACCGAAACCCTCAACGTCAGCATGACCCCGATGGCCATGGTGAACGTTACAGGCCAGGTGAACGCTTCCGATACCGGAGCAGGCATTTCCGGAGCATCCATCCATCTGCAAGGATATGCCAAT…
8282	c_000000002043	6006	6195	r			ATGGCTGCGGTAATTGCCCGCGGTCATGCGATACATGTAAACACCGCTGGCGACCGGGTTGCCGCGCTCATCGGTTCCGTTCCAGATTTCGCTATAGAATCCGCGGGGCTGGATCTGGTTGACAAGGGTGCGGACGAGCTGTCCCTTGGTGTTGTAGATTTCGATCTTCACCGGTGCGGGTTCTTTTAA
8315	c_000000002051	455	1448	r	tRNA synthetases class I (W and Y)	PF00579	ATGAAAGTAGCTCTTACCGGCATCAAACCGACTGGAATTCCCCACATAGGCAACTATCTGGGAGCGATCAAGCCCGCCCTGAAGCTTAGCGAAACCTGCGAAGCACGCTATTTTATCGCGGATTACCACGCGCTGAACGCTTGCAAGGATCCAGCCGCGATACGCAACATGACTTTGGAGATCGCGGCGGCCTGGCTGGCTTCCGGGCTTGACCCCAAAAAGGTTCTTTTTTACAAGCAGTCGCTTGTGCCCCAGACCTTTGAGCTGCTCACCATACTGCTGGCCTTCACCCCCAAAGGCCTGATGAACCGCGCCCACGCCTACAAAGCCATGCTTCAGGCCAATGCCGAAGCAGGCAGGGATCCGGACGATGGGGTGAACATGGGCCTCTATACCTAT…
8316	c_000000002051	1461	2097	r	TRAM domain	PF01938	ATGTATCTGCATCCTGACCACTTTGAAACCGGCTGGCTGGAGCTGTGGAAAAGGCTTCCCAAGTTGCTGCCCTCTTTTGAGATTCCCATCCAGCACAGCGAAGACGAAATCCTGAGCTCCATGCGCAGAAAACTGGGCGGAATGGAACTCATACAACTGTTTCATAAGATTCGGGAAAGCTTGCCCCAGGCTGTTCTGCGCACCACTCTGATCTGTGGCTACCCGGGCGAGAAAAGGCGGCACGCGCAGGCCCTGCAGCGCTTCATCAGGGAAGTCCGCTTCCTGCATCTGGGCGCCTTCGTTTACTCCCCGGAAGAGGGTACCCTTGCCATCAGGATGGAAGGACAGGTGCCCGCCCGCACCGCGAAAAACCGCCGCAACAGGCTTCTTGCCCTGCAA…
8317	c_000000002051	2080	2758	r	Uncharacterized protein family UPF0004	PF00919	ATGAAAACTTACTACCTTGAGAGCCTTGGCTGCGCCAAGAATCTGGTGGACAGCGAAAGCTTCGCCGCCATCCTTGAGCGGGCAGGCTATCAAGCCCTGGAAACGCCGGAAGGGGCAGACCTGGTGTTGGTGAACACCTGCTCCTTCCTGCGCGATTCCCTGCACGAGCTCGACCTGGTGCTCGCCGAACTGGCAGAGTTGAAAAACAGCGGAAGCTGTGGCAACCTGCTGGTCACTGGCTGCGTCACCAAACGCGGCCTGGAAGAATTCCAGCGCTGCTATCCTGAAGTGGACGCCTGGATCCCTTTGAAGGATTTTGCCGCCCTGGAACGCTATCTGAAGCTGGATGGCAGCAGCAAAACAGAGCGCAAGGCGATAACGCACTCCTATTACCGCTAT…
8318	c_000000002051	2754	4005	r	Protein of unknown function (DUF1015)	PF06245	ATGGCTACTTTTAAACCCTTTCGCGCCCTGCGCCCGATCCCGGAAAAAGCGGCTGCCATAGCCTCCATGCCTTACGACGTGATGGATTCCGATGAAGCGCGGGCTGAAGTGAAGAAAAACCCCCTCAGCTACCTGCATGTGGAAAAACCGGAGATCGACCTGCCCCTGGGCACCGATCTCTACGCGCCTGAAGTGTATGCCAAAGCCAGGGAAAACCTGCTCAGATATGTCAACGAAGGCCTGATGAAACAGGACTCGCGCCCGATGTTCTACATCTACCGCCAAACCATGGATGGACGCGACCAGATCGGCTTGGTGGGGCTCGCTTCCGTGGATGAATACATGAACGGAATCATCAAGAAACACGAGCTCACCCGGGCAGACAAGGAAGCCGACCGG…
8319	c_000000002051	4028	5300	r	Aminopeptidase I zinc metalloprotease (M18)	PF02127	ATGAATAACTACATTAGGGATCTGCTGTCCTTTTTGGACGCATCGCCCACCTCCGTCCAAGCCTCCCAGCAAATAGTAAAGCGGCTTGAGGAACGGGGGATTCGTCGCCCTGGACGAGGGCAAAAAAAGTGGAAGCTGAAACCAGGCGCGAAATACTATCTGCGACGCGATACCAGCGTGGTAGCCCTGGTAACAGGCAGCCAGCCCCTGGCTAAAACAGGCTTTCAGCTTGCGGCAGCGCATATCGACAGCCCTGGCCTGAAGCTGAAACCAAGCAGCCTGAAGACAGATGGAAACGTCGCCCGGGTGGCGGTGGAAGTGTATGGCGGCCCCATCATCAGCAGTTGGATAGACAGGGAACTGGGCATCGCCGGAAGGGCTGCCGTCAACTACGGAAAA…
8320	c_000000002051	5451	5712	f			ATGCGGCTGAAGCTTGCCAATACCTTGTTCACGTTTTTGCCGGTTCTCTTCCATGATGCGTGGCAGGTCAGCCTCTTTGAGGTGATCCGCGTCCAGGGCATCCAGATCTGGATAGATGAGGGCATGCAATTGCCTGTCCCGCTCCAGAACCAGCGTCTCCCCAACATAGGGAAGGTTGTTCAGCTTTTGTTCCACCAGTTCGGGATAGATGTTTTCTCCGCTGGGGCCCAGATCATGTTTTTGGATCTGCCCTTCAGGTAG
8321	c_000000002051	5630	6443	r	AMP-binding enzyme	PF00501	ATGCTGCCCCATCGCTCCTTGCTTGCTAATGTAAATTTTGCCGTGGGTAAACTGTGTTTCAAGATCGGCGCCAACGTCTTTGCCTTCCTGCCCATCGCCCATGCCTATGCCAGCGCGTTTGACTTGCTCTACCCCATTACGCGCGGCAATCACATCAACTTCCTGGATAAAATTCCAGCCCCCAAGCTGCTGCTCAACGCCCTGCAGGATCTCAAACCCAATGTGGTACTGACCGTTCCCCTGCTGATCGAAAAGATCTACAAGCGCCAGCTGCAACCGCAGGTGGAAAGCAGGAAGATCAAGGCCCTGCTCAAGATTCCGCTTGTCAAAAACGTGATCCTGAAGAAAATCCACGACAAGCTGATGGCCGCTTTCGGCGGAAACATTGTGGAACTGATC…
8322	c_000000002051	6442	6655	r	AMP-binding enzyme	PF00501	TTGCGCAAGATAAAGTATATTTTTGCCTTGGAAGATTTTCGCCTGCTCGTCAACCGGGTGGATAACAAGAAGGAACTGTTGCCAGCCCTGGAAGACACGCCTGAATTGCTCAAGCTGGGCCCGTCTGGATTCTCTCCCCCTGATGTGTGTGACAACGAGGATATAGCGTCGATCGTTTACACCTCCGGCACCGCCGGCTTTCCAAAGGCGTGA
8442	c_000000002083	2	809	r	Putative Fe-S cluster	PF04060	ATGATCGTTACAACCATACTCGCAGCCAGCATCGGCTCCCAGGTCCTCATCCCGGTGATCATATTGGGGATCATGGGGCTTGTCTTTGGCATCATCCTCGCCATCGCCGCGAAGTTCTTCAGTGTTCAGACCGACCCCCGTGTGGAAGAGATCACCGCCATCCTGCCCGGAGCCAACTGCGGCGGCTGCGGTAAGGCAGGCTGCTCCGGTTATGCTGACGCGGTCGTGCATGACGGCGCGCCGGTGAACCTGTGCGCTCCCGGAGGCGCGGAAGTGGCTGCCCATATCGCCCGCATCATGGGCACCGAGGCGGGTTCCATGCAAAAGAAAGCCGCGGTGTTCCACTGCTCTTCCGGCGGTTACAAAAACACAAACTGGAAATATACCTATGACGGCATC…
8443	c_000000002083	821	1271	r	Rnf-Nqr subunit, membrane protein	PF02508	ATGACCGTCGCTTCGGCCTTTACTTTCCTGATCGACAAGTATCTTTTGGTGGCCAACGGCTTGGAATATCTGCGCACCCTGGCTTTCATCCTCACTATCGCCGCCTTGGTGCAATTTGTGGAAATGGTGATCCAGAAGAATGCTCCGGCGCTCTACAAATCGCTGGGCGTGTATCTGCCCCTGATCACAACCAACTGCGCGGTGCTGGGCGTGGCCATCCTGAACGTCACCCCGCTGCCTGACGGCTCCACATACAACTTCCTCTGGGCAACCCTTAACGGCTTCCTGTCCGGAGTCGGCTTCACCTTTGTGTTGCTGGCAATGGCGGGAATCCGGGAACGGCTCGAACTGGTCGATATGCCCAAAAGCATGCGGGGATTTGCCAGCGGGCTGATCCTT…
8444	c_000000002083	1279	1423	r	Rnf-Nqr subunit, membrane protein	PF02508	ATGGGATTCTTCGGACAACTTTTCGTGATGGCCGTGAGCGCCATCTTTATCCAGAACTTCGTGCTCGCCAAATTCCTCGGCCTTTGCCCCTACCTGGGTGTCTCCAAAAAGCTGGATTCCGCCTTTGGAATGGGCATGGCGTGA
8445	c_000000002083	1422	1635	r	Rnf-Nqr subunit, membrane protein	PF02508	ATGGCAGACGGCATCGGAATGGGCCTGGGATTCACGCTGTCCCTCAGCGTGGTGGCAACCATTCGCGAGCTTCTGGGCAACGGCACCTGGCTTGACATGAGGATTCTGCCTCAATCCTACAATCCCATGCTGATAGCGATCCTCGCCCCGGGGGCCTTCTTCACCCTCGGCTTCCTGATGGCTGCGATCAACATGCTGAAGGAGAAAAGATAA
8446	c_000000002083	1868	2012	r	Rnf-Nqr subunit, membrane protein	PF02508	ATGAGCTTTTTCAAAGAACTTACCAAGGGAATCATCAAAGAAAATCCCACTTTCGTGATCGTGCTTGGCATGTGCCCCACTTTGGCAACGACCACCTCGGTAAAAACGCCATCGGCATGGGTATCGCGGCAACCTTCGTTCTGA
8447	c_000000002083	2008	2602	r	FMN-binding domain	PF04205	ATGAAGTTTTATCTCAAACTTGGATTCATCCTGCTGGCCTTTTGCGTGGTCGCCACAGCCATTCTGGCCTATGTGAACTCCGTCACCAAACCGCGCATTGACGAGCTGAAGAGGGTTGCTGCGCAGGAAGCGATGGCTAAGCTGATCCCCAACGCAGAGTTCAGCGATGTTGTGATTCATCTGCCCGAGGGTGCGTCCACCCCAGACTCGCTGGTCTATTACATCGCGACCGCAAAAGCAGATTCGACCAAAATCCTCGGCTATATCTTATCAGCGGAAAAACATGGTTATAGCAGCAACGTAAAGACCATGGCTGCTATCGATACGGAGTTCAAACTGATCAACATCAAGGTGATCGAGCAAGCCGAAACTCCCGGCCTTGGAGCGAATTGCAGTTCC…
8448	c_000000002083	2598	3723	r	NQR2, RnfD, RnfE family	PF03116	ATGAAAGATAAATTCATCGTCTCTCCAGCCCCACACCTGCATGACCGCACCAGCATCCCCAACGTGATGTGGAACGTGGTCATCGCCTTGCTGCCCGCGCTGGTCTTTGCCGTCTATTACTGGGGTTGGCGTTCGCTCTGGCTCACCCTGCTGGGCGCGCTGTCGGCCGTCCTGACCGAAGCCCTGATCCAAAAACTCCGCAAGGTGCCCATCACCATCTCTGACGGCTCCGCCTTCCTCACCGGCATGCTGCTTTCCTATAATATATCAGCTAATTCACCCTGGTGGCTTCCGGTGTTAGGCGCGGCGTTCGCCATTGCGGTCGGCAAGCAGGTCTTTGGAGGATTGGGTAACAATCCGGTCAACCCCGCCCTGCTGGGACGGGCTTTTCTGCTTGCG…
8449	c_000000002083	3733	4273	r	SLBB domain	PF10531	GTGGTGGAAAACGTAGGCACCGCGGCTGCCATCTATGAGGCCGTCCGTTTCAGGAAGCCTCTGGTAGAGCGGATAACCACGGTCACCGGTTCCATCGTGCAGAATCCCAAAAACCTCAAAGTGCGCATCGGCACACCTTTCTATGAACTGGTAAACTTTTGCGGCGGCATCACGGGCGATATCGGCAAGATCATTTCCGGCGGCCCCATGATGGGCGTCGCCCTTCCCTCGCTGGACGCGCCGGTAGCCAAGGGATGTTCCGGCCTTGTGTTGCTGAACACCAGGGAAGCCCGTAGCATCAAAGAGCGCAATTGCCTGCGCTGCGCCCGCTGCGTGGATGTCTGCCCGATGAACCTGATGCCCAGCTTGATCGCGCAGGCGGTCAAGGGCAACAATCTG…
8450	c_000000002083	4257	5058	r	Respiratory-chain NADH dehydrogenase 51 Kd subunit	PF01512	ATGCGGCTAAAAACGTTTCCCGGGGGTGTGCATCCCCATGATTACAAGCACTACTCCGCCTCGGTTCCAATAGAGGAACTTCCCCTTCCCCAGAAGGTTATCATCTCTCTGTCCCAACACATAGGCTCCCCATCAACGCCTTTGGTAAAGGTGGGTGATGAAGTGAAGGCCGGGCAGAAGATCGCCGATGCCTCGGGATTTGTATCCATCCCCCAGCATGCCTCGATCAGCGGCAAAGTTAGCAAAATCGACATTTTCCCCCATCCCTCCGGAACACCGCAACTGGGCATCGAGATCAGCTCCGACGGTTCCGACAACTGGGTGGAGCTGGCTGACGATCCAAACTATCTGGAGCTTTCCCCGCAGGAGATCAGAAGCAGGATTGCCGAGGCAGGAATC…
8568	c_000000002117	2	122	f	Probable molybdopterin binding domain	PF00994	GAACGCGAGGATACGAGCGGACCGGCAGTGTCGCGCATCCTCTCTGAGAACGGCTGGAACGTGATTTATGAAAGCATTGTGCCCGACGATGCGGACCGTATTTGCAAAAGAGTTGACTGA
8569	c_000000002117	443	1193	r			GTGGCCGTGCAGGCAGCGGGAATCGTGGCCATTACCCTCGGTGACGGCGGCGAGATCGGCCGCATGCCCATGGACATGTACTGGAAGAACTCCCTGTTCGAGGCTATTTACCTGGGCTCCGAGCTCAACATTGGTGGCCTGATAACCGGCATCCAGTTCTACAACGACTTCGTCAGCAACCTGCCCAACATGCCCACTAATGTTTGGTTAGGCGAGACCACCCAGACCGATCTGTCGGCTGGCTGGATCCCTTCAACCCAGCTCACCGCGGTGTTCGCCGGTAACGTCGATTATCCCAGCGGTCCGAACAACATCAACATTGCCTTCACCACCCCTTACACCTACGCGGGCGGTAACCTGGTATTGCTGGTGGAACGCCCGATGGATACCGAATGGCAC…
8570	c_000000002117	1149	2634	r	CUB domain	PF00431	ATGGAACTTGGTACAGGAATTTCCGCCAGCAGTTTCTGCTACTGGCCACGGAAATCGAGGACGCGGGGCGGTGGAGCGGGCAACATCAATTCAGTGGCCTTCAATGTGGCCAATCTGAACACCTGTTCCCCGATGCCGAACTACACAATTCGTCTGAAACACACCACCCAGACCACCCTGACCACCACGTTCGAGGATGGGGACTACCAGACCGTGTACACGCAGGCAGAGTTCATGCCCGTGGTTGGCTGGAACACCCACACCTTCTCGACTCCCTTCGTCTGGGACGGCACTTCGAACATTCTTGTCGATATCTACACCACTCTCGTTACTGGGAACTACACCCGTAATGCTTCTGTTTATTACTCCTCCACCACTTTCAATAGTGCCCTGCGCTAC…
8571	c_000000002117	3141	3876	r	C4-type zinc ribbon domain	PF02591	ATGGAAGAACAACTGCGCACCCTGGTTCAAATGCAAAAACTGGATGACCGCATCGGCGCTCTGAGGGTCCTGCAAAAGGAACTGCCCCAGCAGCTTAACGAAATCATCGGGCATGTGGACCAGGCAACCGCGAATTTGCTTGCCTGCGAAACAGAACGCGCCGAACTGGCCAAAAAACAGCGCTCGCTGGAAAGCGACATCAAACAGCATCAGGAACAGATCAAAAAATACAGCAACCAACTCTCCGAAATCAAGACCAACAAAGAATATAAGGCCCTCAACAGCGAGATCGCCTTTCTCAAGGAAAAGATTTCAGAGCAGGAAAGCCACCAACTGGAACTGATGGATGCCGAAAACCAGGCCGCGGCGCGGGTGAACGAAGCCAAACAGGAACTGGAC…
8718	c_000000002158	325	1966	f	Repeat domain in Vibrio, Colwellia, Bradyrhizobium and Shewanella	PF13517	ATGAAGCAATTTTCGCGGGTAGCTTGTTTTATTTTTGTTATGCTTTGCGTATTGACTCCGTGCAGGTTTTATGCCCAGCAAGCCTTGCAAGAGATCGTCCGGTTCAATATCCCCGAAGGGGAGCATTTCCCTTATTCCAACGAAATGGGTGGCGATCTTAACGGCGATGGACGGCCTGACCTGGTTTTCAGTTGTATAGATGAATACCATTACTCATATTTTCCAGTTTACATCTACTACAGCATTCCTGACAGCAACGCGGTTCCGGATCAGATCCTGACAATTCCATGGCCCAATGTCGGTGGCTTTGGATACAGCCTTGCCTACGCGGGAGACCTGAACGGAGATGGCATCAGCGATCTGGCAGTGGGGGTGCGTTACTATGGAATTGGGATAAGT…
8719	c_000000002158	1967	2066	f			ATGGAGGAAGACATGAAGTCAATCGCAATGACACTCGGTCTGTTAATAGGGTTGATTGGGCTATATGGCACCAACTACTCTATTCAATTTGATATCTAA
8720	c_000000002158	2603	4181	f	Anaerobic ribonucleoside-triphosphate reductase	PF13597	ATGTTTTCGATGATTCGGAAGCGCAACGGCAACATAGTATCTTTTGATAAGCAAAAAATAGTGCGCGCCATCCAGAAAGCCGGGGAAGCGACTGGTGAGTTTGATGCGGACATGGCGGAGGTTCTGACTCTGCGGGTGGTCAATCTGGCAATGCAGATCATCACCACCGAGATCCCGGAGGTCGAACGCATCCAGGATATCGTGGAAGAGGTCTTGCTGGCCTCTCCTTACAAGAAAACCGCCAAGGCTTTCATCATTTACAGGGATCAGCATGCCAGGATTCGGGAGATGTTCAACACTGGCGGGGTTCAGCTTATCGATCAGTATCTGGAAAAGCTCGACTGGAAAGTGAACGAGAATTCCAACATGGCCTATTCCTTGCAAGGCTTGAACAATTAC…
8721	c_000000002158	4134	4740	f	Anaerobic ribonucleoside-triphosphate reductase	PF13597	ATGGACTATCTGCGCGGCAGGCTGATAGAGATTCAGGAAGAAACTGAATGCAACTACAACCTGGAAGCAACTCCGGCGGAAGGAACAAGCTACCGCCTGGCTATCCTGGATAAAAAGCTGTATCCGGAAATAATCAGCGCCAACCCGCATGGTGACACGCCATTCTATACGAACAGCACACAACTGCCAGTGAACTATTCTGACGATATCTTTGAGGTGCTGGACCTTCAGGATGAGCTTCAGACCAAATATACCGGCGGCACTGTGCTGCATATCTTTGGCGGAGAAAGGGTGGAGCATGGCCAGAGCATCAAACGCCTGGTGCGTTCGATCTGCGAAAACTATAAACTTCCTTACTTCACTTTCTCGCCCACTTTCAGCGTCTGTTCCCAGCATGGC…
8722	c_000000002158	5205	5442	r			ATGGATCAGGCTCTGGCTTTGGGGATGATCCATCAGAGACCTGTAAGCCGCCTCGCTGAGGCCAGTTTTCTCCTTGCCCGGTTGCAGGTTGTCCAGGGTTACTTTGTAGCGGCATTCCTGCAGGCAGAATTTATCTCCCGGCTTCAGCAGGGCTCGGATGTCGGCAATATCGTCCCAAGTGAACAGGAGATCGAAAAACGTGGTGCGGAACTCGTAACCCTTCCCGCTTTCCCTTAA
8723	c_000000002158	5503	6721	f	Radical SAM superfamily	PF04055	GTGAATATCGAACCCTGGCTGCCGCTGGTCAGAAAGCCTTCACGCTATATCGACCATGAGATCAACGCCGCGCGCAAGCCATGGCAGAAGGTCAATTTCTGCTTTGCCTTTCCGGATGTCTATGAGGTCGGCATCTCCCATCTGGGCTTGAAGATACTGTATAGCATCATCAACGCTTTACCCGATTGCATGGCTGACCGCTGTTACCTGCCCTGGACAGATATGATCGCCATTATGCGGGAGCGCGGGATTCCCCTCTTCGGATTGGAAAGCCGGATCGCCCTGCAAGATTTCGACGCCATCGGAATCACCTTGCAGAGCGAGCTTACCTTCACCAATGTGTTGGAAACGATCTCCCTGTCCGGCGTTCCGATCCTTTGGTCTGAGCGTGGGGAGGAT…
8724	c_000000002158	6662	7775	f	Uncharacterized protein conserved in bacteria (DUF2344)	PF10105	ATGGTCGGATTGCCCCACGAAACAGAGGAGGATATCGAGGGCATCATCGATCTAATTAACAAGATCAACAATCTGGGCAAACGCCGCCTGCAGATCAACGTTACGCTCTCGCCCTTTGTGCCCAAGCCCTTCACCCCCTTCCAATGGGCCGCCATGCTTCCCGCCGATATGCTGTTGCAGCGATGCGTCAAGGTGAAACAGGCTTTTTATCGCGCCAGGAGCATCAAGATCAAGTATCATGATATTGAGAATTCCATATTGGAGGCCGTATTTTCGAGGGGGGATCAACGCTGCGCGGAGCTCTTGAAGCTTGCCTGGCAGAAAGGGGCGCTGTTCGATGGCTGGCATGAGTGCTTCAATTTCTCTTTCTGGCGGGAAGCCGCCGCTGAATGTGGCTTG…
8725	c_000000002158	7734	7944	f			ATGTTCACCAAAAGCACGGAAAAGCGTTCCAAGACTTATGATCTGAAGCAGATTGTCGGCAAATGGCATTGGAATGAGGATCAGTTGCAGATCGAGAAAAGCCTGGCCAGCCCGTCTTTGTATGATGTCTTGACCGTCCTGCTGGGGATGGGCGCGGAGGATCTCTATGCTCTCCGGGTGAGCAGGGAAGGCTGGATCTTCCCTTCCTGA
8726	c_000000002158	8246	8534	f			ATGTATAAGGTTTGGCTGCAGTTGCTTTCGCCGGCGGGTGAATACGTCTGGCCTGCTCCGGCGGGGATATTGGTGAGCGGTCACAATCAGATGTCCTGGCTCACCGAGTATGCCTTGACGGTTGATAACGACCAGAACGCGGTCATTACCTTTCAGGACATCCGCAACTCCGAAGTCAACAATGTGCTGGCCTACAAGATAAACCCGCGGGAGATTTTCTTTGGGGCGCGAATGGGATCGTCCTCACTCAGGACACAGATCCAAATTATTCCAATATGTCGCCTGTGA
8727	c_000000002158	8521	9049	f			ATGTCGCCTGTGATTTTCAACTCTGCGGACAACAGCTGTTACGTTGCATGGCAGCGGCTCGGGGCCACCACGGCCATAGGAATCAACAGACTCAGCGCCACAGGGGAGAAGCTCTGGGGAGAGAACGTACTGAGCATTTCCGAAACCGAAGGAAGCTTAACCTGGCCCCAGATCATCCAGGCTGACGGCAACAATATCCTGCTCAAATACTTTCATGACACCGGTCCTTTCTGGGCTCCCACCCGCACCGTCTATGTGGCGAAATATACGCCGGAAGGAAGCAGATTGTGGACTGCCGTGGTGACAAACCAGGGCGGCATTCCCGCCTGGGAACAACTGATCCCCTTTGAACCCGACGGACAGGGAGGATGCGTTCTGGCTTGGTATGAAGACCGTGAT…
8728	c_000000002158	9005	10019	f			GTGGATTCAGTCAATCAGCAGTTTTATCCCAAACTTTCCGTTGACCCCGCCAGCGAGCGTATCTACGCGTATTTCAGGATAACCGACTCGCTCCAGGGCCAGTTCGGTTTGGCAAGGCAACTGGTGGACTACTCCGGAAACCGCCTCTGGGGTGATATTGCCCCCAACATCATCGATCTCAGCCCCACTGAAGCAAATGCTATCGCCGCTTATCAGATCAGCACCGGTTCCGTTGTGCTCTATGGAAGCGGGGACAATCTCTACGCGTCCCTTTGGCGGGCAAACGGCAATATGGGCTGGAATGAGGCAACCTGCCTGGCCAGCACGGCGGTGTCCAAGGGTCACTTTGACGTCGCGGTGCATCCAGATGAGTGGTCTGTTCTTGCCTGGGAGCAAGGG…
8866	c_000000002185	2	620	f			GCGGTGGCCTTCGTGTTTTCCTGCCACTGGCTGGGGCTGGTGGAGATCGGGCACAACACCAAGTTCCGCGCCATCATGTATATACCCTGGGTGATCTGGGCGCTGTTCAGGCTGCGCAAGGAACCGGGTCTGCTGGGGCTGGGTTTTCTGGCCACGACCCTGATCATGCAGTTGAGGGAAAACCATCCCCAGATCAGCTACTACCTCTATCTTTTTGTGGGAATGTACTGGCTGTGGCAGTTGATCGAGAGCGTCCGCAAGAAAGACGGTAAACGCTTTGTAGCCTTTACCTTGCTGATGGCGCTGGCTTTTGGGCTGACGGCATTGGCTGTGATGAATCCCTATCTGAGCACACTGGAATACAGCCACCATACCATGCGCGGAGGTCCCCAAGGCCTG…
8867	c_000000002185	631	2083	f	Bacterial membrane protein YfhO	PF09586	ATGTCCTTCGGCAGCGCAACCCCCTGGCTGAGCGGGCTGTTCATGAAGTATCTGCCCTATTTCAACAAGTTCCGTGTGCCCTCGATGATCCTCACCATGGTGCAGGTGATAGCCGCGCTGCTGGCGGCTTTGGGACTGGACACGCTGCTGAGCGAAATGAACAACCGGGAGCAGAAGTGGAGCAAGGGATTGTTCCGCGCTTTCTGGATCTGCGGGGGAATCTTTGTGGTCTGGTTGCTGCTGGGCAAGACCGTTTTTGGCGGGCTGAGCTTCACCACAGCAGGAGAGATAGCGCAACTCGAGCAATACAACATGATGGCGCGCCTGCCGCAACTTAAGGCAGACCGGCTGGCGCTGCTCTACAACAGCGGCGTGCTGAGTCTGCTGCTCCTCACCGTA…
8868	c_000000002185	2089	2839	f	Initiation factor 2 subunit family	PF01008	ATGAGAATCAACAACGCCGATTACCGCAGCGTCTGGTGGGAGCATGGCCGCCTGAAAATGATTGACCAAAACAGGCTCCCGCAGGATTTCGTGATCGCGGAGTTCACCAGCCATGAAGCCGTGGCGGACGCCATCCGCTACATGACCGTGCGGGGAGCCCCTGCCATCGGGGCCGCGGGCGCTTTCGGCCTGGCGCTGGCTGCGCAGAGCGCACCGGAAACCAAGTTCCGCGCCTCCCTCAAACAAGCCCGGCAACTGCTGATCACCACCCGCCCCACGGCTGTGGACCTTGTCAACGGCGTGAATTACGTGTATGAGGAGGCCATCCGCTTTATTCCGGACATCCCCCACGCCAGACAGGTAGCGATCCTCGCCGCCAACGAATTTGCCAACCGCAGC…
8869	c_000000002185	2889	3123	f	Initiation factor 2 subunit family	PF01008	GTGTCCGTGCCGCTTTCCACCTTCGATCTTACCTGCAAGGAAGGCGGGGACATCCCCATCGAGTTCCGTCCGGATGACGAAGTTAGAATCTTTGGGGGAGTGCAGCTTAGCAACCCCGGTTCCCCGGTGCTGAATCCCTCCTTCGATATCACGCCCGCCAGCTACATCACCTCCATCATCACCCCCGCGGGCATCTTCGCCCCCGAGGAAGCCGCCAAAAAGGCGCAGGGCTGA
8870	c_000000002185	3124	4015	f	Amidohydrolase family	PF01979	ATGAACGGCAGTCCCCGGCAGATCGACCTGCTCATCCAGGGCGGTATCATCCTCTGCATGGACGCGGAGCGGCGCGTTCTGGAAGGCCACTGCATCGCCATCGATAAAGGCCGCATCCTGGAGATTTGCCCCGACAGCGCGGACAAATACCAGCCAAAGCAAAGCATCAACGCCAGCGACTGCATCGTGATGCCGGGCCTGATCAACCTGCACACCCATCTGGCGATGACCTACTTTCGCGGCCTGGCGGATGACCTGCCCCTGGAAAGGTGGCTCAATGACTATATCTGGCCGCTGGAAGCCCGCCTGCTGAACCGTGACTTTATCTACCATGCCGCTCTGCACGGGGCGGCGGAGATGATCAAGAACGGCATCACCCAGATCAACGACATGTATTTC…
9091	c_000000002235	2	455	r	Cell cycle protein	PF01098	ATGATCAACCGCAAAAAGTTTGACTTCGTGCTGGCGGCATACCTTCTGGCATTGATCATTTTTGGCTGCGTGGCCATCTACACCGCCTCCTGCACCACCATCGGGGAATACACCACCGTGGCCAGCAATTGGTGGAAGCAGATCATCTTTGCCGTCATAGCCATCGGCTGCACGATCGTGTTGATCCGCCTGCCAATGCCAATCTTCGACATCTTGATCCTGCCCCTCTCAATCCTGAATATACTGGCTTTGATAGCTGTGCTGTTCACCCAGGCCATCCACGGCTCACACCGCTGGTTCAGCCTGATGGGCATCCATTACCAGCCTTCGGAAAGCGCCAAGCTGCTCACCATCATCATGACCGCCAGAGTCATTTCCAAGGAACATCTCTCCGAACTC…
9092	c_000000002235	567	1509	r	Penicillin binding protein transpeptidase domain	PF00905	GTGTTCCTGCAAAGGATAAGCCCCGAGCTGTGGGCGGAGTTGAACTCCTCTTCCCGGCCGCTGCTGGACAGGATCATCCATGCCACCTATCCGCCAGGCTCGGTTTACAAACCCGTGACCGGAGCCGAAGGGCTGGAGGCGGGCCTGATCGACCGCCACACCCGCCTGGCTTCCTGCAGGGGAGGCCTCAAGATCGGAAACCGCTTCTTCCGTTGCTGGTCCAGCAGCGGGCATGGTTCGCTGGACATCGTCAACGCGTTCAAAGTATCCTGTGACGTATTCTTCTACGATCTGATAAACAAAGCCAACCTGGACAACTTTTACAGGATGGCCGTGGCCTGCGGCGTGGTGAACAAGACCGGGATCGACCTGCCCAACGAGAGGAATGGCTTCTACCCG…
9093	c_000000002235	1490	1646	r			GTGCTGAGCATCGACAACGACCTGCAAAACTACGCTGATGACATCTTCCCGGAGGGACTAAAGGGCTGCATCGTGGTCTCGGATGTGAAAACCGGCGGCATACTCGCCTATGTGAGCAAGCCGGACTACGATCCAATGTGTTCCTGCAAAGGATAA
9094	c_000000002235	1608	2340	r	Penicillin-binding Protein dimerisation domain	PF03717	GTGACTAAAAGCGTTTCCACCCTTGTTTTCCGCATCACTTTAGGTGTGCTGCTGCTGGTTTTGGTGGTGGCACTCTTCCGCCTGCAGGTGGTGAAGGGGGCTTATTACCAACGCATCGCGGAAAGCAACTTTGTGCGCATCCGCAGGATCATTGCCACGCGGGGCGAGATCTACGACAGCAAATACCGCCCCATCGCCGCCAACATTCCCTCCCAAAACCTCTACCTCACCAGCGGAAAGATCGCCAGCACCGAGAGACTGGCCGCTTTTCTGCTGCGGCATTTCGGCATTAGCGCGGAAGAGCTGAAGGAACTCGTGTTCCAGCAGCGCTTCAAATCCTATGAGGAAATCCTTCTGGCCGTGAATGTGCCCTATGAGACGGTGCTTAGCCTGTCTGAA…
9095	c_000000002235	2332	2827	r	rod shape-determining protein MreD	PF04093	ATGTTCTGGAAGCACCTCTGGACCTTTTTATTGGGCATTATCTTCATCTATGTCCAGGTGCTGATCATGCCCGCTTTTGAGCTGTTCGGAGTGATTCCCCAGATTCATATTCCCCTACTGGTCTATTTTGTTTGGACCCGGGAGCGTAACTCCAACTTGATCATCTCTTTCCTGATCGGCTTGATCTACGACACCACCCAGCCCGCCTCCTTTGGTTTGCACGCCTTGCTCTTTGTGCTGTTGGTGGTAAGTTTGGAAGAGTTTCGCAAACCCTTTGAAGAGGACAGCCTGGTGGCCAAGATACTCACCATCCTGCTGGCCAATCTGGTCTTCCATCTCATACAGTTGCTTATCCTGGGTGTGTCCTACGAGTTCAGTACCAAGTTGCTGGTCACCAAC…
9096	c_000000002235	2942	3518	r			ATGAACAAGAGCAAAAACATCTCGCCCATCATAGTGATCAACGACTCACGCGTGGAACGCATCCCGGTGAAAACCAAAATACTTACCGCCGAAGACAACATGGCCGACATCATCAGGGAATACGCGCTGCCGCTGATGAGGCCGGGAGACATCCTCACAATCAGCGAAAGCCCTCTGGCTATCACCCAGGGCAGGGCTATACCGGCTGACCAGATCAAGGTCGGCAAGCTGGCCAGATTTCTTTCCAAGCGCGTGATGAAGGTGCCCTATGGCATCGGCTTGGGCGCTCCCACGAGCATGCAGTGCGCGATCGATGAGTGCGGCTGGCTGCGCGTCCTCTTTGCCGCGGTTGTGGGTGGATTCACCAAGCTGCTGGGGCGTTCGGGAGATTTTTACCGC…
9097	c_000000002235	3514	3976	r	rod shape-determining protein MreC	PF04085	GAGGTGATAGGCTATTCGGGGCAGTTTCACCAACGCAACCTGATGGTCAACAAAGGCCTGGGCAGCGGCATCAGGATGGAAAGCCCGGTGGTATCTGGCGCGGGTATTGTGGGCAAGGTGATCAGCGTGTCCGACACCTACAGCCTGATCCTCCCCCTCAACAACCCCCTCTTCCAGATTCCCGTAATGGACCAGAGCACCAGCGTGCAGGGCATCCTGCAATCCGACCTCACCGGAGCCATAAGCATGAATATGATCAAGCTGGGCTCGCAGATCAGCCCCGGGGACACCATCGTAACCTCCAATCTCTCTACCCTCTTTCCCAAAGGATACCCGGTGGGAACCATCGAGCGCATCAAGGAGTCGAGCGACAACCTCTTCATCAGCGCCGACATCAGC…
9600	c_000000002376	146	470	r			ATGTGTCCACTGCGATTGTGTGATCGAACCATCCTCTCCAAAGACCGTGAAGGGGCCTGCGGGACCGGTGGCGCAATAATAGACCAGATAGTGGTTCACATTCACCGGATTGCCAGCCAGATCAAATGCAACGTCACCCCAGTCCAGCAGGACATTCGACCCGTTTATGCTAATGCTCAGGTTTCCCGGGGCTACGGGAATTCCGGCACCCGGGTGAATGCCAAGCTTGGCGACAAAGATATTTTTCGTTTGTGTTATCACATTTTCGTTAAGTATAATGCTCTATCGCTTGTGTTTTTCGTAATTGGCTCTCTTGCCGCATGA
9601	c_000000002376	557	1343	r	Beta-lactamase superfamily domain	PF12706	ATGTTCCAAACCTCAGTATTGGCCAGCGGATCAAAGGGTAACGCGATACTGGTGCGCAGTTCTGAAGCGGCGGTATTGCTCGACTCCGGCGTGTCCGCCAAATCCATTTTTAACGCTCTGGACAACCTGCGTGTAAGCCGTTCCGAAATCAAGGCGATCATCATCAGCCATGAGCATTCTGACCATACCCGGGGGGTGGGCGCCATCTCCCGCCTGCTCAAGATACCCATCTACGCGAATCTGGACACTTACGAGCGCTGTGCCGAAAGGATTGGCAGACTGGCAGAACCGGTACGATTTTTTGAGACTGGGGACAGCTTTAGCGTCGCGGACCTGCTTATCCATCCTTTTGCCTCATCCCACGACGCGGCCGACAGTTGTAACTTTACATTCAGGATC…
9602	c_000000002376	1346	2297	r	HD domain	PF01966	ATGGAACTGAACACAAAAGTATCTGAACTGCGGGAATTGCTCGGTAAAGAGATCACCAGTTTTTATCTGGTTAGCGAGAAAGAACTGCGCGAGGGTAAAAATGATTATTTCCTCCGCTTGAGGTTACAGGACAACAGCGGCAATCTGAACGCCTACATCTGGAAAGACGCCCAAAAAGAGGCGGATAACTTTTCCGAAGGAGACGTTGTTAAGGTCAGAGCCACAGTTACCAGCTATAAAGGCCAAACGCAACTGAACATCTCCAGGATTCGTTTTGCAGACCATTCAGAATACAATATCGAGGAGTTTCTGGTGGTGAGCCAACATGATCCCGAGATGCTGGCTGAAAAAATCTTCGCTTTTGTGGACAAGGTGGAGAACACGTTTCTGCACAAGCTC…
9603	c_000000002376	2302	2446	r			ATGAATTTGGCAGATAGCCAAAAGGAATACACACTCAACGCTTCCAATTTCCCAGCCTCCGGTGTCTATCTGCTCAGAACGGGCTATACAGACAGGCAGGGACGCAAACAAAACAGCGTAAACAAAATAATAGTGATTAAATAG
9604	c_000000002376	2582	3590	r			TCGCCCAATCAGACGGTTTTCCCCGCATTCACCATCTATAACCACTCTGATCAGCCGGTATCAGATGCCGTGGTGAATCTCAATCTATATTCTCCCAGTGCCGGGTATTCCTTCTTTGATCCCATCCAGATAGGGGGGACGATCCAGCCTCGCTCCATATTTATTTACAATTCCTCAAGTGCCGGATCAGAAGAGCATCAGATCACTCTGCCCGAGTATCCCCTACAGCTAAAGCTGCGGGCAAACCTGAACAGCCCAAGCCTGAGCGACGATCCGCAATTCAACAACACACGGATCATCCACAGATTCAGTTTTGCGGAACCTTACCCCTGCCATCTGGTGGAGAATTTCCTTTCCAACACAAGCCTCGCAGCCATATTGGGAGCTCAAGACCAGCTT…
9669	c_000000002392	153	777	f			ATGAAAAAGAGAACCCTTGTCGTTATCGTAATAATGCTTACGGCATTACCCTTAGTTGCCGGCAGATATGCCGGAGATTTTATGATGATCGGTGCCGGAGTTCGGTCACTGGGCATGGGAGGCGCTTTTTGCGCTCTGGCTGATGATGGTTCAGCTATCTATTGGAATTCGGCAGGTATTTCGCAGATAAGAGATTCTGAAATCATGCTGATGCACGCTTTCCTATACAACGGATTGGCATCCTACGACAACCTTAGTTTTTGCCAACCCCTCCCCAATGGTGTTACTATTGGTCTGAACGCCATCAGATTAACTGTATCTGATATTCCGCTTTTCGATGAGTCCTATCTGATAGGCACGAATGTAGACCAGAGGGTCAACAACAGCAATTATCATTTG…
9670	c_000000002392	743	1163	f			TTGGGATTCAAAGTTAAAACTGACATGGCAGTAATCTTTGATTGGGATGCGTTGGGCAAACTTGATTTCGGGATGAATTTTCAGGATGTGGCAGGTACTAATATCAGTTGGGACACCTATTCGGAACACAAGGACGAGGTACTCTTCAATACCAAACTGGGAGTAGCAATAAGTCAACCAATACCTGTTATTGATTCGGAACTCCTGCTTGCCTACGACCACGACTATGTATATGATGGGACGAGTCATTATGGAGTACAGTTCTCATACAAAAAACTGGGTAGTCTGAGAGCAGGTTATTACGATAAGAATTTCTCATGCGGAGCCAGCGTTAATGTTTATGGCGTAGGCGTTGATTACGCCCTGATTACCAACCCCGTTGGAATTACCAATCGCCTG…
9671	c_000000002392	1488	1950	f			TTGATAGATTCCGTTTCTGCCACTGCTCAATACTATCTGGATAACCGCAGTCAATTGGATGAGGGAGTCTGGTATTCATATTTCATCGACCTGGTTGACATGGCTGGCAATTCATCCCGTTCAGATACAGTGTCCTACGCTCTGTTATCTAAATGTATACCCGTGTATCCAGAACAAAACCAGGTCATCACCCCCACTCAGGGCACTTTTCAATGGTACCGAAGCGGTGAGGCCTCTTTATACAGGGTTCTCCTGATGGATGAAGACGGAAACTATGTGGGTCATCAAGATCTCTATGTGGCCACAGAAGAGAATCCTCTGCACGTTGTAATGCCCAATACCACACTGGATGACTATATAGGAAGAAGCCTGCGCTGGAGAGTCGATGCCTTCGATTGG…
9672	c_000000002392	2495	3071	f	SLBB domain	PF10531	GTGAAGAAGTATCTTCTACTGCTTGTTTTGATTGCTGTGACTTTGGGAGTCTTTGCACAGACAGGGACAGCCATAGTACCTTCCAGCAGTATCTCCGCCTATACCTATGAGGGTAACCGTAGTGGCGTGGAAAAGCTAAAAATGAACGTTTATATATTGGGACAGGTCAACAAACCAGGCTTGTACCTTGTTCCAGATGATACAGACTTTTTAACTTTGCTTGCTTTAGCTGGGGGTCCCAAAGAAGATGCCAAGCTATCTAAAGTAAGGATCATCAGACCTGCCAACACCAGCCTGGATGCAAAATCAAGCGAGAAAGTGATCTGGGTTAACCTCAAAAAATACATGGAAACTGCTGACAATAAGTATCTCGCAACTGAGCTGCGCACCACCAAGGAA…
9673	c_000000002392	3080	3506	f	Chain length determinant protein	PF02706	ATGGAACAGAAAAACGCGCCACTGCCGCAACAAGATGAGATCAAACTGACAGATTACCTCAGGATTGTACTTCAATATAGATATCTGATAGTCCTGATATTCATAATTGTGATGGCTTTGACTATAATCTATACAGCACGTCAGCCTCGTATCTACTCCGCGTCCTCAAGGATCCTCCTGGAAAACCAGACGACAGGGGCAGACCTCCTGCTCTTCACTACTCAGGGAACCGGAAAAAACTATATCAACAATCAGATCGAACAGATCCGCAGCAAGCCCTTGCTTTCTGCCGCTTGGGAGATCATGAAAAAGTATCCTGAATGGGAATCATTTCCCATCAGCGGCTCGGAATATTCTCCCAGCAGTTTGGGCAAGGTGCGCATCGAATCAAAAACGCGA…
9674	c_000000002392	3528	5367	f	AAA domain	PF13614	ATGGCGGCGGTAAATGCGATTGCCGAAGCGGTGGTGCAGCAAAACACTCAACTTGCCCGCTTGGAATATACCACTATCAGGGAATTCCTTGGAGAACAGCTTGACTTGATCTCCAGACGGTTGCAGATTTCAGAGGACGATCTGCGCGAATTTAAAAATGAGAACAAACTGGTTGAATTGTCAGAAACCACCACTAAATGGATTGAACAGTCCTCACAGATCGAATCCCAATATGAAAGCGCTCTTACTGACCAAGCTGTCAAAGCCAAAACCCTTGACTTGCTGAAGAAACAATTAAGGGATCAGGATTCATTGTTGGTTCAAGTGGAAAACGTTCTGCAGGCTCCTTACATTGAGGAATTGAGAAAACAGATAACTGCCACTCAAGCCACCATAGCC…
9675	c_000000002392	5415	6171	f	GHMP kinases C terminal	PF08544	TTGCAGTGTCTCTCTTCTGATACGCTGAGATATACTTTGACAAAAAACCAAGTGATAAAATTGTGTACCAATATCCCAGACTTGCCAGCTGAAGATAATCTTGTTTACAAGGTTGCATCCTACATGCTCAAGCGATACAAGCCTTCTGCAGGTGTTGAGATCGACCTTGAAAAACGCATTCCTTTGGCTGCGGGTTTGGGAGGCGGAAGTAGCGACGCTGCGAACGTGATCTTTAACCTGAATGCTATTTGGAACCTTAACCTCAGCCAGGCAGAGAAAGAAGGGATCGCTGCACAGTTTGGCAGTGATATCTGTTTCTTTTTACAGGGTGGGGTTGCTTGGGGAACCGGCAGAGGTGAGATAATCAGTCCCGCAGAGGATATTGAAATCGACCACATC…
9676	c_000000002392	6649	7072	f	Phosphoribosyl synthetase-associated domain	PF14572	TTGTGGTATCTCCAGATTCAGGGGGAGCAAATCGGGCACGGTCTTTGGCCAATAGACTTAACTGCGGTTTTGCCATCGGTGATAAAACGTCGCATTGGAAATGACGACCAAGCCGAAGTTCTGAATATTATTGGCGATGTTCGCGGTAAAACAGCAATCCTCTTTGACGATATAATCGATACCGGTGGAAGCCTGATCAAAATTGCCAAAGTGCTGCAGGACCGGGAAGCGAAAGAGATATACGCAGCCTGCACCCACGGCATCTTTTCAGGGCACGCGGTGGAGAATATAGCGGCATCACCCATCAAAAAACTGTTCGTAACAAACACCATTCCGCTCAGTGAGGAAGCTGAAAAATGTGATAAAATTGTTCAGCTTTCCTTGGCAGAAATGCTGGCG…
9677	c_000000002392	7120	7696	f	Ribosomal L25p family	PF01386	ATGATATATACCTTGGAAGCTAAAAAAAGAAACAATATCAAAAAAAGCGAACTCAATGCATTGCGCGCGCAAGGAATGATCCCGGCCGTGCTCTATGGCAAAGAGCTTAAATCCACCTCGATAGCCATCGATAAAGCCACCTTTATGCGATTCTATAAGAAGAGCTTTACCGAATTGACCTTCTACGAGATAGCGCTTGAGGGCAAGAAGTATCACACCATACTTAAAGACAAATTAATCCATCCCGTAACCAGGGATATACTGCACATAGATTTTATGCAGATTCAGGAATCAGCTCTAATGGAGTTTGAGTTACCAATCCAATTCGTCGGAGAAGCCGTGGGAGCCAAGGAAGGTGGATTCACAGATGTAATCCAGAGAACAGTAAAAATCGTTTGC…
9721	c_000000002405	0	942	f	Penicillin binding protein transpeptidase domain	PF00905	AACGACAAACTCAACTCCATCCAGATTTCGAACAAGATACGGGAAATGGAGCTGGACAGGATCATCAGCACCTTTGACAAAGAGAAAATTCCCGGCCTGAATTACAGCTTTTCGTCCATGCGCCGGATTTACTCCAAGGGAATTCTGGCAGCCCGTTTACTCGGTTCGGTGCAACCCGTTTCCGACGGATACGACCCGGAAACGAGGAGCAAGTCCCTTTATAAACTGAATGGAATATGCGGGATAGAGGCTTCTTTCAATGACCTTTTGGCTGGAGAATACGGCTGGCGTGAAGTGGTCTATGACGCCAATCATGAGCGGGTACCCTATCCCAACCTGCACGAAAAGCAATCCCAGGATGGATTCAACCTAAAACTGACGATAGATTCCAAAATCCAG…
9722	c_000000002405	938	1817	f	Penicillin binding protein transpeptidase domain	PF00905	GTGACCGCTTTGCAGCATGTGACCGCCTTCAGCGCAGTAGCGAACGGCGGCAAGATGATGAAGCCCTATATAGTGGATTCTATAACCAACAAAACCGGACAGGTCATCCAGCAGTTTGAGCCCGAGGTGCTGAGAGAAATAGCCAGCAAAGCCGTTACAGATACGATTCGTTCCTATATGAAGGCAGTGATTGACGACGGAACCGGCAAACACATTAAAATGGACTACATCACAATAGCTGGAAAAACTGGAACGGCACAAAAAAACGTGGAAGGCACCCGCGGCTATTCCAGCGGAAAATACACATCGGTCTTTGTGGGTATGTTTCCTGCCGAGGAACCCAAGATGGTGTTGCTGGTTTTCTACGACGAACCGGCACCCGGATACCACTATGGCAGC…
9723	c_000000002405	1813	2530	f	Mur ligase middle domain	PF08245	ATGAAGTTCAAGGAGATCCAGAATATACTCCTCGAAGATGGTCTGCTGCTGCAAACCCAGGCGGTGGATAAGCTGGTGGAAATTGATGGCAAAGTCTGCACCGATAACAGGGAGGTGTCCAGGGGAGACATCTTCGTCTGCATCAAAGGATTCCGCCAGGATGGGCACAACTATATCTCCGACGCCAGAGCCAGGGGAGCAGCACTGGTGGTCTGCGAGGACAGTTTTAAGGACGCGCATGCTTCGATCAGGGTAAAAGACAGCAGAAAGGCTGCCGCCCTGATAGCCAAAGTTTATTACCAAAACCCAAGTTCCAGCTTCCGCCTGATCGGGGTGACCGGCACCAACGGCAAAACAACAAGCTCTCTCTTGATCTTTAAAGCTTTGCGCGAATTGGGT…
9724	c_000000002405	2589	4668	f	Mur ligase middle domain	PF08245	GTGTTTTCGGTTGGACGCCAGCAGGCGGATTATCTGGTGAGGGATGACCACAACACGAACAAGGGATCGTGGGAGCAGACCCGTTTCACAATCACGCACTCTGGTGGAGAAATCCACATCCGCTCTGCTTTGATTGGCAAATTCAACCTGGAAAACCTCGCCTTAAGCGCGGCGGCTATGTCAATCATGGGTTTTGAATCCCGTCAGATAGAGCAGGGCATAAATGCGGTAAAACCCATCCGTGGCAGGTTTGAGAGGATACCAAATGAACGGGGCATTGGTGTATTCATCGATTACGCGCATACTCCCGACGCCATAGACAATGTGTTGAGAGCGGCAAGAAGCCTCGACCATAAACGGGTACTTTGTTTGATTGGCGCCGGCGGAGAAAGGGACAAG…
9725	c_000000002405	4886	5492	f	Glycosyl transferase family 4	PF00953	ATGGGCGGTCTGATTATCATCATTGCGCTTTTGTTTTCATCCCTGTTTTGGAACATAGTCGGCAATCGTGCGATCCTCTTGATGTATCTGACCACAGTATGGTTGGGTATCTTCGGTTTTTTGGATGACTATCTGAAAAACTTTGTAAAATCAAAGAAAGGCCTGCTTCCCAAATACAAACTCTGGGGACAGATCAGTATCGGTTTGCTGTTGACCCTGGCCATCTACTTCGGAAGCAGTGCCGGGGACAAGGTCACTGCTTTGCAAATACCTTTCCTTAAGAATACCTATATTGAATTGGGCTGGTTTTTCATCCCCTTTGTGGTCTTCTTTATTACCGGCACCTCAAATGCGGTCAACCTCACCGACGGATTGGACGGCCTGGCTGCCGGCATGCTC…
10282	c_000000002557	0	765	f	CTP synthase N-terminus	PF06418	CAGGAGTATGATATTGTGCTCACGGAGATCGGAGGCACGGTCGGCGACATCGAAGGCCTGCCTTTCCTGGAAGCCGTGCGCCAACTCCGCCTCGATCTGGGTGTGCGAAACACTATGTATGTTATGCTTTCCTATGTGCCCTATATCCGTGCCGCGGGTGAGCTAAAGACCAAACCCTCCCAACACAGCACCTACAAACTGCGCGAAATAGGCATCCAGCCCGAGATACTGCTCTGCAGATCGGAAATGCCCTTTGATGATGAAATATATTCCAAGATAGCCCTCTTTACCAACGTTCCCAAGAATCATGTGATCAACTCGATAGACGTTAAAAGCGTCTATCAGGTGCCGCTAACCTACTTGAATGCCGGTCTGCACAAACTGATCTGCGATCATTTC…
10283	c_000000002557	755	1220	f	Glutamine amidotransferase class-I	PF00117	ATGCAGGTAGCAGTGATCGAATTTGCCAGGCATGTCTGTGGCATGAAAATGGCTAACAGCACGGAATTTGATCCCGACAATCCTTACCCGGTGATCCATCTGATTGAAAGCCAGCAATATCTTGATTTGATCGGCGGAACGATGAGGTTGGGAGCGTATCCCTGCAAGTTGCTTGCCGAAAGCCTGGCCTGCAATGCCTATGGAACGGAGTTGATCAGCGAAAGACACCGTCATCGCTACGAGGTCAACAACGAATATCGAACCCAGTTGCAAACTGCGGGATTGAAGATCACGGGAGAATCTCCTGATGGCATGTTGGTCGAAATCGTTGAGATGGCAGGGCTGGATTTTTATGTGGGAGTCCAGTTCCATCCCGAGTTCAAATCGCGTCCCAACAAC…
10284	c_000000002557	1571	1880	f	NMT1/THI5 like	PF09084	ATGGCAAATGCCAAAGGCTACTATCGGGACAGGGGGCTCTCTGTGGAAATCCAATACGGGGGGCCAGACCATTCAGCCACCTCTTCTCTTAGAGACGGCTTTACAGATATAACTTGCCTAAGCATCTTCCACGCCATTAGATACAATGAGCAGGAAAAGCCATTGGTTTACCTGGCCCAGTTGTTTCAAAAAAACCCCAATATGTTGATTGGCAGAAAAAGAGCAGGCTTAAGTTCATTGGAGGATATCAAAGGCAAAAAGATAGGCATCTGGGGGGAGAATATGGAGAACACGTTACACTGTTTTTAA
10285	c_000000002557	1885	2245	f	NMT1/THI5 like	PF09084	ATGGATCTTGAAACAGAGTCTGTCAGAGTGAATTGGTCGGTTAACTTGCTATTGAGCAATGCCATCGACCTGAGCAATGTGATGACATACAATGAATACCATCGGGTCCTCATGGCTGGCCTTGACCCGGATGAATTGTTTATAGTGCCCTTTAGGGACATTGGTTATGATATGGTGGATGACGGGCTTGTGACCACAAAAGAGTTTTATGAGAACAACCCGCAGGCATGCCTGGATTTTACTGCCGCCACCATGCAGGGTTGGCTTTATGCTTTTGAGCATCCGGAAGAGGCTCTGGATGAAACACTCCGGATCATGCGCCAGTACCACCTTCCCGCCAATCGCAACCACCAGGCCTGA
10286	c_000000002557	2244	2409	f			ATGCTTGAGGTGATCAAAGACCTTGTTTTGGACCATCCCGAAGGTATCGGCGTCCTCAGCAGGAATGATTACGACAAGGTCTGCGATCTGATGGAAAAGCACAAAGTGATCAGAAACCGGATTGATTATGAGAGGTTCTACCCCTTTGCCCAGGAAAAAAAGTAG
10287	c_000000002557	2371	4297	f	Stage II sporulation protein E (SpoIIE)	PF07228	ATGAGAGGTTCTACCCCTTTGCCCAGGAAAAAAAGTAGAAGCCTCGCTTCTCAACTGATCATAGTCACCTTTGCAGTTTTGGTATTGGTGTTCGCCGCGTCTTTGCTTGTAACTCGCCACTTCGTGGGCAAGGTTATGCTGGAACATGCGCAGAACGATCTTGGCTTCCTGGCTCACAATAAAATACATCAGATCGAAATTGACATGAGAAAACTGGAAATCCAGGGTAAAATGCTGAAAGAGCTGCTTGCACTGGGTACCCTGGATGAGAGGGAGTTGCTCTCATTTATCGACAATCAATTTATTGAAAACAACCAGCTTCGTTCTGTCTGTATCGCCCAGGATCCAGTTGTGGGAAAACCTCCCGTTCTTTATCAGCTTTTGGCAGGTAAAACTATC…
10288	c_000000002557	4614	5346	r	Acyltransferase	PF01553	ATGAAGATGGGAAAGTTGCTGTCGTTGTTGTGGATAACGCTTTACTGCTTGTTTTTCCTGATCTCCCTTATCGCTTATCTGCCGTTGAGTCTGGTGAAACTGTTGGTTTCAAAAGAGTCGTATGTGCGGCTTTTTTATATCTTGGTCAGTTGGTGGGGCAGGGCTACCGTACGCAGCACTGGATCCCGGGTTTATATCGAAGGTCTGGATTTGATACCGGATAATGGCCGGCTCTGTTTTATAGGCAATCACCAAGGCCTGTTCGATATACCGGCTCTGTTGGGCTATCTGGGGCGCCCGGTTGCGTTCATTGCAAAAAAGGAACTGTTCAGGGTCCCTATTCTATCTCTATGGATGCGGGAGTTCAACTGCGTATTCATCGACAGAAAGAACTCACGC…
10289	c_000000002557	5355	6801	r			ATGGAACGATATCCGAACATCATCATTCTTTTGAATCTGCCGCAGCACTACATTCCCAAGGCTGAGTTTGTGCTGCGGACTTTTTGCTATATTCTGCGCCTGAATCCCAAATTCGTCTATGGCAGCGGACATGAAGGCGTGCACCTCTACTATGGACCCTATTCTGCCATCGACTGCCCCATCAAGATACACTATGATGGCTATAGTTCGGAGTTTTTTGAAAGACGCGAACTTTATCCTTTGGAAAAGGTCAACTTCTGTTTATATCATAAGGAGTACATTCCGTTTCTGTTTTCGCTTAACGGCGCTATTTTCTCCTTCAAGCCGGAATCTGTGATGATCCGCAAGGATATTGTGGCCAGCGCTTTCTACTTTCTGACCTGTTGGCATGAATACATA…
10290	c_000000002557	6810	9060	r	Lon protease (S16) C-terminal proteolytic domain	PF05362	ATGCATTATCCCAGGATAAGACAATGGCCTTTTTCCTGGAAAAAAACAAAAACTGAGCCCAATGATATCGGCCTTTACGAGATCGGCACCTCGGTGACCATATTGAGGATGCTGCGCAACCAGGATGGTTCGATCAGCCTGCTTTTACAGGGAACTTCCAGGATACGCATGCAAAAAGTGGTTCAGCGCGAGCCTTTTATTATGGTCGATGTGGAAAGTATTGTGGAATCCAGCGTGGAAGACACAGAGATACATGCTTATCGCACCATTGCAGTGGAACTGATGGAAAAGATCGCTCAGGAAAGCACTGTGCTCAACCCAGAGATGATCGCTGGTTTGAACAGCATTAAACAAGCTGGCAGGGTAGCAGATATCATAGCTGGTAACCTTGAATTGCAA…
10291	c_000000002557	9004	9211	r	ATP-dependent protease La (LON) substrate-binding domain	PF02190	ATGACTAATATCAGGAGAGAGCAGATGGAAGATCATAACAACAGGATTCCGAGGACACTGCCAGTATTGCACATTAACAATGTGGTGATGTTTCCCTATTTGTTGATGCCATTGGTGGTTTCAGACGATGAATCCAAGCTGGTGATCGATCATGCATTATCCCAGGATAAGACAATGGCCTTTTTCCTGGAAAAAAACAAAAACTGA
10292	c_000000002557	9385	9964	r			ATGCTGTTTCTAAAATCGTTAACCTTTATCATTTGGAATATTGCGCTGGGCACGCTACTTGTCTATGCTTTAAAGTGGTTTTTGTTCAATAAAAAGCAGCGTAAGCTCTTTGGCTGGAAGATACCGCTCACGCCGGGTTTTCTGGTGCGCAAGAGAGACTGGCTGTTTACCAAAGCCAGAGATATGTTGCATGACTATCTGAATCAGGCTTCAGACAGAATGTACACAAACGGATACCTGAAGGATTGGGAACAGAAGGTCTGGCAAACAGCTTGGGACAATTTTGCCTTTGTGTCTGACTGGCCTTTGTTGCCCAAAGCATTCAAAGCGAAAATCCGCAACACGATTGCCTCGCTCGCCAAGGATCTGGTTTCCAAAATTTTGCGCAAAGTTGTTCCC…
10293	c_000000002557	10010	10370	r	GTP cyclohydrolase II	PF00925	TTCGAGCTGATCGCTTCCGAGGGTCGCGGAGTTATCCTCTATATGCGCCAGGAAGGACGGGGTATTGGTTTGGTCAACAAACTGAAGGCTTATCATCTGCAGGATGAAGGAAAAGATACTGTTGAAGCAAACCTTGACCTGGGTTTTCCCGCGGACCTGAGGGATTACGGCATTGGCGCCCAGATCCTGAAAGATTTGGGACTCAAGAAAATCCGCCTGCTTACCAACAATCCCAAGAAGATCGTCGGACTGCAGGGTTATGGCTTGGAAGTGGTGGAACGCAGACCAATAGAAATCAAAGCCGGTGAAAACAACCGGGATTATCTGAAAACCAAAAAAATAAGATGGGGCATATCCTGA
10473	c_000000002605	2	956	r			ATGTGGACATATACCACAGCCTCTCCCGCCCGGGCCAGGCAGAGCAGAAACGACAATTACCAGCCTACTTCGCTGACTGCCAGCACCAATCTGCCCAACCTGAAGCTGAAGATCTTCCCCACCCCGGGAATGCTCTATCCACCGCGGGAGCTGACCGCAGTGCCAGGTAACGGTTATGTAACACTCAATTGGCAGGCACCGCTCATTGGTACCCCCACAGGTTACAGGATCTATCGTGATGGAAGCTTGCTTACCACAGTCACCGGGCTCACATACACCGACAACGCGGTGGTCAACGAAACCACCTACAGCTACTACCTTGTAGCGGTATATTCCGGCGGAGTATCCGATCCCACCGACACAGTGCAGGCTACACCCTCTGCCATCGTGCCCACTGAA…
10474	c_000000002605	1265	3863	r	Peptidase family C25	PF01364	ATGCTGCGCAGGACTATCGCCGTGCCTTTGGGCGCGGAAGTCCGTTTCTATCTCAATTCACAATCCACGCGGGAACTGGACAGCAAAGCCAGCAAACTGCAAAACCGCGTCATTCCGGCTCAGGAGCCCATCTCCAGAGCTGCCGATCCCGCCACCCTGCCCTTTGAGGTGAACGAAAGGCTTTACAGCCTCGACGAGTTCAACAACCGCGACTGGGTGCAGGTTACGGAACTGGGCATGATGCGCGGCGTACGGGTTTTCGCCCTCGATTTTTACCCTGTGCGCTACAACCCCGTCACCAACAGTATCCAGGTGATGGAAAATGTGGATGTCCGGGTGGATTTTGTCAACCCAGACCTCATCGCCACCGCTGACATGCTTGCCAGGACAGCTTCCTGG…
10475	c_000000002605	3921	4137	r			CTTATGAAAATTAAGCTCCCCGGCAAAGCGATCCTGCTCATCGGGCTGATCCTTGCCTGCGCTTTCGCGCTATCTGCCGCAGACCGGCAGGTCAATCTCTCCTCCTCTGGCAACCAAGCCAGGCTTCTCAACAACAGCGACCTCGGTTTTGATGTACAATTCCGGGTTGGCGACCTGAAAATCATGGAAGTCCAGACCAAAAAAAGGCACGTTTGA
10641	c_000000002644	508	955	r	NfeD-like C-terminal, partner-binding	PF01957	ATGCACGGTATCCTTCCCTGGCATATATGGATCATCATCGGAATCCTGTTTATCATTATTGAGATTCTGGATCCAGCCTTTTTCTTCGTCGCCCTGGGCTTCGGGGCGATCCTTACCGGTTTACTGAGCCTGCTGCCTTTTGTGGAAGCGAGCATCCCGTTGCAGATCATCATCTTTGCCATCCTCAGCTTTGTCGCCTTCCTGCTCACCCGCCATCTGGGCAAAAAGTTCCTGGCCAACGCGGGCGGGGAGACCAACGTCTTCGCCCTCAAAGGAAAGGAAGCCCACGTAACCGAAATAATCCCTGCCGACGGCAAGGGAAGGGTGAAAGTGGGCAGCGAGGAATGGGTGGCAATCGCGGAGGATAAAGGCGAGATCGCCATCGGCGCCAAGGTCGTG…
10642	c_000000002644	972	1476	r			GTGCGACGGAAGAACAGGTGCTGGCTTCCAAAAGGATCGAACTGGCACGCCTGGAACAGGAAAGCTCCTACTACGGCAGCGATTTGGACAATAAAAAACACCCGCATCGCCGAGATTCGCAAGCTCGAAAACACCATCGACCTCCTGAAAAACAGCGACAAGACCCTGCTCTATGTGAAACTGCAGACCTCATTCAGCGGCAACAGCTTGACAACCGTGAAAGATTTTGTCAGAAACTTCGCTATCTTCCTGGTTGGGTTCTTCATCTTGGTGATCGTGGCTTACTATGGCACCAAGCTGGTCATGTATCTGCTTTCGCTGATGGGTTTCAAGGGGTTCAGCATGTCCAATTTTGGCGGCAGCTATCAATATGGAAACTATGGCAACTATGCCAACCGC…
10643	c_000000002644	1877	3581	r			ATGCTGAACGAGATTTACATCCGCAATTACCTCTTCGTGCCGGAGCAACGGCTGAAGTTCGGCCCGGGAATGACCGTATTGAGCGGCGAAACCGGGGCGGGAAATCCATCCTGGTCGGCTCGATCTCCCTCATCTTTGGCGAAAACGCCCTCCCCGCCGGAAGCTTACGACCCCAGCCAACCCATCTATCTGGAAGCCAGTTTCGACCCCGGGGCGAACAGCGAGCTGCGGGACTGGCTGCGCGAGCAGGAACGTGATCCGGAGGAGGAACTCTGCCTGGCGCGGGAAATCAGCGTCGCGGGCAAGTCCAGCTACTTCATCAACGGCCGCAGGGCCTCCGCCTCACTGATGCGGGAACTCAAGCCCCTGATCATCGACTTTCACCACCAGCGCGACCAG…
10644	c_000000002644	3581	3917	r	ATP-NAD kinase	PF01513	GTGATCGCCAGCACCCCCACGGGCTCCACGGCTTATTCGCTATCCGCCGGAGGCCCCCTGCTTTCCCCCGAGATGCAGGCCATCATCCTCAGCCCCATCAACCCTCACCTGCTCAGCATCCGGCCGATGGTCTTCCCCGCCCGCGACCGCATCCTGATGAAGGTCTATGGCCTCGGCGAGCCCGCCTGGCTGCAGGTGGACGGCGTGAACTGCGTGCGCATCCAGGAAAACGACGAGGTGCTGATCACCGCCAGCCGGCAGGTAGTCCCCTTCATCAAGCTTTCCAACCGCACTTTCTACCAGATTCTGCGCAAGAAGCTGCACCTGGGCAAATAG
10645	c_000000002644	3972	4479	f			ATGAGGCGGGGCGTTTTCCGCCTTGTAGATCACGGCATCGTTCAGGGCGAGGTTGTGATAGATTATCTTTCCCTCCCGCTTCAAATGGCAACTGATGAGCATGCGGTTGAGCAGCTTGTATTTGCAGTTGAGCAGGTCGCGGATGGAGGCCTTGAGCTCGGTGAGGGTGGTCTCGGAAAGGAAGCCCAGATAGCCCAGATTGATGCCCAGGATGGGGGCCTTGGTCTGCAGAGCCAGCTTTTTGGCCCGCAGGATGGTGCCATCCCCGCCAAAGACCAGCACGCAGTCTATCTGGGGCAAAGGCTTCCACTCCAGCGAGAACACGCGGATGAAGTCGGGCAGGATGTTACGCTGTTCCTGCAGTCCGTAAAATATTATATCGTATTCTTCCGCCAGCTT…
10646	c_000000002644	4755	5511	r	RsgA GTPase	PF03193	ATGAAACAAAAGGACAAGAGACGGCAGCGGCCAGCATCACACACGAGGCTGAGGAACATCAGTCTGCCCGATCTTGACGTCCTGGACGATGTGCGGGAGAGAACGGAATTCAAAACCCGCCGCACCGCCCTGAAGCAGCACGACTCCTTCAAGGTGGACGCCGAGCTGGTTCCGGGTAGGATTCTGGAGATCAAGAGCAATTACCTTTACATCGTGGAGGCGGGAAACGAGACCCATACAGCCACCCTTTCCGGCAGGCTCAGGCAGTTCCTCTATTCCAGCCGCACCCTTTCCGCGGTGGGAGACAGGGTGGAACTGGACACATCGGTCTCGCCGGACTATCGGATAGAGAACATCCTGCCCCGCAAAAACACCCTCTCCCGCTACAGCCAGGGCAGT…
10647	c_000000002644	5515	6217	r			GTGCTCAGCCTCACCGCTGCGGAAGAGGAAATCACCTCCGCCTCCGCCTGCCTTAGCCCGCTCACCGGAGCCTTCTCCACCCAAGCCTGCGAAGCGGCCAAAATCCCCTTCCAGGAACAAAACATCCGGGAAGGCATCCTGGCGCCGGTGCAAATCCAGTTCTGCGTGCAAGGGGGCAACTTCTTCCGCAAGGGATACTCCTATTCCGGCAAGATGGCGGTGATGAACAACATCCTCAGCAACGAGTTCCTGCACCGCGAGATCAGGGAAAAAGGCGGCGCTTACGGCGCCTGGTCAAATATTGGCATGACCGGATATTTGTCCTTCGTTTCCTATATGGATCCCAACCTCAAGCAGACCCTGGACGTTTACGCCGGAGTGCCGGAGTATCTGAGGAAC…
10648	c_000000002644	6161	6977	r	Peptidase M16C associated	PF08367	ATGAGCAAAGATGAGATAGACGGCCTGGTGGAGTTTAACCGGAAGTTCGCCGCCTGGCAGCAGGAAGAGGTGAGCGCCGAAGACCTTGCCAGAATCCCCAAACTCGACCTGGCGGACATCAATCCCAAATCCGATTCCTATCCGCTGGAACTTGACCGGAAGGACGATTACTGCCTGCTCAGGCATCCCGTGAACACCAACGGCATCGTGTATCTGAAGGCCTATATTGACTTGCGCCAAGCCGCCGAAGAGGACTTCTCCTGGCTCTCGCTCTATTCCTATCTGGTAGGCAAAATGGACAGCGCCGGCCACAGCTACGCGGAACTATCCAATCTGATCGACACCCACACCGGCGGGATCAGCCTCGCGCTGCGCTTTCTGAGCAATTACCAGGATCCG…
10649	c_000000002644	6963	7029	r			GGTGTGAAGGAGCAGGAACTGCGCGACAAAACTGGCAGCCCGCAAAGCGAAAATGAGCAAAGATGA
10694	c_000000002661	1	1702	f	Histidine kinase-, DNA gyrase B-, and HSP90-like ATPase	PF02518	AAAGACCTACGGGGCAAGTGGGACGACCTGCTGCTCAATATCGCCAACATCAACAGTGTACAGCGCATAAAGTTTCTCATCGAGAAAGGCATAAATCAGGTTCTTTCGCCCTGGCAGTTCCGCTTGATGGTCTATTCGGATAAAATCGCGAATTATTATGCCTTCCAGTGTTACAATTGCGACGAGGAGCAGATGTTGCCCCCTGAGTTCTCAGCTCATATCGAACGTGCTTTTGAGACAAACAACCTGGCAGTGTTCGACTATCTGGAGCAACACTATCTCATCATCCCCCCTGATTTCCGGGAGCAAAAAAAGATCGGTTATCTGGTGCTGAATGACGCGGGCGAGATGGAGTTCAACTCCAGGGAAATCACCATTGCCAGAAACATTAAAACACAG…
10695	c_000000002661	1740	2484	f			ATGCATAAATCTCTAATCCTTATCAGCACCTTGATCGTGTTTATGGCATGCGTGTCCAGCCAGATATCTGCCCAAAGTATTCGCGAGCAGGAAAACTTTGACTACATCCTGGCGCTATACAACCGCGAGGGAAGCTATCTACAAGAAGCCAAAGTAGAAATCGACAGCTTCCGCAGCCAGTATCCGAATTCAGTTTACAGTGTGTATCTGGATTATCTGCGCGGAAACATTGCGCTCAAGCAGGGAGACTACCAGCTCTGCCTCGAGCTCTACCCCACTCTGTTAGAACAAGCGCTGCATCCGGACATCCTGGCCGACATCCATCTGAATTACTCCATAGCTCTTTATTACAGCGGTGATCTGGGCACCTCGTTGCAACAGTTGGAACGCTTGGAGAAA…
10696	c_000000002661	2480	2990	f			TTGAAAGTGCGAGAATCCCTGGAACAGGGAAACTTCCCGCTGGCAGACTCGCTGTTGGGAAGCATAGTATCAGCCTCAGATTATTACAGCTACTACCTAGCCATAGTGCTAAACTGGCGGGGAGAAACATTAGCGGCGGATTCTTTGTTTAAAAACCTGCTCCATTCGCCGGAGCCTGATCTGGGCTATTATGCCTATCTGGAGCGTCTGAAGATACTCTATGAGCGTGACCCGCAATCAGCCATCATGCAGTTGCAGAGCTATATCTCATCGGGCAGCGTCCAGGATGGGGTGCAGCATCATATTTTGGGATTCTTTCATTTCCAAAGCAAGAACTATCTGGAGGCTGTGCGCTCCTTCCTGCAAGCTGATGATTTTGACCTGCCAGCCGATATAGCT…
11060	c_000000002755	0	354	r			ATGATCCAGTTCAAAATCCTGTCCGCTGACGGCGCGGTCGTAGTTGTAGCCCAGGTTTACGCGGGGAAAGTAGCCCAAAAACACCTGATTGCCGCTCAGTTCGCTGCGCTTGATATCGGCTTTGAGGAGTTTGACGGCGGTGCTGTTTTCCACGCCGCATCCTTCGGTCTGAAAGTCCGGGTTCGGCTCCAGGTCGGCAAGTTCGTAACCTTCATCCTGCAGCGAGACCTGGGCAAAGAGCTGCCGGCGCTGGGTGGAGATGGTGTTTTCCAGTTGCAATATCGAGATGCGGGAGTTCATCACCGCGATCTCGGCTTCCTTCACGTCGTAGGCGGTGTTTTTGCCCAGTTGGTT
11061	c_000000002755	407	782	f	Outer membrane efflux protein	PF02321	TTGCGACAGAGCCAGGTGGACAAACGCTCCGGCATCGGGCTACGCCTGGCAAAGCTGGAACTGGAAAACCAGATCGACGAACTGCGGGTGCAGTATGAGACCATGAACCTCGAACTTGAGTACCTGCAAAACCTGGACAGGCTCTACCGGGAAAAGCTTGACCAATCCACCGAACAGATCAGGATCGCCGAAGAACGCTACCGCCTGGGCCTCATCGAACTGCTGGAACTGGACAAAACCCGCGTGGAATACATCAACTCCGACATCCAGTACAACAACAACCGCTATCAGATCCTGGCCAAACAGGAAGCCATCAACACCCTGCTTTCCCGGAAAACTGTTGGGCAAATGGTAAAAAAAAAGAAGAGCACATGA
11062	c_000000002755	778	2164	f	Barrel-sandwich domain of CusB or HlyD membrane-fusion	PF16576	ATGAAAAAAGAAATACCTCAGATACACCCTCATCGCCCTGCTGATAATCGTCGCAGTGGTGGCCTATACCCAAATCCGCAAAAAGAGTTCCCGCCCCGAGTGGCGGACAGACAAACCCTCGATGGGCACGATCCGCGAAGTGGTGACCGCCACCGCTCCATCAACCCCTATGAGTTGGTGGAGGTGGGCACCGAAGTCTCCGGCCGCATCGACAAGATTTACAAGGATTTTAACGACAGGGTGCGCAAAGGCGAACTCCTTGCCAAACTGGATACGGAAATCCTCAGCACCAACCTGGAATCCGCGCGCCTCGAGGTGAACAAGGCCAGGCTGTCCCTCAACAAGGCCAGGCTGGACTTTGAAAACTACCAAGGCCTGGCCGCCAAAGGCTACGCGCCC…
11063	c_000000002755	2190	2571	f	ABC transporter	PF00005	GTGCGCGGCCTCACCAAGACCTACCAAATGGGCGAGGTGCAGGTGCACGCCCTGCGCGGCATCGACCTGGACATCCGGGAAGGCGAGTTCATCGCCATCATGGGCGCCAGCGGCTCTGGAAAGACCACCTTCATGAACCTTTTGGGTTGCCTGGATCACCCCAGTTCCGGCTCCTACAGCCTGGATGGAGTGGACGTGCACAGCATGGACGACGCCGAACTCACCCGGGTGCGCAACCAGAAGATAGGCTACGTGTTTCAGAGTTTCTACCTGCTGCCCCGCACAACCGCCCTGGAAAACGTGGAGCTGCCCCTGCTCTATTCCAAAAAGTGCTGCCCAAAGACCGCCACGCCATGGCTCTCAACGCGCTTGGCGCCGTAG
11064	c_000000002755	2543	2864	f	ABC transporter	PF00005	ATGGCTCTCAACGCGCTTGGCGCCGTAGGCTTGGACGAACGTGCCAAACACTTTCCCAATCAGCTCTCCGGAGGCCAGCAGCAGCGGGTGGCGATCGCCCGGGCCATTGTGAACGACCCCGTATTCCTGCTGGCGGATGAACCCACCGGAAACCTGGACACCCGCACCAGCGTTGAAGTGATGGGGTTTTTCCAGAAGTTTCACGCTCAGGGCAAGACCGTGGTTCTGGTCACCCACGAGTTCGATATTTCCCAATACACAGAACGGATAATCACCTTCCGGGATGGCAGGATCATCTCCGACGTTGCCAATCCCAATCCC
11158	c_000000002778	2	74	r			ATGCACGGCGATGAAACCACCGGCTGGATGCTGATGCTGCGCCTGATCGACACCCTCCTCAGCCAGTATGGG
11159	c_000000002778	60	549	r	Zinc carboxypeptidase	PF00246	ATGAAACAACTACTGATATTGACCATTCTGGTTCTACTCTCCCTGCCCCTCGTGGCAGGGGAGTGGACCCAGTATTACTTCCGCTTTGAACTGCTGGACAAAAGCGAACTGCAAAACCTGACCCGGATCGTCTCTATCGACAACGTCAAAGGCAACTGGGTCTATGCCTACGCCAACGACAGCGAATGGGCGGAATTCAGAAAACTGGGCTACAACACCCAGATCCTCCCCGATCCTGCCAGCCTCTATCCTCACAAGACGAACGGCAGCGTGAACGAAGTGAAGGCGTGGGATAGCTACCCCACCTACGACGCCTATGTGAGCATGATGAACGGCTTTGCCAGCGACTATCCCGGGCTTTGCCAGATCATCAACGTGGGCACGACGGCAAACGGCCGC…
11160	c_000000002778	569	1061	r			GTGACCATCTATGGCGTGGCAGCCGAACTCAACGACGTGGTCGGCGCCTTTGTGGGCAGCGAATGCCGCGGCGTGGCGGATGTGGTGACCAATGGCGGAAACGCCTACGTGACCCTGGTTGTGAACCTGGCATCCAACGGCGAAGAGGTCAGCTTCAAGATCTACGACTACAGCGCCTCTCTGGCCTACGATGCCATCGAGACCTACACCCTCAACTACAACCAGGTGATAGGCACCACAGACAATCCTGTGCCCATCAGCGTGGTCGAGATCACCTCTCTCGACGCTCCCGTGATCACCTCCATCACCAAGGTCGATGGCGGCTTCAAGGTCACCTGGAACGCCGTGGACAACGCGGAAAGCTACCAAGTGTACCGTGCCACGGATCCCTATGGAACC…
11161	c_000000002778	1057	2269	r			GTGGCCTCCTACAACGGCAACGTGGTGATTGCCAACAACTCCATCAACAACACCAGCGTCAACATCGCGGTGAGCGGCGCGGGCTACAATCCACCCACCATCGATATCGACAACGACGCCCTCTATGCCTACCTGCAGGTGGGCACCGAAGGCACGGACAGCTTCACCATCACCAACACCGGAAGCCAGCCTCTCACCTTCAGCATCAGCATGACTGAACTGCCCTCCAGAACAGGCAACCTGCTGCAAGCGGCTTCCGCTCAGGAGAAGAGCATCGCGGGCAGCACCCTCACCCTGGACGCCAGCAGCTACCTGCCCGGCACCACGGTGGACTGGACCTTTACCGCCACCAACGCCAGCACGGACGTAGAGTGGCTCAGAGACGTGATCATCAGCTTC…
11162	c_000000002778	2241	2487	r			GTGGCCGTGGGCAGCACCGACACGAAGACCTTCACCATCCAAAATAGTGGCGATCAGACCCTTACGGGCACCATCACCACCCCCGCCGGTTACACCGTGGCTGCGGCACGCAATTCCACGGAAGCTCCGCTGGCCGGAAAGGAAAGCCGCAACAGCTTGAGCTTCAGCATCAATGCCGGCGCTACCAAGACCTACAACCTGACTTCGCGCCCACCGCCGTGGCCTCCTACAACGGCAACGTGGTGA
11163	c_000000002778	2440	4636	r			GTGCTTCAGTTCAGGCAAAACGACGCCTACGCGATCACGATCGCCAACAACGTCCCCGATGGCACCGTGGCTAACTTCACCATCACCATGACCATGAGCGGCTACGATCCCTGGACTTACAACTTCAGCAAGACCATCAACGCGCCCGCTCTGGCCTTTGGCAATATGACGATCAGTGATCCCACCGGCGATAACGATGGCCTGCTCGATCCGGGGGAGACCGCCACAATCTCCATCGTACTGAATAACTCCGGGGGAGCTGCCTCCCTGGCTGGCTCCGGAACCCTGACCTGCTCCACCAGTGGCATCACCGTGGTGAACGGCAGCGCCAGCTTCACTGCTATTTCCGCAGGTGGCTATGCCACCTTGAACTTCACTGTGACAGCCGCCTCCTCAATG…
11164	c_000000002778	4950	6681	r	Peptidase family C25	PF01364	ATGTCATCTTCCGCCACCGAAACGGTTCTTCAATACCGCATCGGTAGTTTCGAAAAGATACCTGTGAACATTGACGGTAGCGAATGGTACCATATTCTGATGCCAAAGGAAGGCGTCAGTCAGGAAAAAGGGTATCCCCAGCTTCCGGTGTTCAACCGCAGTATTATCATCGATAACAACGCCTTGATGGCTTTAGATGTCTATGATCTTGAATATCAGGATATCGAATTGCCAGTGGCTCCATCCAAGGGTGTCATCACCAGGAACATCGATCCTGCCACGATACCCTATGTATTTGACGAAGTTTACAACAAAAATGCGTTCTATCCAGCCACTCCGGCCGAACTCTCCGATCCTTATATAATGAGGGACTTTCGCGGCATCGTGGTTAAGACAACT…
11165	c_000000002778	6800	7940	r	SRP54-type protein, GTPase domain	PF00448	ATGAAGTCCCTCTCCCCCGGCCAGCAAGTCATCAAGGTAGTATATGAGCAACTGGTTGCTTTGATGGATACGGAGGGATTTGAATTTAAGGTTTACAACAACAGGCTTACCAAAGTGATGATGGTTGGGCTGCAAGGATCCGGCAAAACCACCGCTTGCGCCAAGCTGGCACTGCATTACCGCAAAAAAGGCTTCAGCACGATGATGGTAGCCTGCGACGTTTACCGTCCCGCCGCTGTTGATCAGCTCCAGATTCTGGGAAAACAGATCGACATTCCTGTAATTGCTGAGGACACAAAAGACGTAATCAAGATTGCCGATTCTGCCCTGCGAGCCGCGCAAAAAGACTATCGGAATCTGCTCATCTTTGATACTGCGGGACGGCTGCATATCGACGAA…
11166	c_000000002778	7939	8131	r	SRP54-type protein, helical bundle domain	PF02881	ATGTTTAACAACTTAACTGAAAAACTGGACAAAGTCTTCCGTAACATCAGAGGACGCGGTTATCTCACCGAGCAAAATATCAAGGATGCTCTGCGTGAAATCCGCATGGCCCTCTTGGAAGCAGACGTAAACTTCAAGATCGTAAAAACTTCATCGCCGAAGTTGAGAAGCGCGCCCTTGGTGTGGAAGTAA
11642	c_000000002897	1	796	r			ATGAGATACTTTTTGTTTATCCTGGCCGCACTTGCCTTGATCACGGCTGCTTGCGACATCAGCTCTCCGCGCCTGCCTGCCTGGAATGTGGATCTGAATGTCCCGCTCACCAACCAAAGGCTTTATGTGGCCGACCTGGCGGATTCAGTTAATATCATTGTGGGCGACGGCCAGATCCTCACCCTCACCGGTACCGGGGAAGCCAGAACCAACCCCTTCGGGGAGGTCAACTTTACCCCCAATCTGCAGACTCCTCCCATCCCGCTGCTTTCCGGGGTGGTCCATTCCGGCACGGTGCCCATCGAAGATCCGGAAGGCAAGGTCTTTCTTTCCTACGGCCGCCTGGAAGAAGGGACTCTAAAACTTAATTTTGAAAACATGCAGCCTGGAATCACCAGC…
11643	c_000000002897	886	2389	r	Ribonuclease-III-like	PF14622	TTGGGCGACTCGATCCTGGGATTCATTGTGTCCAGGGAACTCTTTTTCGGCCATCCCGACGAGCAGGAGGGGAAGCTGAGCAAGCTCAAGTCCAAGATCGTATCCGAGACCTACCTCACTATGCGCGCCAAAGAGATGGACTTGGGCAAATACATCCTGCTCAGTCCGGAGGAAAAGCTCTCCGGTGGGGCCAGCAAGCCTTCCATCCTCAGCGATACCGTCGAAGCCCTGATCTGTGCCATCTATCTGGACCGGGGAATTGCCTCAGCCGCCAGCTTCATCAAAAACCAGCTCCTGGTCGATTACGAAACCACCGTCACCCGCAACGAACTGGTGAACTACAAAAGCATCCTGCAGGAGCAACTGCAGTCCCAGAACCAGGAACCTCCGCACTATGTG…
11644	c_000000002897	2421	2685	f			GTGGTCGTCGTAATTGCGGCGCAGATAGGATTTGTGGGTAAGCGCGGCCTTCAGCAGGGTCAGGTCGTGAAAGCTGTAGCCAATGGCTTTCTGCAGTTGGTGGAGGCTCTTTTCCCACTTGGGGTAGGTCTCGCTGATCCGCTTGCCGTTTATATAATCAACGATTTTCTTGATAATGCTGTTCAATCAATCCTCGGTGCCACCCTTGGGCGGCTACGGAAAGACAAGGCGGCAGGGGTGAACCCCGCTATTGGTATTTTGTGA
11645	c_000000002897	2668	3907	r	Beta-ketoacyl synthase, N-terminal domain	PF00109	ATGAAAAAAAGAGTGGTTATCACTGGCATGGGAGCGATCACTCCGGTCGGCAACAACGTTGCCGAGACTTGGGAAAACCTGATCAAGGGCGTTTCGGGGGTGGAATTGATCTCCAGTTTCGACACCTCCGCGCTCAACACCAAGATCGCCGCCCAAATCAAAAACTATGATCCGGCAGAACACTTTGACCCCAAAGAAGCCCGCAAGATGGACATTTACACTCATTACGCCCTGATCGCGGCACGTGAAGCGATCAGGGATGCCCAGCTTGAGCCTGGCTCCTACAACGGCCGCCGCATCGGCGTGATCACCGGAGTGGGCATCGGCGGGATCATCACCTTTAACGAAGAATGCGTCAAGAACCACGTCCAGGGGCCGCGCCGGATCAGCCCTTTCTTT…
11646	c_000000002897	4053	4287	r	Phosphopantetheine attachment site	PF00550	ATGGATATTGAAGCCAAAGTGAAACAGATAGTGATGGAAAAGCTTGGGGTGGAAGAATCCCAAGTCGTTCCCTCCGCGAACTTCATCGAAGACCTGCGCGCCGATTCCCTGGACACAGTGGAACTGGTGATGGCCTTTGAAGATGAGTTCCAGATCACGATTCCCGATGAAGACCAGGAAAAGCTCCGCACAGTCGGACAAGCCATCGATTACCTCAAGGAAAAGCTGGCTTAA
11647	c_000000002897	4515	5082	r	short chain dehydrogenase	PF00106	ATGAGTTATAAACTGGAAAATAAAGTAATCGTGATCACCGGCGGCGCCCGCGGCATTGGCTTTGCCATCGCCGAAACTTTTGCCGCCCAGGGATCTGTGTTGGTGTTGATCGACCTGAACCAGGAGCAGGTGGAGCGATCCGCCCAAGCCTTGGTGGAAAAGGGCTGCCAAGCCTTTGGCTATGCCGGCAATGTGACGGACTCAGCCGGGATCGAGGAACTCTTTGCCCGGATCGTGGAAAAGCATGGAGCCATCGACTGTCTGGTAAACAATGCCGGTGTCACCCGGGACAACCTGCTCATCCGCATGAAGGAAGAAGACTGGCAGCTGGTGCTGGACATCAATCTAAAAGGCTCCTTCATCTGCACCCAAAAAGCTTTCAAATACATGATGAAAGCC…
11648	c_000000002897	5227	5671	r			GGGAAACCTTTTGCCATGGCGGCGGTGATCGGGCTTAATTACAAGTCGGTCATCGAGGTGTGCCATGAAGCGGAGGGAGCCGGATTGGTGAGGGCGGTGAACTTCAATACCCCCATCCAGACCGTGATCTCGGGAAGCGCCCAGGGCGTGGAAACGGCTTCCGCCCTGGCTAAGGAACACGGGGCAAAAAGGGTGATACCCCTTGTTGTGGGTGGCCCCTTCCATACCCCGATGATCGATCTGGCCAGCGTGTGGCTGCGGGAGGAGATGGAGAAAGTCAGTTTTAAGGACGGGCAAATCCCGCTGGTTTCCAATTTGGATTCCCGCCCCGCAACCTCCGGAGAGGAAAGCAGGGCAAAGCTCGTGCGGCAGGTTGTTTCCCCGGTTCTCTGGGTGCAA…
12085	c_000000003034	0	651	f			TTCATCTCCCGTAAGACCCTGCGGAAGCTTTCCTACGCCGCGTTGCTGCTGCCGGTGATGTTCTACTTGGGGCTCAGGCTGAACCCATCTTTTAATCCGCAGAAGAAAATTTGGGGCAGTTTTGATCCGGGATATGCCATGGATTTTATCCTTTCATACACAGGTGTATCCCAGGAAAAGAGGGAATCCGATTTAGCGCGGGGCAGATGGGGAACGGCCATGACGGTTATACCTTCGTTCGTTTCCAGTCCGTTTGAAATAAACAATCTCATAGGCTTGCCCAAAGCCAGATCCGGCAGATTGAGCAGAGATTCCTTCGATATGGAGGATTACGGCATGGCCCATGGAACAATGACTTCAGGCTTTGTGTTGATGCTTCTGCAGTATGGTTGGCCGGCA…
12086	c_000000003034	678	1740	f	RimK-like ATP-grasp domain	PF08443	ATGAAACGAGAGACATACACGACCAGGCTGATAAAGACAAAACTGCGAAACACCAAACTTGGAATAATGTACCGGACCCGGCTGAGGCTCAAAAAAGGCAAGCTGTTTCCACTCACTAAAACAATTGATGACCTGTTTCCAGAGGTGCCTTATGTCAAGCTGAACAATGCTCCGGAACCGCTTCCCAAAATCGGTATTCATAAAGGTCCAACTGAATATCATGGATACGGCATCTTGGGATCATATTACCTCAGATACAAGCGTTTCCTGGATTTCAACGGTATTCCTCACAAGGTTCTGAATCTGCACCGCGAAGACTGGCTTGAGCAATGCGAGGATGTTGACATAGTTATCACATCTTTTGCTTCGGAACCATCCCGCCTAAGCGAGTTAATGGCG…
12087	c_000000003034	1835	2543	f	Glycosyltransferase Family 4	PF13439	ATGAAAGTGCTGTTCGTATCGGGTGGGAATTCCAGCAGCGGCATTAGCACTCTGGTCAGGGCTCAGGGCGACTCACTGACTAATTTGGGCCTGTCGATTGATTATTTTCCGATAGTTGGCAAAGGCTTAAAGGGTTATCTGGCAAACGTCAAACCCCTGCGGGAAAAGATTCGGTCTGAAAAATACGACCTGGTGCACGCGCATTTTTCATTCTGCGGATTTGTGGCGGCTCTTGCTGGCGCGCAGCCCTTGGTGGTATCCCTTATGGGTTGGAATGTCCGGAAACCACTATTGAAGCTGACGATCAAGTTTATCAACCGGATATTCTGGAGAGCTTGTATTGTAAAATCTGCCGAGATGCAGAACTTCCTTAGGATCAGGGATCTGATTCTGCTTCCC…
12088	c_000000003034	2778	3747	f			TTGAGTATATATAATTTCTATTCTGAAAAAATATCGTTGCCCATATCTGATCTGATTACGGGCAGGCAAATCGGGAGATATTTGAAGCTTTTGAGGCAAAGCCAGTTCTGGTCTGCGGAAAAACTTCGGGAATTCCAGAATGCCAGGCTGCGTAAGCTTATTGTTCATGTGTATTATAATGTCCCTTTTTACCGTGAGATCTTCGACAGATTGAACCTAACTCCTGAAGACATTCAAACTGTGGCAGACTTGAAGAAACTGCCAATTCTGGATAAAAGTGATATCCGCGAAGGGATACGCTCTAAAAGCTTGCTGGATAAGACTGCCAGAATACAAGATTTGGAAAAAAACAACTCCAGCGGTTCAACAGGTGAACCACTACAATTCTATCTGGATCGA…
12089	c_000000003034	3743	4118	f			ATGATTGAATTGGCGGAAGAAAAATGCCCATGTGGAAGGGATTTGTTGCACATAAAGAGTATTTATGGCAGAATTTCCGATATACTTGTTACTCCAAGCGGACAATTCTTGACTGTCAATAATTTTACTGGGTTGTTTCAGAACATAACCGCAATAGATCAATTCCAGATCATTCAGAAAAGCCGCAATGAATTCGAAGTGCTGTTGAAAGTGAACAATAGTTATAATCAGTCGACATACGACCAAGTTATGGCTATCATGAAAAACATCATCAAGGAAGATCTGATATTAAACATTGAGCTGACTGAGGACATTCCGCTGACCCCGTCCGGGAAACGCAGATTTTTGATTAGGGAAGCGTCCATATCCATCTGA
12090	c_000000003034	4217	4916	f	Aminoglycoside 3-N-acetyltransferase	PF02522	ATGAGTAAGATTTCCAGAACTGTGAACGCCATTAAATATGGTTTCAAAAGTAAACTGCTCGCTAAACATAGATTGTATCGTGATTATGCTTTTGATGAAGGCAATTTATCATTGATAAAGGATTTTGTCAGACAGCTTGATTGTGAGACAGTATTTGCTTTTGTGGGGCTTAGAGATGTTAAGCATAGCTTGGGATTATCAGATCCGGTTGACTATGTTCAGAATCTCTTACTGCATGAGTTCAAATCTGTAATTGTTCCTACCTTTACACCCTCTGTCAGGAAAACGGGTTTTTTTCATGTAAAACACACTTTAAGTGAGGTGGGGGCTTTTTCCAAGCATATATCCCAAATTGCCGATTATAGGACTCCTTCACCGTTAAAAAGCTACGCTGTTGTT…
12091	c_000000003034	5086	5794	f			TTGAGTGATGTATTACAAGTGGCACTGTCGCATGATATAGACAGAGTTCACAAAACATACCAGTATCTTACGCGTGCTTTCAGATCGTGTATGAGAATGAGGTTTGGCGCAGCTTTAAAAGAAATACTCTCAGTTAAGGAGAGTAGATCGGTTTATTGGAACTTTGAAGATATTATGGAAACAGAAGATAAACATGGTGTCCGGTCCACATTTTTTTTCTTGAATGAAAGCATAAGATTTCAGTTGCTTAGACCCTCCAATTGGAAACTCTCCTTGGGAAGGTATGATGTGAGTGATCCTAAGATCACAGATGTTATTCAACAATTGGACAAAAACGGTTGGGAAGTTGGGCTGCATGGTTCTTACCTTTCATATAATAACTATGATCTGTTGGTCAGG…
12092	c_000000003034	5786	5960	f			GTGCTTAATTGGCATGGAGATAATTGGGACGATCACGATTATCCAGAATATAAGAAGACATATATCGGACTGATAAATTTTCTGCAAGACCAAGGAGCGGTATTTAAAACTCTTGGTGATTTCTATCATGATTACAATGAAATTGATATGCCCATTATGACTATTAGGAAATGA
12093	c_000000003034	6051	6576	f			ATGGCAAAAGTCTCTACCACCCATACATACCAGGGAGTTGTAGTCATTGAAGGCCATGTTCAAGGATTGACAAACACGCGCATACTTGGTAAAGCCGGAATTCCTGTCATCGTTGTCGATGCGGGTAATTGTTTGGCCAAACATTCCCGTTACTGCAAGAAGTATTTCCAATGTCCGGATTATCAGACTGATGAGTTTGCCGATTTCTTGCTCAGACTACACAGGGATGAGGGACTGCAGGACTGGCTGCTGCTTCCTTCCAACGATCATGCTGTTTACACGATTTCAAAAAACAAGGACAGGCTGGCCAAGTGTTACAAAGTGATCACGGAAGATATTGAGGTGATCGAAAGTATCTACAACAAGAGGGAGTTGCTGCAACTGGCTTTGGGGGCAGGC…
12094	c_000000003034	6720	7221	f	Carbamoyl-phosphate synthase L chain, ATP binding domain	PF02786	ATGTCACACTGGGCTGGAGTAAAGCTCAGGTCGCACCCCATAAATTTTGGCACTGCCACCTGCTGCCAGAGTGTTTACGATGCAGAAATGCTGGAACTGAGCAAGCAACTCATAAGTGAATTAAACTATACCGGTGTTTGCGAGGTTGAGTGGTTGCGAGACCCACGCGACAATGAACCCAAACTGATCGAAATAAATGCCCGCACCTGGCTTTGGGTAGGGCTGGCGGCTAAATGTGGGGTGAACTATCCCCTGCAGATCTGGAATTACCTGGTCAAAGGGGAACTCCCAAAGGAAGTGAAGTATGCCACGGGAAAGATCTGGCTCAATCTCTATACCGATCTTTTCTATTCGCTCAAGTTGATACTAAAAAGATTGGTTAGCCCCAAAGAGATTCTT…
12095	c_000000003034	7296	8412	f	DegT/DnrJ/EryC1/StrS aminotransferase family	PF01041	TTGTCGATCATTTCAAGGAAATCACCCAAAAAGAGCATATCCTCATCACCTCATCCTGTCGCAGCGCGCTCTATTTGGCCTATAAAAGCCTTGGAAAAAACGGGGTGGTGCATGTTTCACCGCTCACCTGCCAGGTGGCCCTCATCCCCGATCACTGCAGCGGGCAATCGAATCTGTTTTCACGACGTTCAGGCTCATGACTGGACCCTGGACCCGGCCAGTGTGGCAGAGGGACTTCAGGATAGATCGATTGCCATCCAGGCCATCCATCTGGGTGGTTTCCCCTGCGACATGCCGGAGCTGAAAAGGATTGCCCTGGAGAACGGTCTGGTGTTGATCGAAGATTGCGCGCAAGGTTTTGGATCAAGTTATCAAGGCCGGCCGGTTGGCACAGTGGGA…
12096	c_000000003034	8452	9499	f	Protein of unknown function (DUF354)	PF04007	GTGCATCACTTCAAGCACATGTACTGGGAGCTTGAAAAAGAGGGTTGGACTGGCCTTTTTGTAACCAAGGACAAGGAGTGCGCGATTGAACTGCTCAAGGCCTATAACTTGCCATTTAAGGTGCTGGGGGTCAATAAAAAGGGTATTGCAAGGAAAATTCTCTCATTGCCCATGTTTTCCTTAAAGATGATCAACATAGCCCGCAGCTTCAAGCCGGATATCTTTGTCAGCAGAGTCTCTCCCTTGTCGGGCTATGCCAGCTTTATTATGCGTAAACCACACATCACTTTTACTGACACAGAGAATGTTAAGCTGCTCGATTCCATATCACAGCCTTTTGCAGATGTGGTTTGCACGTCTGATGTTTACCTCCGGGATCACGGGAAAAAACAAATCCGC…
12097	c_000000003034	10165	10708	f			ATGGGGATATCTGCTTCCTATTATTTCAGGATCGTTCCGCAGTCTTTCAATCCCAGAATCATTAAGGAGATTGCCTCTTTGGGGCATGAGATAGGTTACCACTATGAGGATATGGATCTTTGCTCCGGAGATGTGGACAAGGCTTACATATCTTTTCAAAAAAACCTGGCAAAGCTGCGCGAAATAGCGCCCATCCAGACCATCTGCATGCATGGCAGCCCCTTGTCAAAATACGACAACCGGGATCTTTGGAAAAAGTATGATTACCGCGAGCTTGGCATCGTCGGCGAACCCTATTTCGACATCGATTACAGCAAGGTGTTCTATCTCACCGATACCGGCCGCAAGTGGAACAGCATGGATGCCAGTATCCGGGACAAGGTCGCTTCGTCATTCCAT…
12109	c_000000003038	2	422	f	TrkA-C domain	PF02080	TATGCCAAAGTTGAAAACCAGTTGCACGGCAAAATTCTGGAGTTGATAGGGGTACAGCATGTCTTGCTGCCTGAAGAGATGGTGGGAAACCAACTTGCCAAGACGCTGATATCCAAAAACATACTGGATTATGTAAATCTGTCCAGCGGTCATATTGTGGTGGAAATGATCGCCCCGCCGGAGTTTGTGGGTAAAACCCTGCAGGAGCTGTCCCTGCCCATGAAACGGGGAATCAACGTAATTGCCATAAAATACAACTATCTGTCTGTTTCTGAAGATGGTAAGAACGTGATTGAAAAACGTCTCAACGACATACCGGGCGCCAATGATATCGTGAACGAAGGCGATGTTCTGATATTGCTTGGTCACAAAGGTAACATCGACAAGCTTATCTTTGAT…
12110	c_000000003038	423	1161	f			ATGAAACACTCACTAAAATCCAGATACCGTATCCTGATGATCTGCCTTTTGACATTGTTGTTGCTTGAATCCCTTTTGCTGCTGATCTCGCTCAACCGGGCTCACAGCCTGCCGTTGTTGGTCAAGGACCTGCAAACGATCATCATCGTGTTTGTGTTCATTCTCTTCATCTATATAGTCGTGATTTTTAACTACATCCCCTACAGGATGAAGAAATCATATCAGGATATTGCCGCTATCATTGAAGATATCTCGCACGGAAATTATGCCATTGAAATCAATGAAGAGAAGTTCGCGCACGATCCGGAACAGTTCAAACTGGTTCATTCCATTACCAGGATGCTCAATATAGTGCAACGCTTCGACGCTGCCAAGGCGGAAAAGATCTACGAACACCAC…
12111	c_000000003038	1150	2182	f	RNA pseudouridylate synthase	PF00849	ATGCAAAATAAATTAAGGGTTGTTGTCAACCAATCTGTGCCGGACAGGCTGGATAAGTATTTGGTTGGCTTGAGAATACAGGAGCTCTACAGCCGCACCTTCATCGAGAAATTGATTGATGAAGACCGCATCCTGGTTAATAAAATCCCCGTGAAGAAAAGCTATATCCTTTCCGAAGGAGATGAGATCGAGATATCGTTTCCGGATTTGCCGCCTCTTGAAGTGGTGCCTCAAAACATTCCGCTGGATGTTGTGTATGAAGATGATGATCTGGCCGTTTTGAACAAGGAAGCCGGCATGATTGTGCATCCTGGTTTTGGGAATGCCGATCAGACTCTGGTCAACGCCATGATCTACCGTTGGGGAGATGGTCTTTCCAGCGGCAGGGAAAAGAACAGA…
12112	c_000000003038	2183	3029	f	3,4-dihydroxy-2-butanone 4-phosphate synthase	PF00926	ATGACCAGTACAAAAGAAAAATACCAGTTTACCAGTATAGACGATGCCATTAAAATCATCGCCAGTGGCGGCATGCTTATTGTGGTTGATGATGAAAGCAGGGAAAACGAAGGAGACCTGTTGATGGCTGCCGACGCCATCACGCCCGCCTGCGTCAATTTCATGATCTCTCAGGGAAAGGGCCTGGTCTGCGCTCCAATGGAGTCCGATAACCTGAAGAGGTTGAATATCCCCCTCATGACAGAACGAAGCAGCGACAGGCATGGTACCAAGTTTACCATCTCGGTCGATGTGGTCGAGGGAACCACCACCGGTATTTCCGCCACGGAACGAGCCCGCACTCTGAAAGCGTTGGCCGATCCGCGAAGCAGGGCTGAGGACTTTATGCGTCCGGGACAT…
12337	c_000000003082	2	215	r			ATGTTTTACGACTTTGCCAATTCCGCTTTCACAACCGTGATCGTGAGTGTGGTCTATAACTCATATTTCCAGAAGGTTGTGGTAAACGGAGCGGAAGGTTATGCACAAAGGCTGTGGGGCCTGGCGGTGGGGCTTTCGATGACCCTGGTGGCGATCACGGCTCCATTTTTGGGGGCGGTGGCAGACTTTTCCCGCTCCAAGAAGAAGATGCTT
12338	c_000000003082	241	1177	r			ATGGGCAGGTCAATCAGATTTCACCGCGACGAGGAACTTTGCAAGGAAGACAAAGACCATTTCCGGGTAAAGGGCGATTTCTGCCAGGATGACGGATTGGAATTGAGCATTCAGCTTGCCTGGCAGGAGGGCAGGAAACTGGCAAAAATCAATGACATCCCTGTCCGTCAGTTGAGCAAACTCTATGAATGTGTGAAGATCATCTACTGCGCGCCGGACGACATGAATCTGGTGGGCGGAAGCCCCCGCTACCGCAGGCAGTTCTTCGACCTGGCAATATCGCAGATCTATCCCCCTTATATCTCGATACTGCGTAATTATATGCACATTGTCGAGCAACGCAACAACCTCTTGAAAAAAGACTATCAGCCGTTGGAAAAGAATAGCTGGGACCGGAAA…
12339	c_000000003082	1320	1794	r	DNA polymerase III beta subunit, C-terminal domain	PF02768	ATGAAGGTTCTGATGGATAGGAACAAAATTGTGTTCTCATATGGCAGCTTTACAGTGATATCAAATGTGATCGAACACAAGTATCCTGAATATCAGAAAGCTTTTATGAGCGACCTTCCCAACCAGTTGACGGTCAACACAGAGATTCTGCGAAGCGCCATCCGCCGCGTGTCACTGGTTGCCCCGGATGATAATTATCGAATCAGGTTTGAACTTGACAGCGATCATTTTGAGATCAGCACCAACAACAGTGACACGGGAGATGCCAAAGAAAGCATAGAAACCTTTGAATACAAGGGCAGCAGCACCTCCATCTCTTTCAATTTCCGCTATATGTTGTCAATTCTGGATGCCATCGATACCGAAAAGGTTTGCATCAAACTGGGTGGATCCAAGGAA…
12340	c_000000003082	1832	2492	r	DNA polymerase III beta subunit, N-terminal domain	PF00712	ATGAGACTAGCAATTGAAAAGAAGGAACTGATCAGATACATCCAGAACCTGACTGGTATCGTTTCTTCCAAAACCACCTCTCCGATCCTTACCAACTATCTGATCGAAGTAGATGCAAAAAAGAGCGAAGTCAAGATCACCGCGAGTGACTTGGAAATAACGGCTGATGTGCGCTTTAATGCCGCAGTGAGCGAAGGCGGAACAATTGCTGTCTCGGCAAAGAATTTCAACGATATCATCAGTAGTATGCCGGACGCCGTCATTGATCTCTGGAAAACAGAAGATCTGCTTATGATCCAATGCAACAAGATCGATTTCAATATACTTTGCGCTGATCACACACTCTTTCCCATCCTGCCGGAACCGGATATGGAAAAAGCAACCCTGGTGAATTCTGAA…
12530	c_000000003136	1	1132	f	MacB-like periplasmic core domain	PF12704	TGTATCATGGTGGTGCTGGCCATAGTCAACGGCATGAACAAGACCACCATGGAGTGGATGAGCCAGCGGGGAGGTCTGAGTAAGGTGGAGGTGAGGCCAAACTGGGGCTACGATTTCAGCAAGGGCGGCGATCCCAGCCTGTCTTTGCGGGAGATACGGCTCATCAGGGAACTGGTTCCCCAAGCCACCGCTTTCAACCCCCAGGTATCTTTGCCGGAAGCAGAGATGCAAGTGGGCGATTCAGGCTACGTATGCCCTGTTTTTGGTGTGTATCCGGATATGCTGAAGGTTGAGGAGTGGAAGATTGCCAAGGGGCGTTTTATCAACGAGTTCGACATAAGCAACCACAACAATGTGGTGGTGCTCGGTTCCACGGTGGCAAAGGAGCTGTTTAGTTCG…
12531	c_000000003136	1131	1884	f	Virulence factor BrkB	PF03631	ATGACCAAAAAGAAGGCTCAAGGCGGCTTGTGGAGTTCTCTGGGTCTCGCGTTTGGCAACTATTTCCGGACCCTGGTCTCGGAATTGAAGGAGCTTTGGCTGCATCTGAAAGACCCTGCCAAACGCAAGGATGGCTGGAAAAAAGTGAGCGGCTTTATACTTACTTTCTACCGCCGTTTCAGCAGCGAAAGCATCCTCAAGGAATCGGCGTCCCTCACCTATATCACCATCCTGGGTTTCATCCCCTTTCTGATGTTCATTCTCATCATCGCTCCGGAACTGCCCTTTCTCAACCTGAAAGATAAGTTTTACAACCTGGTGATGAACAACTTCATTCCCAGTTCGGCGAAGGCTGTCAACACCGTGTTTGAAGATCTGCTCGACCGCCCCGCGGGCTTC…
12532	c_000000003136	1880	2207	f	Virulence factor BrkB	PF03631	GTGATCTGGGTGCTGGCCAAGAGTCTCTTCGATTTCTACATCTACCGGCTCACGAACTTCCAGGCTGTCTATGGCGTCCTGGCGACTCTGCCTATCTTTCTGATGTGGATCTATGTGAACTGGGTGATCATCCTGGGAGGCATAGTGCTGGTTTCTGTGATTAACCACAGCGACCAGGAAGAAGCTCACGAGCGGCAACCCAAGCATTTGGTGAAGGTGACCCTGGAAATGTATAGCGATACCAAGCAAAACAACCGCTTGGAAAAGTTTTTGGGCAAGGAAGTCCTGATGGAGCTGGCCGATGTGCTGGATGAGGAGATGAAATGA
12533	c_000000003136	2203	2596	f	MGS-like domain	PF02142	ATGATACGCCACGCGCTGATTTCATTGAGCGACAAAAGCCGAAGCGAAGACCTCGCCAAAGAATTGGCAGAGCTTGGCTATCAGATACTCTCCACCTCCAGCACGGCGCGCCATCTGCGGGAGCAGGGGGTTGAAGTGCGTGAGGTTTCCGACCTCACCGGTTTTCCCGAAATTCTTAGTGGCCGGGTGAAGACCCTGCATCCGCGGATACATGCCGGAATCCTGGCAGACCGCTCCCGGAAGGAACACCTGCAAGCCCTGCGGAAACTTGGTATAGAACAAATTGACGTGGTGGCGGTGAATCTCTATCCTTTCCGGCAAACTCTGGAGAGGGGGGAACGCAACGCCCCCAAGAGATCATCGAAAACATCGACATTGGCGGCCCGGCCTTGA
12534	c_000000003136	2592	3639	f	AICARFT/IMPCHase bienzyme	PF01808	TTGATCAGGGCGGCTGCCAAAAACCACAGGGGCGTGCTGGTGCTTTCCGACCCGGAGGATTACCAGCCTACCCTCGAGCAACTGCGAGCCGGCGAAGTCAGCCAGGAATGGAGGACCCATCTGGCCCGCAAAGCTTTCCGCCTGGTGAGCGCTTACGACGCGCTGATCGCCTCCTATTTCGCAGGGTTGGCGGCAGAAACACAGAGCCTGCCCGGGAATTTCTCGCTCAACTGCAGGCTGGGTGCGCGGCTCCGCTATGGCGAAAACCCCCATCAACAGGGAGGGTTCTACCTGTCCGCGGCTTGCCCCTGGCAAGCGCTGCACGGCAAGGAACTTTCCTACAACAATCATCTGGACATCGATTCCACCCTCCGCGGCCTGCGCCTGTTCCAAGCGCCC…
12535	c_000000003136	4311	5130	f	Peptidase family S49	PF01343	ATGGTGAGATGCTGGACCAAAAAAGACTATCTGCTGTGCGCCATGGCGGACACCGTCTATATGGATCCCTCCGCTTCAGGCGGGCTGATTCTGGAGGGGATTACAGCCAGTGTGATGTTCTACAAGGAAGCCCTGCAAAAGATCGGGGTCAAAATGCACGTGATGCAATCCGGAGAATTCAAAGGCGCAGGCGAACTCTACAACCGCACCTCGCTCAGCCCGGGCACGGAAGCCAATATGCGCCGCGTGTTCAAAAACCGTTACGACCTGCTGAAAAACCATATCGCCAAGTTGCGCGGATTGGATTCGCTGCGGGTGACGGAAATCTTTGAGCAGCGTCCCGACATGATCATCAACGCTGCTTCCGCTCAGCAATACGGATTGATCGACGGCGTTACC…
12536	c_000000003136	5132	5651	f	Peptidase family S49	PF01343	ATGGCGATACCGGAAGCGGTTGAGCTGGGCAACAAACTGGGCATCGACAGCCAGACAATCAACTATGGCAAGTATTCCGGCGGCGTCAGCATTTTCGAGAAATACGACCCCGAAATGCTCGCCTCGCTGGAGCGCAACTCACAGAAGGTTTACACCGAATTCAAACAGCGGGTGATGACTGCCCGCAAGATCAGTTCCGAACAGATCGACGCCGTGGCGGAAGGCCGGGTCTTCAGCGCGCAGGATGCCAAAGACATCCACCTGATCGATGAAGTGGGCGGAATCCAGGCAGCCATCGACAAGGCCGCCAAAATGGCCAAGCTCACCAAATACGGCGTGAAAAAGTATCCTGCCAAGATCGGCTTTTTCGATCTGCTGAGACAGGGCAACCTCTTCAAG…
12537	c_000000003136	5859	7206	f	Ribonuclease E/G family	PF10150	ATGGGCGCGGCTTTCATCGAGATCGGCCTGGAGCGCACGGCCTTCCTCCACTATTCGGATATTGTAACCGATTTTCTGGACATCTTCGAAAACGACAGGCAACGCGTCCGCCTCAACCCCAAGGATTCATCGCAGATCGGCAATCTGCTCAAAGCCGGACAGGAGATCGTGGTGCAGGTTCATAAAGGACCGATCGGCTCAAAAGGAGCCCGCCTCACAGGCCAGATTTCCATCCCCGGCAAATACCTGGTGCTCTTTCCAAACAAGAGCAAGATCGCTATCTCCCGCAAGATCTACAACCAACACGAACGCTCCCGCATCCGCAACATCCTCAACAGCTTTAAAGACCCCAACATTGGCCTCATCGTTCGCACCGAAGCAGAAGGTTGCGACGAGGAC…
12562	c_000000003141	0	624	f			AAAAATCAGAACACTGTGATCCATATCGATTATCAGATTCCCTACAACGGTCTGGTGTTTCAGGCCTTCAAGGGAGGATATTTTGCCCAGGTGGAGATGAAGGTGGAAGTGATGGAGGCTGACAGCCTGGTCTTTGAACAGGTGATCACGGACAATATCGGGATCACCAACAAAGACGATATCAACTCGTCCAAATCCTATCTAAATCGGGTCAGCTACCAGATCGACCGTCCTCATTATCAGTTTAAGCTCAGCGCCACCGATGTGTTGTCGCAAAAGCAATTTTTCTGGGGCTTTAGCGCGGAACAATTGCATCCACAGGTCAACCTCAGCGATCTGGAACTCTGTTCTGAGGTGCGGCCGGACAGCAGTTCCTATCTGGAAAGATTCCATCGGGGA…
12563	c_000000003141	626	1226	f	ZinT (YodA) periplasmic lipocalin-like zinc-recruitment	PF09223	GTGGGCAAATATGTCGGTAGCCTCGATCTACAACTGGGTGAGAAGAATGAGCATCGCGAGTTTGAGTTCTTCGTCACCGAACCCAAAGCCAGTCTCTTTTATCTATTCACCAATCCGGATGACGATCTGCGTCTGCTGAGGTATTTTGTAGGCTACAGCGAACCCGCCCAATGGAAAAGTTACGACGAACAAACCAAGCGCAGGTTCGTCAGCCAGCTGTGGAAAGACTGGTCACAATCAGGCACGATGAGTACCCAGGCGGCGATTGATATAGTGCGGGAAAGGGTGGATTACAGCAACCAGTACTTTAGTTTTTTCGACCAGGGCTGGACCACGGACATGGGCAGGATCCATATCCGCAATGGGAAACCTGATGAGATCGAAAAGGGTACTTCATCT…
12564	c_000000003141	1305	1686	r	Uncharacterised protein family UPF0102	PF02021	ATGGAAAAACGTAAAACCGTTGAGCTTTTTCACATCGGCGAAGACCTCGCTGCCAAATACCTCGCAGCTCAGGGCTATAACATACTGTGTAAAAATTTCCGCAGTGATGCTGGTGAGATCGACATCATCGCTTCAGATAAGGACAATCTCGTCTTTGTCGAGGTTAAAACACGCTCCAGGCACTCTATGAAACTCGCGCTAATGAGTATCTCCTACACTAAGAGAAAACGGATATCACTCACCGCACAAAGATATATTACACAAAATCCAGATCATGTCAAGCAGAAAACACGATTTGACGTAATTGTGGTCTTCTATTACCCCGAAACCGACAGTTACAAGATTGAGCATCTACAGGATGCTTTTGTGCCAGTTTTTTGA
12565	c_000000003141	1770	2511	f			ATGAAGAAACTAATAATTTGCCTTTATGTTCTGGCAGCTATGTTTAGCATGGCGCATGCTGCGCCTTTTCAGACATTGGGAATGCTGCGTACGCCTGACGCATATGTGTTGCCCAACAAGTCAGCGGAATTGTTGCTGGTTGGGTATTACAGAGACTTTAAGGAAGGATATGCCAACGATAAATACAGCGGCATCACTCCTTATGGCATGATTGGAGTGGGGATTCTGGACAGGATCGAGCTGGGATTCTTTGGTGGAGACGATGTCTATTTCATGAATGCCAAGATCAAGGTTTTGCAGGAAACCCCCAAGATTCCACAGTTGGCTGTGGGTATGGACAACATTTTCTCCCCTGTGAATCATCGCAGGGCTCAGGACTACAAGCCTGGCCTGCCGCCG…
12566	c_000000003141	2531	2858	f			ATGGGGATATCCTATCTTTTCGACAAATACGCGGAATCCCAACGCAGGCCTGACCTGAGCCGCTATGCCAAAACCACAGACTTGCAGGGGACCGGGATCACTCCCGAGACCGAAGTGCCTGTGGGAGTTGGTTCCGAGGTCGCGATTGCAACCCCCGGCACCACGACGACACCTGAGATTGTAGGTTCAAGCGCGTACAAAGAACTTTCACCTGAAGTAAAAGATTTGCTTGCAGAGCTTAGAAGTCTGCGTGAAGAAAGGCAGAAAGCCCAAAAGGCCTTGGAAGACCTTCGCAAGTGGCTGCAGGAACTGCAAGAACAACAATAG
12567	c_000000003141	3135	6813	f	Tetratricopeptide repeat	PF13181	GTGCGGGATGCTGTCATTTTCCTCAAAGACCGTCTTCCTCAGTTGATTACAACAGACAAGGAGAAGGCGCTGGAAGAGTATATGACCCACGTGGAGAACCTAAACAAGCTTGAAGAGCTTGATGTTCTCTATCTGGTGGGACATTTCTACTCTGTATCGGACAACCCTCAAAAGGCTATTCCTTTCTTTGAGCTGCTGATCAATGACCCCAGATTGGGTGACAACGCAAGGCAGATGTTGAATCTGCTTTTATATTATCGGGCGGTGAATTATCTAAAGGGCGACAACCAAGCTGCCACAGTAGATTATATCGAGGATATACTCAATCTTTTCCCCACAGGCAAATATTACCCAACCTATCTGTATCTATGGGCGGACATTATATCTGAAAGCAGTAGG…
12568	c_000000003141	6916	8908	f			ATGTATCTGCAATTGCACGACTTGGTGAGAGCTAAGAAAGTGGACAATGGCTCAGTGGCACCTGAGCAGATCTACCTTTGGGCTTTGGACCTCTATCGTACCTCAAAAAATCAAGACAAGATCATCGAATTGCTCACATACTTTACCCGCACCTATCCCAACCATGAGCAGAATGCTGTTTTCCTGACCCTGCTGGCAGATGAGCATCTGGCAAGGGGAGATAACGATAAATTTGAGCAGTATTCCCGCGAGCTGTTCCTAAAGGATAAGACTCAGTATGACAGATATCTGACTACAGCCAACCGGAATCTAGGCAAGATAGCGATGGATTTCGATGCCGCTCATGCTGAGAAAGATTGGAACAAAGCTTTTGCCAAGCGGGATGAATTCCTGCAACTG…
12569	c_000000003141	8914	9217	f			ATGAGAAAGGTATTACTTACGACGGCGTTGTTGCTGATGGTAGCCGGCCTCCTGGCTCAGGTGGCGATAGATCCTCGCAGTGGTTTTGCCAATATCCGCGAGACTCGAGCTCCCCAGGAGATTGAGATTCAGATCAAGGCAATGATACCCGATATCAGCGTTGTTCAGATTAAAACTGATACTTACTCCGAACCGGGAGAATATAATTATACTATAGATCTTGGCGTGATCCAAGAAGAAAGCAAAAAACAACTAAATGAATGGCAACAAGAAATTAATAATTGGCTAGAGGAGTCAAAATGA
12570	c_000000003141	9195	9876	f	MotA/TolQ/ExbB proton channel family	PF01618	TTGGCTAGAGGAGTCAAAATGAAAGCTAAACACACCCTTCTCGTAGTATTAGCTCTTGCAATCAGCATTGGGTTCCTGCACGCAACCCCTCAAGTGGTGGGCGGGGACAAAGTGAATTTGGGGACCATCTTCCAGGACAGCGGGTTTTTCGGCTATCTGATCCTGTTGACCTTCCTGGTCGGCATAATCTATGCCATAATCCGCTGGGTACAACTCTATCAGAGAGAGAAGCTGGATGCCAGCAACTTATACCTGAAACTGAAAGGCTATATCAAAAACGACCAGATCGATGAAGCAATCAGGATCGCTGAAAGCTTTAAGAACACCACTCTCGGTTTCATCTTCTGGAGCGGACTGATGGGGTTCAAGGATGCCCGCAAGGTTCATAAAGGCGAGGAA…
12736	c_000000003184	1	76	r			ATGGTGGAAAGGAGCCCCCAAAACAGGGCGGTTCAGCGACCGCCTGTACTGTACCGGCGCTTGCATAGCGCAGTT
12737	c_000000003184	986	1256	f	Ribosomal protein S15	PF00312	ATGCCACTAACACCTGAGGCTAAAACAGCTATCATGGCAGAGTTTAAACTCCATGAATCAGACACTGGCTCGCCAGAAGTCCAGGTTGCTCTTCTCACACGCCGGATCAACGACATCACAGTGCATTTGAAAGAGCACAGCAAGGACTTCAGCACGCGGCGTGGCCTGTTGAAACTGATCGGGCAGCGTCGGCGCCTTCTTGATTATCTGAAGCGGAAAGACATTACCCGCTACCGCGAACTGATCAAGGCGCTCAATATCAGAAAGTAA
12738	c_000000003184	1449	1971	f	3' exoribonuclease family, domain 1	PF01138	ATGCACAATTTCAACATCATTAAAAGAGAAATAGAGTTTTGCGGACGCAAACTCTATGTGGAAACGGGCAGAATGGCCAAACAGGCCAACGGCAGCGTGTTCATCAGATACGGAGATACCTCAGTTCTGGTGACCGCCACCATGAGCAAGGAAGCAGCCGAGAATCAGGATTTCTTCCCCCTAACAGTTGACTACATCGAAAAGATGTATGCAAGCGGCAAGATTCCGGGTGGCTTCTTCAAACGGGAAGCCAAGCCCACCACCGACGCAACCCTGTCCGCCCGCGTGATAGACCGCAGCATCAGGCCGCTGTTTCCGGACGGGTTCAGAAACCAGGTGCACGTGGTGCTCAACGTCCTTTCCTTCGACGGGATAAACGATCCCTCCGCGCTGGGCGTA…
12739	c_000000003184	1967	3668	f	3' exoribonuclease family, domain 1	PF01138	ATGAAAAATCCAAAACTGAACCTTGCCGTTGCAGCCTCCGCCACCAGCGTGGTGATGATCGAATCTGCCGCCCAGGAACTGAGCGAAGAGACAATGCTCGATGCCGTGTATGCCGGGCATGAAGAGATCAAGAAACTCTGCGCCCTGCAAAACGACTTTGCCGCGGAAGCCGCCAAGCCCAAGGTCGAAGTGGTTCTGGTTGGCATCCCTGAAGAGATAATGGCCAAAGTGGAAGCCGATTATGGCAAGACTATCGCGGAAGCTGCCGTGATCCTTGGCAAACAGGAACGGCAGGATGCCTTTGACAACGCCGAAGCCGAGATGTTGGAAAAATATCTGGCTGAAAACGAAGAGACCTACGAAGAGAACGAGAAGTGGTATAAAGCCGCTTATGAAGAG…
12740	c_000000003184	3751	4717	f	S-adenosyl-L-homocysteine hydrolase	PF05221	ATGGATTACAAGATCGCCGACATCGGGCTGAAAGATTTTGGCCGCAAGGAGATCGAACTCGCCGAAGCGGAGATGCCCGGCCTGATCTCATTGCGCAACAAATACGCGAATAGCAAACCCCTGAAGGGCGCCCGGATCATGGGAAGCCTGCACATGACCATCCAGACCGCGGTGTTGATAGAAACGCTGAAACTGCTTGGGGCGGACGTCAGATGGGCAAGCTGCAACATATTTTCCACCCAGGATCACGCAGCCGCGGCCATCGCCGCATCCGGCACGCCAGTCTTTGCCTGGAAAGGCGAAACCATCGAGGAATACTGGTGGTGCACCTTGCAGGCGCTAAGTTGGCCAAATGGCAAAGGGCCGGACTTGATCGTTGACGATGGCGGCGACGCCACC…
12741	c_000000003184	4658	4817	f	S-adenosyl-L-homocysteine hydrolase, NAD binding domain	PF00670	TTGGATATTGCGGATATCTTTGTGACCGCCACTGGAAACTGCGACGTGATCAGGGTTGACCACATGCTCAAGATGAAAGACAACGCGATTGTCTGCAATATCGGCCATTTTGACAATGAGATCCAGGTCAACGCCTCTATTCGCTGGAAGGCGTGGTGA
12742	c_000000003184	4813	5158	f	S-adenosyl-L-homocysteine hydrolase	PF05221	GTGAAAGAGAACATCAAGCCCCAGGTGGACCGCATCAGAATGCCCAATGACAAATCCATCATTCTGCTTTCGGAAGGCCGTTTGGTGAACTTGGGCAACGCCACCGGGCATCCATCCTTTGTGATGAGCTGTTCTTTCACCAATCAGATTATGGCGCAGCTCGACCTGTGGAAAAACAAGCATCAGATCGGGGTGCATACGCTGCCCAAGATCCTCGATGAAGAAGTCGCTCGCCTGCATCTTGAGAAACTGGATGTCAAATTGACCATGCTCACCCGACATCAATCAGAGTATATCAACGTCCCCATCAAAGGCCCTTACAAGCCGGAATATTACCGCTATTAA
12743	c_000000003184	5164	5740	f	Transcription termination factor nusG	PF02357	ATGGCTACCAACGCGCCTGTATTGATTGACGAGCTGTTCGGCGAACTGATAGTTCCAAGCGGGGATGAGCGCTGGGCGGTGATTCACACCAAACCACGCTGCGAAAAGAAACTGGCCGATTACGCCATGCGGTCAGGCATCCATTATTATCTTCCCCAAATGGACAGCAAGAGGGTCTATAACAAGCGCACCGTATCGTTCACCAAACCAATGTTTCCCAGCTATCTGTTTTGTGTGCTCGATTTTGCCAAAAGACAGAAACTGATGATGACGGGCCTGACGGTCGGATTCATCAGAGTTCCAGTTCAGGAAGAGCTTCTGGAAGAGCTGGTCAACATCAGAATGCTGCGTCAACCCAAGGTGGAAATTAAAAACGCGCTTTGGCTGTCCAGGGGATTG…
12744	c_000000003184	5736	6219	f	NAD dependent epimerase/dehydratase family	PF01370	GTGAAGATACTGATCACCGGCGGAGCCGGATTCATCGGTTCACATGTGGCGGATGCCTGTCTGGAAGCCGGGCACGAGGTGCTTGTGGTCGATGACCTTTCCACCGGAAGCCTCGACAACCTCAATCCCAGAGCAAAGTTTTATCAGATCAGCATCTGTGATCCCTCCCTCAGCCAGGTTTTCGAGCGGGAACAGCCCGATATCGTAAATCATCACGCTGCCCAGATAAGCGTGCCCAGATCTATTGAGAATCCTCTCGCCGATGTGGAAACCAATGTGAAAGGAACGGTGAACCTGCTGGAGAACTGTGTAAAGTATAAGGTTAAGAAGGTAGTCTTTATCTCCTCTGGCGGAGCGATTTACGGAGAAGCGGAAGAATACCCGACTTCGGAAGCTATC…
12745	c_000000003184	6230	6677	f	GDP-mannose 4,6 dehydratase	PF16363	TTGCGCTACGCGAATGTCTATGGGCCGCGCCAGAACGCCTCCGGCGAAGCGGGAGTGGTCTCCATCTTTATCAATGCTCTTCTGGCAGGCAGGACGCCCACGATTTATGCCTATCCTGACGCTCCGGAGGGAATGATCCGCGATTACGTGTATGTGATGGATGTCGTGCGCGCCAATCTGTTGGCATTGGACAGGGGCGACAAGGAAATCTTCAATATCGGAACCTGCGTCGAAACCACCACATCACTTTTATACAAGACCATTCTGTGGCACATGGGCATGCAAAAGGAACCCCTGCGCGGGGAGGCCAGACAAGGTGATCTGCGCAGGTCAATGTTGGACTGTAGCAAGGCTTTCCAGGAACTGGGCTGGAGCCCGATCTTCACCCTGGAACAAGGA…
12746	c_000000003184	6673	6769	f	UDP-glucose/GDP-mannose dehydrogenase family, NAD binding domain	PF03721	ATGAATCTGGCCATGATAGGCAGCGGTTATGTAGGTTTGGTGAGTGGCACTTGTTTTGCCAATATGGGAAACCACGTCATTTGCGTGGACAACAAC
12767	c_000000003189	0	615	f			CCCCACCAGATAATGCTGTTGCTGGATTCTGTGTTCGACTCGCTCAAGGGGTTCCGCGCCACCCACCAGAGCATCGTGCTCGATTGCGTCCTCACGATTGGCAGGGCCGTGATCAGCACCCAGGATGGCGAGCTTATCCAGAGATGCGTGCGCAAGACCATTGACCTGGGCTTTGTCCCCCCCGGAAAGGTCGAGATCAACAAAGAGTGGCAGATATGCGCCGATAAAAACCACATCAAGAATATCCGGGTCTGGCTGGAACTAATCGGCATGGATATGCCCCGCACCGAGGAACTGCTCTCCGCCCTGATCATCAACCTGACGGTCAAAGGGGTGTTCATTTCCGATACCGACCTCTTCCAAAAAGACGTCAGCCAGTTCCTGAACTCCGATATCAAA…
12768	c_000000003189	598	3166	f	Pyruvate phosphate dikinase, PEP/pyruvate binding domain	PF01326	ATGTGGTTTTGGCATGACCTGGATCCCAGCCACCTGGATGGCATCATCCCCGCAGACGTGGCTTTCTATATCTCTCAACCCGACGGGCAGACCCAGGCGCAACACAGGTTCCTGCGGAGCTTTTTGGATAAAAAAGGACTGGATCCGGACAAGCTGCTGAACCTGTCCTGGCAACGGGTATCCAGGTTGTTCGGGGAATTTGGCGAAAATCCCGGATACGAGCAAAAGCGGCTGATCAACCTCTGCCACATATATTACCTGCTGCTGGACAAGTATAACCTCGATCCTTACGACATTGTAAAATTCCTCAAGCGTTATCCGTTCTTTGACCAGAAAGCCGAATACAAGCTGCAACAAGCCCTGCGCCGCGCCGATTACGAGAGCGCCATCCGCCAGATG…
12769	c_000000003189	3200	4454	f	Glyceraldehyde 3-phosphate dehydrogenase, C-terminal domain	PF02800	ATGAACCTCAATCTGCAAAACAAGAAACTGCTGGGAATCAACGGACTCGGCAGGATAGGTAAGCTGCTCTTGTGGAACCAGATCCACTTGCGCAACTTTGAAGGTATTATCGTCAACTGCGGCAGGGAAGTGGGAAAGACCATGGACGACCTGATTCAGGTGATCGAGACTGATTCTACCTATGGCAATCTGCACAAATTCCTGTTCGGATGCGTGGGCAGGAAAGCCGAGATCAAAATCCTGGATCCCACCCAACAACTTTTGGAAATAGAGGGCATCCCGGTGAAAATCTTACGCACCGCCCGCGATCCCAAGGATATCAACTGGCAGGCTGAGGGCGTGCGCATAGTGGCCGACTGCACTGGTAATTTTGTGGATCCGAACCTCATGCCCGATGGC…
12965	c_000000003253	2	641	f	Tetratricopeptide repeat	PF13174	CTGATCGAAAAGAAATCGGAAAAACCCAAGCTGGCTTTGCTGGACAACATCTATCATAATGGTATTATCACCGGCATTGGACCCGACAAGGACTTTAACAACATGGTGTGGGACAATCCCATAGGCTGGGTCAGTCCGGTATTCAAAACTTCCCGGGGAGATATCGTGTTCTTCAGGATTTTGAAGGAAACACCACCACTGGCGCAAAGCTTCACCGATATCGAACCCCGCATCTATGGCACCCTGAAAAGGGAACGCGAGGCAGCCCGCCAGGAAGAGGTTACGCAGCAACTGTTCACGGAATTCAATATGGTCAAATATCCGGAACGTGTCAAGCTGGAACTCTCCGCGGAAGAGCTCTTCAATCTGGCAGACAACGCGGCACGGCAACGTAACTTC…
12966	c_000000003253	1099	1663	f	Elongation factor P (EF-P) KOW-like domain	PF08207	ATGGCTTCGATGTCTGATATCAGAAACGGCATGATTATTGAATGGCGCGACGACCTCTATGAGGTGGTTGAGTTTTTGCATGTTAAACCCGGTAAAGGCCCCGCCTTTATGCGCACCAAGCTCAAGAACGTGCGTAGCGGCAGAGTGTTGGAAAACACCTTCCGCGAGAGCGACACTTTCAACGAAGTGCGTGTGGAACGCAGAAAGATGGAGTATCTCTATCACGATGGAGCCTTCTATATCTTGATGGACACCGAAACTTACGAGCAGACGCATGTGGATGCCGCCACAATCGGCGATAACGACAAGCTGATGCTTGAAAACATGGAAGTGACCGTGATGTTTGCCCCCGACGGCGAGATCATGGGTTTGGAACTGCCGGTTACAGTGGTGCAGACC…
12967	c_000000003253	1703	1913	f			ATGGGAAAAGTCAAATCTTTCACCGCCAAGGTGGCCCACGATACTTCTACCGAAGGTAAAGTGATATGCCCGGTGTGCAACACCGAAATAAAAAGGATCAAAGCGATACTCAACCGCAGAAAAGGCTCAGCCGGTTGGACTCCCAAATATGAGTTTGCGACGATCTGCAAGTGCAACGAAGCGGATTTCCTGGCAGGAAAGTCTTTATAG
12968	c_000000003253	2263	2725	f			TTGCTGCCCACCAGGAACTTACCCAACAACTTTCTGGTGCTCAGAGTGCAGTTTAGCGACCGCCAGTTTCAGCAAACGGCTGAGTATCCCGATTATCTTCCCCACGATTATAACTTCTTCGACCGCTGGATGGTGCATGTGAGCGACTTCTTCCTGGATGCCTCACACGGCAATTATCTGCTGCAATACCATCTCCATCCGGATGTCATCACCCTGCCCAAAACCATGGCTTACTACGGCGAGGACAGCCCGGACACCACCGACGTCAAACGGGGGGAGTTTGCCCAAACCCTAATCCAGATGGTGGATCCGGTGGTGGACTTCAGCCAGTATGGCGGGATCATTGTCTTTCACGCGGGGCCGGGGCAGGAGTCGGATCTGAATAAATCCCGCACTGAA…
12969	c_000000003253	2771	2960	f			ATGGGCATCGCTCCGGAGAGTGAATTTCAGGATTACTTCCCCGGCGAAGGCGAAGATAACGCCCCCAACTATCTTTTCAGCATGTATGGCGTGCTCGCCCAGCAGGTGGGGCACATGCTGGGGCTGCAACCCTCTATGACAACTACTCCGGCAACGGCGCATCGCAAGGCGTGGGCAACTGGGATCTGA
12970	c_000000003253	2959	4357	f			ATGGGCACAGGCGTGTGGAACGCCAGCGGTTATGTGCCAGCCCAGATCGGCGCCTGGGGCAGAACCCACTTGGGCTGGGAAAATCCTATTACGGTCACGGAAGACGCCGCCGACCTGCAGATCGACTACTTTCTGAATCACTCGCCTATGGCTAACCGGGTCTATAAGGTACCCATATCCGCCACTGAATATTTTTTGCTGGAAAACCGTCAGCAAAACCCCGACGGCAGCGTCGATCCCATCACCAATCAGCCCAGCTATTCCTTCACCCTGCTGCCCCACGGGGAACAGGACTACTATCCAGACAATCCCAATACTCCGGAAGACGAATCGCTGATCCCCTTCTTCAATTTCATGAAAAACCGATATCGCGACAGCGAGTGGGATTTTATGCTGCCC…
13023	c_000000003269	81	630	r			GTGACCTGGCTTTCCAACAAGTCATCCAGCGGTTACAGCGCCATCTACAACAGCAACTACTTCCTGGGTGAGCAGATCGATCTGCGCCTCAGGGCGGAGGACAGCATCCGCTCCCTGCGCCTGGACCTGAATCCCGAACTGAGGATTCTGGACGCGGATGGCAAGGAGATGTTCAAGGATTTTATGACCCTCTCCGATGGCGAATATGCCAGCTCGCTGACCTTGGACAAACCCGGCCAGTACAGTTTTGAGATCAGGGACAAGGTGAGCGGGGAGACCAGCAAGGGCAGGTTCAACGTGAGCAACGCCTCTCTGGAAGACCGCGATTTCGACTATAACCTCCCGCTTTTGGCCTGGCTGGCCAGCGACACCCGCGGGGAGTTGCTCTCGCCCGCTTCC…
13024	c_000000003269	626	1397	r			TTGCAACTCAAGGAAGGGGAGATCGCCAGCGTGGATTTCAACCAGCGCTTCAACCAGACCGGCTTCTATCCTTACACTCTGAAAGTCTCCGCCGCCGGGGTGGCGGAGCGGTCGCAAAACAACAACAGCTATCCCGGCGCCATCGAAGTGCTGAGCGACAAACAGCGCGTGCTTGTGCTTTCGGACAGCCCCGCCTGGGACAACAAGTTCATTGTGGACGCCCTGGCTGAAAATGAACGCTGGGAGGTGGCCCATTACCGCGTGCGGGATGGAAAAGTTTACGCGGGTGAAAAAGCCGTTGCCAGCCTTCCGGATGCCAACCTTGCCGCCTTGGTGATCGTCAACAACGGCAGTCTGCGCCTCTCCGGCGAGCCTTTGAACTTTATAAACCGCAACCAT…
13025	c_000000003269	1401	2082	r			TTGAAATACATCGTCATTGCCCTGATCTCCCTGGCGATCTCGGGCTTTTTCTACTTTCGCACCCAGCCGGCGCTTTCCCGGGGGAGGCGCTGGCTGCTTTTCTCCCTGCGCGCGCTCAGCCTTTACATTCTTTTACTGCTGCTGATCAGCCCCATTCTCTACTTTATGCGGCAGAACGTCCAAAAACAGCAGATCATCCTGCTGCGGGACGTTTCCGCCAGCCTGGACCTGAAAAGCGGCAAACAGAGCAAGAAGGACTTCCTCAAACCCCTGGGAGAGCAGGCCGCGAAAAAAAAGTTCGAGCAGGCTGGATATGAGTTGCTCAGCTACGACTTTGCCCGCGGGCTGGAAGCAGCGTCCGACAACACCCTGTTGATGCCCGCTTTGGCCGAATTGACC…
13026	c_000000003269	2172	2880	r			GTGTTCAGCAAAAAGCAAAACAACGCCTCCGCCCTTTCCTATGTGGATATCACCTATGGCATGGGCGATATCCGCATCCCGCTGGGCAAAAAGCTCAACCCCATCCAGACCGGATTCGCCCTTAGCATCCTGACCGGAGTTGGCAGCGGGCACACCGAAAACTACGAAGGCAGATTCAGTTCCACATACGACGGGCTCAGCCTCAAGCAGGACATCCTGCTGCGCGCCGGTTTAGGCGGTTTTGGCCTTAAAGGCACGCTGGGCGCTGCTTGGCAGACCCCTTTGCCGGGCCTGTCCACCGGCTTCGCTTTGGACAACATTCTGGGATTCATCAACTGGCAGGCCAGGTGCATGGACTTCAGCTACCGGCTTGAAGCGGACAGCGTGTATGTGGAAAAT…
13027	c_000000003269	2903	3203	r			TGGAATCCCGCCCTGCTCAACAGATCATACAACGATGTCCTGTTCCCGGTTCTAAACCTGGGGATCTATATTGCCAACAACTCCCTGGATCTCGATCTCTACAATTCCGTTGTGGAAAAGGACTTTCTCACGGAGGAGGACAAGGACGAGATCCTGGACGCGATAGATGAAAAACTGGGCGTCTATGCCGGCAGCCAGATCGTCCTTTCGGCTTCAGCAAAGGCCGTTCCGCCGTCACCAGTTCGCTGCACCTGGATGCCCAAGGAAACCTTTCCGAGCAGTATCTGGAGCTGCTGCTGA
13049	c_000000003277	0	663	r	Beta-eliminating lyase	PF01212	ATGTATCCCATAAGTTTTGGCAGCGACAATCATTCCGGAATCCATTACAAGGTCTTTTCCTCATTGCAGCAGGCAAATGTGGGCTTTTGCCCCGCCTATGGCGACGATGCTCTGACAGAGCGTATTTTGAGCGAGATCGAAGCCCTCTTCGGAGGTGACTGCACGGCTTGGTTCGTGATCACCGGCACAGGGGCCAACGTCGTCTCCCTGCAAAACTTCCTGCGTTCCTACCACGCGGTTTTCTGCGCCAACAGCTCCCACATCAACGTGGATGAGTGCGGCGCGGTGCAGAAATTCACCCAGGCACGCCTCAAGGTGATCGACACTCCGGATGGAAAACTGACTCCCGAACTGATCGAGCCTAAACTGCTAACCAACCGCGACCAGCATCACTCGCAG…
13050	c_000000003277	716	1184	r			GTGCGGGAACGCTTTTGGGGCAATAAGCTGGATCTCTTCGCCCTGGCCTATGATTATCCCGCGGAAGAGCGTGAATGGCCGATGTACTATCTCAGCTCCTGGTTTGCCACGGATTATATGCGCAACAAGGATGAAGCCGCCTGGCGCAGGTTTTGGGGCATCGCGTCCGCCCATGCCAGATTGGGGCACAAGACCCGCTTCGTGAGCGCTTTCAGCCAGGCATACAACAGCAGCCTCTACGAGTTTAACCTTGATTTCGCCGCCTACAGCAGGAGGCAAGCCTGGATCTATCTGATCATAGGAGCCAACTCAATAATCTTTGCCATCTTGCCTGTGGTGTTGATCTTTGCCTGGCGCAAGCGCCGTAAAAAGCTGTTGTCCATGCCGGAACTGGAGCTG…
13051	c_000000003277	1295	1658	r			GTGCGCAGCCTGCTGCTCCTGTTTCTGTTCCTGGTGAGCGGCCTGGCGGCAGAATACCGGGTGGCCGCTGTGACGGAAAACCTGGTGGTCTATTCCGCGGACGGCGAGTTTGGCAGCAAAGGCGCCTTCCTGCAAGGGGTGGACAAACGCATCGACGCCCTGCAGAGGGACACCGGAATCTATCTGGAGCAAAAAGGCGGATGTCTATATCGTGCCAGACCGCGCCAGTTACAGGCAACTGGCCTCCGGCAAGGCTGCCATCGTGGAGTTTTCGGATGCCTTTTACAGCTCCGCGGAACGCCGCATCTACCTGCGCAGTTCAGACCAGATCTGGGAAAACTACTCCGATATCTTCCTCCATGA
13052	c_000000003277	1673	1928	r	S4 domain	PF01479	ATGCGCATCGACCTGCTGCTCAGCAAGCTTTGCCTCACCAAGACCCGCAGCATAGCCAAAACCGCCTGCGACAAAGGTTTGGTGGCCATCAACGGCAAGAAAGCCAAGGCATCCGCCGAGGTGAAGGAAGGCGACATGGTCAGCCTCTCCCTCTATGGATTCCAGCACGAAATCCGCCTCGATAAAATACCTGCCGGCACGTCGCCAAGAAAGACGCCACCAGTTTCTATACCCTGCTCAGCAAAACTCCGCTGA
13053	c_000000003277	1947	2871	r	Acetokinase family	PF00871	GTGCACGCCGGGGAGCATTATTCGGATGCGGTGGTGGTCACCGACCACGTGGTGGAAGTGATGCGCGAGTGCGTCCCGCTGGCGCCGCTGCATAATCCCGCCAACATGAAAGGCATCGAAGCGGTGAAAGCCAATATGCCGGATCTGCCCCAATGCGGCGTGTTCGACACCGCCTTCCATCAGACCATGCCGCCCCAGGCCTACCTCTACCCCCTGCCCTTGGAGATGTATCGCACCCACAAGATCCGCCGTTACGGCTTCCACGGCACCTCCCACAAGTATGTCAGCCAGCGCGCGGCGGAGTTTTTGCAGCGCGATCTGGCGGAACTCAAGGTCATCAGTTGCCACATGGGCAACGGCGCTTCCATCACCGCCATCGCGGGAGGCAAGTCCGTGGAC…
13054	c_000000003277	2810	3146	r	Acetokinase family	PF00871	ATGAAGATTTTAGTGCTAAACTGCGGAAGCTCATCGATAAAATTCCAGTTCATCAACATGGACACCCGCCAAGTGTTGGCGGAGGGAATCGCCGAACGGATCGGCGAGGACATCGCACTCTTCACCTACAAGAGTGAGAAATTCACCCGGAAAAAGAGCGAGATGGCGATCGAGAACCACGAGCAGGGCTTGCAGTTGATAATAGATTCACTTTTGGACGAGACAAACGGCGTGATCCGCGACAAGAGCGAGATAGACGCGTGGGACACCGCCTGGTGCACGCCGGGGAGCATTATTCGGATGCGGTGGTGGTCACCGACCACGTGGTGGAAGTGA
13055	c_000000003278	2	1286	f	Exonuclease	PF00929	AAAGGGTTCCGCAACAACCTGGATTTTTGCGCCATCGACATCGAAAGCACAGGGCTTAAACCGGAACAGGCTGAGATCATTGAATTAGCAGCAATCCGTTTCCGCAGCGGCGAGGAAGTGGCATGCTTCAACACCTTTGTGAAGCCAAGACGGAACTTGCCAAAGTTCATAGAATATCTCACAAATATTTCACCCCAGGACTTGAAAGAAGCTCCACCGCCAAAGGAAGCTCTGAAGGACTTTATGGACTTTGTGGGAGAGGATATTCTGGTGGGGCACAACGTGGGCTTTGACCTGAGCTTTATCAACCACCATTGGGCTTTGCATGGTGGCATCGCTCTGGCTAACCGGAGCTGGGACACTGCCGAAATCTCGCGGGTATGGCTGCCCTACACCTCC…
13056	c_000000003278	1285	2863	f	Helicase C-terminal domain	PF13307	ATGAACCTGCGCAAGCATATCGAGACATCAAGTATCGTAGTGGCCAATCATTCACTACTCCTGGCAGACCTGCGCATGGAAAACAGCACCTTGGGCGAGTATCAGTATCTGGTGATAGACGAGGCACACAATCTGACCTCCACCGCGGTGCGTCTTTTAGGCTTTGAATTCAGCTTCGCTGATGTGAATAATCTGATTAACCAGATATCCTCAGCGCAAAAACGGCGCGGCGTAGGCCTGATGTCACAGCTGGAGGGTGCCCTTGGCAAAAGCCTTGTTCCCCAGGCGGGCAAGGAACATCTGGAAGCTCTGATCCGAAATATAAGCGAACAAAGCAACAGCTTGCGCAAGACTGTCACGGCAGTCTTTACTGAAGCAGCTATGCGCTGTTCGGCCTCA…
13057	c_000000003278	2840	3620	f	FAD binding domain	PF01565	ATGATGAGAAAACTGATAACTAATAGATTTGCTGACTTGGTGGACAGTCAGGTCATCCGCTTTGACGAACCGCTGAAAGAGCACAGCAGCTTCAAGATTGGAGGTCCGGCTGAAGTTTTTTGCCAGCCCCAAAGTTACTCCCAATTGATTGAACTGCTTGCTTTCGCGCTGGAACATGCCCTACCCTACTTTATTCTGGGCAAGGGCTCCAATCTGCTCATCAGCGACGCCGGACTTGACTCTCTTGTGATCCACACGGGCAGACTTGACAGCATCGAAAACGATGAAAAGTACATCAGTGCAAGGTGTGGAGCAAGTTTGAAAGACCTCTGCATCAAAGCCATGGAGCTTGGTCTGTCTGGATTGGAATTTGCCTCCGGGATTCCCGGATCGGTGGGC…
13295	c_000000003339	2	491	r			ATGCAGGAGTACGCGGCTGCTTCCCTTACCAACGGAGTTTCCACCCTGGCCCTGTACGGTACTGTCTTACATATGGACGACATGGACATCACCGATGAAGACACCTTTGGCCCCACCGGAGAACAATTCACAAACAGCGGCATGGCCTTTGGAGCTGCCTACGCGCAGCAGTTCACCAAAAAATTCAGTGCTGGAGTGGGCGCAAAGTATCTGCGCGAAAACCTCTACGAATTCGCGGTGAACAGCTTCTCTTTCGATGTCGGCTCAATGTACAATACCGGCTGGAAGAATGTAAAGATCGGCATGGTGCTTCGCAACTTCGGTCCAGATGTCCGCTATCGTGTGGATGACGACGAAGACGGCAGAATAGATGAAGACCCCTTCGACCTCATCGACAAC…
13296	c_000000003339	763	1633	r			TTGGATGAAAACTACTATTATTACATCAACACCCATCCGGATCACCCGGTCCATGATTTCAAGGTCTTCTACGGATTCCCTCTGTATAAACCTGGCGTGGACCATGCTTCGGCGCTTTCCGAGGCTAACCGCATTGCCACGGAATATGCCGAGTTGCCAGATGCGATAATCAAGAAGCTTCAAGCGCGCATCTTCAAGAATCCGGATGTCAGAGACGATGTTTACGATGAACTGGCAGATTACCGGCTGATCCCGTTGCCCGGTTTTGGCGGTGGAATTGCTGATACTCCGGATGAGCTGGTGGAACTGGAAAACAAACGCCTGTCCAGACGCTATTACAAGCAGACCATCCAAAGCCCGCGCAAAGGTATTGAATACTACGTGGCGGTCACCGCATTT…
13297	c_000000003339	1625	2792	r			GTGGCCCCCAGACCATGGGACCGGAAAAAAGCCGCGGATGACAAATCCGGATACGTCAAAGGTGAAGGCTATGAATTCGCTTATACCTACGACGCGGATGGCGACGGCGGCCTGACCACCGGCATGGTGGGTGCGCGCGTTTGCACACCCGATCCCGAGGATCTTGAATTCGCCTGCTGGTACTGGAAAGTGGGAGACGGGCCAAACGACGATAATCCGCTGTCCTTCAACTACGCCCCCAGGTTGACCGCGAACGAGAAATACTGGCTGCTTACGGGAAGGAATCCTGATTCTTCCAAGTATGCCTCCCTGCGTCCGGAAGAGCCCACGGTAATGGAATATGAGCAAGTGGAAGCCAACGACACCCGCTTCCTGTTCGCGTTCTACGGTGATATGCAT…
13298	c_000000003339	2751	2913	r			ATGAGCTACCAATGGAGCTATGAATACATCAAGAACCTCGTTTATGTGGAATTCAACATCACCAACATGAACACGGACACGCTGTACGACTGCGCCATGGGCATATATATGGACTGCGACTGTGGCCCCCAGACCATGGGACCGGAAAAAAGCCGCGGATGA
13299	c_000000003339	2909	3878	r			ATGAAGTTCTATAAAATTGTGTTTTGCCTGTTGCTGGCAATGGCTTCCTTCGGTATCGCCCATGCGGCCATGGCCAGTCCCTCAACAGGAACAAAAACCTTGGATCTTTCCAAGTGGCACAACGTTGGAAATATCTGGCTGCGCGTAAGTAACTACGGTTTCTTCGGCTCCGGCGATGACGTGGTGCCCCAGTACCCATCCCTGGAGTATCCCGGCGGAAGCGGTATTGACTACCTCTACCAAGCCGCTCTCTGGTTTGGTGCCAAAAAGTATCGCCGCAACGATCTGGGACAGCAGCTCTACTGGAGAGCGCTCAACCCCAGCGCGGACAGCACCGGAACGGTTCCCTACGGTTCGCCGGACTGGCGGCCCTGGATGAAGCCGGTGATCGACACCCTG…
13300	c_000000003339	3895	4549	r	Gram-negative bacterial TonB protein C-terminal	PF03544	ATGACTACAAATAGATTGATTGACTGGAAAGACATAGCCAATTCGCAGTTCAGCAAAGCTGTCGCCCTGGCTGCCGCGATTGTCTTGTTTGGCTTGCTGGTTGCCCCTAAGATGGAGACCAGCGTAAAGGAAACTCAGACAGTGGCCGCTGAAATGATCGACGCTCCCACCGACACGCGTGAGAAAGAAGAAGCGCCCAAGGAAAGCGAGATCAATATCGAAATCCCCATGATCAGCGAAGAACTGGCAACAGAAGACACACCTGAACTGAAGCAGCAAAGAGCCCTCGCGTTGCAGCAATTTGGCGACCTGCAGCAGACCACGACCTCTGTCTTACAGAGCACAGACAGTGAAAAACCCTTCGATTTCGTCCCCTGGGATGATTCCCCGGTTCCCATT…
13301	c_000000003339	4558	4978	r	Biopolymer transport protein ExbD/TolR	PF02472	ATGGCAAAGATAAAAAAGAAACAACGCGATCCTGTTGAAATCCCGACGACTTCCACAGGCGACATCTCTTTCCTGCTTTTGCTTTTCTTCATGGTTACCACTGTCTTCGTGCAGGAAAGGGTCTTCTGGGTACCCAGAGATCAATTCCCCACCGCCAAGAACATTGACAGGGTATCACGCAACGAGACAGCCACGATCTATATCACCGAAAAGGAAGAAATACTGATCGATGATTTCCCGCGCAGCGTGGAAGACAATTCGATCATAGACGCGATGCTGGCCAAAAGCAGTGAAATCCCAAATCTGCAGGTGTGCTTCCGTTCAGATAAAGACACCCGCTATCAGATTATCCGGGACGTTATGATGCGCCTCCAGGATGCGGACACCAGAAATGTTGTC…
13302	c_000000003339	4987	5464	r	Biopolymer transport protein ExbD/TolR	PF02472	GTGAAGATCCCCCGCAAAAGGAAAGCCACTGCTGATATTCCCACTACTTCCACTGGGGATATTTCCTTCCTGTTGATCGTCTTTTTTATGTCCACAACCAAGTTCGACGTTAAAGAAGGCGTGAAGGTCATGCTCAATAAAGCGACTCAGGCCGAGAAAATGACTGCCAAGCCAGAGATCAAGCTCACAGAAAGGGAAATGACCAGAATAGAAATAGTGGAAAACGGCATGATCAAGATCAATACAGAAGAACCCCGCTATCTTTCAGATGCCGACCTGGACCAGATTATCATGCAAAAGGTGGAGATGAGGGAAGCGATCAGCCGAAGCAGCACCAGCCAGGCAGAACGGGAATTGAAGATGTTGTTTCTGGTGAAAACTCATCCGGAAGCAAAATAC…
13303	c_000000003339	5477	6179	r	MotA/TolQ/ExbB proton channel family	PF01618	ATGGCAGAAGTTGCGGAACCTGTCGCAGAAGTTGAGCAGCAAACTGTGGAAACTTCTTCCGGCGCCAAAGGAATAGCTGAATTTCTTTTCGGGCGTGGTCTTGTAACCTTCTTCATCAACGGCGGATGGGTGATGTGGCCTATCCTAATTGTTGCCATCTACGGTCTTGCCTACGTTATTTGGAAGTTTATAACCCTTATGTATGCCAAGATCAATCTGAACGGGTTCCTGAACCAGATTGTCCCCCTGATCAAAGAAAAGAAGTATAAAGAAGCGATTGAATTCGCCAAGAAGACCCGCGGTCCTGTTGCCTCCATCGTATATGAAGGTTTGCTGAAGTCTGAACGTGGCGTGGACGCCGTGGAAAAATCCATGGAAAACGCCGCCATGATCGAGATG…
13304	c_000000003339	6313	7618	r			ATGCCCGACGGTGTGTTTAGCTTTGAGTATAACGAAGATCAGAAAAAGTATCTTGCCATTTATAATCCTGAAGTATATTTCAGGGCTGCCAAAGAAGCCTCGGGCAAACGTGATGGATATGAAGCCGAACCCATGCAGATCGCGTATTACCTCCAGGATAAAATGGAGTGGGAAGGCATGATCGTCAACGCTGGCTTGCGCTTCGACATCTGGTATCTGGGCTCCAGCTACAAAGTGTTGAAGGATAGCGGCAAATACGAATCGGTGCCCTTTGAAAAAGATGATCGCTGGCAACTCATGATATCGCCCCGACTTGGCGTGTCCCACCCCATCACCGAACGTGACGTGTTACGTTTTGCTTACAACTATCAGAACCAGCTGCCACAAATGCAGTTTATC…
13426	c_000000003372	1	1519	r	Glutamine amidotransferase domain	PF13537	ATGCTGAACCTGAAAGAAATCTGCTTCAGACTTTTGCACAGAATTGCCCGCAGCGACTTCCGTCTGCGCCTTACCCTGCCCTTGCCCGGATTGGGCTGCGGCGTATTGGGACTTGCCTTGCCCAAGGTTTCCGTAAACATCGGAGAATACGCTTCTAAACTACTCAAAGCTTTGGAATACAGGGGTTACGACTCCACCGGCGCCGCCTTTCAAGGTGACAGCCAGGAGATAACCCTGCTCAAGGATGTTGGAGCTCCCAGCACCCTGGTGAAGACTCTGGGCATCGAAAAGCAGGCTGGAAAACTCTTTTGCGGCCAAGTCCGCTGGGCCACTTTTGGCTTTGTAAACAAGGTCAACGCCCAACCCCACGAGGTGAAATGCAAACGCCACCTTTATGGC…
13427	c_000000003372	1537	2230	r	2-C-methyl-D-erythritol 4-phosphate cytidylyltransferase	PF01128	ATGGAAGCGCTGAGTACTGCCATTGTAACCGCCGCCGGTTCCGGCACCCGCATGGGTTCCGAGATCAAGAAACAGTATCTGCCCCTGGGCGGAATACCCATTATGATCCGCACTTTGCAGACCTTCTTCGCATCGGAAGTGATAGACAGCATCATTGTCACCGCCCCGGAGGATGACGTCTCGTACTGCGAAGATATGATCAGGCAGTATTTTGATGATTCAGACAAGCCCTGGCTGGTGATAGCCGGAGGAGCGGAGCGTCAGGATAGCGTCTTTGCGGCGCTGCAGCAATGCCCTCCCTCTGTCAAATATGTGTTCATCCATGACGCCGTAAGGCCCTTTATCAGTGAAGAACTGCTGTTGGAACTGTATGAGATAGTGCAGCGGGATAAGGCTGTT…
13428	c_000000003372	2217	3165	r	Radical SAM superfamily	PF04055	ATGAATTACAAGCATCTTTTTGGACCGGTGTTGTCCCGCAGGCTGGGGCATTCCCTCGGCGTGGACGTTGTTCCCTATAAGTATTGCCCGCTAAACTGTGTCTATTGCGAGGTGCAGAGGACCACTCAACTCACTCTGCAGAGGGAAGAGTTTTTCCCGCTTGAGGAGATAATCTCCGAACTGGACGAGTTTCTGAAAGGGCGCCCCCCGCTGGATTATATTACTTTTTCCGGGGCTGGCGAGCCCACGCTTTACAGCCGGATTGGAGAACTGATCGCTTACATCAAGGACAGATATCCACAGTACAAGCTCGCGCTGCTCACCAACGGAATGTTGCTGGATAGGGAGGATTTGCGAAGGGATATATTGCCCTGCGACCTGATCCTGCCCTCGTTGGAT…
13429	c_000000003372	3168	5406	r	Surface antigen	PF01103	ATGTATGCCGTGCTATGCCTGATGCTGCTTTTCAGCATTGGCAGCCTGTTCGCGGCAGGCGAAACCATATATGAGATACGCGTGGAAGGGGCCAAGACCGTGGCCGATGAGCTGATCACATCCACGATCAGCCTGCGCACGGGCGGAATCCTCGACCCGGCTGAGGTGGCGAAGTCCATCAAACAGCTTTATAAAATGAGCATCTTTTCTGATATCCGGGTGCTGACCGAGCCTTACAAGACCGGCGTGAACCTGATCATCAGGGTGCAGGAAAACCCTGTCCTGGCCTCGATCGAGTATCCGGGTATGAAGGTGGTCAAAAAAAGACCGCCTGGACGAGCTGATGACCGTCCGGGTGGGCACTTCTGGTCGGAAAACCAAAAACAGCAACTGGTCTCC…
13430	c_000000003372	5548	6430	f			ATGCTTTCCAGATATTATGGAGGAACGATGCAACGCCATGCCATAGCAACAGTGATTATCATGCTCGCGGTGCTGTTCAGCGCCGCCCACGCCGTGGAGAGGATTCCGGGGCTTTCCCGCAAGCCCCATTTCCCGCCTGCCCTGACACAGGATAGCAAAGCCGATTCCCTCACCGGATTCGACGTGCTGGAATATGAGATTACTCTGTCCATCAATCAAGCCACCCGTCAGTTAAACGGCAACGTAGCGGCCACCGTGCTGGCCGAATCCCATCTCACCTCACTACCCTACAACCTGGTCGGGCTGAACGTCCTGGAAGTGCTGGTCAACGATGTTCCCGCCACTTACACCCACACAAACGGGATAATCGACATCAGCCTCGACATCCCCGCCGGACAG…
13431	c_000000003372	6432	7425	f	Peptidase family M1 domain	PF01433	ATGAGCACCTACGGCGCCATGGAGCATCAGACCATGACCACCCTGGGCAACTATATCATCACCGGAACCGGCGCCCATGAACTCGTCATCGCCCACGAACTTGCGCATCAGTGGTATGGCAACGCGGTTTCCTTCCTCACTTTCAAGGATGTGTGGCTTTCCGAGGGCTTTGCCACCTATTCAGAGCATTTGTGGACGGACAAAGTCTCCGGATGGCAGAGCGCGGTGGATTACGTGGCCAGCTCCTATCACCAATACTACATCAATTGGGAAGGTTCCAACCCGCGCACCATCTACGATCCGGACTTCAACAACTATTTCTCTCCTCCCTCCTATGAAAAAGCGGCCTCCGTGCTGCACATGCTGCGCTTAAAGATTGGCGACGCCCACTTCTTCCAG…
13432	c_000000003372	7465	8473	f	FlgD Ig-like domain	PF13860	ATGCGTTCAAACATCATGGCCGCCACCCCCGAACAGTTTTCCTTCGCCAACGACCTGCTGGTCGTGGACGAAACCAGGGACGGCAACGGAGCCAACATCAACCCCACCGACGCAATGGTGGACGACTTTTACGCCGCCGCTCTCGCTCCCCTCGCTTTTGGCACCTGGGACATCGCCCAGAGCGGGATGCCTCCCTTGGGAGTGCTGGGGCAGTATAAACTGGTGCTCTGGCATGCCGACGACTTCAACCAGAACCTGTTGCAGGACAACAATAATCTGTTGGGCGGCTATCTTTCCGGCGGAGGCAAGGTCCTGTTGAGCGGATGGAAGACTGTGTCCGTGTTTTCCAGTTCCTTCCTGGACAGTTTTGCCGAGGGAGTGGAACTTGTGTACAACAAC…
13433	c_000000003372	9130	9604	r	AcrB/AcrD/AcrF family	PF00873	TCCTATACTTCCCTGGCTTTCGGATTCCTGGTCGCCCTGCTGGCAATCTTCGCCATTCTGGCCTCCCAGTTCCGCAGCTATGTACAGCCGCTGATCGTGATGCTGACCATTCCCTTCGCCTTCATCGGCGTGGTCTTCGGCCTGCTGGTCACCGGCCTGTCCTTTTCCCTCAACACCATGCTTTCGGTGGTTGCCCTGGCAGGGGTGGTGGTCAACAACGCCATCCTGCTCATCGATTTTATCAACAGCGAGCGGGGAAGCAGGCAAGGACCGCTGGCATGCCATCATCGAAAGCGGTTCCGCGCGCCTGCGGCCGGTGATCCTCACCACCACAACCACAGTGGCGGGAATGCTGCCCCTGGTCTTTTCCAGCGATCCGTCTTCCCAAGCCTGGCGTCC…
13709	c_000000003436	0	132	r			ATGCCTCTGGTGCTCGGAGCGGGCGAAGCCAAAGCGTTCCACCTCAATCTGTGGGTGGGCAGCACCGGACGGGTGAAGTTCCATTTTGAGATCAACTCGCAGCAGTTGGGCACCTTCCGCATCCCCTTCGTG
13710	c_000000003436	227	791	r			GTGACGGTTTACCCCACAGTCGGCATCAACGGCAACCCGGTGATAATCGGCAACGTCCCGGCAGGTTACTATTGGAACGCGGTTTCCCAGTATCTCTACCAGTCCTCGCCGCTCAGGATGGAGCTGGATTCCTTCGACTCCTCCACTGGAGATGCTGTGATCACCGTTACCAGCCTCGATCCCGACCTCGCCCCGGGGAACTACACCCTGGTCTGGTATCTGCTGGAAAACGGCGTGCAAGGAAAGGACAACGTGGCGCGCCTGGTGGAAACGCAGTCCATCACCCTGCCTCCGACGGGGCAGCAGAGCAGCTTCAACCATAGCTTCAGCCTCGATCCCGCCTGGAACCAGGCCAACCTGTGGATGGCGGCTTCGGTGCGCACCACGGCTCAATCGGCT…
13711	c_000000003436	1041	2556	r			ATGCGAAGATTAGTATTTGCCCTGCTTTTAGTGGCGCTGTGCGCCGGACTGGCAGCCCAGAAATCGCCCATTGTCAACGGCCTCAACGAGGCACGCTTCATCTGGCGCGCCGCGGAGGACTCCCTCAACACCTATTTTGAGGACAGCTTTTCCTTCAGCCTGGCATACAATTACTTCACCTTCGGGCTCAAGTTCAACGCCGGGCTGCCCAGATACAGCACCGACCAGAACCAGCTTCTGGACGAGCTGCGCCCCGACGCCCTGAGCTGGGACTGGGAAGACCTCTACGCCAGCTACGCGCGCGACGTCTGGCTCATTCACGCCGGAAAGATGGAGGAGACCTTCGGCAGCGGGATGATCTTCCGCAGCTATGAGAACGTGGAACTGGACGAGGATTAC…
13712	c_000000003436	2688	2910	r	AhpC/TSA family	PF00578	CTGGCGCGCAAATATGACAGCCTCACCGTGGTGCTGGTCTCCCTGGACGCCCCCAAGGCGCAGGCCAAGGCGCGCGCTTTTTTGAAGAGCAAGGATTACAAGTTCGTCACCCTCTTCGATCCCGACAAAACCCTGGCCAAAAAACTGAACGTGGTCAACCCCCCCCCACACCTTCATCGTGAACAAAGAGGGCGAGATCGTGTGGTCGCACCTGGGATTTGA
13886	c_000000003481	1	556	f	Endonuclease I	PF04231	GGCGCAAAGGAATTCCTCTTTCAGGAACTGGACAACACCAATGGCTACGTGACCTGCATCTACACCGGCCAGAGCTACTACGTGGGCTACAACTACACCGGCTCGAACAACCCCAATACCGAACACACCTACGCCCAAAGCTGGTTCTCCTCCTCGGAATCCAGCCGCAAAAAAGCCGACCTGCACCACCTTTTCCCCTCCAACAGCGTGGTCAACAGCTCCCGCAGCAACTACCCCATTTTCACGGTGGCCAACCACGCCTCCGCCAACGTCTATTACAACGACACCCCCTGGCAGAGCTACCGGGGACAGTCCGCAACCGGTTACACCGTCTTTGAACCAGCCGACGAATCCAAGGGCGACATCGCCCGCGCGCTGCTCTATTTTAACACCCGCTAC…
13887	c_000000003481	972	2409	f	Zinc carboxypeptidase	PF00246	ATGCGTTATTTTCTAATAGTTGCCACCTTGCTGGCCGTATGCGGGTTATGGGCCCAACTGGCCGATTTGCCCACCTGTTACAACACTTATGATGAGATCACGCAGATGCTGGCCGATTACCAGGCCCAACACCCGGATATCGCCCGCCGCGTTCTGATCGGCTATTCCCAGCAGGACAACCTGCCCATCTATGCCATGCGTATCTCGGACAACGTGGAAAACGATGAAGAGGAACCCGCCTTGCTCTTTGTGGGACAGGTGCACGCCGAGGAGGTTCTGGGAGTCCAGATCACCCTGAGCAACATCGAGGAAATCCTCACCAACCGCACCAACCAGCCTTATGCCCAATGGATTAACTTCCTCGACATGTGGTTCGTCCCAACCCTCAATCCCGAAGGC…
13888	c_000000003481	2380	2764	f			ATGGCAAATTTCTCCCTCGAAACCTTTGAGGGACAATATACTATTGAGGTCACCTCCCCTGGCCGCTATCCCTACCTCGGCACCATGGAAGTCAGCCCTTCCCAGAACCAATTCCATTTCCAGCTTGGCGAGGCCAACGTTTACTTCAGCGAAGACTGGGAGTCCGGCGTTGACGGCTGGAACATCCAGGGCCCCTGGGTGCTGCAGGACCAGCTTGCCGCATCCGGCCACGCCATCACGGACAGTTGGGGCGGCTGGGGCTTTTACGAGATGAATTGCGATGTCTGGATCAGCACCGGGCAACCCATCAGCATCCCCGCCACAGCCAACAATATGCTCGCCTTCGATTCGCATGTTCACACCGAATACGGCTACGATTTCGTG
13917	c_000000003489	413	1601	f	DNA / pantothenate metabolism flavoprotein	PF04127	ATGGATAAAAACATACTGCTCTGCGTTAGCGGAGGAATAGCCGCCTATAAGGCAATTGATTTGGCCAGCCGCCTCACCAAGGGAGGCTGCAAGGTGAAAACCATTCTAACGGACTCTGCCACCCAGTTTGTATCACCGTTGAATTTCAGCACGATAACCCACAACAGCGTCCACAGTTCCCTGTTTACAGATACGGATCCAATACCACACATCACTTTGGCGGATTGGGCGGATAAGATTGTTGTGGCTCCTGCCACAGCCAACATCATGGCCAAGGCAGCGCATGGAATCGGGGACGATTTGCTGTCCACAACCTTACTGGCGGCACACTCCCCAGTGCTATTTGTGCCTGCCATGAACGTGAACATGTATCGCAACGCCGCAACTCAGGCCAACATG…
13918	c_000000003489	1585	2347	f	Enoyl-(Acyl carrier protein) reductase	PF13561	GTGGAACGCAAACTAACGATCATCACTGGAGCCAATGGACAGGTTGGCAGCTTTCTGGCGCGTATCTATTCCGAAAGCCGCAATCCCTTGCTGTTGCTCTATCACAAGAAAACAGACCGGATCATAGATTTGGATAAGTTGCCCGGCGTAACGCTGAAGTCCTGCGATCTGTGTGACCCAGGCCAGGTGAAGCAGGTGATTGCCTGCGCCTCGCGGGACAACTCCGCCGTTCCGGCTTATCTGATCCATACCGCTGCGGTGCGAAGCTCGGATGCCAAAAGCGTGGCGGAGGGTGATCCTTACACTTTTGCCAATGTGTTTAGGCAAAACCTCATGGGAGCATACAATATACTGCGCTACACTCTGCCAGCGATGCGGGAGAAAAAGTTTGGCAGGATA…
13919	c_000000003489	2362	2701	f	Protein of unknown function (DUF3108)	PF11306	TTGAAATATAAAGCTTTCATTGTTGCGATCATCCTGCTCTCCCTGTTGAAAGGTCTGGGCGCTGTGCCCTTTCAGGATGGTGAAAAACTGACCTTCAACGTAAAGTATGGGCTGGTCTCTGCAGGGTCAGCTGTGATGGAGGCCAGGTCATCCACCTATCAGGGCCGGAGCGTGTGGTATCTGAGCACCAACGCCAGAACCCATCCTTTCTTCGATTCATTCTTCCGCGTGCGGGACAAGGTCGAATCCTGGTGGGATAAAGATGACCTGTTATCTCACAAGTTTTTCCAAAACCTTGCAGGAAGGAGGTTACAGGCAGTACCGTATTCACACATATGA
14700	c_000000003701	1	961	r	tRNA synthetases class II (D, K and N)	PF00152	ATGCAATCCAGGGACAATCAGTTTATCCAGCTGCGCAAGCAGAAACTGGCCAAGATAATTGCCGCCGGGATAGACCCCTATCCCGTCCGTTCTTCCCGCACGCATCTGATTTCAGAGGCTTTGAGCGATAAAGACGGCTGGATCTCCTCCGGGCAGGAAGTGTGCCTGACCGGCAGGCTTGTTGCCATGCGCCGCCAGGGCAAACTGGGCTTTGGCAACCTTGAGGACGCCAGCGGAAAGATCCAGATCTACGTGGCTCAAAACCAAGTGGGCGAAGAGAACTACGAACTATTCAAGCTCTGCGATCCGGGCGATTTTGTGCAGACAAGGGGCAGCCTCTTTTATACCCAGGCGGGTGAATACTCGCTAAAAGTGCTCGAACTGACCCTGTTGAGTAAA…
14701	c_000000003701	970	1504	r	S1 RNA binding domain	PF00575	ATGAGCCGCAGCCGCAATATATCGCATCCCCGCGAAGTGGTGAAAGAGCAAGACTACGTGGAAGTGCAGATCTTGCGCATCGATCCGGAAACCCAAAAGATTTCCCTTTCCCTCAAGGCTTTGCAAGCCGATCCCTGGGACAATATCGATGAACTGGCCCCGCTGGAAAAACCTTTTGAAGGCATCGTGGAAAGCTCCACAAATTATGGCGTGTTCGTGACCATCACCGAAGGAATAACCGGGCTTCTGCCACGTTCCCGGATACGTAAAACTGACAACTTTAACCCCGGCGACCCCATCACCCTGATGGTTACAGCCGTTGATAAAGAAAACCACCGCGTTACTCTGGATTATATCGACAGATCTCCGGACGAAGTGGTCGAAGAACGCCCCCGCAGG…
14702	c_000000003701	1519	2467	r	S1 RNA binding domain	PF00575	ATGTCAGACAAGGTGAGTGAAACCAGCAGCAAATCTGCTATCAAAGAACTGAGAGAAGATTATCTTCGCCTGCTCGAAGAATCCTTTCAAAACAATGCGGAATTCAAAAAAGGCGACGTCGTCGAAGCCCCCATTGTCAGCATCAATGAGAACTATATCATTGTGAACCTGGGTGGCAAGTTCGATGCCTACGCCGATGTCAGCGACTTTGCCGACGAGAAAGGCGTGCTTGGCTACGCCGTCGGAGACACCCTGAAAGGTTATATCGTGGACAGCAACGATCAGGGTTTCGTTATAGGCAAAAGCCTGACCAAACAGCATGTGGATAAGAAATCACTACTGGACGCGTTTGAACGCAAGATTCCCGTGTCCGGAAAGGTCTATGCCGTCACCAAAGGC…
14703	c_000000003701	2729	3947	f	Domain of unknown function (DUF4147)	PF13660	ATGCACCTTTTTTGCCAGTATCCGCAACTTACTGAGTTACTTGGCAAACAGGTTTTTGCCTCCCGGGTCAGGATTCTCGCCATCGGCAAGGCGGCTTGGAAAATGGCCTCTATGACAGCCCTGCATTTGCGGCAGCGGGATATCCCTTACGATGGCTATGTGCTCACCCGCTACGGGCTTTCCCTTGGGGAAATCCAAAACCTTGAAATTTTGGAAGCAGGCCATCCTCTGCCCGACGAAAACAGCATTGCCCACAGCGGCAGGATCGCGCCTGGCTGCGCAGCATCGGCCGGGGATGATCTTGTGGTCTTGCTTTCCGGAGGCGGCTCAGCCCTCTTTGAGCTTCTGCCCCCTGATATGACGCTCCCTCAATTGATTGATGCCCACAAACAACTTATC…
14704	c_000000003701	3943	6082	f			ATGACGCGCAGATTTATCCTGCCTTTGCTGCTCCTGCTCTCTCTGGCGACGCTATGGGGACAGAGTGAGACACCGCTTACCATTGCCGATCTCGCTTCCGCACCAGATACTCTCTCATTGGCTCCGGCGAAACTGGACTCCCTATTTTACGCCGCGGACAGCGTGGCTTACAATTATTCCGCAGAACAGATACGCCTCTTTGGCAGTTCCAGCGTGCGTTATCATAACTTCGACATCAGCAGCGACTCCCTGATGCTCGACCTGAAGACGGAAAAAGCTTACAGCTACGGCAACACGGTGATGAAGGATGGAGACCAGATTCTGCTGGGAACCACTGTTGCCTATGATATCGACAGCCAGACCGGACTGCTTTCCAGAGGCGTCAGCAGGCTGGAAAAC…
14921	c_000000003762	0	1674	f	Chitobiase/beta-hexosaminidase C-terminal domain	PF13290	GTTAAACTCGGATCAAACGGCAATGAATGGTCCTCGACAAATAGCGTAACACTGAGCGGCACCCTTGCAAACAACGATGTATTTGTGATCGCCAACTCTTCAGCCAATGCCACGATACTCGGTGTTGCAGACCTTACCCATACTGTAACATATTTCAATGGCAATGACTGCCTGGGGCTTTTCCAGGGAGATACAATGATCGATATCATCGGCATCTATATGAACAATCCCGGTACAGCCTGGGATGTGGCGGGCGTTACTGGAGCGACACTCAATCACACCCTGATCAGAAAACCTGAAATCACACAGGGTAACACAGACTGGACCAGTTCAGCCGGAACCAATGCAGACAACTCCGAATGGATCGTCCACGAGCAGGATTATGTAGCCAACCTGGGC…
14922	c_000000003762	1670	2450	f	Chitobiase/beta-hexosaminidase C-terminal domain	PF13290	GTGACCCTGTCCGGCAGCCTACCCAATGGCGCAGTTTACGTGATCGCAAACGCAGGAGCAAGCGCGGATATCCTCGACGTTGCCGATATCACCCATACAGTGACCTATTTTAACGGCAACGACTGTCTGGGTTTGTTCCACGGGGAAACCCTTATCGACATCATTGGCGTTTACCAGGAAAACCCTGGCACCGCCTGGCCTGTGGCAGGAGTTGAAGGAGCCACCTTCAACCATACTCTGATCCGCAAACCTGCCGTCACCCAAGGTAATATCGATTGGGCTTCCAGCGCCGGTACGAATATGGATGATTCAGAATGGCTGGTCCACGATATGGATTACACAGCCGATCTGGGAACTCATACCTATGAACCCGGAGGTGGCGACCAGGTGGCCACACCA…
14923	c_000000003762	2439	3189	f	FlgD Ig-like domain	PF13860	ATGATCGATGACCCATCCGGGATCATTACCAGCAACTACAACATCAGAGATGGAATACAAGGGCTTACCGGTACGATCGTCCGCTACAACAACATGCTGGAACTTGTTCCCACCGTGAATCCAGGCCCCGCCAGCTCAACTGGCAACCCCCTGAACATTCCTGAAGTAACCACAGCCATGGTTAATGCCAACGTAGAGCAGTACCAGGCACGTTTGGTCCGCTTTGAAAACGCACACTTTGTGGAAACAGGTAACTTTGCCAGCGGCACAAATTACACCCTGGAAGACAATGCTGGAACCATTGTATTCCGCACTGTCATATACGAAGCGGATTACATCGGCCAACCTATCCCATCCGGAAACATGACCATTGCGGCTATCGTCAGTCAGTATAACCAA…
14924	c_000000003762	3265	4129	f	EamA-like transporter family	PF00892	GTGGGAGCGGGGATAGACCCCTACACGCTCACTGCCTGGCGGTTTGTGATCGGCGGCCTGGCAATGTTGCCATTCGCGATCAGGCAACTCCTGATAAATAAACCAGAATTAGGCATTGGCAGCATACTGCACATCGGCGCGCTGGGAATAATCAACGTCTGTGCCAGTATGCTGCTTTTGCAATTGTCGATATTCTATGGCAAGGCCTCTCTCTCGGCTGTTATCGTAGCCATGAATCCCCTGTTTGTCACCCTCTTTGCCAGATTGATATTGAAAGAAGGATTGAATCTGCTGCAGTTCGTCTTTTTACTGCTGGGGATTTTTGGCCTCATTATGATCATCCTCACCGAACAAAACTATGGTAGCACAGAGTATCGCAATCTCCCGCTGAGCATCTTG…
15273	c_000000003860	42	975	r	Ribonuclease HII	PF01351	ATGAACAAACAGATTGAACACTTTCTTGCCCACTTTCTGCCCGAAATTGCCCGGATCGGCATCCAGGTGCTCTCCCAGCGCGAGATCGACTATGGACTGCAACTGCGTTTGGGCAGGGAGGGCGAGCAGACCACGCTCAATATCTACCACTCTGAGAAAAAGGGAATTAGCACGGTGCTCGGCAAGGGCTCGCCCAGCCAGTTGAAGCTTGATCTGGAACGCGTCTGCGAAGAGCTCGCGGAACCCCGCGTGCCCCTGCACGAGTGGGAAAGCTGGATCGGTTCGGATGAGTGCGGCAAGGGCGATTACTTCGGCGCGCTGGTGGTGGCGGCGTTCGCGGCGGACGAGGCCTGCCTGGAAGAGCTGCGCGCCCTGGGCGTGAAAGACAGCAAAAAGCTC…
15274	c_000000003860	1266	1638	f	TCP-1/cpn60 chaperonin family	PF00118	GTGGTATTGGACAAGAAGTTTGGTTCTCCGACCATCACCAACGACGGCGTGACCATCGCCAAAGAGATCGAACTGGAAGGGGAATTTGAAAACATGGGCGCGCAGCTCTGCAAAGAAGTTGCGGAAAAGACCCACGACGTTGCCGGAGACGGCACCACCACCGCCACCCTGCTGGCCCAGGCCATCATCGAGGAAGGCCTCAAGCACGTGACCGCCGGGGTGAACCCCATGTATCTGAAACGCGGCCTGGAAAAGGCCACCAAGGTCGTGGTGGACAAAATCCACGAGTTTCCAAGACCATCAAGAGCAGCGAAGAGATCGCCCAGATCGCTTCCATCTCCGCCAACAACGACAACGAGATCGGAAGGCTGA
15275	c_000000003860	2016	2787	f	TCP-1/cpn60 chaperonin family	PF00118	ATGCTGGAAGACATTTCCATCCTCACCGGCGCCACCCTCATCTCCGAAGAGATGGGACGCCGCCTGGACAGCGCCACCATGGCCGACCTCGGCCGCGCCAAGAAAGTCCTGGTGGACAAGGAAAACACCACCATCCGCGAAGGCGCCGGCTCCGAAGAAAACGTGGCCGCCCGCATCAAGCAGATCAAGGCCCAGGTGGAGGAAACCACCTCCGACTACGACAAGGAAAAGCTCCAGGAACGCCTGGCGAAGCTTTCCAGCGGCGTTGCCGTGATCCGCATCGGCGCAGCCACCGAGACCGAAATGAAAGAAAAGAAAGCCCGCGTGGATGACGCTTTGCACGCCACCCGCGCCGCGGTTGAAGAAGGCATCGTCCCCGGCGGCGGAGTGACCCTGATC…
15276	c_000000003860	2980	3130	f			ATGACACAGCTTTATAGCCTGGTGGTGCTTGCTTCGGAGACACCTCCTTTCCACTATTCCACCCTTTCAATTTACACAATAAACATCCTGAAGATCCTGTTGATCCTGTTATCCGTGTTCTATGTAAAGTCCATGGAAAGGTGTCTTTAG
15277	c_000000003860	3630	3846	f			ATGAAACGCGTGGAAAAGGCGCGCAAATTGGATAGATTGGCGGAGAAGTTCAAGGCGGAAACAGGATTTACAGGACGGGTTGACAGAGCCTATCAAAGAAACTGTCTAAGCCATTTCAGGGGCAGTTTTCCAGGTATTAGTTTCCCTGACCTGGCGGATACCCTGGCAACGCGGCAAGCATTTGACTCCATCATGGGGAAGATTATGCCTTACATA
15624	c_000000003949	276	720	f	CorA-like Mg2+ transporter protein	PF01544	ATGATCCAGTTATTCAAGATAGCCAATCAGAAATTCACTCCCGCTTTCACGCAGGACGAGGCTTTCTGGATAAACGTGGAGAATCCCACCGAGGAAGAGTCCAAGGCTCTGATGGAACGCTATGATCTGGCTGAGGACTTCATCACCGACCTCCAGGACGCCGACGAGAACAGCCGCATGGAATACGATGAGGGCAACATCCTCATCATCCTGCGCGTGCCGCTCTATTACAGGCACCAGGCGGCCAATATTTCCTTTACCACAGCGCCTTTGGGCGTAATCATCGTCGAAGACAAGATCATCACCCTCAGTTTTTACGATAACGAGGTTCTCACCCAATATATCGATTGCAAACACCGTCCCTTCAGGATCACCCAGCAGAGCTTTTGCTGCAAATCG…
15625	c_000000003949	662	1208	f	CorA-like Mg2+ transporter protein	PF01544	TTGCTGCAAATCGCGCTGCGCACCTCGATCTATTACCTCAAGTTCCTCAAAGAGATAAACCGGCGCACCACCCGCATCGAGAACGAACTGCACCAATCGATGCGCAACAAAGAGCTGATCCAGTTGCTGAGCCTGGAGAAAAGCCTGGTCTATTTTTCCACGGCGCTCAAGTCCAACGAGATTATCCTGGAGCGTTTGCAACGCTCGCGCTGGCTGCAACAGGATCCGGAAGCCGATGACCTGGTGGAGGACGTGATCATCGAAAACAAACAGGCGATCGAAATGACCAACATCCACACCAGTATCATGAGCGGCACGATGGATGCCTTCGCCTCCATTATCTCAAACAACCTCAACGTGCGCATGAAATTCCTCGCCGCGGTGGCCTTCGTGCTGATG…
15626	c_000000003949	1220	1592	f	6-pyruvoyl tetrahydropterin synthase	PF01242	TTGTATAAACTAAGCGTTACAGACACCTTCAGCGCAGCCCACCGCCTCTGCGGATATCAGGGCGCCTGCAGCAACCTGCACGGCCACAACTGGACGGTGCGGGTGAGCCTGGAAGCCGACACGCTCGACGGGATCGGCATGGCCATGGATTTTGGAGTGATCAAGGCCAGTCTGGGCAAAATCCTGGAGGAGCTGGATCATGCCTATCTGAACGATCTGCCGGCCTTTCAGAAATGCAATCCCACCTCGGAAAACCTTGCCAGATACATCTTTGAGCGTCTGGAAAAGGAGCTTGGCGGCTCGCCCGCGAGGGTTTGCGCGGTGGAAATCTGCGAATCCGACCGCTCCAGCGTGGTGTATTCCCATGCTTAG
15627	c_000000003949	1867	2194	f			ATGGCAGAGCGCGAAAGCTGGCGCAAGATGCTGGAAAAGTATTTTTACCAGCGCGGGCAACTGCGCAGCATCATCGTGCTGGTGGATATCCGCCATCCCGCGGACGAAAAGGATGTCCAACTGCTGGAACTGCTGCGGCTACGCAAGTTTGACCATTGCGTGGTGGCGACCAAGGCGGACAAGATTCCCAAGACAAAAGTCGCCAGGACCCTGCAGTTGCTTGCCAAGGGACTGGGACTGGAGGATACGCCCCTGTTCGCGGTTTCAGCCCTCAAAAACAAAGGCCTGGAGCAAATCTACGCCTGGATGGCGCAACGGGTGGATTGA
15628	c_000000003949	2202	3882	f	Glucose inhibited division protein A	PF01134	ATGCGCTCCGATTTTGACGTGATCGTGGTGGGCGGCGGGCACGCTGGCATCGAGGCAGCCCTGGCAGCCGCGCGGCGGGGAGCGCGCACCGCCCTCTTCATCATCAAGATCGAATCCATCGGCAGGATGAGCTGCAACCCTTCCTTCGGCGGGCCCGCCAAAGGGCACCTGGCGCGGGAGATCGACGCCCTGGGCGGAGAACTTGGCTACAACGCCGACCGCTCCGGCATCCAGTTCCGCATGCTCAACCGCAGTAAAGGCCCCGCCGTCTGGGCGCCGAGGTCGCAAAACGACCGCCAGCTCTATTCCTCGCTCATGCTGGCAAGCGTTGAGGGACAGCAGAACCTGCAACTGCTGGAAGCGGTTATCTCCGAACTGATCGTGGAACAAGGCAGGGTC…
15629	c_000000003949	4045	4774	f	Cytidylyltransferase	PF02348	ATGAAGACAGCCGCAATCATTCCCGCCCGCCTCGCCAGCACCCGCTTTCCCGCCAAAGCGCTGGCCGGCCTGAATGGCAAACCCCTCATCCAATGGGTCTGGGAAGCCGTGCAAGGCACCGGACTCTTTGACCAGGTGCTGGTTGCCACCGATGCGCCCCAAATCCTGCAAAAAGTGAGGGAATTCGGCGGCTCAGCCACGCTCACCCGCGCCGAACACGCCAGCGGAAGCGACCGCGTTGCCGAAGCAGCCGCGGAACTGGATGCAGAGCTGATCTTCAACGTGCAGGGCGATGAACCGCTCATCGACGCCCCTTCGCTGAGTTCGCTCCTGGAGGCCTTTTCCTGCCCCGAAGTGCGGATGGCCTCGCTGATGACCCCTCTGGATGACCCCCGTGAA…
15630	c_000000003949	4757	5510	r			ATGAATATTTCAGCGGCAGTTTTCGGCTGGAGTAAAACCTACGCGGAAAGAAAGGTGCGCTATGCCTCGCTCAACGCATGGGTTTACAACTTTCACTATGACCTGAGCCTGGATCCTTACTACTGCTTTTCAAGCGTCATGAGCGCCAACCTGTACCTGGCCTCCAAAATCAACTTCTTCGCCAGCGGTTACTTCCACGATAAAGTCCAGGATCTGAACAAAGACCTGCACAAGGCCTATGACGCGTCACTTGGCTTCTACTGGTACAAACTGAAAAGCTTCCGCGTCCTTGGTAACTATTTCTTTGGAAGAACATTGGTTTACGCGCTCAGCGAGGTCTATCCGCAACACAAAATAACCATCAATACCGCAATCTATCCTGTGAAAAACCTGAGCGCA…
15631	c_000000003949	5518	5851	r			TTGATCAATCCCGACGACTATTTCCAGGTCCTGGCCGTCAACCCGAGCTGGCGCAGGTTTCAGATGAGCAACGGGATAGTCAGCCGGGTAAACAAGGGCTATTACAATCACGTTTACACAGGATCCGCCAATTGGGAATACCTGCCCAATCTCTATGCAGCTTATGAAATGATTATCTCATTGCGGGACAAGGAGTCTGAAAACTTGCCTGACCCCCAGAAAGGATACTCTGGCAGTTTCAAACTGCAGGCTAAGCCCGGCGATTTTAACTTCTCTGTGGGATACAGAAAGCTTTCCAAAAGACCTTGCCCTGGACGCGGGCCATCTGTATGA
15632	c_000000003949	5900	6869	r			ATGAAAGCCCTGCTCTGCCTGTTTACGGCTCTATTGGCAATCCACTGCGGCGCGATGGTGCTGCCCGACTCCAGTGAACCTGTCCTGGAAGACAGCAATCTGATCAGCAACTGGGTGCGCATCGATCCAGAAGACAAGAAAGCTGAAACCCTCCCCACCCAGGCCTGGGTGTGGCAGGACGGCGGCAACCTGATGGTGCACCTTGTGGCGCGCATCGACTCCACTTTTACCAAAGGCTCGATATCCGTGAAGGATGAAGGCACCCAGGCTGACTATCTGCGGGTGCAGTTGATAACCATTCCGGACGCCTATTTTGCCTATTACTATGCCGCTTATCCCCTGGGAAACCTGTTGGACGGGGTGCGCGACGAATCTATGGACGTCGATTATGCCTGGGAC…
15758	c_000000003973	2	2639	f	RNA polymerase Rpb2, domain 6	PF00562	GACGAAGTGGACGATATAGACCATCTTGCCAACCGCCGGGTGCGCACTGTGGGAGAGTTGCTTCAGGAACAGTACAATACCGGATTGGCGATGGTCGCCAGGATCATTCAGGAACGCATGACGATTGCCAATACTGACGAGATCACCGTGCATGACCTGGTAAACAGCAACGCTTTGATCTCGGTGGTGCAGTCTTTCTTCCTAACAGGCCAACTGTCCCAGTTTATGGAACAGACCAATCCTCTGGCAGCCCTGCGTCATAAAAGAGCTTTTTCAGCTCTTGGGCCTGGAGGTTTGACCAGAGAAAGAGCAGGTTTCGAAGTCAGAGACGTACACGCGTCCCACTATGGAAGAGTGTGCCCGATTGAAACTCCCGAAGGACCCAATATCGGCCTTATT…
15759	c_000000003973	2641	2854	f	RNA polymerase Rpb1, domain 1	PF04997	ATGTTAAAAGATAACAAACGCGAGATTCGTCCCAACGAATATGATTATGTCCGCATCAGACTGGCCTCCCCGGAAACCATTGAAGAATGGTCAAATGGAGAGGTCACAAAGCCGGACACCCTCAACTATCGAACCTTGAAACCCGAAAAGGACGGATTGTTCTGCGAGCGGATTTTTGGCCCGGAACGGGGATTACGAATGCGCTTGCGGTAA
15760	c_000000003973	2816	3110	f	RNA polymerase Rpb1, domain 1	PF04997	TTGGCCCGGAACGGGGATTACGAATGCGCTTGCGGTAAATATAAGAAGAAACGTTTTCAAAACACAGTTTGCGATCGATGCAATGTGCTGGTTACCACCTCCAGGGTGCGCAGAACCCGCATGGGGCATATCTCGCTGGCTGTGCCGATCGCCCACATCTGGTTTGTCAAAAGCGCCCCCAGCAAGATCGGAACCCTGTTGGACATGACGGTCAAGGATCTTGAGCGGGTACTGTATTACGAGTCTTTTATCGTGATAGATCCGGGTGACAGCCCCTATGAAAATTCGAGTTGA
15761	c_000000003973	3164	3371	f			ATGATGGGAGCTGAAGCGATCCGTGAGCTACTGAGCAGAATCGATCTGCATAACGAAGTGCTGAACATACGTTCCCGCTTAAAAATGGAAAAGGCCACTCTGCACAAGCAGAAACTAATCAACAAGCTCAAGATCGTGGACGCTTTCCTCAAATCTGGCAACAGGCCTGAATACATGATCATGGAAGCCCTGCCCGTGCTTCCTCCC
15830	c_000000003990	215	815	r	Outer membrane protein beta-barrel domain	PF13505	ATGAGAAAAATAGTTCTTATTCTTCTGGCAGTATTCGCGGTTGGAGCGCTGAGCGCTTTCAACCAGGGAACCATCAATCCAGGTGGCTATGTGGCCATTTCCTCAGTAAAATACGATTCTGATGACGATGCCACGACAGGCATCGTAATTGCCCCCCAAATCGGCTATTTCGTGATCGACAACCTGTCAGCGGATTTAATGCTGAGCCTTGGCATGGATTCACAATCCGGTGATTATGCCGGCGAGGATTACAAAGACAGCTCCACCAGCCTGGGTATCGGCCTTGGCGCCAGGTATTTCTTCCTTAACTTCTACGGCGGCCTGGGTTTCAATTATGAATCCTATAGCAATAAAGAAGAAATGGGTAATCTCGAAGAAAAGTACAGCTCTTCCGCCATG…
15831	c_000000003990	1059	2148	f	NIF3 (NGG1p interacting factor 3)	PF01784	ATGCTGATCAAAGACCTGCTGAACCATATCGAGACCTTCGCCCCGCTGGCCCTGGCCCTGGACTGGGATAATGTGGGCCTGCTGCTGGGCGACCGTGCCGCCACGGTGAACAAAGCCCTGGTGACCCTGGATGTGACCCCGACCGCGGTGGATAAAGCCATTGAGCGCGGCTGCGACCTGATCGTCTCCCACCATCCCCTGATCTTCCGCCCCCTCAAGAGCCTCACCGATCCCCTGCTGCTAAAGCTTGCCGCGCGTGGAATCGCCGTGATCTGCCTGCATACCAACCTGGATGTGGCGCCCTACGGAGTCAACCATGCCCTGGCGGACGCCCTTGGGCTGCAGGTAACGGGCAGGCTCAGCCTGGAAACGGGAAACCGGTGGCAGCACATCTCGGTG…
15832	c_000000003990	2278	2716	f	Ribosomal protein L13	PF00572	ATGAAAACCCTTACACCGAGCCCCAGTGACATCCATCGCGATTGGTATGTCATTGATGCCACGGGTTTGCCTTTGGGACGTCTTTCCACAAAGATCGCATCCATACTCTGTGGAAAGAACAAGCCCTATTACGTGCGCAACATCGACACCGGCGACTTCGTCGTGGTCATCAATGCCGAAAAAGTGCGCGTAACCGGCTTGAAAAGCCTGCAGAAGACCTATAAGACCTTCAGCGGCTACCCCAGCGGTCTCAAGGAAATCCCGTATCAAAGGATGCTGGAAAAGCATCCCACCCAGATCATCGAACACGCCGTCCGCGGCATGATGCCCAAAACCGTGCTGGGCGACGCGATGTTCAAAAAACTCAAAGTCTATGCCGGCAGCGAGCATCCCCATGCC…
15833	c_000000003990	2720	3149	f	Ribosomal protein S9/S16	PF00380	ATGCAAACTTACGATGCCGTTGGCAGAAGGAAAAATGCCGTGGCCCGCGTCCGGATCGCCCCGGGCACCGGAAAGCGCATCATCAACAAGGTTCAGATGAAGAAATACCTGCAGCGCGAGACCCTGGAAATGGTGGTCGAGCAGCCCTTGCAGGAGCTTGGACTGAGCGAGAACTTCGACGTCTATGTCAACGTTTCCGGCGGCGGACTGAGCGGTCAGGCCGGCGCTATCCGGCATGGCATTGCCCGCGCGTTGCTGGAGTATGACGAAAACCTGAAACCCACCCTCAAAGCCCGTGGCTTCCTCACCCGCGACTCCCGCATGGTGGAGCGTAAAAAGAGCGGAAGACCGAAAGCCAGAAAGAGATTCCAGTTCTCCAAAACGTTAATCCTCTGGGTT…
15834	c_000000003990	3277	4099	f	Ribosomal protein S2	PF00318	ATGTCCGTAGTTTCGATGAAACAATTGCTCGAAGCTGGCGTCCATTTTGGTCATCAGACCTACAAATGGAATCCCAAGATGAAGAAGTATATCTTCATCAAACGCAATGGCATCCATATCATTGATCTCAAACAGACCGTGGACGCGATCAATGAGGCCTATCAGTTTGTCAAAGAAGTTGCCAACCGGCAGGAGTATATCCTCTTTGTGGGCACCAAAAAACAAGCCCAGGCAGCGATCAAGGAAAGCGCCGAAAAAGCCGGCGTGTTCTACGTTAATCAGCGCTGGTATGGCGGCATGCTCACCAACATGGCCACCATCCGCCAAAGCATAGAAAAAATGAAGTATTACGAAGATATCGTCGCCGACGGCACGATCAGCAACTACACCAAGCTGGAA…
15835	c_000000003990	4169	4769	f	Elongation factor TS	PF00889	ATGGCAGAGATTAGCGCAAGCATGGTAAAAGAACTGCGCGAGAGAACGGCAGCCGGCATGATGGAGTGCCGCAAAGCGCTGGTGGAAACCAATGGCGACATGGACGCCGCCATCAAGTATCTGCGCGAACGCGGTATTTCCAAGGCCGAAGGCAAAGCCCAGCGCGCGACCAAAGAAGGAATCATCTTTTCCTATATACATTTCAACGGCAAGCTCGGCGTGATGCTGGAACTCAACTGCGAGAGCGACTTTGTGGCCCGCACCGACGAGTTCAGGCAACTGGCTGAAGAGCTGGCCCTGCAGATCGCGGCCACCAGCCCCCTGGCCATCAGCGCCGAGGGCATCGACCCCGCCATCATCGAGCGTGAGAAAGAAATCGCCCGCAACAAAGCCATCAAC…
15836	c_000000003990	4789	5419	f	Amino acid kinase family	PF00696	ATGACCTACGAGCCCGCAAAGATTCACAGCGTGATGCTCAAGCTGAGCGGCGAAGTCCTCGCCGGCAGCCGGGGTTTCGGCTATGATGACGACGTGATCGATACCCTCACCGATGAAATCATCAGCCTCAAACGCCTGGGCTACAGCCTGGCCATCGTCTTGGGCGGGGGAAACATCTTCCGCGGCGGCACCTGGAAAAACCGGAGCCTCAACCGCGTGACCCTGGACGAAATCGGCATGCTGGCCACTGTGCAAAACGCCCTCTATCTGTCTGAAATCCTGAATGCCAAAAACTATCCCTCGGAGGTCTTTTCCAGCCAAAACCTGGATCGCATCTGCAGGCATTACTCGCCCCGCAAGGCCTCCCTGGCCCTGGCGGCGGGTAAGATCTGCTTCCTC…
15837	c_000000003990	5541	5883	f	Ribosome recycling factor	PF01765	ATGGAAGAAATCAAGAACACGTCCAGCGATAAAATGCAAAAGTCCTTCGAATCGCTGCTGCACCAGTATTCCAAGGTGCGCACCGGCCGCGCCAGCGCGTCTGTTCTGGACGACATCCGGATCAACTACTACGGACAGCCCACGCCGGTGAAGCAGCTTTGCAACATCTCGATCCCCGAGCCCCGCACCATCGTGATCCAGCCCTGGGACAAGACCACCCTGGCAGATATCGAAAAGGCGATCCTGGCAGCTAATCTGGGCATCACCCCGGAAAACGACGGCAACGTGATCCGCCTGCCCTTCCAGCCTCTCACCGAGGACAAGCGCAAGGATATCGTCAAA
16390	c_000000004125	203	713	f	Carbohydrate phosphorylase	PF00343	ATGAAAGAAGGTTTCATACCCAAAAACGATTATAAGTCCATATTCTTTACAGATAAAGCGGAAAGCTGCAGCGAAGACATCAAAAGCCTGTTCCTGGGACATCTGGAATACTCCCTGGTCAAGGACACCACCACGGTGCAGCCCTGGGACGTCTATTACGCCCTGAGCCTGAGCCTGAGAGACCGCCTCATCGAGCGCTGGTTGCGCACTCAATATGAATACCGCAAGCGGGACGTGAAAAAGGTCTGCTATCTCTCGATGGAGTTCCTGATGGGCCGCCTGCTGCGCAATACGCTCATCAATCTGGATGAATACAACAACAGCTACGACCTGCTCAAGGAATTCGGCTACGACCTGGAAGACATCGCGGAACTGGAGCCGGACATGGGCCTTGGCAAC…
16391	c_000000004125	712	1174	f	Carbohydrate phosphorylase	PF00343	GTGCAGGGCTATCAGGTGGAGGAACCCGACCACTGGCTCAAGAAAGGCTGCCCCTGGGAGATCAAGCGCCCGGATATCACCTACCGGGTGCGCTTCCGCGGCAAAGTGCTCAGTGACACCCTGCCGGATGGTCGCGTGCAGCAGCGTTGGGTGGACACCAAAGACGTGATGGCCGTGGCCTGGGACATCCCCATCCCCGGATACAAGGTGGACAACGTGAACAGCCTGCGCCTCTGGCAAGCCACCGCCACCGATGAATTTGACTTCGACTATTTCAACAGCGGCGACTACGTGCGTGCCGTGGAGGGGAAAAACATCTCGGAAAACATCTCCAAGGTGCTCTATCCCAAACGACAATTTCCATCTGGGCAAGGTGTTGCGCCTGGAGCAGGAATACTT…
16392	c_000000004125	1115	2003	f	Carbohydrate phosphorylase	PF00343	GTGAGCGCCACCCTGCAGGATATCTTTGCAGCTTTCAAGCAGGATCACGACTGCTTTGACGAGCTGCCGGACAAGGTGGCCATCCAGCTAAACGACACCCATCCCGCCCTGGCCATTCCGGAGATGATGCGCATCCTCATCGATGAGGAAAACCTGGTGCCCCAGCGGGCCTGGGATATCACCCGCCGCTGCTTCAGCTACACCAACCACACCATCCTGCCGGAAGCCCTGGAAAAGTGGAGCGTCTCGCTCTTTGAGGAGCTCTTGCCCCGCCATCTGATGCTGATCTACCAGATCAACAACCTGATCCTGGGCGAGGTGACCCGCCTCTATCCCGGCGACATCAACAAGATGCGCAGCCTCAGCATCATAGACGAGGGGCCGGACAAAGCCGTGCGC…
16393	c_000000004125	1999	2656	f	Carbohydrate phosphorylase	PF00343	GTGATCTTTGCCGGAAAAGCCGCCCCGGGCTACTTCCTTGCCAAATGGCTGATCAAGCTGATCAACAATCTGGGCGATGTGGTCAACGGCGATCCCGATGTGGCCGACCGCCTGAAAGTGGTCTTTTTGCCCAACTACTGCGTTTCCCTGGCGGAAAAGATCATCCCCGCGGCGGATGTGTCCGAACAGATTTCCACCGCCGGATATGAGGCCAGCGGCACCGGAAACATGAAGTTCGCCCTCAACGGCGCCCTCACCCTGGGCACACTGGACGGCGCCAACATCGAGATGGTGGAGGAGATCGGCGCGGAAAACATGTTCATCTTCGGGATGGACGCGGCCCAAGTGGCGGAGCTGCGCCAGCGCGGATACCAGCCCCTGGACTATTACCACGGCGAT…
16504	c_000000004158	2	1205	r	Urea transporter	PF03253	GTGATCAGGCAAAACGGCATTTCCGGGCTGCTCAAACTGGCCAGGTCGATACCCCACGCCTACGCCACGGCGATGTTTTCGGACAGCCTGTGGGTGGGGCTGGCCATGCTGCTGCTCACCCTGGTCTCACCCATCGTGGGAGGGGCGGGGCTGCTGGGGCTGCTGGCGGGTCTGCTTTCGGCCAGGATTCTGGGCTTTGAGGGATGGGACTCCTCCAGCGGGATCATGTCTTTCAACAGCTTGCTGATCGGGCTGGCGGTAGGTTATTACTATCCCTATGCCTGCGTGCTGTCAAGCCCCCTGAGCTTCGTGGCGCTGATAATTCTCGCCGCGGTCGGCACCCAACTGCTCTATGCAGGGGTAAACTACCTGACCCAGAGCTGGTTCAGGATGCCCTCC…
16505	c_000000004158	1201	2500	r	Pyridoxal-dependent decarboxylase, pyridoxal binding domain	PF02784	ATGAACAAATACGGCGCCAAGAGCGTGGTGAAATATCAGGACAAGATCGACGGTATCCCCATCAAAGAGATCGTGGAACAGTTCGGCTCGCCAGTGCTGGTGCTTTCTGAAAGCCAGATACGCCGCCGCTACCGACGCCTGACAGACGCCATGCAGATGCACTATCCCAAGGTTAAAATGGCGTGGAGCTACAAGACCAACTACCTGGGCGCCATCTGCAATATCTTCCATCAGGAAGGCTCCTGCGCGGAAGTGGTTTCCGGAATGGAATATGCCATGGCGCGCAGATTGGGCATACCCGGCAAGGAGATCATCTTCAATGGCCCGGGCAAGAAGAGGGATGAACTGGAGCTTGCCATCCGGGAGGGAGCCAGGATCCATATCGACCATCTGGACGAA…
16506	c_000000004158	2572	2746	r			GTGCGCCTCGCGGAAGGCAGTGGGCAAAACCAGCCCGCGGCCGTGGTGCTCAAAGCTTTGGGCAAGGAAGTGGAGGAGCTTCCCGCTTGCAAGACCGGGACAATGTTTGTGCGCCACGCGGAAGACATCATCGCGGATATCTCCGTGATGGGCGAAGTTTCCGCCAAAAAGTGA
16507	c_000000004158	2884	3271	r			TTGCCCACTGAAGAGTGCTTCCTGCTGCGCGACAAGACCAAGCTGGCAAATTTCTTCCCGCCCCAGGGGGTGCAGGTGCCCAAAACGGTCTTGCTGACCAGCATTTCACAGCTTAGCGGGCTGCAGGACGAGATTGCCTATCCCCTGATCATCAAAGGCAGATACTACGAGGCTTACAAGGCCTCAAACTGGGAAGAGGCGGTCAAGCACTTCCATTCCATCCAGCAACGCTGGGGTCTCCCCCTGCTGGCGCAAAAGATAGTGCCCGGAGACGAGTATAACATCGTCATCGTGGGCGACGGCGACGGAGGGATCATCGGCATGGTGCCTCAAAAGAAAACTGGTGATCACGGACAAGGGCAAAAGGCTTTGGCGGCGTGGTGGTGA
16508	c_000000004158	3260	3479	r			ATGGAAAGCGGCATCTATCTGGAAGGCCTGGTGGATCAGGTCTATCAGATGCCTTATCCCTCGGCTGGCGCGGACGCCTTCCTGACCAGGCTGGACCATATCCTGGAGCAGACGCCGCTGGATGTGATCATCCCCACCCTGGACGCCGAGGTGATCCTCTATATCCGCCTGGCTGACGAACTCAAGCGGCGCGGGATCAACACCTTTTTTGCCCACTGA
16509	c_000000004158	3638	3902	r	Coenzyme PQQ synthesis protein D (PqqD)	PF05402	ATGCGGAGAGACCACATGAACACAGAGAAACTCTCAAACCTGGCCATGAACGACAACGGGTTCATCTTTGACCCGGAATCCGGCTACAGCTATACAGCCAACGAGACAGGCATGTTTATCCTGAAACGCATGGCGGAAGGAATGCAGCGGCAGGATATCTTCAAGGAACTCAGCGAAGTCTATGATGTGTCCGAAGACAACTTTAACAGCGACTTCGACCATTATATGCTGATGCTGGAAGCATTGGACATGATCAAGCTTTGA
17760	c_000000004464	117	555	r	Hsp20/alpha crystallin family	PF00011	ATGAAGATTATACCTTATCGCAAACTAAACGAACTGAGACCCATGGGAAACATGCTCAGCTTTTTCGATGACTTCTTCAACCGCACGTTCGAAGAAGAGGGCGGGGATGACAGTTTCCGTTCCATGGCTTTGGATATAGTTGAGCACGAGAAGGAATTCGAGATTCTGGCCAATCTGCCGGGATTCCGCAAGGAAAACGTGAAGATTTCGGTACACGACAATCAGCTCTTGCTGGAAGCCAAGTGCGAGGATAAAAAGGAAGAGCAGAAAGGAACCGTCTACCGTTGTGAGAGATATAGCGGCAGCTACCGCAGAAACCTGCTCTTGCCGGAAAACTCCGACCTCGCAAAGATCTCTGCCAAGATGGAGGACGGCGTGCTGCGTCTGGTCATTCCCAAG…
17761	c_000000004464	683	1424	r	FlgD Ig-like domain	PF13860	ATGGATCATCCGACATCCTCATATCAATTGAGTGAGTTGCAGCCCTATCAAAACTACTATTGGAGAGTGTGCAGCATCTCGGAGTTGGGGATTGGCCCCTTCTGCCAGACCATGAGCTTCACGACGGGCAATATCACGGATTTGCCAGCTCCGCCGCAATTGGTCTTTCCGAGCGATCTGGCCACCGGCTTGCCCCTGGAGATCACTTTCAACTGGGAACCCCAATCCCTGGCAGACAGCTATGCCATCCAAGTTACCCGCGACCCCTGGTTTGCCAGCGTGGATCACTACATTCAGGGCATCGGCGGAACTTCCGTGACTGTGAGCAGTCTCAATTATAATACCAACTATTTCTGGAGGGTCAGCTCCTCCAACGTTGCCGGCAGCAGCCTGTTCTCA…
17762	c_000000004464	1389	2532	r			GTGAACGCGATGATCAACGGCAAGCGGGTGTGGGACTTTAACTTCCAGATAGAGACCTCCACTCTTGCCTCCGGCGCGGGAGTGCTTTCGCATGAGATGTTCCACAGTCTGGGAGCCCCGGATTTGTATCGCTACAACGACAACACGATCGACCCCATCGGAGCCTGGGACCTGATGTGCTCCGACCAGAATCCGCCCCAGCACATGAGTGTCTGGATGAAATACCGCTACGGCCAGTGGCTGACCGAAGTTCCGGAGATCACCCAGTCGGGAACCTACACCCTGTCGCCTGTGGCAAGTTCTGCAACCAACAACATTTACCGCGTCCCCTCCTGGCGCAACGGGGAATACTACCTGCTGGAATACCGCAAGGCCTCAGCCAACTATGACCACAACATC…
17910	c_000000004499	2	980	r	Bacterial Peptidase A24 N-terminal domain	PF06750	ATGGAGACGACAATGAAAAAGACAGCTATGCTACTGGCTATTGGGATCATGGCAGTGATTCCTTTGACCGCTCAGATAGACCTGCCCAGGCCGAATCTCAATCCTTGGCAGACCGCCTCGAGAAACCCCCTCTTTGATGCCAGCCGGCTTTCCATGAACCACTCGATGGGTTTCATGGCTGGCAGTTCCAGCGCTGGCTATGGCTATTATCTTTCTAACTACACCAACCACCTCAAGTATGAGCTGAGCCCCAAGCTCGACCTTGCCTTGGATCTGAACTTTGTTAATTACGGCTCCACCGCGGGCGGGTTCAAGTTCAACTCCGACAATCAAAGCAAGGTTATTCCGGAATTCAAGCTCAATTACCGGCCTTCGGATAGCTTCCGCGTTTCTGTGGAA…
17911	c_000000004499	1115	1679	r			ATGGTCAACAGGCTTGTTCACACTAAGGATTTGGATGGCGAACAGATAAATATTGACCGTTTGCTGACAAACATAGAACAGGTTTACCAGTATCGCTCAATCCATGACCCCCGGGTTTATAAAGACGATAACATGAAGCGTTTGATCATGAACTACGGTTCCGGCTTTGTCCGCGCGGCAGTTTATTATACCAAGCAGGGAGATTATGCCAAAGCTGAAAAATACGCCGCAGAAGCAAGAAGATATGTGGACACCGAACTGAGGATGGCTGACTACTACATACGCTACTATGTGGACACCAACCAATTGGCAAAACTCGATGCGTTCATCGAAAAGAATATCTTTCCCCATGAACGCGCCATCGATATCTATCAAGGCTATGTCCTGCGTTATATCCTG…
17912	c_000000004499	1630	2830	r			ATGGTGCGTGCTGCGGATAGGCCTTTCATCAACGAAGGGCACCCCAGCACCATCCAGATGTTCCAAGATTATGTGCTGAGAAAGCAATACGGCGTCACCTCCATGTTTGAGCGCAGGGGAAACCTGATCACCCATCAGCTTGGCTATCATTTTTTACGCTATTTCGGCTGGCAATGGTTCAATGCGGAAACTCTGGCAAGATGGTTCAAGATACCTGCCGCGGCGGTTGCGGCCATAGCTAACATTTTCATCGCCGTCACCGGTTTCTTTGGCGCGATTTTCCATGCCCGGAAGAACAAACACAGCTTCTTCTATTTTCTCTCGATATTTTTCTGTACCACATTGCTGATGGTCTTTGTGATGAACTTGTCTTCTGGCGAGGTCAGGGACCGCGATTAC…
17913	c_000000004499	2810	3830	r	Protein of unknown function (DUF2723)	PF11028	ATGGCTAAAACCAAACGAGATTTGAAAAGAATAAAACAACAGTTGCAGAAAAGCGGATCAAGTCCACGCGAGAAAACTCCTTACAAGGTTCCCGAAACCACTGCGCGCGGCAGCATCCGCGATTTTAACGACGCGGATATACGGCCCCAGCAGCTCGTTCCCAAACGTCTGAATATTTGGGTCGCAATAGCCGTGTTTGCAGTAACTCTGATTGTCTATATGCTCACCCAAGCCCGCACGCTGTCTTTCTGGGATTCCGGCGAGTATGCCACCTGCACCAGCATCCTGGGCGTACCCCACCCTCCGGGAAACCCCTTCTATATAATTCTGGGTAGGGCTCTCATTGCCATGTTCGGAGGGATTTTCTCACATGCCATGATAGCTGCTTTCATGTCGGGT…
17914	c_000000004499	3848	4835	r	Binding-protein-dependent transport system inner membrane component	PF00528	ATGAACGAAAAGCTGAGAATGACCTTGATCTACTTTCTGCTCGCAGTCTTCGGTTTGACCATGATTGTGCCGTTCATCTGGATGTTGTCCACTGCACTGATGACCCAGTCTGAATTCAATAAAAACGAATCTGTGTTCATTCCCAAGGAAGAATACTACGTCTGGAATAAAGGAAAAGAACAGCAAAGAATAATCCTGGTTACCACCAAAGCGGACAGCAGCATCATTCACGTATTGGACAAGGATGCCAACATAGTCCGAGAATACCTTGCCGTGCCTTCAAATCAGATCGAATTGATTAAAAAGAAACCCAGCCTGCACTTCGACAATTTCGTCACAGCATTCCGCAAGGTTCCCTTTGCCACATACTTTGCCAACACCATTTACGTTTCGTTCATG…
17915	c_000000004499	4845	5766	r	Binding-protein-dependent transport system inner membrane component	PF00528	ATGGAAGATTTCGCCCTACCTGTATATATTGCCGGCGTTGGTGCTGTTGGTGATGTTCAGATTGCTGCCGATCCTGATGTCCTTCGGGCTCAGTTTTTTGATCTGGATATCAAAGGGAACGGCGTGTTCATCGGTCTGGCCAATTACGCTGAGATACTGAAGGATCAGGTTTTCTGGCAATCGATGCTCAACACGATGTGGCTGATTCTTTTTGTGGTACCCATGAGCATTGTCTTCCCTTTGTTTTTTGCGGTCATGCTCAATCAGATCAAGTGGCTCAAAAGCTTCTTCCGTATCATTTATTTCATGCCTTTCGTCACTTCACTGGTTGCGGTTTCCATTGTCTGGAAGATAATCTTTTCCGAACAAGCGGGCCTGGCCAATAACTTTTTGGAGTGG…
17916	c_000000004499	5807	7004	r	Aminotransferase class I and II	PF00155	ATGAAGCTATCATCCCGTGCCTTAGAAATACAGGCCTCCCCCATCAGAAAACTAATGCCTCACGCTATAGCGGCCAAGAAGAGAGGCATCAAAGTATACCATCTGAATATCGGACAACCAGATATCCCCACCCCTCAACCCATGCTTGAAGCCTATCACAATTTTTCTGACAAGGTTTTAGCCTATGGTCCTTCCCAAGGGCTCGACATATACAGGCAAGGCCTTGTTCAATACTATCTCAAGAATGGCATAGCTTTGAAAGAAAGCGATATCATCGTGACCACAGCAGGTTCAGAAGCAGTTACTTTTGCCATGATGGTTGTCTGTGGTGCTGGGGATGAGATTATCGTTCCCGAACCTTTTTATACCAACTACAACGGTTTTGCCACAATGGCGGGA…
17917	c_000000004499	7108	7330	r			ATGCAAGCGCCAATAAACAGATACACAATAGGATACACGCCATATCAGGCTGATTGGTCCATCGACACCATCAAAGCACGTATCGAACAAGGCATAGCAAACAAAGAAACTCTCATTGTCATTGGTTTTCACCAGATAGAAACACCCTCCAGCCATATGAATTGCCCTATATCTGTGTTTGAGACCATTTTGGATTTTGTGTACCAAAAAAAAAAGGCCTGA
18031	c_000000004528	1	3484	f	Peptidase family C25	PF01364	AAAGTCCAGGGTGACAACTATGTGATCAAGCTCGATGGCGGCCAGGCCTTGGGTGAACCCGGAGCCCCCAACCTGCCCTGGATCGGATCAAAGCTGCTCCTGCCAAGTGGCGAGGAAGCGGTGGAAATCCAAATCAAGAAAATGAATCCAAGCACCTATCAGCTTGATAAGCCCATCATCCACTTGCAGCCCCAATACCCTTTATCACAGACCGACCTGCCTCAACCCGTGACGGCGGATCAGGCTATTTATGGCAGCGCCCAAGCATATCCCGTTCAAGACAACAATGGAGCTAACACCCAGTTTCTCTGTGGACACCCCATCAATTTCACGGCTTTCTGTCCATTTGAATACTATCCCCAGGAAGGATTACTCAAATTCTACCAAACAGTTTCTGTG…
18032	c_000000004528	3500	4208	f	Sir2 family	PF02146	ATGATTAAGATTACAAAAGATACCCGGCTGGTGATTCTGACTGGAGCAGGCATCAGCGCAGAATCGGGCTTGCGCACCTTTCGCGACAGCGGCGGTTTGTGGGAGGATCAAAGGGTGGAAGATGTAGCCACCCCGGAAGGCTTTGCCAGAGACCCCAAACTGGTCTGGAGATTCTATAAAATCCGTTACAGAGAGGCAATTGACGCGCAACCCAACGCAGGTCATACCGCCTTGGTGAAACTGGAAAGATTTCTGGACAAAAATTTCTGTCTGATCACCCAGAATGTGGATGGCCTTCATACCAAGGCAGGCAGCACGGGAGTATTGGAAATGCATGGTTCTTTGTTTGAATGCTACTGTACTAAATGTCGGACAATATACCGCACGGCAGAGATTGAC…
18033	c_000000004528	4275	5223	r	Amino acid kinase family	PF00696	ATGAAGAAGACAGCAGTATTGGCTTTGGGTGGCAACGCCATCATCAAAGCGGGCGAGAAAGGTACCATTACCCAGCAGTTTGCCAATACCAGAGACTCTCTGGGCGGGATTGTGGAACTAATCAGCCAGGGCTACAGGCTTGCAATTACGCATGGAAACGGTCCCCAGGTGGGGAATCTGCTTAGACAGCAGGAAGCGGGTGAAAAAGAAGGCCTGGCTCCCCTGCCTCTGGGTGTGTTGAACGCTGCCACGGAAGGGACAATGGGCTATATGATCGAACAAAGCCTGCAAAACAAACTCCAATTGCATGGCATCGACAAGCAGGTTATCACCCTGATATCCCAGGTTGTGGTTGACCGTAACGACCCCAGTATGCTCAATCCCACTAAATACGTAGGC…
18699	c_000000004692	2	629	r	SOS response associated peptidase (SRAP)	PF02586	ATGTGCGGAAGATTTGCCCAGGTGATCAAGCACGACCAGTTGCAAAAACTGGCCAAAGAGCTGCGCCTCAACCGGGAGAGCCAGCAGCTGGAGTTCAATTACAACCTCGCGCCCACCCAGCCCGCGATGGCGGTGGTGAGCCAGGCCGCGGGGCGTTATCTGGGTGTTTTCCGCTGGGGTCTGATCCCCTCCTGGAGCAGGGAGATACCTCCCTTCCCGCTGATCAACGTGAGGGCGGAGACCATCACCGCCAAGCCCAGCTTCCGGGGAGGCCTGCAACGCCGCCGCTGCCTCGTGCCTGCCACGGGGTTCTATGAATGGAGGCAAAGCGACAAGCAGCCCTTCTTCATCCACGCCGCCCAGGGGGATTTGCTCTGGATGGCGGCCATCTACGACTCC…
18700	c_000000004692	717	987	f			ATGGCAAAATTCGACATCGACGCGGTGATGAAAGAGCTGGAAAAGCACTTCCACAGCGTGCAGACCCCCATCGTTGACCTGATCCAGATTCAGACCAAAGACCCCTTCAAGGTGCTGGTTGCCACCATCCTCAGCGCCCGCACCAAGGACCAGACCACAGCCAAAGCGTCGGAAGCGCTGTTTCAGGTGGTGCAGACTCCGGATGACCTGGAAAAACTCAGTGCCGCCAAAACTGAACGGCCTGATCCGCCAGGTGGGTTTCCACAATGA
18701	c_000000004692	1047	1365	f	Helix-hairpin-helix motif	PF00633	GTGCCCTCTGAAATAGATGATCTTCTGCAGCTTCCCGGGGTGGGACGCAAGACCGCCAACCTGGTGCGCGCGGTGGCTTTTGGACTGCCCGCCATCTGCGTGGATGTGCACGTGCACCGCATCAGCAACCGCTGGGGCTACATCCGCACCAAGACCCCGCTGGAGAGCGAGATGGCTCTGAGGAAGATCCTGCCCGACCGGCACTGGCTGAATTACAACTCTTTTCTGGTGGCCTTCGGGCAAAACCTCTGCACCCCCCGCAAGCCCCGCTGCGCCGAGTGTCCGATCCACCAATACTGCAAGCGCGTGGGGGTCTGA
18702	c_000000004692	1458	1902	f			ATGGACCAGAACAACCCCAACTTTGGCATGCAACCGGTAGCCCCGGTGATGACTGTGGGCAATTGGGTGGTTACCTTTCTGGTGATGCTGATTCCCGTCGTCAATATAGTAATGTTGATTGTGTGGGCGGCGGGGCAGCAGCGGCAATCCCAACCGCAAAACCTGGGCGATCACAATTCTGATTTTCTGGGCTATCCTCATCGTTATCTGGATAGCATGGCTGCTTCTCTTTGGGGGCACCATGCTGGGGATGATGAGTGCCCTAACCTGACACCAACCGCTATTACCACTATTATTCCAGGACCGGCCTATCAACGCCGGTTCTTTTTTTTGGCCTCCGCGGCAGGGGGATGGATGGGCTTCAGCCGGACGCGGGCTTGCCCAAAGCTTCCCAGGCGC…
18703	c_000000004692	1819	2443	r	RecX family	PF02631	ATGCGGCTGAGGATAAATCCGAAGAATAAACTCGCGGTTATAATCGAAATAGACGGCGTGAATCAGGGCACCCTTCCCAGAAGGGTGCTCCCGCCGCGCTTTCCGGAAGGTTTCGCGGGAGAGGCAGACAAGGAAGAGACCGGAGAACTGCTGGAACTGCTACGCGCCAGGGCTTTCAATCTGCTGCTGGACTGGCTCGCCAAGTCCGAACACAGCACCCTGCAATGCCGCGCCTATCTGAAACGGCACCTCTTTCATCCCAGCCTGGCGGAAGAAGCCATCGAACGCCTGAGGCAGCTAAACTATCTGAGCGACGAACGCTTCGCGGAAACCCTCATCCGCTCCTATGCCAACCGCCGCGCCAGCCGCCGCGCGATAATCGCCAAACTGCGTGAACAG…
18704	c_000000004692	2414	2552	r			ATGGAAAAGACCAAGCAGTACCTCAAGGATACACCCGATCTGCTGCAGGAGATCGAAGAAAAGGTGCGCGCCAAGGCGATTCCCGAAACTATGAATTCTGTGGACACCGATGCGGCTGAGGATAAATCCGAAGAATAA
18705	c_000000004692	2574	2982	r	recA bacterial DNA recombination protein	PF00154	CACGTGGGATTGCAGGCGCGCCTGATGAGCCAGGCCCTGCGCAAACTCACCGCCATCGTATCCAAATCCAACACCGCCGTGGTGTTCATCAACCAGATCCGCATGAAGATCGGCGTCACCTCCTATATGAACCCCGAAACCACCACCGGCGCGTGGGCTCTCAAGTTTTACGCCACGGTGCGCATGGAAGTGCGTTATGCCGGCGCCATCCGCTATGGCAGCGCGGATTCCGACATCATCGGCGCCAAGACCCGGGTGAAGATCGTCAAAAACAAGCTCGCCCCGCCTTTCAGGACAGTCTATTTCCCCATTATCTTTGGCGAAGGCATCTCCAACATCGATATCATCATCGAGACGGGCATCGAGATGGGGCTGATCAAAAAAGAGCGGCTCCTGGTT…
18842	c_000000004732	286	436	r			ATGCCAGGCAAGATGGGCAAGAGATTTGCGGTTGATTTCGATATTGGCTTTGTGCAGTCCATTGATGAACTTGCTGTAGGACATGTTATTGAGCCGGCACGCGGCATTGATGCGTGTAATCCACAGACTGCGGAACTGACGCTTTTTTAG
18843	c_000000004732	548	1580	f	tRNA synthetases class II core domain (F)	PF01409	GTGCAAAACCAGTTGAATGATGTCCTGACGCAAGCCCGGTCTGAGATTGGCGCTTGTAAAAGCCCAAACGATCTCAACAATGCAAAAGCCCGCTATCTCGGTAAAAAAAGCCTGCTCAACGAACTCTATGCCAGGCTCAAAGAGCTGGCAGCAGAGGATAGGCCAGCTTTTGGGCAGATGATCAACGATGCCAGGAAAGAACTTGAATCGCTCATTGCCCAAAAAGAGCAAGATATTAAAAAGGCCAGTTGGAGCCGCCATGCCCAGGCCCAGGACGAAGACCTGAGCCTGCCGGGGATATTCAATCCGGTTGGGGCCTTGCACCCGCTGACAATCGTCAGAAGGCAGATTGAAGACATCTTCATGAGCATGGGTTTTGAAATTGCCGACGGACCCGAT…
18844	c_000000004732	1579	3061	f	B3/4 domain	PF03483	ATGAAAATCTCCTGTAATTGGCTGGGTAAATACATTTCTCTTCCGAACGATGTGGACACCTTGATTAGCACCCTCACCTTTTCCGGTATTGAGGTGGAGGCTGTCCAGCAGATGTCAGCGCTGCCGGAGTCCGTTCGCACCGCGAGGATTGTCAGTTCAGAGCTGATACATGGTTCAGACCATCTTCATGTTTGCCAGGTGGATGACGCTTCAGGCTCAACAATCCAGGTTGTCTGCGGCGCCCCGAACTGCCGGGCTGGCATGATTAGCGTGTTGGCAGGCGTGGGCAGCACTTTTAACGGTATCGCGATCAATAAAGCGAAACTCCGTGGAGTGGAGTCCTATGGCATGCTCTGTTCTGAAAAAGAACTGGGAATTTCCGACAATCATACCGGCATA…
18973	c_000000004765	2	1457	r	Bacterial capsule synthesis protein PGA_cap	PF09587	ATGGAACCAGGCAGAAAACCCGTCATTCGCACCTTGCTGATTTCGCTTGGGGTGTTGTCGCTCATGCCACAGATCGTGTTTGCGGATTTGAGATATGACATCATCGAGGATTTTGAAAGCGGCTCTGTGAACCTGGTATCCTGGGAAGATGAAGACCTGAACCCCAATTCCTGGCAATTGACCAGTTCGGGCACCCACGACGGAAGCGCCTGGTCCCTTCATCTCTATGGTAACACTTGGAAACAACAGTTTATAAACCCGGTGTTGGTGGATTCGGGAGCGGTATTCCAAGTCGCCGCCAAAACCGCCAACGGCGCTAAAATCCAGGGTATCGGTTTCAGCGACGGCATTAATGAGCTTTTTTACTCGTTCTCCGGTTCGCGCGTCCTGGATCTCGAA…
18974	c_000000004765	1527	2094	r	Pyruvate ferredoxin/flavodoxin oxidoreductase	PF01558	ATGAAGAAAGATATAATCCTGGGCGGTGTGGGCGGACAAGGCATCCTGACCATCGCGACGATTATTGGCGCGGCAGCCCTCAAACGCGGCTGGAACCTCAAGCAGGCCGAGGTGCACGGCATGAGCCAGCGGGGCGGGGACGTGCAATCCCATTTGCGCCTTTCCGACAGCCCGATCTGGAGCGACCTGATCCCCTTTGGCCAGGCGGACATGATCCTGGCCGTGGAACCGATGGAAGCTTTGCGCTATCTGCCCTATCTGTCTTCCGACGGTTGGCTGATCGCGAACAAAACTCCCTTCAAGAACATCCCCACCTATCCCGATGAGGAAAAGATATACGCGGAGATAAAGAAACATGCCAACCATGTGTTGATTGACGCGGACGCCATCGCCAAAGAG…
18975	c_000000004765	2090	2633	r	Thiamine pyrophosphate enzyme, C-terminal TPP binding domain	PF02775	GTGGGATGCCCCCATGCCGACAGCTTCCTGGCTCTGAGCGAAGCCCTCAAGGAATACGGAAGGGGACACGTTTTCAGCGACATCGGCTGCTACACCCTTGGTTTCATGCCCCCCTACAACGCCATCAATTCCTGCGTGGATATGGGAGCCAGCATCACCATGGCTAAAGGCGCCTCGGACGCCGGCCTGTATCCCGCCGTCGCCGTGATCGGTGACTCCACCTTCTCCCACTCTGGCATGACCGGCCTCCTGGATTGCATCTACGAAAACGCCAATGTCGTGATCGTGATTTTGGACAACTCCACCACAGGCATGACCGGAGGACAGGACTACACCGCCTTTGGCAAGCTGGAAGACATCTGCGCCGGCCTGGGCGTTGCCAGAGAACACATCAGGGTG…
18976	c_000000004765	3071	3698	r	Pyruvate flavodoxin/ferredoxin oxidoreductase, thiamine diP-bdg	PF01855	ATGGAAAACATGATGTTACTGGGCGACGAAGCCTTGGCACAGGGCGCTCTGGACGCGGGAATCTCTGGATTCTACGGTTATCCGGGCACACCTTCCACCGAGATCATCGAATACGCCCAGCGCAGCAAACAAGCGGAAGCAAACAATGTCCACCGCACCTGGTCTTCCAATGAAAAGACCGCGCTGGAAACAGCCATCGGAATGAGTTACACCGGAAAACGGGCGCTGGTAACAATGAAACACGTGGGTCTGAACGTCGCGGCAGACCCCTTTATGAACTCAGCCTTCACAGGCGCGAACGGCGGTCTGCTGGTTGTGGTGGCGGATGACCCCAGCATGCACTCATCGCAGAACGAGCAGGATTCCCGTTTTTACGGCAGGTTTGCCATGATCCCGGTA…
19186	c_000000004816	0	1722	r	tRNA synthetases class II (A)	PF01411	TTGGGGATTATTACAAAAAAAGAGGCCATAGAATGGGCATGGGAACTGCTCACCGAAGTCTGGAAGCTACCCAAAGACAAGCTATATGCCACCGTCCACGATTCCGACCAGGAAGCCTATGAACTGTGGAAAAAACAGACGGATATCGATCCGGAACGTATTTCTTTTCACGGCGACAAAGACAATTTTTGGGAAATGGGGGAGACCGGGCCCTGCGGGCCTTGCAGCGAAATCCATATTGACAGGGGCGAAGCTTTCTGCAGCAGAAAAGGCGTTGAAGGCCACGTCTGCGCGGTGAATGGAGATTGTGGACGCTACATCGAGCTTTGGAACCTGGTTTTCATCCAGTACAACCGGGAAAAAGACCGCTCACTGACACCCCTGAAACACAAGTATGTG…
19187	c_000000004816	1691	2015	r	tRNA synthetases class II (A)	PF01411	GTGTTTAGCAGCAAAGATATCCGTCAGAGTTTTCTGGACTTCTTCCAGGCCAGAGGCCATACATTTATAGCTTCCTCGCCGGTGGTTCCGGAGGGGGATCCAACCCTGCTGTTTACCAACGCGGGAATGAACCAGTTTAAAAACATCTTCCTCGGCTTGCATGAGCCATCCGTGCCGCGGGCAGTAAACAGCCAGAAATGCATCCGCGCTGGCGGCAAGCACAATGATCTGGAAGAGGTCGGCAAAGACGGTTACCATCACACCTTCTTTGAAAATGTTGGGCAATTGGTCTTTTGGGGATTATTACAAAAAAAGAGGCCATAG
19188	c_000000004816	2019	2961	r	Pyridine nucleotide-disulphide oxidoreductase	PF07992	ATGAATTATGACGTGGTGATAATCGGAGGCGGGCCAGCTGGCCTTAGCGCGGCAATTTATAGCGCCAGAGGCGGCTTGAAGACCGCGGTGATAGAAAAGGCGCTGGTCGGCGGACAGATCAACGTGACCGATGAAGTGGAGAATTATCCTGGCTTTGAAGAGCCGCTTTCCGGCTTTGACCTCACCGACCGCATGAGAAAACAAGCAGAGCGTTTCAAGGCGCAATTCATAGATGAAGAGGTGACCTCCATCGCTATGGACGGGCTTTACAAAATCGTGGAAACCAGTGACAACAAGTATCGCGCTAAAAGCCTGATCATCTGCACAGGCGCCCATCCGCGCAAACTGGATGTTCCCGGCGAAGACGAATTCACAGGCCGGGGCGTGTCCTATTGCGCA…
19189	c_000000004816	3169	3724	r	FlgD Ig-like domain	PF13860	TTGGAATGGGGTGTAAACAACCTTGTCGGAACAGATCCACTGTTCAGCGGCAGTGATCCAGCCCTGCCGTGTTCTTATTATCTGTATGCCGATGCTGTAAATGGTTTCTCGCCAGCCATAGACGCCGGGACAATGGATTCCGCGATCTTGCCTGCGGGCTACGTTATTCCTGAATATGACGCTTTCGGTTTCAACCGGGTTTATGGGTCCGGGATCGATATTGGCTGTTTCGAATCCCAAGGCCATACCGGAAATGAAGATGTGATCAATCCCCCCGCGAACGCCCTGCAACTGGCAAACTATCCCAATCCCTTCAACCCCAGCACCACAATCAGCTACAGCATTCCCGCCGATGGCAATGTAAACGTCAGCATCTACAACGTTAAAGGTCAGTTGGTA…
19190	c_000000004816	3708	4404	r			TTTTCCTGGGACGTGTTTGATTCCCTGATCGAGAATGTCTGCATCGAAAACAGCACGGTGGAGCATGCCATGGTCTTTTTCGGGTTGGGTGAGAGTACATACACCATGCGTAATCTGACCATGCGCAACAACTGCAGCACCTGTTCAGATTTCGGTTTGAGGATAGCCGGACGCATAATCACTCTGGACAACATCGTTATGACCGATAACCAGACCCTGGGACTACCGGAAGAAAACGATCAGGAAGGCGGGGCTTTTGACATTGATGTTACAGAGAAACTGACGATCCGCAACAGCAAGTTCGTGAACAATACACACTATTCTGTGGACGGATGGGCGAACTTTCGAATAATGGGCTGGAGCATGGAGGGTAACGAATTTGGTGGGATAGTGGATATT…
19443	c_000000004889	2	410	f	ABC transporter	PF00005	AACGCCCTCATCCCGGTACGGGTAAGAAATGGCGACCTCAAAACCGCCCTTGGGAAGCTCCATCAGCTTTTGCCTGTCTTTGGCTTGCAGGATCACGCCAAACACCTGCCCTACCAGCTTTCGGGAGGCTTGCGCCAAAGGACGGCTCTGCTTAGGACCTGCATGATGGAAACCCCGCTGTTACTGCTCGACGAGCCCTTCGCCAATCTGGATGCCATCACACGGCTACAGTTGCAGGAATGGCTTAGTGAGATAACCCGGGAGCTGAAGCTCACCGTTATACTTGTGACCCACGACATCGATGAAGCGATCAGGCTCTCGGATGAAATTCACCTGATGCAGGGACAACCGGGTAACTTTGTGAAGCGATTTGAGCTGAAGAGGAGACCAAGGCGGACG…
19444	c_000000004889	470	1301	r	PPIC-type PPIASE domain	PF00639	ATGCATATAGTTGCCAAAGTTTTCGATTTGGCTATCACAGATAGCGAGATACAAAAAGAAACCCATAAACTAAGCGGGATAGACAGCCCTCGGGAACGCAAAAACGCTCTCAACAGGTTGATCGACAGATACCTGCTTTTGCATCAGGCTTTGACGACAGGTTTGTCCGTATCTGATTCCGAATTTGACGACGCACTGTTTGAATCCCTGGAAGAAATGGACAACGCTCCGAGAGACATGGAGCAGACCCGCAACCTTGAAGAGCAGACCCGCCGCAGAGTCATCATCCGCAAATACGTGCACAATTATTGCTTCAAGAGTATTGAGATATCCGAACAGCAACTGCTTAATTTTTATGAGGATCAGAAAGAGGTTTTTGTAATTCCAGAAACCGTGCAC…
19445	c_000000004889	1325	2240	r	IPP transferase	PF01715	ATGATCCCGCTGATCGTCATCGAGGGGCCCACCGCCTCGGGCAAGACGGCATTGGCTATCGAGCTGGCGCGGCGTCTGGACACCGAGATCATCTCGGCTGATTCCCGGCAGGTTTACCGGCACATGGATATCGGGACAGCCAAACCCAGCAGTAGCGAACTGGAGGCGGTTCCGCATCACCTCATATCAATCATCGAACCATCGCAAAGCTATAATGTGGGCTTGTTTTGCGAGGACGCGGGGAAGGTGGTGGAACGCTTGCACTCCCAGGGTAGGATTCCACTTGTCTGCGGAGGGACAGGAATGTATGTTGCTGGCTTGCTGAAAGGTATCTTTCCCCAGCCTGAGATTCCTGCCCAAATCAGGCACAACATCAGGCAAAGAATGGCAGCAGATGGT…
19446	c_000000004889	2236	4126	r	MutL C terminal dimerisation domain	PF08676	ATGAAAGCGATCCATATTCTGGCCGATGACGTACGCAACAAAATAGCCGCAGGCGAGGTGATCGAAAGGCCGGCCTCGGTGGTGAAGGAACTGGTGGAAAACGCCATCGATGCAGGAGCCACGCAGATTGCGGTGGCTGTGGAAAACGGTGGCAAGGACCTTATCCAGGTGAGCGACAACGGAAGCGGCATGAGCCCGGACGACGCCCTGCTGGCATTTGAACGGCATGCCACCAGCAAGATCCGCACGGTGGACGATATAGTTCACATCGGTAGCCTGGGATTCAGGGGAGAGGCGCTGCCCAGCGTTGCCAGCGTAAGCAAGCTGAGCCTGATCACCCGCAGGGCTGAGGAACCGGTGGCCACTCAGGTGGATTACAGTTTTGGCCGCTTGGTGAAT…
19447	c_000000004889	4127	5789	r	Phosphoribulokinase / Uridine kinase family	PF00485	ATGATCATCGACCTTAGATTAGATGGTTTCAAGCACAGTCTGGTGGAGCTTGATAATCCCATGCCTATCAGTGAGATAGTGCGCGCTACTGACATCTCCACCAAGACCGTGTTGTCCTATAAAATCAATCATCGCCAATATGTCAATGACGAATATGTCCCAGCTCAGAATACCATGGTGGATTGCATCACTTACAAACATCCGGAAGGCAGCAGGATCTATCATGATTCTGTGATCTTTGTGATGGCCAAAGCGGCGTACAATATTCTGGGTGAGAACAACACTCTGGTGGTGGAACACTCGGTGGGCGACGGAGTGTTTTGCGAATTCTTTGGCGACCAGCTCTGGACCGCGGATGACTGCACGCGCTTGTTGGAGGAAATGCAGCGCATTGTGGAA…
19448	c_000000004889	5919	6870	f	Uncharacterised 5xTM membrane BCR, YitT family COG1284	PF02588	GTGAAGAGATTGAGTAAGAAGCAACTCCTGCTCAGGGAACTCCGCTATATCGGCGGGATTCTCATTGGAGCGGTATTTTTTGCCATCGGCTATTCTTGGTTTTTACTGCCCTACAACATGGCTCCGGGAGGTGTGGGAGGCTTGTCCCAGATCATCAACCGTTTAACAGGAATTCCAAACGGAATCAGCATGATTATGATCAACGTCCCCCTCTTCGTGATTAGCTTTATCTTCATCGGTAAGTCGTTTGGGGCCAAATCTATTTTTGGCATGCTGGTCTCCTCTTTGATGACGGACTTTATGCACCTCAAGGTTCTGGCCCGCCTGGGTTGGGTTGATCTTGCCAAACACACATTCGTGGTGGGTGGACACACCATCCATGCCTTCCTCGGTCCGGAG…
19449	c_000000004889	7118	8747	r	Ultra-violet resistance protein B	PF12344	ATGAGCCTGATGGAGCGGCGGGACGTGATCATCGTGGCATCCGTCTCCTGCATCTACGGGCTTGGCGTGCCCGAGGAATACCGGGAAGCGTTGATCAGGCTGGAAGTGGGTATGGAAATGGATCGCGACAGCCTGCTCCAAAAGCTCGTGACAGCCCATTACAGCCGCAATGACATTGCCTTTGAACGGGGAGCGTTCCGCGTGCGGGGTGACATTGTGGATATCTATCCCGCTTATCTGGAACATTGCCTGCGGGTGGAGTTTTTCGGCGACGAAATCGTGAGCCTGGAAAAGCTGCATCCCATCTCCTACCAGAGTCTGGGCAAGGTGGACAGCTATCCTGTGTATCCCGCCATCCACTTCATTATGAACGAAGACAAACTACGCGGCGCGCTGCAG…
19450	c_000000004889	8743	9124	r	Type III restriction enzyme, res subunit	PF04851	ATGGGAATTTTCAAACTCCACTCCAATTATGAGCCCAGCGGCGACCAGCCGGAAGCCATAGCTTCCCTGGTGGCTGGGATCAGGGAAAATAAACGCTTTCAGGTGTTGCTGGGAGTAACCGGCAGCGGCAAAACCTTCACCATTGCCAACACCATCGCTCAGTTCGACCGTCCGGTGCTGGTGCTTTCCCACAACAAGACCCTGGCCGCGCAACTTTATGGTGAGCTCAAGCAACTCTTTCCGGAAAACGCAGTGGAGTACTTTATCTCATATTACGACTATTATCAGCCGGAATCCTACATTCCCGGCAAAGATATCTACATCGAAAAGGACGCGGATATCAACGATGAAATCGAAAAGCTGCGCTGCGTGCCACCATGA
19451	c_000000004889	9351	9615	f			GTGGTGGATGTCCGCTACAAGGATTACGATGTGTGCCAGGACAGCCTCAAACTGGTCATTGCCAGAGTGGACTCCGACCGGGATGAGTTCTATCAGGATATGCTCAAACAATACACTTCCATCGAGTTCAAACCCAGCGAGATGTTTGAAGTCTGGACCGAGATCCTCAACCACAAGATCGTCACCAGCAAAGCCCTCAACCGGGATATTGCCATCAAGGTGGCAGCCCTGGATTATATCGAGACAGTTTATAAAGCCCGATGA
19452	c_000000004889	9611	9764	f			ATGATCGGCCAGATCCTGCTGATTATCAAGCCCAAAACTGTTGCCCACGGGCATGTAGGACACATCTTCTCCCTTATGGAAGAAGCGGGATCTCCGCTGCGCAAGGCGAGAGGCAGGTATAATATGGGATATCTACGCGAAAGGCATCACTGA
19453	c_000000004889	10184	11381	f	Outer membrane protein beta-barrel domain	PF13505	ATGAATCGCAAGTCCCTTGTTCTGTTGTTGATATCACTTGTCCTTGTGGCAAGTGGCTTATTCGCTACCGATAGCCGCATGACCGCATTGGGCTATCCCTATGGATTTATCCGGGATGACACAGATATCCACACTTTTCCCTCCACTATCTTCAGATACAATCGCAGCGTAAGCGGAGAGCTCCTAACAGCTGGTAATTCCTTGGATTGGACAATCGGCACCAATGTTCCATTAAAAGCCAATGTGCTGGGCTTTTACCTCAATCTGCCCACGCAAGTGGATTTAGACGGCCATATCAACTGGCCCGGTTTTGATCTCGATCTCAGCCGCAAGGTCCAGTTCTACTATGGCTTCAAGGATAAGTTCGCCCTTGGCTTCGGCATGGCGATCGACAGTGAA…
19454	c_000000004889	11491	12511	r	Malate/L-lactate dehydrogenase	PF02615	ATGATCGAAGTTTTTACCCGCATCGGAGTGCCTGCCGAAGACGCTGGCATCTGCGCCGATATACTGATTGCCAGTGACCTGCGCGGTATCGAATCACACGGCATCGGACGCCTCAAGATGTATTACGACCGCATCAAAGCGGGCATCCAGAAACCAGTCACCCAGATCGAGGTGATCCGCGACAAACACGCCACGGCAGTGTGGGACGGCAACCATGGCATGGGACACGTGATCGGTTTCAGGGCTATGAGCGAGGCCATCCGCAAGGCTTCCCAATACGGCCTGGGAGCGGTGGCAGTGAGAAACTCAACCCACTATGGCATCTGCGGCTACTACGCTGATATGGCCTGCCGGCAGAACATGCTGGGCCTCACTTTCACCAACGCCCGCCCCTCGATT…
19455	c_000000004889	12544	13759	r	Pyridoxal-dependent decarboxylase, pyridoxal binding domain	PF02784	ATGTATAGAGAGCCGTATCACTTTAATGTGAGCCGCTATATTGATCCGCAGCGTTTTGCCCGGATCAGGGATTTTGCCCGGGGTCTGGATTGCCCCATCCTGATCATCGACCTGGATGTCATCAAAAACAAGTATCTGGAATTGCAACAGAGCATGCCACTGGCTTCCATCTACTATGCAGTGAAGGCCAACCCCAACGACGAGGTACTCCGCCTTCTGCACGCTTTGGGATCAAACTTCGATGTGGCGTCTGTGTACGAATTGCGCCAGCTTCAGCGCTTGGGAGTGGAGCCGGAGAGGATGAGCTATGGCAACACCATCAAGAAAGCCAAGGACATTAAATACTTTTTTGAGCAGGGCATCAGGAAGTTTGTGACCGACAGCGAGCACGATCTGGAA…
19456	c_000000004889	13894	14665	r			CCCCAGATGCGCGAGCGGCAAAACCTCTTCCGCAAGGGTGTGAACCTGGCCACCCGAAAACTGCTCGCGGAGACCGCCCTGGCCACAGCCAAGGATATCCCCGCGGCATTGGACTGGTATAGCGATGCCAGACAGTTTTGCAACAACAAATTTGACCTGCAGGATTTGGATTTAGCGGTGGTTCGGCTGCTGATCATTCAACAGGATTATGACCGAGCCAGGCAGAAGCTACTGCAGGTGAGGGAGCCCAGGCACGGCGAGACCAGGGACTATCTGCTTTTTACCCTGGAACTGATGCGGGGAAATACCGAACTGGCAGACAGCCTGATGAACGATTATCTGATCGCGCATCCATCGGGTGTATTCGCCAATGACGCCATCTATCAGATGATGCTGGTG…
19571	c_000000004922	1	604	f	Tetrapyrrole (Corrin/Porphyrin) Methylases	PF00590	GACGTTGCAGTTGTAAGCGACGCGGGCAGCCCAGGTATCTCCGATCCCGCTCTTTTGTTTATTCAAAGCGCGATAGAAGCCGGCATCCAAATCGTTCCCCTGCCAGGCGCAACGGCGCTGATTCCCGCCCTGATCGCTTCCGGACTGGATACCAGCCTTTGGCAGTTTTGCGGTTTTGCCCCGCTCAAGGTCAAAGACCGCCGCGCTTTTCTGGAGCAAATCAAAGACTATCCCGGCAGCAGCGTGCTCTATGAATCCCCCCACAGGATCAGGCAGAGCCTGGAAGACCTGCTCGCCGCCTGCGGAGACCGCCAGGTTTGCATTGGCAGGGAGATCAGCAAACTGCATGAGGAATTCATCCGCGGGACTTTGAGCGCCATAGTTGCGGATTATCAGATC…
19572	c_000000004922	603	1251	f	Haloacid dehalogenase-like hydrolase	PF13419	ATGAAACCGTATCTGCTCTTCGATTTTGACGGCACCGTGGCTGATTCGATCGGGAAACTGTTTACAATGATCAACGAACTTGCTCCCCGCTACGGATATCAGCCCATCAGCGAGGAAACCTTTTCCCAACTTCGCAATCTCAACCTGCGGCAGTCTTTCAGGCATCTCAAAATCCCTTTATACAAGCTGGGACAGGCTATCCCTATCGTATTGCACGAGTATCGCAAGATCATCCCGGAACTGGATCCCTGCCCGGGTATCCTGCCAGTGCTTGAGACATTAAAAAAGCGGGGCATCCCCATGGCCTTGATCAGTTCCAATCAAACCGAAAACGTCCAGGAGTTCCTGGACCGGCAAGGGATAGATTGTTTTGCCTGGGTGGAGGGAACCGGCGGCATC…
19573	c_000000004922	1347	2466	f	Outer membrane protein Omp28	PF11551	ATGAAGAAGTCACTTTTCGTATTACTGACACTTCTTTGCTTGCTCAGCACAGTGCTGGCGGTTCCCCGCAACCTGGTTGTTGTGGAGGTTGCCACAGGAACCTGGTGCGGTTACTGCCCGGGTGCAGCCATGGGTTGCCATGACCTGTTGCAAAACGGCCATGCCGTGGCAATAATTAAGAATCATGGCAGCGACAGCTTTGCCAATACCTATTCCAACGCCCGTAACAGTTTTTACGGGATCTCAGGATTCCCCACAGCTGTCTTCGATGGCCAGAATCCCACTTCGGGCGGCAGCTCAAGCTCGTCCATGTACAGCAACTACCTGCCCAAGGTGAATTCCCGGCTAAACGTTCCATCTCACTTCCTGATTAGCGCCGTCGGAGCTCAAATCGGCAGC…
19574	c_000000004922	2446	3241	f	FlgD Ig-like domain	PF13860	GTGTTCACCGATGCGGATAGCGACACCGAGGGAAGCTCGATCTACAAATGGTACAGGATCGTAAATTCCTCACCGGTTCTGATCAATGGGGCCAATGAAATCAACTATACCCCAGTGGAAGCAGATATCGACCATGAACTGGTCTTTGAAGTTACCCCGGTTGATGAACACGACATGCCGGGAACACCTGTTTCCAGTGATCCCACACCCACGATAATCGATCTGCCCGCGCCCCAGAATCTGACCGGCACCCTCAATCTCCCGGACACCGTGGTGCTCACTTGGGAACCACCCCAATACTACGGTGGCAGAGGTTTTGTGGGTTATAGGCTATTCCGCAACGGACTGTCCATATCCACCCTTACCAACCCCAACACCCTGACCTTCACCGACACCTAT…
19575	c_000000004922	3371	5066	f	tRNA synthetases class I (E and Q), catalytic domain	PF00749	ATGGAAAATCCTACCACAGACAAAACCCCGGTTTCCAATTTTATACGGACCATCATCGACCGTGATTTGGAATCCGGAAAGCATAAAAGCATCAAGACCCGGTTTCCTCCCGAGCCCAATGGCTATCTGCATATCGGGCACGCCAAGTCCATCTGCCTGAATTTCGGTCTGGCGAGGGATTACGGCGGAATCTGCCACCTGCGTTTTGACGACACCAATCCCATCAAGGAAGATGTGGAATATGTGGATTCAATCATGGAAGATGTGCGCTGGCTGGGGTTTGACTGGCAGGACAAGCTTTTTTACGCCTCTGATTACTTCGATCAGTTGTACGAATATGCCGAAATCCTGATCAAAGAAGGCAAAGCCTATGTCTGCGACCTCTGCCAGGAGGAAATC…
19576	c_000000004922	5133	5994	r	tRNA_anti-like	PF12869	ATGAAAACAGTTGGCAGCGTCCTGGCGTTAATCGGCGGAATCCTGGTAATACTGCTTGGACTGGGAGCCTTGTTCAGCGACAATCTCCAGCAGGTCTGGCAGTTGGAATATACAAACACAAGCGGATTTGTTTCTTTGGCCACCATCCTGGCTTTGGCGATCATCATCCTGGCGGTGATCGCGTTAAACTTCCAACCCCGGATCATAGGCATTTTTATCCTCCTGGCTTCGTTTGCCGGAGTGATCTTTGGAGGCACCTTCGTGGATATCTGCATGATCCTGACCATCGTAGGCAGCTTTATCCTCATCACTTTACCCTCTGGCAAAGCGAATGAACAAGACGGCGGTTCCCGCATCTATCAGAAATGGTGGTTTTGGGTATTGCTGGGGCTGCTTTGC…
19666	c_000000004940	108	996	f	Predicted permease YjgP/YjgQ family	PF03739	ATGATTTCACCGACGGTCATGGATTACACGATATTCGCCAAAGAGAACAAGGATAACGTATTGCGTGATGTGCTGATCTATGACCGCAGCCAGACAAAGTATCCCCGCATCATAATGGCAAAAAGCGGCGAAGTGTTGCAAAAAGACAATGGCAACAGCCTGCAGATCGTGTTGCATGATGGTGAAATGCACGAACGAAACGAAAAAGAAAGCGGGAAATACCAGTTGCGGACTTTCAACAGCTTCACGGTCAATATCCGCAATCTCGCCGTAAACATGGATTATACCCAGGGAAGCTTCAGGTCTGACCGTGAGATGACATACAATCAGCTTGTGTCCTCCATCCAAGACAAGAAGCAGGAAATGGATGGCAAAGCACGCGAAATCTCCGCCTTGCAG…
19667	c_000000004940	1003	2122	f	Predicted permease YjgP/YjgQ family	PF03739	ATGAGAATACTTGACCGCTACATCACCAGAGAGTTTCTCAAAACCTATCTGATCATTTTCCTAAGCTTCGCGGTTGTTTTTATTGTCATAGATGTGATTGACAATCTTCCCCGCCTGATCAGATCAGGAGCGACAGTTAAGCTGGCTGCGCTTTACTATTTGCTGCGGCTTCCATATCTGATAGTGCTTACTTCGCCAGTTACAGTTCTGCTGACCGGACTGTTCATGATGAACTCCCTGTCCAAGCACAATGAAAGCGTTGCCATCCGAGCCGCCGGGGTCAGCATCAAAAGGGCGATGCTGCCCTTGTTTGTTATTGGCTTGCTTATCAGCGCGGCCATTGCCTTGATGGGAGAATACCTGCTGCCCAAGGCCGAATCTGCCAAAAGCTACGTTTAC…
19668	c_000000004940	2287	2911	f	SurA N-terminal domain	PF13623	GTGCTGGATGGAACCCTGTTCAGCGGCCAGTTCCTGGGCAAAGTGAACGGTACTAAGATCACTCCAAAGATGTACCAGCAAAAGATCCAGGAAATCACAACCCGTTATCAGCAACAGGGTCAGCCCATTGACGACAACATGCGCAAAAACATTGAGTATTCCGCTTGGGAAGAGCTCGTAAACACTATCTTGTGGGATCAGCAGATCAAAAAGAACAAGATCAAGATCAAGGAAAGCGACATCAAGACCGCAATCCTGAACGATCCTCCGCAGGAAGTTTTGCAAATACCAGACCTGCAAACCAATGGCCGCTTCGACAGATCGAAGTATGTAACCGCTCTCAACAACATTCCCGAGTTTCGCCAGCAAATGTATGAATACATGTCTGTGTATCTGCCC…
19669	c_000000004940	3021	3525	f	PPIC-type PPIASE domain	PF00639	ATGTATTCCGAAGATCCCGGTTCCGCGCGCAACGGCGGCTCTCTGGGCTCATTTGGCAAAGGCCAGATGGTGCCGGAATTTGAAAAAGCCGCTTTCGCCCTCAAACGAGGCGAAATTTCCAAACCGATCAGAACCGATTTCGGCTGGCATATCATCCGCTGCGACTCAATCCTCACCACCAATCCTGCCGAACCTAAAATCGTTGCCAGCCATATCCTGCTAAAAGTGGATGCCTCTGAGCGCACTAAAAATGATTTGCATGACAAAGCCGAACAGGCTCAAAAGCTGATTAAGAAAAAAGGCATCGACAAAGCTGCAGAAGCCTTGAAACTGGAAGTGGTGTCCAGCAATTGGCTTGCCCACGACAGAGAGGCTATGGATGGCATAGGTCAACTGCCC…
19749	c_000000004961	1	184	r			ATGATGACCAGAAAAGAGATTAGCTCGCTGTTGATCCTGCTGCTGGTGATATCCTATGGATTTTATAAATATGTCACCCGCTCCTACTCGGATATCCGCACCAATCAGGATTTGCTGAATACCTCGGTAACCATTGAAGCAAGCTCAAAAAGCAAGGGTATCGGCGCTCAGATCGACTCGGTT
19750	c_000000004961	193	991	r			ATGCGTTGTAAAAAATGCAACAGCACTCTTGCCCCCCACGACCTGTGGTGTTCAAGCTGTGGACGGCAAACACCTGCTGTGACGAGCGACCTGTCTGCCCTGGCGAGCCTTGCCAGAACCTGGAAAAGCTTCAAACAATACAAAGGCGGTAACGTCCCCGCGGCTGCCTTTTCCATTATCCTCGGGATAATCCCGGTGGCCGTGCTGATGGTTATCTTCCACAGCTTTGGCCTTCTGGATCTGGCTGAGATCACCAATACTCCCAAACTCCTGTTGAATTTGCTAATAGTATCGTTTTCCGTCGGCGTGTTTATCCCCTTCATTCTCATGCCGTTTCAGCCTGTAACAAAAACTGACAATTACACAATAGGCTTTGCGGATATGGAGAAGGCAATGTCG…
19751	c_000000004961	1012	3274	r	Ribonucleotide reductase, barrel domain	PF02867	ATGAAATTAAGTGAAAACGCCCTAATAGTACTCGAAAAAAGATATTTCCGTAAAGACGATGATGGCAAAACCATAGAAGATTGGAAGTCCATGATCAAACGTGTAGCCAGCAATATCGCGGGTCACGATAAGCAAAAGACTAAAAAGTACTTCAAGCTGCTTGACAGCGGTTACTTTTTGCCAAACTCACCCACCCTGATGAATGCTGGCAATGATCTGCAACAGCTGTCAGCTTGCTTTGTGCTACCTATAGAAGACAGCATGGAAAGCATTTTTGAGACGGTCAAGAACGCAGCCTTAATCCATAAAAGTGGTGGAGGCACGGGTTTTTCTTTTAGCAGACTGCGCGAAGCCAATGCCCGGGTTCGTTCCACGAATGGTGTTTCCAGTGGCCCGCTT…
19752	c_000000004961	3282	3816	r	beta-keto acid cleavage enzyme	PF05853	TTGAGCCTGCACCCTGATATGGGCACTTTGAACGCAGGCACTCTCAATTTTGGAAATGACATCTTTATCAATCACCCCGCAGACATTGTTAAACTGGCTGAGGCGTTCAAACAGTACAATGTGGTTCCAGAGGTGGAGGTTTACGAGTCTGGGATGATCGATTATATTGGCAGGCTGGTAAAAAAAGGCATCATTACCCATACTCCTCTGCATGTCCAATTTGTTCTTGGCGTTCCGGGAGGGATGAGTGGTACACCTAAGAATGTGCTTTATATGAAGGAGCACCTCGCGGAAATCATCCCAGGAGCCACCTGGGCTGTGGCGGGGATCGGCAGATATCATATCCAGGCTTCTCTCACGGCAATGGTGAGTGGAGGACACATCCGAGCAGGATTTGAA…
19753	c_000000004961	3812	4106	r	beta-keto acid cleavage enzyme	PF05853	ATGAATCCCCTTATTTTAACAGCAGCTATAACTGGTGCGGAAACGACCAGAATAGATCAGCCGAATCTCCCCATCACTCCAGAAGAACAGGCAGCGGAAGCAAAGGCTTGCTATAAAGCCGGTGCCAGAGTGATACATCTCCATGTGCGGGATGACGATGGTAATCCGACCCAAAGCATGAAGCGGTTTCAAGATTCCATTGAGGCAATCCGTGCTGCTGAACCAGAGTTAATCATTCAGATAAGCACCGGCGGTGCTGTTGGAGAAGCTTTTGAAAAGCGTTGGCCCCCTTGA
19754	c_000000004961	4143	4824	r	Asp/Glu/Hydantoin racemase	PF01177	ATGGGCCAAAGTCTCACAACACCATTATCGAATACTCGATCCAAAAACGCGCGCTTTCTCCTTCAAAAAGGCATCAAGATACTTATTGTAGCCTGTAATACATCTGCCGCTGTGTCTTTGGATGAACTCTGCCACCTAACAAACATCCCCATAATAGGCGTGATCACACCAGGCGCTGAGGAAGCTGTGCGTAGCACAAGGAATAAACGCATTGGTGTAATCGGTACTGAAGGAACCGTCAGATCCGAAGCTTATACAAGGGCAATTAGCAAGCTGATGCCGGATGCGGTGGTGTTTTCTAAAGCTTGCCCGCTCTTCGTCCCCTTGGTTGAGGAAGGCTGGACTGATCACCCAGTTGCAAAAGCGGTCGTGCATGAATACCTGCACGAATTGCAACAA…
19755	c_000000004961	4941	5751	r	RNB domain	PF00773	TTGCTATCTCATTATGGTATTAGCTTCTACCAAAGGGATTCTCTGAATGCCTCTATCCAGTATCTCTTGTATTCGATGCCTGGTCCTGACTATCATAAGGTCTTTGACAGGATTATTCTGCGCAGTCTTAAGAAAGCAAAGTACTCAACAGAGCATATCAGACACTTTGGCTTGGGTATGGAAGACTATACACACTTCACCAGCCCAATCCGCAGGCTTTGCGATCTGGTGATCCATCATCTGTGCAAAATCCATATCCTGCACAGCAGCAAAGAAAAGATATCACCCACCCAATTGAAATGTTTCGCATCCATCGCCACAGAACAGGAACTACAGGCAGATCAGGCTGAGCGTGATATTGAACGGATCTATAGCCTGGCATATATGAAAGGTCATATC…
19756	c_000000004961	5705	6374	r	RNB domain	PF00773	ATGGCTGGCGTTTTATACGTGCATATAGCTGATGTTGCGCACTATGTCAAAATGTCGGGATCGGTGTTTGCAGAAGCGGTAAAACGTGGGAACAGCTTCTACTTTCCAAAAAAAGTAATTCCCATGCTGCCAGAGCGACTTTCGAACAAGATATGCAGTCTGAGGCCTTGGGAAGATAAACTGACACTCACAGTTATAACGGATTTTAATACCGGTGGTAAGATCACCAAACAGCAGCTGGTTGAAAGCGTGATATGCAGTGATCAGCGCCTCAGCTATGAAGAAGTGGACGCTTTTTTTGAGGGCAATAATAGTGATTTATCAGAGCAGCTACAACAGTCTTTGAACAATGCGAGGGAACTGTCTGCGCTCCTAACTGACATTAGGCTTCGCAATGGA…
19757	c_000000004961	6342	7239	r	RNB domain	PF00773	TTGGGAATTAAAGACATCCAGGAAAGATTGTTAACACTTCTTGTCGATACCGGTAATAAGGGATTGTCTTATAATGAGATTGTGGGACAGTTGAATTTGGTTAGAAAGGAAAAGTCCCTTTTGTCCGAAGCATTACAAGGCTTCATAGAATGCGGTAAACTGGAGAAACGCAATCGCAAATACAGACTGATCGATACCAATTTGAAAGATAAGCATAAAAACACTGCAACTTCAAAACCAGGTTTGATAGAAGGCCTATTTGACGCTACGCCGCTATCCAGAAATCAGTCATTTGCCTTTGTTCGCACTGAGCAGGGTGATTTTTTCATCGGCGCAGAAGATACGTTAAATGCCTATCATGATGATTTAGTGAGTGTCGAGCCTCACTATCGAAATGGC…
19758	c_000000004961	7248	7452	r			CATTATTCTCTGATAAAAATTACCAGGCGCTATACAGACTTTGGCTGCTTCTATGCAGATAAGCGTGGCATCATGCTGAGCACCTTTAAATTACCTCGCAGGCTAGATAGATTTAGAGGACAATCGCTACGTTTCTCAAAAGACCAATCTGAAAAAGAAGCGTTGATTGAAATACTTAACAGAAAGATTGGTAAACAGTATTAG
19789	c_000000004971	244	724	f	Glycine cleavage system P-protein	PF02347	ATGCCGGGACGCATTGTGGGAGGCACCCTGGATGCCGAAGGCAAGCGGGCTTACGCGCTCACCTTGCAGGCAAGGGAACAGCATATCCGCCGGGCAAAGGCAACCTCCAACATCTGTTCAAATGAATCGCTTTGCACCCTGGCGGCGACTGTCTATCTGAGCCTGATGGGACGGGAAGGGCTGGTGGAAGCCGCCACCCAATCCGCCCAGAAAGCCCACTATCTGGCTCAGGAACTCGCCCGTATCAAGGGCTGCTCGCTATCCTGGCCGGACACGCCGTTCTTTAAGGAGTTCACGCTGCAAACGGCAATCCCGGCGGCGGAGATCGTGGACAGGCTCAGCTCCCGGGCGATCTTTCCCGGAGTGGACTTGGGCCGCTTCGGCCAACCGGACAAGCTG…
19790	c_000000004971	716	2171	f	Glycine cleavage system P-protein	PF02347	ATGAGTAAGACCATTTTTGAACACAGTTCCGCAGGCCGCAAAGGCGCAACCCTGCCCCGGCGCGAGATAGATATCCCCCTGCAAAGCATTATCCCCGCCGATCAGCTCCGCGAAAAGCAGGCCCGCCTGCCGGAAGTGAGCGAGCTGGATGTGATGCGCCACTATATCGCGCTGTCCCATAAAAACCACTTTATCGAAAAAGGGCTGTATCCGCTTGGTTCCTGCACCATGAAATACAATCCCAAAGTGCATGAGGCCCTGGTGCGGGATTCCGGTTTCAACAATCTGCACCCCTATCAGCCAGAGGCGACGATCCAGGGCTCTCTGGAAATCCTTTATGAACTGCAGGAACAACTGGCTGAAATCTCGGGCATGAGCAAAGTGACCCTGCAACCTGCG…
19791	c_000000004971	2209	2839	f	Outer membrane protein (OmpH-like)	PF03938	ATGAAGAAGACTTTACTGCTGATCCTGCTTGCCCTGGCAACCGTGGCCACGCTCCTGGCTGCCGATGTCAAGCTGGGTTATGTCAATACAGACCGCTTGCTGCTGGAAAGCAACGAAGCGGCTGAAATCTCACGCTTGTTCAATCTGGACAAGCAAAACTGGACCCGGCAGGTGAGAGAGCTTGATGAAGAGATCAAGCGTATGGAACGGGACTTTGAGATTGGCAAGCTGACGCTCAACGAAGCCCGCAAAAGAGAGACCCAGGCAGCCATCGACGCCAAGAAAGCTGAGGCGGGGCGTATGCTGGAGGAATACTTTGGCGAAGGCGGAAAGGCGGAACAGAGATACCGCGAACTGATCGATCCGCTCACTCTGAAGATCCACAATCTGATCAAAAAG…
19792	c_000000004971	2835	3879	f	Bacterial transferase hexapeptide (six repeats)	PF00132	ATGAAGAAATTCAAGCCCGCGCTCAACGTCGAGCAAATCTGCCAGATCACCGGAGCCGTCTATCAAGGCGAGGAAAATCTGGTTTTTGACAACGCCTGTGAGCCATCGGATGCCACTTCAAGCAGTGTAATATTCTGGGAGCAGGAAAAAATGTTTGAGACTGTGCAAAACAGCGGGGCAGGGCTCATCATCTGCCCTCCCCAGGAAGCGCACCGCCTGCCCGGACGCAACCTGTTGCTTTCGCCACGGCCATATTTTACCCTGATGAGCCTGGTAGCCTGGTGGCTGAATGAGGCAACGGACAAACCCGCCCCCGGAATACACCCCTCCGCGGTGGTCGATCCCACCGCCAGCCTCGGCGACGGTGTTAGCATCGGAGCACTGGCCAGGATCGGCAAA…
19793	c_000000004971	3875	4277	f	UDP-3-O-acyl N-acetylglycosamine deacetylase	PF03331	ATGATGACAGAATATAAGAATACAATCCGCTCCGAAGCTTCATACACCGGCATCGGATTGCACACCGGAGAAATCTCCACCATCCGTTTTAAACCTGCGGACAAGGATTCAGGTATCGTCTTCGTCAGGGTGGACATGCCAGGCCAACCTGAAATCCCCGCCGACATCGACCACGTTGTGGATATGTCGCGCGGCACAACTATCGGTATCAAGGATGCCACCGTGGGAACGATTGAGCACGTGCTCTCGGCCATCAAGGGCTTGAATATCGACAACATCCGCATCGAGATTGACGGTCCCGAAGCTCCTGTGGCAGATGGCTCTGCGATAGTATTTTTGAACCTGCTCAAAAAAGGCGGGGATTGTCAAACAGGATGCCGAACGCGAGTATTTCGAGTT…
19794	c_000000004971	4311	5277	f	UDP-3-O-acyl N-acetylglycosamine deacetylase	PF03331	GTGGATATCGTGATCGTGCCCTCCAACGAACTGAAGATCACCTTCATGATTGACTACAAGCACCCCTATCTGGGCACCCAATATACCTGGCTGCCTGACCTTAGTGTGTATGAAAAAGAGTTTGCCGGAGCCCGCACTTTCTGCTTCATCAATGAGATACTGAAACTCAAGGAAATGGGCCTGATCAAGGGAGGTTCACTCGAGAACGCCCTGGTGATCGCGGAACCTGGCATCAGCGACGAGGAACTCAAACACCTGCAGGATGTGTTTGGCTATCACGAGCCCATCACGGTCTCTCCCCAGGGAATCCTCAACAGCCATCCCTTGCGGTACTACAACGAGTTCGTGCGTCACAAAGTGGTTGACCTGCTGGGTGACATCGCCTTGCTGGGCGTGCCG…
19795	c_000000004971	5273	5648	f	Bacterial transferase hexapeptide (six repeats)	PF00132	ATGACTAAGATCCACCCCACGGCAATCATTGATGAGGGCGCGCAGATCGGGGCTGACTGCGAGATCGGCCCCGGGTGCCATGTAGGGCCTTCGGTGGTCCTTGGCGACCGCAACATCCTCATCTCCAACGTGATCCTCTCCGGACACACCACGATCGGGGATGACAACAAGATATCCCCTTATGCTGTTTTGGGCACAGACCCCCAGGACCTCAAGTTCAAGGGAGAGCCCACCCGTCTGCGTATCGGCAGCCGCAATAAGATCAGGGAGTTTGTCACCATCAACCGCTCCAACAACATGGAGGAAGACACTGTGGTGGGTAACGACAATCTGCTCATGGAATATGTGCATGTGGCCCACAATTGCCAGATTGGC
19948	c_000000005017	227	704	f	RimP N-terminal domain	PF02576	ATGGAATATTACCGTGCGCGAATTGAAGAGATTGCCAAGCGCGTCTGCTCAGATATGCATCTGGCGGTGTATGACATTGAGGAAAAAATGAGCGGCAAAGGCCGGATCATTACTGTCTATCTGACCAAGGTAGGCGGTGTGACCATCGATGAATGCGCCCTGTTCAGCCGTGCTCTGGGTGATGAGTTGGAAGAGCTGGACATCATTCCAGACCGCTATTTTTTGGAAGTTTCCTCGCCAGGCATTGAGCGCCCCCTCAAGCTTAAGAGCCATTACGTAAGCGCCATAAACGAGAAAGTTGCAGTGCAGTGGGATGATGGCGAATCACGCCAATCGGCCATGGGAACGCTTACTGTGGTGGATCAGGACAGCATCACCCTGGACGACCGCGGCAATCAG…
19949	c_000000005017	715	1936	f	NusA-like KH domain	PF13184	ATGGATGCGGTGGTGAAGCTTGCCGCTATCAAACAGCTTGATAAAGATCTGATTCAGGATATCATAGTTGAGTCTATTACCGGCACCCTGGCCAAAAAACTGGAGCCTGAAAGCGAGCTGGAAGTGTTTGTGGAAGAACAATCCGGTATGATCAAGGCGCGGTTCAAATGCCTGGTGGTGGAAGTGGAGACCAAGTTGGGCGAGATGTCTCTGGAAGAGGCCAAAAGAGAACATGACCGCTACGCCGAACTGGGGCAGTATATTACCAAGACCATGGCCATGAGCGAGTTTGAACCCAAATTGGTGAAAATAGCTCAAAAAGCGATCCAGGACAAAATCCGCCAACTCGAAGAAGAGAAGATCCAGAACGACTTCAACAAACAGAAAAACACCATTGTC…
19950	c_000000005017	1935	2292	f	Protein of unknown function (DUF448)	PF04296	ATGCCTAATAAAAACAGCAGCATGGGCCATAAGCCACAGCGAACATGTGTGGTTTGCAGAAGCAGAAAAGAGCAGGACAGCCTGCTAAGCTTCATCTTGCTTTCCCAGGGGATCGTCTTCGATCTCAGGCGCCGGCTGCAAAAACGCAAGTATTACGTCTGTCATTCCCGGCAATGCCTGATAGGACTTGACAAATGGGAACGGCAGCAATTGAAGCGAAGATTCGCCATAAGCAATCATAAACCGGTCTTTTTCGGCAGCCGCGGCTGCGATTGGGAAGGAGAAGCGATGAACGCAAACCATTCCTATGCGGAAAAGAATCATGAACCTGATGCAATTTGCCCGAAAGGCAGGTAA
19951	c_000000005017	2257	2554	f	Ribosomal protein L7Ae/L30e/S12e/Gadd45 family	PF01248	ATGAACCTGATGCAATTTGCCCGAAAGGCAGGTAAACTGGTTAGCGGAACTGATGCCTGCCTGAGAGGCATATACTCTCACAAAGTGCATCTGGTGGTGATAGCCGAGGATGCCTCGGAACGGACTTTCAATAGAATTAACAACGCCACAAAAGATTATGGCGGCAAGATACAAGTGATCAGGCTTGGTTTACAAGCCGGATACAGCGCCGCTCTTGGCCTGCCTCTGACTGCTGTGTTTGGGGTCGGGGACAGGCAATTTGCGGACAAGATGCTGGAGTATTACGCTGCCGGCTAA
19952	c_000000005017	2570	3518	f	Translation initiation factor IF-2, N-terminal region	PF04760	GTGCAGATACGAGTACATGAACTTGCCAAGGAATTGAAGATCAGCACCATGGCATTGAGAAAACATCTCACCGATATGGGTGTGATGACCAAGAGCCATATGAGTCTGATCGATGTTGAAGTTGCAGACAAGATCCGGATGAAATACAATGAGCAGATGGACATCGAAAAGAAGGCTGAGAAAGAACGTAAACGCCTCCATGAGATGCGACAGGCGGCAAAAACCGAGCAGGCCGAGGAAGAATTGGAAGCCAAAGCCAGAGCGGAAGCAGCAGAAGAGACCAAGACCCCGGAACCCGAGAAAGCAAAGCCGGAGCCAAAAGCGAAAGCGAAAGCGAAAGGTAAAGCCAAAAAACAAACTGAAGCTGAGGGAAAAGAGGTTGAGGCAGAACCGGTCGTT…
19953	c_000000005017	3569	3908	f			ATGATGGGTCAGTTGGTGACAATGAACCAGAGGCTGGATCGCGACTCTCTTGAGATGATTTGCGACGAGTTCAAGGTGGAATTCCGCTTTGAAGATGAGTTTGGTGTGGAACTGATTGATCTGGAAAAAGAGCAATATCAGGATGTCGAAGAGGAACCCCGGCCGCCGGTGGTGACCATCATGGGGCACGTTGATCATGGTAAAACGTCTGTTTTGGACTATATTCGCAACACCAATGTTGTGGCAGGAGAATCAGGCGGAATAACTCAACATATCGGCGCTTATCAAATCGAGATAAACAAACATAAGATAACGTTTTTTGGATACCCCCGGCCATGA
19954	c_000000005017	3942	5229	f	Translation-initiation factor 2	PF11987	GTGACAGATATCGCGGTAATCGTGGTTGCTGCCAATGAAGGTCTAAAACCTCAAACCAAGGAAGCCATTGACCACGCCAAGGCGGCTGGAGTGCAGATCATAGTCGCAATCAACAAGGTCGATCTGCCTGACGCCAACGTGGATCGTGTGGTGGCGCAACTTCTGGAATATGGAGTGCTTTTGGAGCAATACGGAGGAGAGGTGCCCTGGTGTAAAACCTCCGTGGTTACAGGTGAAGGAATCCTGAATCTGATCGAGATTATATTGCTAACCGCTGAGATTATGGAACTGAAAGCCAAACGTAAGGTTCCAGGCTCGGGTGTTGTAATTGAGTCGGAAAAAGATACCCGCATGGGTTCTGTTGCCACCATCCTGATGCAGGAAGGTACCATCGGTAAA…
19955	c_000000005017	5228	5732	f	Ribosome-binding factor A	PF02033	ATGAAATCTTTCCGCATACCACGCTTACAAGAGGAACTCAAAAAGCTCTTCAATATCACGCTCAGTCAAAAACTGCGGGATCCCAAGCTGGATTGGGTTACCATTACTGACGTGGTTCTTTCCAAGGATCTCAGATACGCAAAGGTCTATTTTTCCCATTATATGAATCCCGCATCTCATGAGGAGATCAGGGAGCAGTTGATAAAGACATCAGGCTATTTTAAAAAACAAATTGCAGGAGCTCATATTATGAGGACAATTCCCGAGCTTACATTCTTCTACGACGATACAGAAGACAGAGCGGAAAAAGTTGACAAGCTGTTAGCCAGAATCAAAGACAATTATAATGACGAAGACGCTTATGATCCCGATATAGATCTGGATGATTATCTCGATGAT…
19956	c_000000005017	5829	6834	f	DHH family	PF01368	ATGAAAGATACAGGTAAGCTTAAAGAAGCCATCAGCAATCGTTTGCTGAAAGGTGGCAGGATTGGTATAACAACCCATATTGCACCTGATGGAGATGGATTCTGCGCCGCTTTGGGTTTGCAAGCACTGTTCAAGGCAAAAAGCATAGCCAGCGAGATAGTAATTGATGACACTAACTTGGAGCGTTTTTCATTTTTAATGGCAGATGCCAACCTTGTCAGGTATGCTTCCGGAATGGTCTATGATTTGCTGTTGGTTCTGGATTGTAATAGCTACAGCCGGGTAGGCGAGCGCGAGGAAATGCTCAGACAGGCCAGGCAGGTGATTGTGATAGATCACCATGTGCCAGAAAATGGAGTAATCGAGGCTGATTATAGCCATGTGGATATCGACAGTGTC…
19957	c_000000005017	7080	7686	f	TruB family pseudouridylate synthase (N terminal domain)	PF01509	GTGACCGGGAAATCTGCTTCTATTCCTGAACACATAGATGTGGAAGCAGTCACCAGGGAAGTGCTGGCTCTAACCGAGTTGGAAGTTCCGGCATATTCGGCTGTCAAAATTCAGGGAAAACCAGCCTATGCGTTGGCCCGCCAGGGTGTGAGCCTAAAGCTTGCCAAAAGGCCAACCCATATTTCTTGTTTTAAGATATTTGAGTACAGGGCTCCATTTTTAAGCTTTGGCTGTACTGTGTCCAAGGGGACGTACATCAGAAGTCTGGGAGAGTTTATCGCAAGCGTTGCCGGATCTGTAGCCCATACGGTCAGTCTCTGCAGGACCGCCATAGGCGGTGTCGCCTTGGAGGAAGCAATCGCCCTTGATGATCTTAGCCCGGATAACTGGAGCGGAGTT…
19958	c_000000005017	7689	8286	f	FAD synthetase	PF06574	ATGTGTAGTGTATTGAGCATCGGCAACTTCGACGGCGTGCATCTGGGTCATCAGAGGATTTTGCAGCGTTTGGTTGATCTGGCCAAACAGCAAGGCTATCGTTCGGTGGTCCTTACTTTCGATTCACATCCGGCATATATACTGAACCCCGAAGCCCAGCCTGAAACACTCACCCCGAGGGAAGAGAAACAGTATCTTCTGACCACCCTCGGAGTGGATAAGGTGGAGTTTATCCACTTTGACAAACGCTTTGCCCAACTTACCGCCAAAGAGTTCCTTGAGGAATACTTGATTCCGGAATTCAAGCCCAGGGTCATAGTGGTTGGCTACGATTCCCATTTTGGCCATAACCGGGAGGGTGATCATGAGTTTCTGGCCAGGTGGTCTGGGCAGTATGGC…
19959	c_000000005017	8276	8585	f	Riboflavin kinase	PF01687	ATGGAATTAGCAGACCCACATCAACTGGTGCCTCGCTCCGGAGTGTATCTCAGCAAAGTCCAGATCAGGCAGGGTGAGTTTTTTGGATTGACAAATATAGGTGTCAGCCCAACCTTGCGAAATGACGACAAGACCATTATCGAGACATATTTACTGGACTTCTCAGATCAAATCTATGGCAGTCCTCTTGCCATCAAACTGCTCAGATATCTCAGGGAGGAGAGGATGTTTCAAAGTCAGGCGGAGCTTGTTGCTGCAATGGAAGGCGATTTAAAGCAGGTAAGAGCTATGCTCAACGAGGCAACATGA
19960	c_000000005017	8581	9265	f			ATGAAGCGGAATCTTATTATCCTGTTTGTTCTGATCTGTGGCAATTGCCTGGCGCTGGTGTGTTTGCCCGCAAACGGCGAAAGCGTTATGGATGCACCCCATCGCGAATACGAATTTCACTATCATAACAACAGTGATGACTACCATTTCTACGGATCAGATGTATGGGCTGTGCGATTCGATTTCAAATCAGTATATCCCAATCTCGATATCTGTGAATTCTCTGTCAATAAAGCCTTTATCTACCTGCCTCAAACCGGAGATTCCATTACGGTGGACCTGTACAGCGACGCTGACGGGATCTTGGGTAGCAGGATCACTGGCACCAGCACTCTTGCCCAAAACAACTACCTGGTATTGGTCTTTCCCCAGGTGGTTCAAGCGGAAGCGCTTTGGCTC…
20179	c_000000005071	0	129	f			AAACGCACCATTCTCAAGGGAGAACTCCGCAACGTGGAAGTCGAGTTAGTCTCGCTTCTCTTCGATGAGATGACTCCCGCCAATCAAAAAGGGTTTTGTGGTCAAGAATGCCAATGGCAGAAGCTTTGA
20180	c_000000005071	97	1723	f	Putative phage serine protease XkdF	PF14550	GTGGTCAAGAATGCCAATGGCAGAAGCTTTGAACACAAGATCAACTCCACCAAGTTCAAGAGTGAAACATCCGGCACCCAGGGACGATTATTCGTTACCCTGATGGAGCCCAACATCCACGATTCCCAGGGTGACTATTACACTCGGGAAGAGATTCAGAAGGCCTGCGATCACTTCGCCAAACACGGCTTAGTCGGCAAGTGTGACGTCAATCACAACATGCAGCCGGTGCCTGAGTTCACTGTGGTCGAGAACTACATCCTCAAGACCAGTGACCGTGAACACTTCCCCGATACCAAGGTGGGTGCCTGGGTCCAGGTCTTGAAGTGTGAAGATCTGGGCAGTGAGCTCTGGCAGAAGGTCGAGAAAGGCGAGTTCAATGGTGTCTCCATCTACGGA…
20181	c_000000005071	1752	2103	f			ATGGACTTCATCTTCGCCAATCAGGAGTTTATCCTGGGTCTGATCTCGGCTCTGGTGGTCTGGATCATCTCCAGAACCACCGGAAGTGTAATCGACAAGGCCAAGGTAAACTCGGCTCTGGCTATCATCCTGGACATCATCCAGGACATCAAGATCAACCCTGCCACTAAAGACCTGGATGACTATGCCAAGAAGCAACTGGCAGTGGAGCGGGCTACCAAGTCCCTCCCAACCAAGCAGACTAAAGTCATCCTCAAGGTCTTCGGCACTATCGGAGGAGCCATCGAATACGTGTTCCACAACCGCAAATGGCTCTTTAGCATCGGCAAGGCGATCAAAGGGGTGTTCTGA
20182	c_000000005071	2102	2648	f			ATGCCCAACCCTATCACACCACCCACTTATCCCGCCCCTATGACCGAGGGTGACCTCAGCTTCAGCAAGCTGATGGATGTCTTGATTGCCGATCTCGTCTATTTCGGGATCGGCACCTACGATCAGACTTCCATCGATACGCTGTATGCCACTCAAGGCTCGGTCAAGACGGAACTGACCACCAACTTCGATCTGCTCGGCGAACTGGCCGAGAAGCCCGGTAAGACGGACTCCAAGCTTTCCAAGCTCAAGACCCGCAATTATACCATCCCGGGCAAGAGAACCAGCACGGTCGAACTTAACATCTCCGGACTCTCCACCAAGCAGAAGAACTTCCTGGAGAGCACTCTGTTCATGAGCAAGGACACCACCATCGTGGTGGTCTCCAAAGAGTATGAC…
20183	c_000000005071	2694	2895	f			ATGGATTGCCTGTGTAAACCTGAAATCAAAGAGAAAATCGATTCAGTGCACGAGGAGATCTATGGCAATGGTGACAGCAGCAAGTCACTGGTAACCAGAATGGCGAGAGTGGAGACAAACATGAAGATACTTCTGTCCGTCTCCACCTCCCAGTTCTTCCTGCTGTTGGGCATTGCCCTCAAGATGTTCTTCGGCAACTGA
20184	c_000000005071	2909	3260	f			ATGAAGCGAGAACCCAAACTCAGCTATAGCCAACTGCGGCAAATACTCTGCCTCACTATCTCCAATGCGACCCTGAAAGCCAAGCTGGAGGACTTCCTCTCCGGCCAGGTAGCCAAGGTGAGTGAGGTGGAATTGCTGGAACTGATCAGCCAATCGGAAGCCGATAAAGAGCTGATCAAAATCATCTCAGGAAGAGAACCTGACGAAATGGATGCCCTTGAAGCCCTGGAGCATATCTCCGCTTTTTTCGTCTATATCAGAGCCAACAAAGAGAGGTTCGCAGGTTGGCTCGGGAGTTTCGGATTGGCGGTAACAGCGTCTCTAAATACCCCTTCGAGAGGTTCGAAATGA
20185	c_000000005071	3256	3370	f			ATGATCCTGCGTAAACTGGGCTTCACCAATGATGATTTCAACAAGATGACTCTGCCAGAGCTATACCTCAGGCTCTGTATCACCGACCCAAAAGCCTACAGTGGAGACGCATAA
20186	c_000000005071	3369	4131	f	D12 class N6 adenine-specific DNA methyltransferase	PF02086	ATGGATGCCATCATCGGCTGGATAGGCGGCAAACGCCTCCTGAGAAAGGTTATCGCTCCCTTTGTCCCCAAGGATATCACCGGGTATATCGAACCCTTCGGTGGTGCTGCCTGGATGCTCCTCTACAAAGAGAAGTGGGGAGAGCTGGAAGTCTATAACGATCTGGATAACCGCCTGGTCAATCTCTTCCTGCAGGTGAAGTATCATCCTGATGAGCTGATCAAAGAACTGGACTGGTTAGTCGCCAGCCGCAAGCTCTTTGGTGATATCCTCAAGCAGGAAGGATTAACCGAGATACAGCGTGCTGCCAGGTTCATGTTTCTGATCACCAGATCATTCGGCAGCAAGGGTGACAGCTTCGGCACCTCTCAGAAGCGTGGCACCTCCAGTATGTATAAC…
20187	c_000000005071	4127	4562	f	D12 class N6 adenine-specific DNA methyltransferase	PF02086	ATGAACAGCATCATCTCCTGGGTAGGTGGCAAGCGTATTCTCCGTAAGAAAATACTACCGCTTATCCCCAAGCATGACATCTACTGTGAAGTCTTTGGCGGTGCGGCCTGGATACTGTTCGGGAAGAGTGCCAACAAGGAAGACTGGCAGCTTTCCAAAAAGAGTCGCTATACTGAGGTCTATAATGATATCAATGGCGATCTGGTGAACTTCTGGAGATACATAAAACAGCATCCTGAAGCGTTTGTGACTGAGTTGAACCAGTACTTAGTATCGAGGGAGATGTTCGATAACTTTATGAAGCATGAACCCAAAACCGAGTTGGAAAGAGCGATCAAGTTCTACTATAACCTCGCCTGCAGTTATGGCTCACGCAGTAAAAAACTTTTGCGTCAATCA…
20188	c_000000005071	4539	4938	f	D12 class N6 adenine-specific DNA methyltransferase	PF02086	ATGCCCCTGAGGAATCTGGATAAAGTAAAGGAAGCATCGGAACGATTGCGCCATGTGATCATCGAAAAACAGCCTTGGGAGAAGATCATAGCCCGTTTTGACCAGCCCCACACGTTCTTCTATCTGGACCCTCCCTACTATACCAAGGAGCACATCTACGAACGTGAGGACGCAGATACCTTCAACCAGCATGAAGAGCTGGCGGAAGCCTTGAAACAGATCAAGGGCAAGTTCCTGCTATCCTACAACAACGATCCTTACATCAAGCAGCTATACGATGGATGTGTCATTGAAGAAGTCGAAACGCAGTACTCGGTGTCCGGAGCGTTCCAGACTGAAGTTGAGCTGCTAATTAGGAACTACCCAATCGGTTGTTCTACGTCTTGTAAACACGAGTAG
20969	c_000000005278	0	153	f			TATAACCCTGACGCCATTGTGATCGAGTGCATGGCGGTTAATCCCGTCTTCCAATGGATCACAGAGCGCAAGTTTGTGCGCAGCACTATTGCGGTGATCACCAACTGCCGGCTGACCATCTGGATCAAATGGGTTCAACCGAGCAAAGCGTAG
20970	c_000000005278	155	902	f			ATGTCGCTTTCCAACACCATTCCCAGCGGAGGTGTGTGCTACACTGCTGAAAACCGGCATTTTGGCCTGCTGGAAAAGGTTGCCGGGCAAAGAAACTGCAGAATCCACAAGATCAGACCCACAGACGTCACGCAGGAAGAACTGGCAAAATTCAAGTACATAGAGCACGCGGAGAACGTGCAGTTGGCCCTGGCTGTATGCGCGGAAGCGGGAGTCCCCCGGGAAATAGCGTTGCAAGGCATGCAAACAGCCAATCCCGATCCTGGCGCATTAAAGAAATATGTCATCCGGGATGGAGACAAGACCATCCACTTCTACAATGTGTTTGCCGCCAACGATCCGAACTCCACTAAACTGGTGATCAATATGGTCACGGGACATCTTAAAGATGTGGAGAAA…
20971	c_000000005278	894	1350	f	Capsule biosynthesis CapC	PF14102	GTGATTGAAACTGTAATTCAGGCGGCAGTCGGGCTGGGAGTGATCGTCAGCCTGATCTTCAGCGAACTGCTGGGAGCCTCGGCTGGAGGAATAGTCGTGCCGGGTTATGTGGCTTTATATCTGGACAAACCCATGCAGATCCTGGGAACTCTGATCGTCAGTCTGGCTACCTGGGGCATCATCCGGATAATAAGTCAGTTTACCCTGATGTTTGGAAAGAGACGCATGGTTTTAAGTATCCTGGTCGGATTCATCCTCGGATGGACTACCCGCTTGCTGGTTTTTCACAATATTACCATCTACACCTATCAGATGCAGTCCATTGGCTACATCGTCCCCGGTTTGATAGCAAACTGGTTTGAACGCCAGGGTTTTTGGAAAACAGTTTCCACTATGGGC…
20972	c_000000005278	1351	2473	f			ATGTATCGTCCCTCATTAAAATCCGGCTGGTCGCTGATCCTGCTCTTCATTTTCGCCCTTATCCTCTTTGTCATAGCTCAGAGCAGCTATGTGACAATTGAAGCTGACTTCTATCAGCAAAAGGTGGAAGCAGCTCAAACCATGAAAGCCTGGATGGATACGCTCAAGGCAGAGCAGACCCGCCTCTCCATCCCCTTTGACCCTATCAACGATCCCTATCAGACTGGCCTGATCGGTGAAGCCCGCAGCACCATCACCACAGACCGCGGTCTGCTTTCGCACAAACAGGCGGCTATCAACCCCAACCTGGGTGTGATCTTTGTGGAGGAATTCAACAAGGCCGGGCTCAATCCTGGCGACCATATAGCTGTGGGTATCACAGGCTCGAATCCAGCAATC…
20973	c_000000005278	2486	3299	f			ATGTTCAAACGCCTTATTACTATTATCGCTCTGTGCCTGGCTTTCCTCAGCGCCTGGGCAAAGATGAAACCCCTAACCTTCGATAACCCCGGCAACCGTCGCTTACTGAAAACAGAAACGGATAGCTACTACTATTTCAGAGCCAAACCGGAAAAATCAATGACCCTCAATGTGGAGGGCATAAGCTCCATCGAACTGCGTTCTTTCGCCATCGCAAAGCTCAACAAACCGAAAGTGATCTCCATCATTGGAAAGCAAAGCACCACTCATGACCTGGTTCTGCAAGAACGTTTGGAAGGTTTTTACCTGTACCAGCCGGTCACGATACCCATTCCCAAGGGCACCAAAAGCATCGAGATACTCTGTTACGACCGCAGCGTTTACTTCCGTCCGTTTTTC…
20974	c_000000005278	3308	4445	f			ATGTCCGACAAGCAAAAGAATATATCCGACCAGAGTTTCTCCGAAAACAGAACAACGGGAGCAGGAGCAGACAAGACCGATAGCACTGGAACGGATAAGGGAACCAAAAGGCCAGCACCCATGCGCGGTCCCCGCAACCTGAAGCCAATCATTATGAGCCTAATACTGTTTCTGGGCTTGGGATCACACCGGCTGCAAGCGCAGTTGGAAACCACTGTATCATTGACCGGCACCTATTCAGACAATGTGTTTCAACTCTCTGAGCATGACCTGCAGCGCTTCGATCAGGGACATCAGAATCTGTCTTTCGTGAATACCTCGGACGATCTTAGCCTGGCTTTGAGAGCGGATCTGGCCTGGCCTCTGCGTTACAAGTGGTGGAAGTTCACTCCATCAGTG…
20975	c_000000005278	4453	4774	f			ATGGTCTTCAATCAAGAAAAAGAGATCAAAAAGATTAAAGAGTTTGTGAATCTGGTGGAAAACCCCAAGATCGAACTGCGCCATTACAAAGACCCCGTACTGGTATGGGCTTTACAGGATGGAACGGTTTACTACACCATCTGGGAAAACGAAACTCTGTCAAGATTCGGCCTCAAAAATGTCGATGGCTGGGACTACGAGGAAGACTTGCTTTTTTGTCCGGATTGGATGAATCCCGAAGAAGATGAGGATGATGATCTGGACGATGACGATGATGATTTGGATCTGATCTGCGATCTCAAAATAGATATCAGCAATTAG
20976	c_000000005278	4990	5323	f	NAD-dependent glycerol-3-phosphate dehydrogenase N-terminus	PF01210	GTGGAGCGGTTTTCACCCCAAATTGTCATCCTGGCCACTCCTTCTCAATATCTCCGCCCCACCCTTCGCAGCATACCCCTGGAAGCCCAAAAGGGCATCTGGATGAGTCCCAAGTTGCTGGCCGTGGTTAATGTTGCCAAAGGCATTGAAGAGGGATCGCTGCTGACTCTGGACGCAGTTCTTGAGGAGCTGCTGCCAGAATCTGTGCTACACAAGATCTGCGCTCTCTCAGGGCCGAGTCATGCAGAAGAAGTGGCTCGCGAAGTGCCTACGGCGGTTGTAGTGGCAGGCAGAGACGAAGATCTGCTGATTACCCTGCAAGGAATTTTTTAG
20977	c_000000005278	5490	5814	f	NAD-dependent glycerol-3-phosphate dehydrogenase C-terminus	PF07479	TTGGCGTTGCTCTGGGAGCTAAGGCAGAAACCTTTTTGGGGGCTGTCCGGTTTGGGAGACCTCGTCACTACCGCCACCTCGCCGCACAGCCGCAACCGCTATGTGGGAAAACGGATCGGAGAGGGGAAAAAGCTGAGGCAAATAGTCCAGGAGATGGAGATGGTGGCCGAAGGCGTAGCCACCACAAATTCCGTGTATCAACTTGCTCTCCAGCGGGGTATCGAAATGCCCATCGTGAGAGAGGTTTGGGAAATCCTCTACCAGGAAAAAGACCCCAGGCAAGCCATCGTTAGCCTAATGACCCGCGAACTGAAAGCGGAATAG
20978	c_000000005278	6108	7257	f	Cytidylate kinase	PF02224	ATGCCAGAGAGATTGATCATAGCCATAGACGGTCCCGCCGCTTCCGGGAAAAGCACGACAGCGCGATTGCTTGCCAGGCAATTGGGCTACGCTTATCTGGACACGGGAGCCATGTATCGTGCCTGCGCTCTGCAAGCGCAACGAAAAGGTGTGGACCTTGGCGATGAACGGGCTGTTCAATCTCTGCTTCAGGACTTGGATATCCGCATCGAAATCTCAGGAGAGACCAACAGTATTTTCCTTGGCTCTGAAGACGTCACAGCCGCCATCCGCGCTCCGGAAATCTCAGCCCTGGCTTCCAGCATCTCAGCGCTGCCTCCCGTGAGGCATAAAATGGTGGAGTTGCAACGCAAGCTGGCAGCCTCCGGAGGAGTGATCCTGGACGGAAGGGATATCGGC…
21052	c_000000005299	0	516	f			AAACTGCGTGATTACAACTGCGGGTTCAAAGCGTACCGCCGGGAGGTGGTCAAGGAATTGAGGATGTATGGCGAAATGCACCGCTACATCCCCGCGCTGGCACACTCTCTGGGTTACCGGATCACCGAGATACCGGTGGAGCACAGGCGGCGCGAATTTGGCAAATCCAAATATGGGTTCGAGAGGTATCTGCGTGGGTTCTTCGACCTGCTCACGGTGAAGATGGTGACCCAATATGTCAAAAGCCCGCTTTATCTCTTTGGCCGCATCGGCTTGATCTCCACGCTGTTGGGAACCGCCATCACGATCTATCTCACGGTCCTCAAACTCTTTTTTGGACAGCCGCTTTACAACCGGCCCCTGCTCTTTTTGGGCATCATGCTCATCCTGGGCGGATTG…
21053	c_000000005299	517	1735	f	MacB-like periplasmic core domain	PF12704	GTGAATCAGGTGGAGCGCTTTTTCCTGCAACGCTATGTGCAAGATCCCAAGCGCAATCTCCTGCGCTTCAGTTTTGTATTTATGGTGTTGGGGATTGTACTTTCCGTGGGCATCCTCACGGCCGCCCTCAACCTCTTTGAAGGCTATGAGCGAGCCCTGAAATCCGCTTTGCTGGATTCATTTCCCCATATCAGCATACAGGCGGTGTACTCGCAATTCCTTGCTCCCCAAGACTGCGAAACTGCCAGGCAGGCGCTCGCGGAACAGCCGGAGATAGCTTCGCTCACACCCAAACTCACTTTCAACCTGATGGCTTACAACGGAAGTAAGGTCAGGGGCGGGCTGGTGAATGCCTATGCCTGGAAACAGGGAGAGCGTGTCAACTATGCCAAATATGTT…
21054	c_000000005299	1810	2413	f	ABC transporter	PF00005	GTGCTTAGAGATACCAACTTTGAAGTGGAATGCGGGGAGCTTGTCTGCATCACCGGAAAATCAGGCTGCGGAAAGAGCACGCTCTTGCATATTCTGGGGCTTTTGGATGATCCCGACAGCGGCAAAGTGCTGATCGGCGGTGAAGAGGTGTCTTCCAAAATGGCCAAAGCCAACCAGATCCGCAACCGGGATATCGGCTTCGTGTTTCAGTTTCACTATCTGATGGAGGACTTGAACTCCAGAGAAAATGTTGCCCTGCCGATGCTGATTTCCGGTTCGAACAAGCACAGCGCTTTCCAGCGGGCGGATGAACTGCTGGCCATGCTTGGTTTGGAGCAGCGGGTGAACCACTATCCGAATATGCTCAGCGGAGGCGAACAGCAAAGGCTGGCGCTGGCG…
21055	c_000000005299	2417	2822	f			ATGAAACGCCCGCGCAAGTTCCTGTCGTTCATTATCTTTCTGCTGCTGATCAACAGCTTGTTCTTCTTCGCGTGGTATGCCCTCGACCTGCAGGGCACTGTGAAGGGAATAGTGGAGCGGGAAGCGGGAAAGGCGCTCGGCGGAAAGTTGCGCATTGCGGATTTCACCATCAGTGACAGGCAGGTCTATGCTCAGGGCATCAGTTTCAAGGCAGCGGATAACTCACTCTCTTTCGAGGTGGACAACACCCGGGTGCGCTTCAATCTGCTGCGCTTTATCGTTTCCGGTTTCAAAATCCGCAACATCCTGAACCATATTGAGATCAACAAGGCGGATGTAGCCTTCAACTCTTGCCCGATGAAGAACCCAAGAAACCTGGCAAGAGGTTTGAGCTTCCGG…
21056	c_000000005299	2767	6493	f			TTGCCCGATGAAGAACCCAAGAAACCTGGCAAGAGGTTTGAGCTTCCGGATCTGACCCCTTTTTTCAATGACCTGAAAGTTAAGGAATCCAGCTTCCGCTTTCGGGGCGAAATACCGCTCGCGCTCACGGAAGAAGGCATGCTGGTGCTGGCGGACAGCCTTGGCGCCATCGATATTGAGGCGCGCAATTCCAGGGTAACCAGAGTCAGCCTCAGCGCGCGCAGCTCCAGCAAGGGGCTAATATCTGCCACGGCGGTTCTGGACAAGGGACGCCTCGTTTCCAGCCATGCCGAGATCAGCAACTTTGTCCCACAATACATCGACCATCCCCAGATCAAGGGCGCGGGCACGGAACTTAACCTTGTGCTTGACGCTTCCCAGCCCGCCAAAAATGCCCAC…
21402	c_000000005405	2	137	r			ATGATGTTATTTTCTTCTGCCTTGGGAGCCGTAACGCATTTTGATGGAAAGGCGGTGCGAGCTCTTGAGCAGGTTTTCTTTCAACAAGCCCATGTCAGTGTAGGCATAATCGATATTGAAGATGGCGAAACGGGT
21403	c_000000005405	194	446	f			ATGGAAAACCTCTTAACATGCCTCAAACAACTAATTGATGGATGTAATAATTTCAAGGGCCTAGGATTGATCGATAACAAATCGATTAGTTTCAGGTATCCAACGGATAGAGACAACCAACCTAGTATCGATCCGTTTGAAGTTATCTCTTTAGTGAAAGTAGAGGAGTTGTTTGATCAAGCGATAGTCTTGCTTGAGTACACTCCTTCAGTCCTTGGCGAGTACATTACTTCGGTAAGGTCTGATTGGTAG
21404	c_000000005405	487	1120	f			ATGAAGCCAGCCATCTATTTAGTGACATGCATCATAATGCTGTTTGGTTTGATGGGTTGCGTTACTTTCAATCAAGCACTTTATGACTTCGAACTTCAGGAAGTTGAAAGACCAGCACAGGCTAAAGAAAGGTACGGAGAACAAAAAATCGTTACTACGCAAGAAGCAGGAGTAAATAAGTATGTATTTGAAGATGAAATGGTAAGAGTACTGTGGTTGCCTACAACAGACGCAATCCATTTCAGCTTAACAAATAAGACTAATCACTCCATCAAAATCATATGGGACGAAGCGGCTTATGTGGATGTTGATGGAAGTAGCCATAGAGTTATGCATTCAGGAGTTAAGTACATTGACAGAACCAACCCACAACCTCCAACCATTGTTGTCAGAAACGGC…
21405	c_000000005405	1203	1704	r	Phage Mu protein F like protein	PF04233	GTGAGGCAGAACTTCGCCGACACCCTCTCCAAAGCCATAGAGCAGGGATATACCAAAGAGATGCTGGCTGATACTCTCAAAGACCAGTTCAATGATCTCGCAAACAAGTCATCCCACTACTGGCAAGGACTGGCAGAGCATACCGCTCTCAGAATACGGGAGTTTGGAAGGTTGCAAGGCTACAAGAAAGCCAAAGCCAAATACTACAAACTCGTAGTGATCCTGGATGATCGCACCAGTGATATCTGCCGGGCATTGGCAGCCCAGGATAAGATATACCCCCTGAACGATGCACTGGAAGTGATGGACAACCTCATGGCTCTGGATACCAAGTCTAATAGCCTCGATGATGCCCGGGAATACATCAAAGCACTTGCACCCTGGGTCAAAGACGATCAG…
21406	c_000000005405	1893	2079	r			ATGAACTACTATGATAATCTGATGTTGGAGTACTACCGGGTACTGAATAATGCATGGAAAACCGAGATCAAGGATGCAGCCAAGCTTGCCATCCAGATGCTGAGTGAAATGCCCCGAGCCGAGAAGATCAACAAGGACTCCATTGATAAAACTTATGGGCATAATCAATACTCAGTTGGGAGATGA
21407	c_000000005405	2078	2381	r			GTGGAGTGGTGTGGCTTGTTTCCTGCCCGCTTACTCCAAACAAAAAAGGACCCGCTGATTAGCGGTCCTATGTTCCATAACAAGGATAACAAGAACCTGAGGATAGAGAGAACCGAGACTATCATCGAGACTGCCAAAGTGCTATTTCCGGAGGGTCAAGACACGCCCACTCTGATCAGCCAGTTTCTCACCTATCCTGATGGCTATATCGATGGCTGTGATGCCCTTGCTGGCTGTCTGGAACGTTTCTCGGAATACGATATCGGCAGGAATAGAGTGAAAGTCCGGAGGTTCTCCTTCTAA
21638	c_000000005466	74	476	f	Prokaryotic dksA/traR C4-type zinc finger	PF01258	ATGGCGGCAAAACCATTATCAGCAGAGAAACTTAAGCACTACGAGAAGATCATTCTGGAAGAGCTTAAAGAAAGCGTTGCCTATTTGGAAGACACCCACAAAAACCAAAGCAAGGGAGCTAAGGAAAGCAGCGGCGACCTCTCATCCTATGCCTATCACCAGGCTGACCAGGGGTCGGATACCAACCTGATGGAGCATACCGTTATGATGATGGAACAGGAACGGGAAAAGATCAGGCAGCTCAACGATGCCCTCAAAAGAATCTATGACGGCACCTATGGACTCTGCGAAATGTGCGGAGAGGTGATCGGGGAAGCACGGCTGGAGATCATCCCCTACGTCACACACTGCATTACCTGCAAGGAAAAGCTGGAAGACAAAAAGCGCAAGCAGAACAGG…
21639	c_000000005466	472	1033	f	Signal peptidase (SPase) II	PF01252	GTGATTAGTGATTTGAAGGACAAACCCAAAAAATATCCGGCTTTTATAATAATGGCGATCGTGATCATCCTGGATCAGGTTACCAAGATACTAACCAGAGCGTTTACTTTGGAGGGGCATTCCTATCCTGTGCTGCAAAACATCTTCGGAGACACTTTCCGCTTCACCCATCTCCGCAACACAGGCGCGGCGTTCAGTATATCGCTATCCAATCCAGCCTGGAATCGGGTGTTTTTCGTATCCGCCACGGTTCTGGCTGTCGTGTTTGTCTTATATTTATTACGTCATGCCACAAACAAGATTCAGGTTATAGCCTTTGGCCTGGTTCTGGGAGGAGCCATTGGCAACAATCTGATCGACAGGCTGTTCTTCGGAGCTGTCACAGATTTTATCGATGTG…
21640	c_000000005466	1033	1435	f			ATGAGAAGTCTGATTCTGACTTTGATAGCGCTGATCATGGTTGCCGGCTTATCCGCGCAGCAAGTATTATCCGTGTATGACATCCAGTCATCGGTCGATGCCGCGGGAAACTCCACCTATGATGGGCAGACGGTTACAGTGCGGGCCATCGTAACCCACGTGATACCCAATTCCGCTTTTTACATCGGCGACGCGTGCGGAGGCCCCTGGAGCGGGGTGTATGTGTATCACCGCAACACCAGCAACGCTGTCTCCGTGGGCGACGACGTGCAGCTTACCTGCGTGGTGGATGAATACTACAATCTCACGGAGCTGACGAATGTTTCCAGCTTTGAGATCTTTTCCAGCGGCAATCCCCCTGCCCCCTGCCTGGCCCATCTCCACTGCCGACATGGCTTT…
21641	c_000000005466	1512	2487	f			ATGGGCAGTTTAAGTTTGCGGATGACAGCAAACGTACCGGCCATGGCAGACAATGGGCTCTTCGCTTTCAACAATAGCGATATCAATGTGGGCGACTGGTGGTATATGATTCAGGGAATTGTGGACTACCACAGCAGCGCTGGCTACAAGGTGAATCCCCGCAATCAATCGGACATGATAAAAACCGACGCTTTGGTCAATGCTTCCATCACCATCGAATCCAAGGAAGCTGAACTGAACAAGCTGGTTGACGTTGCCATGCTGACCTCCCATGTGAACCTCAACTGGTATGTGTCTTCCTATACCGCCTCTTTCAAGATAGACCCCACCAAGGTGCTTTTCCAGGGTATAAAATACGAGGACACCCTCTCCCGCCTTTGGGATGACGACGACAGCCTG…
21642	c_000000005466	2506	3043	f			ATGAAGAAAACAATAATACTTGCCGTCATCCTGTTTCAGGCGGCTTTGCTGCTTGCCGTATTTGATGACTACAATCCTTCCGCCAGGGCTCGCGGTATGGGCGGAGCCTACACCGGTGTGGCAGACGACGTCAATTCGATCTTTTACAATCCCGCGGGGCTGACCAACGTGAACATGGAAGCCATGATCGGCTTCAGCCAACTCAACAATCAGGAGTTCACCGAATTCAAGGCTGGCGCGGTTGGCATCAAGCTGCCCCAAAACCTCGGCACAGTGGCTTTGGGAGCAAGGCTCTTCGACGTGGACTTTGAGGAAGAGACCCTGATGAGCGAGCAGATTTGGAGCCTTTCCCACGCCTTCAGTCTGCAAAAGGACATCCATTCCCAGATCAGCGTGGGA…
21643	c_000000005466	3042	3348	f			ATGGGCAACAACAATCAAAACACCCTGCCCAGCAAACTGTCCCTGGGAGTATCCTACCTGCCCTATGACCAGGTGACCACCAGCATTGAAGTGCGCAAGGATTTTGGCCAGGAAACCGAGTTTATGGGCGGCGTGGAAGCCAAGATGCTGGAAATCCTCAGCCTCAGATTTGGCGTCCACCACAATCCCGCAACCTGGAACGCAGGGGTGGGGCTTGACGTTGAAGGCATCAAGATCGACTTTTCCTATTCCACTCACACGGTTTTGCCGGGAACCATATACGGCAACATCGGCTATAAATTTTAA
21644	c_000000005466	3362	3644	f			ATGGCTGGTTCAATGTTTAAGAAATTTATACCCGCTTTTATACCTCTGGCCTATGAACTGGTGCGCCAGGTAAGGAGAAACAGCAGTCACAACAGCGAGATCAAGAAATTCGACAAGGCTGGAGAACAACTGAATACGATCGAGCATCTGATCGTAAGGCTGGAAAAAAAGGTTCAATCCAACCGTGAAGAGATTAAAAGTTCCAGGATTCGCCTTAAGATCTGGTTGTGGATCAACTCAGCCTTGTTAATCGCTATCTTTGTAAAAGTATTCTTTTTCTAA
21645	c_000000005466	4105	4636	r	Beta-lactamase superfamily domain	PF12706	ATGAAACTGAGATATCTTGGCCATTCCGCTTTTGAGCTGCGCAGTGACTCTGGCCACACTGTCCTGATCGACCCCTGGCTGGACGACAATCCCCAGGCCACCGTCAAATCAGATTCAATAAACGCGGATTACATCGTGATCACCCACGCCCATTTTGACCATCTGGGAGACGCGGAGAAAATCGCCAGACGCTGCAACGCGGAGATCATCTGCGTTGTCGAATTGTGCAGCTATTTTGAAAACAAAGGGCTTAAAACTCATCCCCTGCAAATTGGAGGCTCCAAAAGCTTTCCCTTTGGCCGCGTGAAACTAACCATCGCCTGGCATGGCAGCCAGACGCCGGATGGGGCGTATGCCGGGCTTGCGGCGGGAGTATTGCTCTGGATGGATGGCGTCTGC…
21646	c_000000005466	4797	5889	f	ABC transporter transmembrane region	PF00664	ATGAGGCTGTTTGAAAAGCATTGCTTTTTGCGTGCGCCCTTGGCTCAATTGGATAGAGCATCTGACTACGGATCAGAAGGTTGGGGGTTCGAATCCCTCAGGGCGTGCCACAAATTTCTTGCCAGCATCCGCTGGCTTTTTTTATTGCACGAAGTTATGAGAAACAAAAGCACTACCCGGACAAAATGGAGCAATCTGATCCAAATCTACCGGATGATGTTCCGTTATTGGCACATCCTGTTGATGGGGCTGGTGGCGATGCTGCTTTACGCGCTGTTCAGCGGTATCAGTATTACCCTGGTTATCCCCTTGTTTGACTATGTTTTCAGGGCGAGTCCGGTACCGGTGCAATACCATGACGCGGGTGCGTTTATTCAAGAATTTCTGGGAAGAATAGGC…
21647	c_000000005466	5837	6239	f			ATGGAAAAGGCACAGTACTATACAACCCTCAATGTGCCAATCACAGAACTGAATACGGTGGCAATGGGTGTGGTGGTGATTATCCTGGGGGGGGAATTGATTCTCAGTCCCGGCAGCACCTTTTCCCTGGGAGATTTTACAGCCTTTCTCTTTGCCCTGTTTTCCATGCTGCATCCCCTGAAATCGCTTACGCAGATATATATCGAGATCAAAAAAGCACTGGTTTCGCTGGAACGCATATCTGATGTAATGAACCGCGAACCAACGGTGGTGGACGCTGTGGATGCCGTTGAGAAACATGGATTTGAAAAGAGTATCGAGTTCTCCAAGGTGAGTTTTTATTACGAGCCAGGCAAACCTGTGATACAAGATTTCGATTTGGTTATCCACAAGGGCGAA…
21676	c_000000005475	2	563	f	Vacuole effluxer Atg22 like	PF11700	AGGCTGTGGGGCCTGGCGGTGGGGCTTTCGATGACCCTGGTGGCGGTCACGGCTCCATTTTTGGGGGCGGTGGCAGACTTTTCCCGCTCCAAGAAGAAGATGCTTTTCTTTTTCGCGTGGACTACTGCCGCGGCTACATCCCTTCTCTATTTCGTCCGGGAAGGGGATGTTCTTGCCGGAATGCTCATCTTTATGGTCGCGAACTTCGCCTTTAACAGCGCCAATGTCTTCTATGACGCTTTCCTGCCTGAGTTGAGCACCCCGCAGGATATTGGCAAGATTTCCGGTTATGGCTGGGCTTTGGGCTATGTTGGCGGCCTGCTGTCTTTGATTCTGTCCCTGCTGCTTATCAAATATGATGTCAGACTGGTCTTTCCGATGATTGGCCTGCACATCTTT…
21677	c_000000005475	1106	1895	f	Bacterial extracellular solute-binding protein	PF13416	ATGAAGAACATTGCAAGATTAATGTTAATCGTGATCATGCTCATATTGTTGGCCGCCTGCGGCAAAAAGAGCAATGTGCTGTATGTATTCAACTGGTCCGACTATATCAATCCGGATCTTGTGAAACAATTTGAAGAGACTTACGATTGCGAGGTGAGGGAGAGCTATTTCGAATCCAATGAAAACATGCTCACCAAGATCGAAAGTTCCCGCCAAGCTTACGATATTATTGTCCCCAGCGGCGACCACGTTACTATTTTAGTACAAAAAGGCTTACTGGAACCACTTGATAAAAGTAAGCTGACCAACTATGGCAATCTCGACCCTCAACTGCTTCTCAAAGCTCAGTCATTCGATCCTGAAAACAAGTTTTCTGTTCCCTATTTCTGGGGTATCACA…
21678	c_000000005475	1879	2158	f	Bacterial extracellular solute-binding protein	PF13416	ATGGATAACATGGTGATCCTGAAATCATCTCAAAACAAAGAACTGGCCTACAAATTCATAGACTTCCTGCTGGAAGCAGAGAACGCCAAACTGAATGCTGAATACACCCAGTATCCCACTCCAAACAAAGCCGCTTACGACCATCTGGATGAAATTCAGAAGATGAATGAACTGATCTACCCCAGTCCTGAGTATCTGGAAAAATGCACCATGATCCAGTTTTTGGGAGAAAAGATCAGAGGTGTGGATGCCCTGTTTGAAAAAATCAGATTAAATTGA
21679	c_000000005475	2165	3752	f	tRNA synthetases class II (D, K and N)	PF00152	ATGTTTGACAACCTGAACCAGCTTCAACGTACAGATTATTGCGGAAACCTAAGTTCCGCCGATATAGGCAGGTCAGCCACCCTGATGGGTTGGGTGCACAAAAGACGTGATCTTGGCGGTCTCATCTTCATCGATCTGCGAGACGTAAGCGGTCTCTTTCAGATCGTTATCAGGCCGGAATCCAGTATCTTCCAAAAAGCCGAGCAGCTGCGCAACGAGTTTGTGATTGGCGTGAGTGGCGTGGTGGCGGCCAGAGATCAACACAATATTAATACTAAGATGAAGACTGGCGCTCTGGAGTTGATCGCGGAAGAATTGTGGGTGTTCAACGACTGTCTGCCCCTGCCGATCCAACTGAACGAAGCTGCCATGGCGGATGAAGACCTGCGCCTCACGTAT…
21680	c_000000005475	3912	4062	f			ATGGAAGGAACTGCATCTGAAACCTGGAGATTAGCCGTCCTGACCAGCGGCCACAGCCGCGGCTCCAATCTGCGTGCCCTGCATAACTACTTCAGCTCGCAGGACAAGAGGATCATGATTGTCTTTGTCACGGTTTCCCTGCCCTCGGCG
21935	c_000000005533	2	119	r			ATGTACCGAGAAATCTGTAGCAAATACGCTCCCGACAAAGACAACCTGATCTGCATCCTGCACGAGATCCAGAACAGCCATCCTCAGCATTACATCTCTGAGGAGGCTGTCCAGACC
21936	c_000000005533	128	1982	r	Respiratory-chain NADH dehydrogenase 51 Kd subunit	PF01512	ATGTCTTTGAAAAGAATTGACCTGCTGATCTGCTGTGGCTCAGGCTGTATATCGGCGGGCGCGCTGAAAATCAAGGAAAGGTTTCACGCTGTTCTCAGCGAGAAAGGCCTGACCAACGAAATCAATATTATCGAAACCGGCTGTATGGGTCCCTGTGACTACGGTCCGGTGATGGTTATCTATCCTGAAGGCATCTTCTACAAAAAAGTTACGCCGGAAGATGTGGATGAGATAGTAGCCGAGCACTTTGTGAAGGGACGCCCGGTCCAGCGGCTGATGCTGCAGGACGAAGATAAGACCATTGCCGCCCACAAGGAAGTACCGTTCTATCAGAAACAGGTTAAAGTGGCACTGGCCAACTGCGGCTTCATCGATCCGGAAAGCCTGGAAGAGTATATC…
21937	c_000000005533	2027	2360	r			ATGAAGACACTCGCAGACCTTAAAAAAATCCGTGAGAAAGCCCAGGAAGAAATGAAGCTTCGTGGCTCAAGCGTGCGCATCAAGATCGTTGTTGGGATGGGAACATCCGGCATCGCCATGGGCGCTCGTGAAGTCATGAAAACCTTCCTGGAAGAGATTTCGAACCGCAATCTGACTGATGTCATCGTGACTCAGACAGGGGAAAAAGGACTATCCTCACTGGAGCCGGTAGTGGATTTGATCGAAGAAGATAAACCCAAGGTCACCTATGGCAATATGACCCCCGACAAAGTAAAAAAGTGGTCGTGGAGCACATTGTTAACGGCAGGATAG
21938	c_000000005533	2359	2929	r	Histidine kinase-, DNA gyrase B-, and HSP90-like ATPase	PF02518	ATGCAAGACATTTCACTGCATCTGCTGGACATCATTGAAAACTCTGTCCGGGCTGCCGCGAAAAACATCAAGGTCCGTGTGATTAAAGACCACAAACAGAACCTATTGCGCGTCATTGTGGAAGATGATGGAGTTGGCATGGACACCGGAACCCTGGAGATGGCTCAGAATCCTTTCTATTCAAGCAAGGAAAAGCGGGCCAAAAAAGTGGGCTTGGGCATTCCACTGTTCAAGCAAAACGCGGAACTTGCCAACGGCTGTTTCAACATGACCAGCGAACCAGGCTTCGGGACCGTTCTGACAGCGGACTTTGAGCTTGATCACATCGACAGGATGCCTTTGGGTAATCTCAAAGACACTCTGCTGGGCGTCATTATCGGGCATCCGGATGTGGATTAT…
21939	c_000000005533	2942	3425	r	Thioredoxin-like [2Fe-2S] ferredoxin	PF01257	ATGAATCCCATTTCTCAACAAGACAACCTGCTATATGACAAACTGCGCGCTGTCATTGCAGAAAGAAAGAATCTGCGCAATCCGCTCATTGAGATCCTGCGCAATGCCCAGGAAATCTTTGGTTATCTGCCCATCGAGGTTCAGGAGTTCATTGCACAGGAAATGAACATTCCCGCCAGTAAAATTTACGGTGTGGTGACTTTTTACAATTTCTTTTCCATGAAACCCCGCGGAAAATATACCCTCAACATCTGCATGGGAACCGCCTGCTTCGTGAAAGGCGCGCCCCGCCTATTGCAGATGATCAGCGACGAGCTGGGGGTGGAAGTTGGCGAAACCACTTCCGACGGCCGCTTTACGGTTAGCGCGGTGCGTTGTGTGGGGGCTTGCTCTTTGGCT…
21940	c_000000005533	3447	3816	r			ATGGAACAAAGAGCCTTGCTCAATTCATCCATCTGGGATTTGAACACGTCCGTGGCAAAGGCAATGGAGTTTGGCGGATACTGCGTTCCGGCGCATATCGATGCTGAAGTAAACAGCATAATCGGTCAACTTGGCTTTCTGCCTGCGGAACCGGTCTTTCCCTTGTTGGGTATTAGTGCCGGGCTCAATTTGGAGCAGTATCTGTCCAAACATCCTGAACTGCGGGGGAAAGCCTTTCTGCGCTGTTCCGATGCCCACTATCTGAACGATCTGGGCAGCGGCAGCAGCAAGGTGTTCGCGCACGATGCCAGAGTATCCGAACTGGCCAAGGCAGCCCTCAACTTGGAAGAAAGAAGATTGTTAGTATAA
21941	c_000000005533	3845	4121	r			ATGGCCCCCAAAGCGCTGATAGGATGCCTGAAAAGCCTGGGGATAGATTGGATGGCGATTACAGACCACAACACTCTGGCAAACTGTCCGGCTTACGCTGCCGTTGCGGAGCGGGAAGGGGTCAGCTTTACCTGGGGTGTGGAAGTGCAGACCGCTGAAGAAATACATCTGCTGGTGTATTTTGACCAGCCAGACAAGGCGCAGGCATTTGGGGACGAGCTATACGAGTCGCTGCTGCCGCTGCCTAACGACCCTGATTTTTTGGGGATCAAGTAA
21942	c_000000005533	4526	5741	r	Iron only hydrogenase large subunit, C-terminal domain	PF02906	GTGCGCGACCGCAAGGCGAAGATCGATTCCCTGCGCTGCGTGGATTGCGGTAACTGCATCGAGGCCTGCGCCTTCCATGCCATCATACCCCGCAGTGATACTCTGGATGTGATTCACAACTTCAAATACAAGGTGGCTATTATTTCCACCTCATATTTTGGCCAGTTCACCGAGGATGTGTCCTATGAAGTGGCCAAACAGGCGCTTTATGAGCTGGGTTTTGACGATGTGCAGGAAGAGGCGATGGTGACCCAGTTTCAGGTGGAGATGATCCGCGATTATATCCGTGCCAATCGGGACAAAAGACCGATCCTGTCCAGCAACTGCCCCACTGTCGTGCGTCTGATCCAGCTCAAGTATCCGTCTCTGCTTTCCAATCTTTTCCAACTGGAAGCTCCG…
21943	c_000000005533	5837	6368	r	Histidine kinase-like ATPase domain	PF13581	ATGCGGGACTTCGCAGCTGCAAAATCTGAAATGGGCGAATACTGGTATATCCGGCCTGGCCTTGAGGAAAGCGTAAATGGCTTTTTCTCGGCTCAGCCCGAAGCAGACATGGCCTTGGAATCGCAGATACCGGAAAAGGATTTCAACCAGGCAGGCAAAGGCTCCGCTGAGGTGAAAAACTTGTTGAAACGCTTGGGCGTGAATCCCGGGATACTCAGAAGGGTGGCAGTTGCCGCCTATGAAGCGGAAATCAATGTGGCGGCGCATTCCCTGGGCGGAACGATGATGTGCCGAATCTATGATGAGTTTATACACATAATTTTCAAGGATATGGGTCCGGGTATTGCAGATATTGAACAAGCCATGACTCCGGGCTATTCCACAGCAGATGAGATGGTG…
21944	c_000000005533	6339	6687	r			ATGAAATTGAAAGAAATTGTGGCCATTCTGGATGGGGAGGTACTGCTCCCTGAGGTTGATTTGGAAATGGAGGTGCCCTGCGCCTTCTCGTCCGACCTGATCAGCGACATCCTGATGTGCACCAAGGAGCCTACCTTGTTGCTTACCGGGCTTACCAACAATCAGGTTATCCGCCTGTGTGACATGATCGACATCGTGGGCATTGTTTTTGTGCGGGGGAAACGGCCTTTGCAAGAGATCATCGATATGGCGAGAGAGCGCAATATCCCTCTGATCTGCACTAATTTTACCATGTACCGTTCCAGCGGTTTGCTTTTCAATGCGGGACTTCGCAGCTGCAAAATCTGA
22194	c_000000005606	2	101	r			ATGCTGGATATCAGCCTGATCGGTTACGGCAAGATGGGGCGGATGCTGCATGAGCTCGCTTCCAGCCACGGCTGCCGGGTTCAATCCATAGTCGATCCC
22195	c_000000005606	100	895	r	Peptidase dimerisation domain	PF07687	ATGGGTATCAAGTCCGCGCTGGAAAGCGGCGTGGATCATGCTCCCATCGAGGTTCTGTTCACGGTCTCGGAAGAGATCGGCCTCCTGGGCGCCAAGCATTTTGACAAAAGCAAGCTGCGTTCCGCCTTTGGCTACGCGATGGACGCCCACCGTGTGGGTGATCTGGTCTTGGGCGCGCCGGCGCAGAACTCGATCCGCATCACCATCCAGGGCAAGGAAGCCCATGCCGGAGTGGAGCCGGAGAACGGCATCAATGCCATCCGGGTGGCCTCCGAAGCCATCGCCGCCATGCCTCTGGGACGCATCGACTACGAAACCACCTGCAACATGGGCATCATCAGGGGAGGCACCGCCACCAACATCGTCCCCAATAAAGTGGAAATCTCCGGCGAAGCCCGC…
22196	c_000000005606	1369	2020	r	Methyltransferase domain	PF13649	ATGCCTCAAGATAACAGAACATCCGGCTTTTTCGACAGATACTCCGATGGATTTAACGCCATCTATGGCTCCCGCGACAACTTTTTCTGGAACTTCATCGACAAACACTTCCGCCAGACCATGCGCCTGCGTTTTGAGGCTGTGTTGGAAGAATGCGTTCCCGGGGACGATAAAACCGCTCTGGATGTTGGCTGTGGGCCCGGACACTATATGGTTGCGCTCATCAAGCGGGGGCTAAAGCATGTGCATGGATTGGACTTTGCCCCGCGTATGCTCGAGATTGCCAAAAAGCAAGCCACAGAAGCGGGTGTGATCGATCAGTGCAGTTATGAAACCGTCGATTTTCTCGAGCTGAATGAAGAGACCAAGTATAACTATGTGATTCTGATGGGTTTCATG…
22197	c_000000005606	2006	2864	r	Domain of unknown function (DUF3473)	PF11959	ATGCAAGCACATTTTACAATAGACGTGGAAGATTATTTCCATACCGTGGAGGGAGAGCATGTCCCGAAACTGGCGCAGTGGGACGCGTTGCCGACCCGCGTTGAGAAAAACACCCAAGTCCTTCTGGATATACTGGATGAACACAAAGTGAAGTCCACCTGCTTCGTCCTCGGTTACGTCGCGCGGAGGCATCCTGATCTGGTCAGGGAAATAGCTCGCCGCGGCCATGAAGTCGCCTCTCACGGGATGAATCACAAGCATGTATTTGAAATGGCTCCCGAAGAATTCGCCCAGGATTTGGAGACGAGCAAGAAGCTTTTGGAAGATATCTGCGGGATGGAGGTGTTGGGTTTTCGCAGCCCCGGTTTTTCCTACACGGACAGCTCTCCCTGGTTCTTT…
23136	c_000000005853	0	3816	f	Fibronectin type III domain	PF00041	ACTGGTTCGCTGCGCAATTTCCTATATGGAAGCGAGCCGAATGCCCAATATGACAACTGGATATCGCATCTGGCCGAGGGGGTAGCAAGTCCCAACTACAACACCTACGCCCCTTACGATGTGCAAACTAATGGTTTTGGGAACTTTCGCGTACCCAATGCCTCCGATATAATCTATTGGGGCAATATGCTCGACCTCTTTGTGGCGGGCGACTATGATGGCGCCCAAGGTGTTCTGGATGCAAATGCGTCTCCGTATCAGGTAGTTCAATTCAATGATACGGACACAGGCCGCACCTACTATATGATCCGCGAAATCCCCGATATGAGCTATTATGACGACAATGGTACGCCGGACGAAAATGATGACGAGCTGGGAGCTTTTACCTACGGCTGGGGT…
23137	c_000000005853	4229	5342	r			ATGAGAAAACTCATCTTAATCCTGCTCACTCTCGCGGCTTTCAATGTGCTGCTGGGAGTGGATTTCAGCTTCGACGGCGAAAACCGCACCCGCGCGGCCATCTACAACGACGACAAGGACTCACGGGGCAACCATGTGGACAACAAGCTGCTATTGGGCATGAACAGCGACCTCACCGATGAACTCAAACTGCGTGTCAACCTGCAGTTCGGAGATGTGGTGTGGGGCGGCAATAACGGCGGAGGAATAGCTGCCGGAGTTCCTGTCAGAGCCTATGAACTCTATATCGATTACCGCATCGAAGCCATCAAGTCCAATCTCAAAATCGGCCAACAATATTGGGCGGACCACCGCAGCCTTATGATCGACGACTCTTTTAGCGGAATCATGTTTTCCCAC…
23138	c_000000005853	5411	5564	r			ATGGACAACCTCCATCTGCTCCATCCCAATTATGGCTTCGACCGCCACAAAGGATATGGCACCCGGCTTCACCTGCAAGCCATCCGTGAGCACGGACCCTGCCCGCTCCACCGTTTCAGCTTCAGTCCAATCAGCGAATACCGCCAGAAATAA
23139	c_000000005853	5563	6646	r	Ribonuclease HII	PF01351	GAACTCGCCTGCGGAACGGCCAAAGCATCTGAGATCCTGGTTTGTAGAGGTTTGGAGGTGGATGCCTGCGACAGATCGCCTCACATGCTCCACGTTGCCGACGCCAAGCCCTGTAAACCGAATCTCTATTTGGCCTCGCTCACCGATCCCATTCCGGGACGCGATTACGACCTGATCTTTTGCCTTTTTGACAGTATCAACTATCTGACGCGCAAGGCGGAGATCAAGACTCTGCTCGACAACTGCGCATCCGCTCTACGCCCCGGTGGAATCTTCATCTTCGACATCTCTACCCTCATGAACAGCCTGCAAAACTTCGACGAAAGCGTGGCCTACACCAAGGTTGAGGACGGCTACATTATCCACGCTTCCGATTATGAAAGTCTTTCCAGGATGCAA…
23169	c_000000005863	2	458	f	PPIC-type PPIASE domain	PF13616	GACCTGGCGCGCCAATATTCCAACGATCCCGATGCTGCGGAGAATGGCGGCGTCCTGGGTGACTTTGCCGCCAACGAATTTCCCGAGCTTTTCGCCGGCCAGATCAATTCCTCGCCGGTGGGCGGCATCACCCCCGTGCTGGAAAACCAGGGCATACTCTACCTCTTTTCCCGCCTGGAAGAACTTCCCGCGCGCATCTTTGAATACGAGGAAGTGAAAGACAAAACTTCAGGACTACCTGCGCAGCACCAAGACCTTGCAGGCATACAATGTGTGGATCCAGGAACTGATGAAAGAGGCATACGTCCAGATAATCGAATGAGCGCGCGCAAACTTACCCCGGCAAGCTTTTTTCGCCTCCCTTTTCGGAGTGGGGTTCATCCCTTTTGCCCCGGGCAG…
23170	c_000000005863	454	814	f	Phosphatidylglycerophosphatase A	PF04608	TTGAAGGCTGGGGATGGGCGTGGTATTCTGCCGCTCTGCTGGCGCTTTGCGGCGTTTTCGGTCTGGTTGAGCGGCAAGGCGGAAAAGACCCTCGGGCACGACGCCCCCGCCATCGTGATCGACGAAGCCTGCGGTTTTTTTGTCACCGTCCTGCTGCTGCCCCGCACCCTGCCGGTGGCGATCTACGCCTTTGTGCTCTTCAGGGCTTTCGACATCGCCAAACCCTTTCCTGTCAACCACTCCCAGCGTCTGCCCGGCGGCTGGGGCATCACGGTTGACGATCTGCTCGCCGGGCTTTACGCAAACATCCTGATCAGGATATTACTGCATATTACGCCAAGATTCTTTGGTTTAGCATAA
23171	c_000000005863	1153	1723	f	Polypeptide deformylase	PF01327	ATGAAGAGAAAGCCCCGCCTCCTGCCCGTGCGCATCTACGGTGATGAGATCCTGCGCCTCAAAGCGCGGGAAATCAGCGCCCTCAGCCCGGAGCTGAAGGAGTTTATCGCCGACCTCACCCACACCATGTATCTCAGGGATGGCGTGGGCTTGGCGGCGCCGCAGGTGGGTGAAAGCCTGCGCGTCATCGTGATCGACCCCGATTGGTTCCGGGAGGGACGCCAAAAGAAGCCCCTCGTGATGATCAACCCCCGCATCATGGACGCAGAAGGGGAAACCGACACCGAGGAAGGCTGCATCAGCATCCCCGAGGTGTTTGCCCATGTCACCCGCCCCTCCCGCGTCACCCTTGTCTATCAGGATGTGGAGCTTGCCGAACGCCGCCTGGAGCTGGAAGGC…
23172	c_000000005863	1725	2688	f	Formyl transferase	PF00551	ATGCGCCTGATCTTTGCCGGCAGTTCCCAATTTGCGGTGCCAGCCCTGCGCGGGCTGCTGGAAGTCTCTCCGCCCGTGCTGGTGCTCAGCCGTCCGGAACGCCCCGCGGGACGCAATCTGAAGCCCCGTCTCTGTCCCCTGGCGGAGTTTGCCCAGAGCAAGGGCCTGCCCCTGTTCCAACCGGAGGATGTGAATTCGCCCGACTCCGTGCGGAGCATCCGCTCCCTGGAGGCTGACCTGCTCATCACCGCCTCCTATGGAGCCCTGCTGCGCAAGCCACTGCGGGAAAGCACCCGTCTGGGAGCCATAAATTTGCATCCCTCGCTGCTGCCCCTCCATCGCGGAGCGACCCCCGTGCAAAGCGCGCTGCTGAACGGCGACAGCCTCACGGGCACCACC…
23173	c_000000005863	2684	3440	f	Protein of unknown function DUF116	PF01976	ATGAAAGCACAAGAACAATATCTCTCCGTGATAAAATTCCCCTCCTTCGTCAGCCTGATGCTCATCATCCTGGGCCTGTTGCTGGCGTGGGTCATCTTCATCGCCTACCGGGGTATCTGGCCTGCCAAATGGGTCACCGCCGTGCTGGTCATCTGCTTTTTGACGATGGTCTTTATGGTGCTGATGTGGATAGTTACCCTGCGCTCCACCTACATCCGCATCCGCCCGCGCTGGCTGCAAAGGCTCAGTAAATGGATGCTGATCTACGTCTTTTACAACCTGGCCAACTTCTTCCGCATCATCACCTTTTCCAACCGCAACGTGCTCACCGAATCCTTCCTCAATTTCAACAACGAAACCGTCCTTACCGACCAGCTTGACGTGCGCAACTCCAACATC…
23174	c_000000005863	3449	4265	f	Trypsin-like peptidase domain	PF13365	ATGAAAGCTTCAACCATCGTCACCCTCGTGATAGTCGTCCTGCTGCTCAATGCCGGCATCACCCTGATGCTGATCAACGCCAAATCAAGTCCAGTCCAGACCGGAAGCTCCGCCCTGGTGAACGCCGCCCAAAACGAACGCGACACCCAGATCACCGCCGCCGTAAAAGCGGTGGAGGAAGCCGTGGTCAGCGTCAACGTTACCAAGGTGGAGGTTTTCAACCGTGGCTTTCGCGGCTTCGGCTTCTTTGATTTCTTCGGTTACCTGCCCACCGAACGCAAGGTGGAAAGCCTCGGCTCCGGCGTTATTTACGACCCCAGCGGCTTCATCGTCACCAACGCCCATGTGGTGACAGGTGCCCGGGAAATCACCGTGGTGCTGCCGGATAAAAGGGAGTTC…
23191	c_000000005869	2	851	f			CATTCACCTCAAAAGCTGAGCGGGGGATTTGTGATGAGAGCTTTGCCGCGTGTTTTATTCTGCTTGGCCATCGTCACCCTGGCCCTCGGGGCTTGCTCCGGCACCAGATTCCGCGCCTACAAAAGGATCGGCGGATTCAGGAAACTGGAGCCGATAACCCTGGAAGCCAACGCGGACAAGGCGGTGAGTTCGATGGGCGGCAGGCTGGTTTACACTTTTGGCAAAGCGAGCCAGGAAATATGCTTTTACCGGGATGGCAAACGGGTGAACACTCTGGGCGGCTTGGGCTTTGACAGAACGAGCTTTCAGCGGCTGAGCGACATCGGGGTGGATCAGGACGGGTCTCTATTGGCTTTGGATTCCGCCCTCAAGGTCATGCGCAAGTTTACCCCGGAAGGC…
23192	c_000000005869	825	2415	f	Carbon-nitrogen hydrolase	PF00795	ATGTGGGAGGTGAGCTTGCGCCGTAACGATCTGTTGCTGACTTTTTTAAGCGCGCTGCTACTGGCGGTGTCGCGTCTGCCCCTGCATCTGGGATGGCTGGTGTTCATCGCCTGGATTCCATTGCTGCAGGTCTTTGAGCGGGGGGTCGCAAAAGCCCGCCAACTGCTGCTGATGGGCTTCATTATGTCCCTGGTGTATGTGCTGATAGTTTTTTATTGGTTCGCGCTTGTCACCTTGCCCGGCTTGATCGGCATGGTGCTGCTCTATACCCTGGTCTATTACCTGCTTTTCCTGGCCATCAACCGCATTTTCCGCTCTCTCCCCGTCTGGCGTTACGCGGGCTTCATCTCGCTGCTGCTCACCTTTGAATGGGTGCAAAACTTTGGCGAGACCCGTTTC…
23193	c_000000005869	2411	2801	f	MerR HTH family regulatory protein	PF13411	GTGAAAAAGCATTATTACACCATCGGCGAAGTAAGCAACATCCTGGGCGTAAAACCTTACGTAATCCGCTATTGGGAGAGCGAGTTCAGCTTTCTCAAGCCCCGCAAGCAGGAGGGGCGAATCCGCAAGTATTCGGAAGACAACATCCTGCTGCTGAAAAAGATAAAGGACATGCTATACAACCAGCGCTTTACGATCGCGGGAGCCCGCCAGAAACTGAAGGCGGAACGTGCCGCGGCACGGCGCGGGGAAACCTTGCCCCAGGCAACACAGCCTCAGGCTCGGGACGAAGTCCTGTCAACCGAGTTGCAAGAGAATCTGCGGGAGCTGCGCGGCCAGCTTCTGGAGATGAGAACGCAGTGCCGCAAACTTCTGGGAAAGGAAAAATGA
23194	c_000000005869	3347	3638	f	Glycyl-tRNA synthetase alpha subunit	PF02091	ATGAAGAGCTCTTTTTTTGCCAAAGAGGTCGAGTATTCGGAATACAACTTCTCGGCGGCGGACACCGGCCTGCTCTTCAGCCTGTTCCAGAACTATGAAAAGGAGTGCCGCGAACTGCTCGCCAAGGCCCTCGTCTATCCGGCTTACGACAATCTGCTGCGCTGCTCCCACAACTTTAACCTGCTGGATGCCCGGGGCGTGATCAGCGTCACCGAAAGGGCTGCCTACATTGGCAGGATACGCAATCTTGCCCGCGAGACAGCCTCCGCCTATCTGGAAAAATATGCCTGA
23195	c_000000005869	3630	4110	f	N-formylglutamate amidohydrolase	PF05013	ATGCCTGACCGGGACCTGCTGATCTCGGTTTCTTCCTTTGGGGACGACTCCGTCCCGGTGCTGGCGACGGCCATCCACAACGGCCACTTCATGCCTGCCGAACTGCTGGCCAACTGCGGTGTCAGTGAAGCTGACCGGCTGCGGGAGGAAGACCCCCATACCGGCGAAATGGCTGCCCTGTTCCCCAATCACATCATCCTGAAAACCTCGCGTTTCGCGATCGACCTCAACAGGCCTTTGGAAAAGGCGGTATATCTGGAACCCGCTGATTGCTGGGGTTTGCCCGTGCGCTCCCGTCCCCTGGCGGATGATCTGCTGGCAAGCTTGAGGGAGGATTATGCCTCCTGGTACAAGCTGCTCCGCTATCACGTGGAAAGGCTGCTCGCGCGGCATCCCTTC…
23356	c_000000005917	0	1803	f	Chitobiase/beta-hexosaminidase C-terminal domain	PF13290	CCCAGCACCAGTTCCCCTCTGTATTCAGCGCCCATCCAACTCGAGCTCAATACCAACTATCAGGTACGGGTGCGGGCTTTTGCAACGGGTTGGGATCCAAGCCCAGTTTACTCGGCCAATTACCAGATCACCGGCACCGTTGAGATTCCAGAGCCTGTCTTTACTCCTGCGGCAGGAACATATACCAGCGAGATACAGGTGGTTCTTAACACACAGACACTGCCATCAGGGGCAACACTTCACTATACGATAAGCTCTGTGCCGGACGGGCAGGAACCAGATGAGGGGACTCCGGTTTATACCCAACCCATCCAGCTCTATTTGAACTCAAACAACTTCATTAAAGTAAAAGCTTTCAAAGCTGGCTGGACTCCCAGCCCAACCTATACAGCCCAATAC…
23357	c_000000005917	1799	2759	f			ATGAAAAGAAACTATATAAACAACTCCGTTCTTTGCATAGCGCTCTTGCTGCTTGTCCTGCCTTTGTTCGCTGCTGACATGAATAACTCCGGTGCGGCTTTTATCCGCATGGGAATCGGTGGCCGGGTGCTGGCCATGGGCGAGGCTGGAGCGGCGATCACAGACGACATCGGGTCAGTTTACTGGAATCCCGCCGGGCTTGCCCATCTGCGTGATTTTGAGGTGGGAACGACCTACAACTTCGGCCTCGATTTTGACCGCACCCACACCTTTGCCGCCTTCGGAACGCGCCTGCCCCTGGGCACGGTCGCCTTCTCATGGGTCAATGCTGCTGTGAGCGACATCGAAGGCTACGTGGATGCGGATACACCCACCGGCACTTTCTCCGACAGCGAACAT…
23358	c_000000005917	2814	3558	f	WD40-like Beta Propeller Repeat	PF07676	TTGTTGGCGGTGTTGGGAGCGGTGCCGGGCGAACGCTACGCGCGTGAAGGACTGGACCTCTTTCAAAGGGGTGAATATCAGCAGGCGTTGAACAAGTTTCTGGCTGCCGATCGTTCCGCCAATGGCACCGTGGCCGATTATCATTACTGGCTTGGCAAGCTCTACCTGGCTGTCGAGGACTCTGTCAACGCGAGGATCAGGATGCAGCGTTGCCAGCAGGCTGGCGAAAGCCGGTATCTGGAGGAAGCCAGGGAAATCGAACGCATCCTCACCCGCCAGCGCAGCATCTTCAGTAAAGCAAAACTGCGTCCCATGCCAGACCACTTTAACAGCCCCAATTCAGATTACGGGGCAGTGGTCTCCCCGGATGGCAAATACCTGTATTTCACATCCATGCGC…
23359	c_000000005917	3538	4750	f	OmpA family	PF00691	ATGGACATCTATGTATGTGAAAAAATTGGAGGACAATGGACAGAGCCGATCAATCTGGGCCCCGTCATCAACACCAGCGCCAACGAGCAGACTCCATTTTTGGATTTTGACGGCAAAACACTCTATTTTGCTTCCAACGGTCACGCCGGGTTTGGCGGATACGATATTTTCAGAGCCTATCGATTGGGTGCAGGCTGGCAAGATTGGTCTGTGCCCGATAATCTGGGAATGCCTTTCAATTCTGTGAACAATGACCGCTATTTTTACCGGATTCCCCTCAGCAATGAAGCCTACATCAGTTCAGACCGCAAATTGTCGGACTTTGAAAGCATCTACCATCTGACTCTGGAATACGCTTTGCCAGCCAGCTATCTGGTGAAGGATGCCAAATCCGGCCTG…
23360	c_000000005917	5354	6941	f	DNA gyrase B	PF00204	ATGACAGATAACAACTACACTGCAAGTAATATCAAGGTCCTCAAGGGCCTTGACGCGGTGCGTAAAAGACCGGCAATGTATATTGGCGGCACCAGCGAACGCGGTTTGCACCATCTTGTTTATGAAGTGGTGGATAACGCGATTGATGAAGCACTGGCAGGTTATTGCGACCAGATCAAGATAACCATCACCAACGAAGGAGAGGTCGAGGTCGATGACAATGGCCGCGGAATTCCGGTTGATATGCACAAGGAAATGAACATTCCCGCTGTCCAGGTGGTGATGACGGTACTGCATGCCGGAGGGAAGTTTGACAACAATTCCTACAAGGTATCCGGTGGATTGCATGGCGTGGGAGTATCGGTGGTGGTGGCACTCTCTGAGTATCTGGAAGTGCGC…
23361	c_000000005917	6955	7255	f	DNA gyrase B subunit, carboxyl terminus	PF00986	TTGGTGCGCAAAAACAAGCAGAAAAGATATGTGTTCACCGAGGAAGAGCGCGATGCCGCGATAGCGGAGTTTGGTGAAAAAGGGGTATTTGTCCAGCGCTACAAAGGATTGGGTGAGATGAACCCCGAACAGCTCTGGGAAACCACAATGAATCCTGAAACGCGCACGATGATCTCCGTGAAAGTGGACGACGCCATCGAGGCCGACCGCATCTTCACTATTCTGATGGGCGAAGAAGTGGAGCCGAGGCGTGAATTCATCCAGGCCAACGCCAAGTATGTGCAGAATCTTGATATTTAA
23362	c_000000005917	7273	7990	f	DNA gyrase/topoisomerase IV, subunit A	PF00521	ATGGACGACAAGACAAAGATCATAAATGTACAGATAGAAGACCAGATGCGCCGGGCTTACCTGGACTATTCCATGAGCGTTATAGTATCCAGGGCGCTGCCGGATATCCGGGATGGGGCTGAAGCCCTCTCAAAGACGTATCATATACGCATGCACGAGTTGAATCTCTCGCCTGGCGGGCACTTCCGCAAATGCGCCAAGATCGCTGGCGACACCTCTGGTAACTACCATCCCCACGGCGAACAGGTGGTGTATCCGACCCTGGTACGCCTTGCCCAGCCCTGGAATATGCGCTATCCGCTTATTGACGGACAGGGTAACTTCGGCTCCATCGATGGAGATCCGCCGGCGGCCATGCGTTACACTGAGGCGCGTCTGCAGAAAATAACCCCTGAAATG…
23363	c_000000005917	8013	9870	f	DNA gyrase/topoisomerase IV, subunit A	PF00521	GTGACCGGAGCCAACGAACAGGAATCCATCATCATCAGATCCATTCCCTATCAGGTTACCAAGACCCTGTTGATAGAAAAAATAGTGCAGTTGGTAAAAGACAAGAAGATTGAAGGTATCAGCGACGTCCGGGATGAATCCGGGCGGGATGGCATGCGGCTGGTGATCCATGTGAAGCGCAATCACGATGGCGCAACGGTGCGTAATCAGCTCTACAAATATACCCAGTTGCGTTCCACCTTTGGCGTGATCAATCTCTGCCTGGTGGATGGCGTGCCTCAGGTTGTAAGCATGAAGGACATGCTCAACAACTTTATAGAGTTCAGGCACGATGTGGTGTTGCGCCGTACCCTGTTTGAACTTAAAAACGCCCAGGACCGCCTACACATCCTCGAAGGC…
23364	c_000000005917	10088	10976	f	Polyprenyl synthetase	PF00348	TTGTTACTACAGAAGTACTTTGAGACCAGGCTGGGTAAGGTTGAAGCCAACCTCAAGCATTTCGTTGGGACAGCATCTGGACCAGCTAAAGAACTGAAGAAAGCCATGCGATACGCTGTCTTCAGCGGTGGAAAACGCTGGCGTCCGCTATTGTTACTGGCTGTGTATGAGATGCTGGCAGGCGCAAAGAAAGCAAAGGGATTCCAGGACGCGCTCCATGCAGCCACGGCGGTGGAACTGATACATAACGCGTCGATAGTGCACGATGATATGCCCATGGTTATGAACAGATCAGAGCGTCGCTCCAGTCCGGCTTTGCATCTGAAGTTTGACAATACTATCGGAATCCTTGCAGGAGACGCTTTGTACACCTTGGCTTTTGAGGTGCTGGGGTATATC…
23365	c_000000005917	10979	11771	f			ATGATCGATGTTCATTGTCATTTACTCCCCCAAATAGATGACGGTTCCGATAGTGCTGAGAAATCGCTTCAACAGATGAAGCTGATGGATGACGGGGGTATCACGGATGCTTTCCTAACTTCCCATTTTATGCGCGGTTTATACAAGTATGACCGCTCGGATTATGATGAGAAATTATCCGCCATGCAGACTAAGTGCGCGGAAAATGGTTTGAAGTTGCACCTGCATGCCGGATTCGAGATATTTGTCCAACCCAATATTCTGGCAGATATTGAGAAAAATAACCTGGTAATGGGCAACTCGCGGTATATAATGGTGGAATCCGACTTGAACGGGTTGCCGGAAGATTTTTACAATTACATCTTCCCCCTCCTGCGCAAAGGATACAAGCCGATTCTG…
23366	c_000000005917	11771	12599	f	NAD dependent epimerase/dehydratase family	PF01370	ATGCCGAGGCTCTTGATAACAGGGGTCACCGGCTTGATCGGCAGGTCGGTGTTGCGTTCGATTCTGGCCGAAAAACTGGACTCTGAAGTCACAGCTTTGGTGAGGCCGGGGACCGAAACCAAGCGTTATGCAGAATTCCAAAATGCCGTTGAGATTGTCAACCTGGATTTGGCTGATATCCCTGCCCTGAAGGATTACATCTGGAAGAATCGCTTTGATTGCATCCTTCATATCGGAGCGTTACGCGGAGGACGCAAGTTTTCACGCGATGAATATCTCAAAGCTAATCTGCATAGCACCGAGCAGTTTGCGGAGTACTGTCTGGAAAACCGCGCCAAGCTGATCTTCTGTTCTTCAGTGGGAGTTTTTGGAGCCATTCCCGAGGAATTGCCCGCCAAC…
23367	c_000000005917	12743	13601	f	Methyltransferase domain	PF08241	ATGGCCATTCCTATCATCAACGACTGGGAAAAATACTTCACAGATCCCCATGAGGGATTGGGTTCTTCATATGAGCGGGTGGTCATTAATGATCTGCTGAAAAGAACTGCTGATCGGTATGGGGTGAAAAGCGTTCTTGAATCCCCCTCTTTTGGATTTACCGGTATCAGTGGCATAAACTTGCTCTCTTTGGCTGATCTTGGCATTCGGGTCTATTTGGAAGACCACGACGAACGCAGGCTTGATCTGATCGGCAAGCTATGGAGTGAACTGGGGAGACCTCTGCAAACTGCTTATAACAGAGATTACCGCAAGTTGGACTATCCGGATTCCAGCATTGACATGTATTTCTCTTTTTCGGCGTTGTGGTTTGCGCAGGATTTGCCTTGCTTTTTGCGG…
23368	c_000000005917	13611	14601	f	Lysylphosphatidylglycerol synthase TM region	PF03706	ATGAAATTATCCCGCAAGCGTCTGCTGTCTTTGCTTCTGGGGCTTGCTGTCGGGCTGCTGTTGCTTGCTTTGTGGTTGAAGTATATCGATATCGACCTGCTGATACGCAAGATCGAGCAGGTGCGCTTGGAACTGGTGGTCTGGGCATCGCTTTTTTACCTGGGGGCTTACCTGATCCGCAGTCTGCGCTGGAATCTCCTCTTGCGAAAGGATGTGGCGCTTTCCTGGTGGCGCACTTGGCTCTACAGCATGGGAGGCAACTGGGTGAACTACGTTATTCCCATCCGATTGGGAGAATTGGTCAAGGCCTGGTTTGTCAAGCGCAACCATGGAGTTCCGATCCTGAGAGTCTTGCCGTCCATTTTCATAGATAAAACATTTGATACTGTGGGTATTTTC…
23369	c_000000005917	14615	14723	f			ATGAACAGTGAGACAATGATACAACAAATCACAGAGCTGAAGACGGCAAAAGAAGAACTGCTGAAGCAGATCAGGAAGACGATTATTGGCCAGGATAAAAGTGGTTGA
23443	c_000000005941	1	328	r			ATGCTCTGCGCGGATGTCTGCGTGGGCGATCAAAGCTCCATCCTGGCGGAATGCTGCGCTCTGGACAAGGGAATGGTGACCTTCAGGACTCCCCCCGCAGCCCGATCACTTGCCCAGATTGACGAACTCCTGGAGCGGATTTCTCTGCGCGTAAGCGGATTTGATGAACTCGAGCCCGCTTGCGAGCGGTTTTTGATTGATCCTTCCCTTCTGAGCCAGCAAAGGGCCGAGGCCAACAGATTGATGTTCGACACACTTGACGGCCAGGCTGGCAGCGCGCGGCCGCCGCGATCCTGGACTATTTACGGGAAAAGGGCTTCCAATGCT
23444	c_000000005941	351	1053	r			ATGGTCGGCTCAGAACTGCTCTACGCGCCAGTGTATGGAGCTATTTGGAAGCTTGCCGGGAAACTCGGCAGGCAGATACCACTGGCTTTCTATTGTCCGGAAGAGATTGACCTGCTGTGTTTTGAACCGGTGGCCAGATACCTGCCGCGGCTTGTTTACCTGAGCGGGGATCGCTCCATCCAGGCGGCTTTGACGCGCATGGGCCTGCCCAACCGCAATGCCCTGAGCTTCCCCCAGGCGTTGATCATGAGCCGGCATGCTCTGCACAGGTTTCCCTGCCGCAATATAATCAGCATCGGAATGAGGCATGGCCCCTACCACTTCAAGCGCATGACCAAAGCGGAGAACTACAACCGGTTCGGCCTTTATCTGTTCAGCAGCCGTGCCGACTTGGAGGCT…
23445	c_000000005941	1052	2090	r			TTGGAACTATATCTGCTCACCGGATACAACGGGTTTTATGGCCAGAGCCGCAAGCCCTGGGTTTCCCTCTCCACCCCAACGCTGATAAAGGAATTGCGGGTCTGCGGGCTGACAGTGCATACCGCGGACTGGCACGACCTGGCTTCCGGCAGTTTCAATCCCAGGGACTGCAATATCCTGTACACTTTCAGCCAGTTGACCCACATCCGGGACTGGCTCAAGGATCAGCTTCATTTTTTGGCGGAGCGCAACCGCCTCATCCCCTCGCTTCCCCTTCTGCTATGCCACGAAAACAAAGGCTATGCCTGGCTCTACCAGAAGAGCAAGGGCATCGATACTCCCCGGGCATGGTATCTTTGCGATCCGCGTGACATCCCGTCTGACCTGCCCTATCCGATC…
23446	c_000000005941	2290	2878	r	Glycosyl transferase family 2	PF00535	ATGTCTCTTGATCTGACCGCTTTCGTTCTCACCCAAAACAACATCCGCACCATTGCCGCCTGTCTGGACAGCCTCAGCTGGTGCGAGAATGTTGTGGTGATCGATTCCTTCAGTACCGATGGCACCCTTGAAGTTATTTCCCGTTATTCCAATGTACGCCTCTATCAGCATGATTATACAAACGCCCGTGAACAGCGCATTTGGGGTATGCCCCATGTTCTTACTAAATGGGTGTTTATTATTGATTCGGATGAGATTTGCCCTCCTGTGCTGCGGGATAAGATTATAGAGATAGTAAACAGCGGAGACGACACTTACGACGGTTATCTATTTCTCACCCGTACCCTGTTTATGGGAAAGCTGCTCAAGCACAGGGACTATCTCAGTAGCAGAGGGAAA…
23447	c_000000005941	2867	3365	r			ATGCTGGATTGCTTTAAAATGCTCACTGAGAGGGGATTTGTGATCCATGTCTATCCGATGCGCAACAAGAAGTACAAGAAGTACGCTGCTGTCAGAGGTGTTGTAATGCATGAAAAGCTACCGGCAAAACTCCTGATCAGGGAAATCAGCCAGTATCATTATGGCATAGCATTCCTGAACAGCAGTAGCGTCAGCGCAAAACGGAAGCAAGAAGTGAAATATGGCTTCTGGAACAAGCTGTTAGATTATATCGCTGCCGGTGTTCCCCCTATTACCTTTGAATATTATACAGACATGAGCAAGTTCATAGGCGATAATAAGATAGGCTTGGTTTTGCCGTCCATAGAGGATCTGACCAAGGAATCCCTTGGCAAAGTGGATTTATCATCCCTTAGAAAA…
23448	c_000000005941	3381	3963	r	Glycosyltransferase Family 4	PF13439	ATGAACGTCCTGTTTGTGCAAGATAGTTCGCCCTGCATTCGCAACATCAAGTATGCAGAGGCTTTGCAACAGATGGGGGTGAACGTGCATCTGCTGCATCGGGGGAAAACCCCACAGGAGGCTTATGGGTTTGGAAATGAATTCTATCAGTCGATATCAAGAATTGCAGACAATAGTACAAAAGCTGTTGAGCAGATAGCGAGGTTCTGCGAGTCTGAAGCGATTGATGTTCTGCACTATCACAATTACCCTGATAAGCTGTGTGCCAAGCTGTTGAAGTCAGGTATTAAAGTGCCTGTTGTATATGATCAGCACGACTTCATGTCGCAAAAGATGAGAAACTTCGGCTTCATCCGTAGCCACTATGAGAAGGTTTGCAACGAGAGAAATCATGGCGCG…
23449	c_000000005941	4046	4547	r	ABC transporter	PF00005	TTTGGGGTGGTTACGCAAGACAGCCTGCTGTTCACCAGGTCGCTGCGAGATAACATTGCGTATGGCAGCCTTGAACCTGTTTCCGATGAACAGCTCCGCCGCGCGGCTGAGATCGCCAACGCAGATGAGTTTATCCAGCAGTATCCGGGGCAATACGACGGTATCCTGCAATCCAAGGGCTCAAATCTTTCTGGCGGCCAACGGCAGCGGCTGTGCATCGCGCGTGCGATCGTAGGTGATCCGCCCATTCTGATCTTCGATGAAGCCACCAGCGCCCTCGATACTGAGAATGAACAGAAAGTGCAGCAGGCAATCGATGAAGCCACGCAAAACAGGACTGTCATCCTGATAGCGCACCGCCTGAGTACCATCCTCAAAGCAGATAAAATTGTGGTGATC…
23966	c_000000006083	36	819	f			TTGCGAGTAAAACTGAGCCTGTGCCTGTTTATCCTGTTGTGGGGGGTGTTGCCTGCCGCACCCCGGGCCTTGCTGTCTCCACAGGAGCTGGGGCAGATCGAGGAGATGCTCGGCACGGCCGGATTGCGGCGGGAGTCGCTGACTTTTGAAAAGGATTGGGATTTGGCTGCCAGGTTCAAGATGGATTGGCAGTTGCGCCAACTGCAGGATCCCTGGCGGGCACTGGACGATCTGGCTTCCCTGCGCGAAAGCTGCGCCCTGGAGGATGAAAGTGGTATTCCGGGTTTGCTGAACACCCTCGGCGGCATCGCTTTCAATCTGGATACGGATAATTATGCGAACATCTATAACGCGGCAAGCGAAAGATACATAAGCTCTTTCTCACGCCAGGTGCGCCGG…
23967	c_000000006083	793	1096	r			GTGGATGTTGATTCCCGCAAAAGCCGCGAAGGCGTAATCATCGGTCAGATACAGGTCATCGCCGGCGCCATCGAAGGAATAACCCAGGCCAAAGGCGCTGCGAAAGATCCCCGCCGGCTGCTGGTTCCGGTAGCTGTCATTGCCGTCAAAATCTGCCAGAATATAGAAGTTGTGCGCGTGGGAGGTGTTGAGACCGATCTCATAAACATCGTTGCCCGCGGGTTCCAGCAAAAGGCAGATTGGCGCGGAACCCAGTTCGGAGCTTCGATAATGGTCGTCACCCCCGGCTGCCGATCACCATAA
23968	c_000000006083	1173	2535	f			TTGGATGAAGCGGGCAACGCAGCTACGGCGCTCCGGTATCCGCCCAGGGAATCGGCAGCACCCGGGGGAGTGGGCGCTCTGCTGGATCAGGATGGAGCGGACAGCTACCTGCTTGGCGGCAAATACTTTCACGAACCTCTGATGCCGCTGGATTACATCACTTTGGGACAGGGCATGGGGATGGGCTTGCGGCCTGATCTGGCAGGCGGACTGGGCCTGCTTTACGACAAGGCGGGCAACGACCGCTATCTGGGTGGGGTTTATGCCCAGGGCTCAGGCTACTGGTATTCCGTGGGAGCCTTGCTGGATGAGGGCGGCAACGACGTGTACAACGCGGTTTACTATCCTCAGGGTTCCGGCATCCATCTCGCCTGTGGCTATCTGGTGGACGGCGGAGGA…
23969	c_000000006083	2531	2825	f	rRNA small subunit methyltransferase G	PF02527	ATGAGCCCGCAGCGGGAACTCTTTTCCGCTTTTCTGGTGGATCTGGGGCTTTCCGACCCCGCCGGGCTGCTCTCCCGTTTTGAGTTGTATCACTCTCTGCTGTTGGAGCTTAACGCGCGGGTGAACCTCTTTTCCCGCGGCACTGCTGCGGAAGACCTGTGGAGCAAGCATTTTCTTGACAGCCTGCTGCCCTTGAAAAGCTTTGACTTCAATGGGAAAGAGGTGCTTGATTTCGGTTCCGGCGAGGCCTGCCCGGCATACCGGTTAAGCTGGCGGTTCCTTCCTGTCGCATGA
23970	c_000000006083	2821	3160	f	rRNA small subunit methyltransferase G	PF02527	ATGACCTTGCTGGACTCGGTGCGCAAAAAGACCGTTGCCATGAAGGAAATGCTTGGCAGGTTAGAACTTGATTACTGCTCCGCGGTTTGGAGCCGGCTCGAGGACCTGCCCGCCCGTGGCCAGAGTTACGACATCATCCTCTGCCGGGCATTACGCCTCGAGGAGCGCTATCTGAAGCCCTTGCGCCTGCTCTTGCGGCCCGCGGGGCAGGTGCTCTTTTACAAAGCGCAGGATAGCTCCGATCTCAATCCCTACCGTCCGCGGGAACTCTGCCGGATGGAACTGGATTATGGCCGGCGGGTGATCTACACGCTGGACCGGGCCGCGCTGAATAAGTGA
23971	c_000000006083	3179	3941	f	AAA domain	PF13614	ATGGCAAGAGTAATTACGATCGTGAACCAGAAAGGCGGAGTGGGCAAGACCACTTCCGCGGTCAACCTGGCAGCCGCTTTGGCTGTGCTGGAAAAGAAGACCCTGCTGATCGACTTTGATCCCCAGGGCAACGCCACCAGCGGAGTGGGGCTGGATAAAGAAAAGCTTGATCTGCAGATCTACGACGCCCTGATCGGCAAAACCCCTCTACGGGAGGTAATCCAGGCCACCAGCACCCAAAACCTGTGGTGCGTGCCGGGCAATATCGACCTCACCGGAGCGGAGATCGAACTGGTGCACGAGTTTGCCCGCGAGCACAAGCTGCGTGAGGCTCTGCAACCGGTCCTGGACGATTTCGACTACATCCTGGTGGATTGCCCTCCTTCCCTGGGCCTGCTC…
23972	c_000000006083	3944	4664	f	ParB-like nuclease domain	PF02195	ATGATAAACGAACATCTTGGCCGCGGCCTCAGCGCTCTGATCCCGGATACGGAAGAGCGCAGCGATCCCCGTTCCAGCATCAGCACCCTGCCCATCGGCAGGATCAAAGCCAACCGCTGGCAGCCCCGCAAGAGCTTCGACGAAGCCAAGCTCCTGGAACTGGCTGAATCCATCAAAGCCAATGGCATCATCCAGCCGCTGATCGTCACCAAGACCGAAGGCTCGGATTACGAGCTGATCGCGGGGGAACGCCGCCTGCAGGCAGCCCGGCTGGCAGGTTTGGAAGCCGTGCCGGTGGTGATCCGCAGCGTGAGCGAGAAGGAGCAGTTGCAGCTTGCCATCGTGGAAAACGTGCAGCGCGAAGACCTCTCCCCGATCGAGGAAGCCAAGGCCTATCAG…
23973	c_000000006083	4805	4940	f	NAD dependent epimerase/dehydratase family	PF01370	ATGAAACGAATACTGGTAACAGGAGGAGCCGGCTTCATCGGCGCGAACTACATCCACCACCTGTTTGAAGACCCCGGCTTCGATGGCATGGTCTATAATGTGGACAAGCTTACCTACGCCGGCAATACCGACAGC
24039	c_000000006104	2	71	r			ATGAGGGGGATTGGTGTCATTTGCATCACCCTCCCAGACAGGGGTCTTCCGGCAGTCATCCTTAACCTG
24040	c_000000006104	332	1013	r	Type II restriction endonuclease, TdeIII	PF09520	ATGATTGAAGAGGATAAACAAATTGAATCCTGTATGGGACCTGCTGACATAGCGGCTACAAACTTCTCGGCTGATGTATTTATTCAAGATGACAGTATTGTTGCGATTGAACTGAAGACGGTCAATCCAAATTCTGGAGTGCTTAAAGAGGAGAAACATAAAATCCTCGAAGCAAAAGCTGTTTTACGGAGACTCTATCCAGACAAGAAAGTCTCATATTACATCGGATTCCCTTTTGACCCAACCGTGGTTGAGGGTGAAGACGAATGCAGCTTCGACAAAAAGAGGTTTTTGGCAAACATCGTTGAAGGCAACAAATACTTTCATAACGATGAAGTATTGATAGCCTCCGAGTTATGGGATCTGCTTTCAGGTGAAAAGAATACGATGCAGGAACTC…
24041	c_000000006104	1716	2967	r	DNA methylase	PF01555	GTGGATCAAGCATCCAAACTAATCAATGTGAAAGACGCAAGTCTCTGGGCCAGTAAACACTTAGGAAAGCATGTATCAGTGTCTAACATTAGCTATCTTATCCAATATGGCCGTATAAAGAAATACTCTGAAAATGGCAGCACATTGGTTTCCAAACAAGAACTTGAGGACTATTACAAGTCTTACAATGGCAGTCGGGAAATATCGTGGCGAAACCAATTGGGAGACGATCTCAACTGGGCATTGTCATTTGATAACTACAAAGAAGCTGAAACCACAAAGCACGTCCATAGGCTTCATCCCTATAAAGGAAAGTTTATTCCCCAATTGGTTGAGTATTTCCTTGATTCTCACACTGACAACTTCAAGCATGAGGTTTTTTTCAAACCCGGCGACCTT…
24042	c_000000006104	3087	3234	f			ATGTTTACTATCAAGATGATATCGATTTCTTACAAGTTAAATACGCTTATAGATATGATTCTAAAACCCACACGGAAGCAAATCATGGGAAAAGACGCCCTGACCTCTTCCGGACAGGATGTCAAAATGAGGATTGTAAGTTCATAA
24043	c_000000006104	3382	3721	f			ATGCTATACTATCTGCTAAAGGTACTCATTTCAGCGGGATTGATCGTGCTGGTGAGCGAAATCTCCAAGCGCAGCAGCCTGGCGGGGGCGATTCTTGCCTCTGTGCCTCTGGTTTCCTTCCTGGCCATCCTGTGGATGTATCTGGAGACCAGGGATGTGAAACAGATCGCGGCGCTGTCCACGGATATATTCTGGCTGGTGTTGCCGTCCCTGCTGTTCTTTGTACTCTTTCCCCTGCTGTTGAGGCGCAACGTCAATTTCTACCTGGCTTTCGGGCTATCCGCGGCGCTCATGGTGGGATGCTATATTTTCACCACCTGGCTGCTCAAGCTGAGATGA
24044	c_000000006104	3926	4379	r	AIR carboxylase	PF00731	ATGCCCGCGGTGCGAGTTATTTTGGGCAGCAAGAGCGATTTTGCCGCCGCCGAGACTATCGGCCAGACCCTGGCGGAATTTGGGGTGGAGCATGACCTGCACATCTCCTCCGCCCACCGCAAACCGGAAAACACCGCCGCCCTGGCCAAAAACGCCGAGGCGGAAGGGGTGAAGGTGATAATCGCCGTGGCAGGCATGGCAGCCCATCTGCCGGGAGTGATCGCCTCCCACACCGCGTTGCCCGTGATCGGGGTACCCCTGGCCAGTGGAGGACTGGGCGGAATGGACGCCCTGCTTTCTATTGCCCAGATGCCCCCGGGCGTTCCGGTGGCCTGTGTGGCCATCGGCGGAGCCAAAAACGCAGCCCTGCTCGCCATCCAGATCCTCGCGCTGAACGAC…
24045	c_000000006104	4381	5056	r	Phosphoenolpyruvate-dependent sugar phosphotransferase system, EIIA 2	PF00359	ATGGCGAAGAAATATCTGTCCAAGGCAGACGCGGCCAAAAAACTCAAGGTTTCCGAGCGCGTTATCGTGGAAATGATCAACAGCGAAGTCTTTGAGACCAAGCTGGTGGGAAAGAACGTCAAGATCGACGAAGACTCCCTCAACGCGTGGCTGGACAACCTCAATGAAGTGGATGAGAAACTGCTTGCGCTCAAGCGCGTTATCTGCCACTTTGAAGAGTATATGCGGCCGGAAAACATCTTTTTGGATTTTACGGCGGAAAACAAATACGACGCTATCCGCATCCTCAGCGAGAAGGCCAAGCAGCTCAAGCTGGTGCGTGACGCCCGCTGGCTCTACGAAGTGGTGGTTGCCCGCGAGGAGCTGATCTCCACCGCCATCGGCCACGGCGTGGCGCTG…
24046	c_000000006104	5151	5652	f	Lipopolysaccharide-assembly	PF04390	ATGGTCAAGTTATTTATTCGTCTGGCGCTGCTCTGCGTGGTACTTTCAGGTTGCTCATATTCCGTCTATTCAAATGCTTACCCGCATTTGAAAAAAGTTGCCGTGCGCGCTTTTGAGAACCGCTCGGCGGACTATGACCTGGGCGACAAACTGCTGAATGGCCTCTCCCAGGAGTTTGCCAACGACGGCCGCCTCAAGCTGGTCACCCAACAGCCGGACTGCACCTTGGAAGGCAGCATCAACAGCTTTGAGGAAAACATCTACAGCTATGACGCCGCCAACAACGTGCAGGACTATCAGTTGCGCCTGGTCTGCAGCGTCACCTTCACCGACCTGATCAACAACCAGGTGATCTGGGAAAACAAAGCCCTGCAGGTCACCTGCAACTATGCCGTATCC…
24047	c_000000006104	5593	6418	f	RNA pseudouridylate synthase	PF00849	ATGAGCTCATCTCCCTACTCTTCAAAGCCATCATCCAAAACACCCTCGAAACCTGGTAAGGCTTTGCGCCTTAACCGCTTTCTGGCCGAATGCGGCCTGGGTTCGCGCCGGAGGGTGGAAGAGCTGGTGCTGGACGGGCGCATCCTGGTGAACGGCGAGGTCTGCCGCGACCTTAGCTGCCAGGTGAATCCCCAGGCGGACGAAGTGGCGCTGAAAGGCAAGGGCGTACTCTCCCTTCCCACGGAACAGCAATATCTGATGCTGAACAAGCCGCGCGGCTACGTGGTGACCGCCCGGGACGAATTCAGGCGCCAGACCATCTATGACTTGCTGCCGGAGCGGGCTTCCAAGCTGCGTTACGCAGGCAGGCTGGACAAGGATTCCGAAGGTCTGCTGCTG…
24048	c_000000006104	6380	6764	f	50S ribosome-binding GTPase	PF01926	ATGAAAATAGCACTGCTCGGCCTGCCCAAAAGCGGTAAGACCACAATCTTCAACGCCCTAACCCGCGGCAACGCCTCCACGGACAAATACGCCCCGCCTGCCCACGAAGCCAACGTGGGAGTGGTGCAGGTGCTGGATGAGCGCATCACCCGCCTGAGCGAACTCTATAAACCCAAAAAGACCATCTATGCTCATATAGAATACCGGGATTACCCCGGCATCTTCTCTTCCCGCGCGGAAATCCGGACAACGCGCTGTTTTCGGATATCAAAGCCTGCGAAGGCTTCGCCCTGGTGCTGCGCGCCTTCGCGGACGAAGAACTGGACGGCCTCTACGGCCCCGCCGACCCCCTGCGCCAACTGGGCGAATTTGAGGACGAGATGA
24049	c_000000006104	6760	7456	f	Protein of unknown function (DUF933)	PF06071	ATGATCATCAGCGACCTCATCGTGGCCGAAAAACGCCTGGAAAAGATCGAACTGGGCTACAAGCGCGGGGTGAAGACCCCCGCCATCCAGTTTGAGGAAAAGGTGCTGCGCGCCTCCTGTGAACACCTGCAGGACAACCTCCCCCTGCGCGGCCTGCAACTGTATCCCGAAGAGGAAAAAGTCCTGCGCGGCTTCCGCTTTTTCAGCCAGAATCCGCTGCTGGTTCTCATCAATGTGTCCGAAGACGAATATACCGCCCATGATGACCTGAAAACCCAGATCGCTGCCCGCGGTCACACCGTGGAGGTGATCGCCGGACGCTTTGAGGAGGAACTCAGCAAGCTGGATGAGGAGGAAGCAGCCGCCTTCATGGAAGACATGGGCATCGGCGAAAGCATC…
24050	c_000000006104	7465	8212	f			ATGGCAAGCCGCGGTAACAGCAAAACACGCTCCAGACGACAGTCTTTCAAGGCCTGGCACAAGCGCCTGATCGCCGGAGCGCTCACCCTGCTCAGCCTGCTTGTCTTCCTTTCCCTCATCTATGGCAAGGAATCCATCCTGCGGGACTACCAGCAGCTCAGCTACAGCGGCCACATGCTGAGCTGGTTTTTCCAGCCCTACCTGCAGACCGCCAACCTGATCGGCGTGTTTGGCGCGGTGATCAGCTATATCTTGCTTTATCTTTTCGGCTACTGGCTGTCGCTCCTGGGTTCGCTGCTGCTGCTGGTGGTCTCGCTGCAATACTTTTTGGAGCCCGAAGCCCATCACGGGCGGCAAAAGAGCTATTTGCTGCTCATCACCGCCTTTTTGCTGCAAATC…
24051	c_000000006104	8273	9704	f	FtsK/SpoIIIE family	PF01580	ATGCCCTCCATCGAAGACTTTTTGGAAAGCCCCGTCAAGCTTTCAGATCGCGACCGCAAGGAGATCGAGAGCCAAATCCTGGAAACCAGCCAGATCCTCAAGAACAAGCTGGCGGAGTTTGGCATCGAAGCCGAGGTGCGCAACGTCAATATCGGCCCCATTATCACCCAATACGAGCTGGAACCTGCCAAAGGGGTCAAGGTGAGCCGCTTTACCTCCCTGGCGGACGACCTCGCCCTGGCCATCAAGGCCAAGAGCATCCGCGTGCAGGCGCCCATCCCCGGCCGCGGCCTGATCGGCATCGAGATTCCCAACCTCACCCGGGATATGATCTATCTGCGCGACCTCCTGCTCTGCGAGGAAATGCGTAACAACAAGAACAAGCTGGTCTTCGGACTG…
24052	c_000000006104	9815	10427	f	Outer membrane lipoprotein carrier protein LolA	PF03548	ATGACCGCCCTGCTGGCGTGCCTGTTGCTGCTTGGCAGCCTGCAGGCGGCTGTGAGCCAGGCTCAGCTCTATCAGAAGATGCGCGCCGCCTATGGTTCGCTCAAGACCTATCAGGCGGAGCTGAGCCAGAGCAACTACTATCCCCAGCTTAAACGCACCATCAGCTACAACGGGAAGATCTACTTCACTCCCGGGCGCATGCTGATGAGCTTTTCCAGCCCCTCGGTGCAGCGCCTGCAGATTCGGGACGGCCAGGTGGAGCTTTACGACGCGGCCTCCAAGACCCTGCTCCGCGCGCCCATGCAGCCGGAATTTGGCAAGATGAACCCGGTGGAGATACTTGACCTCTACTGGCAGAAATCGCGGGTCTCCGTCACCAGCGAAACCAAGAGCCAGGCC…
24053	c_000000006104	10541	11495	f	Nucleotidyl transferase	PF00483	ATGCTCCAGCTCACCTTTGACCGCCTGGAAGCCCAAATCCCCGCCCACAAGATCTACGTGGTGACCGCCGGAAGCCAGGCGCAACTGGTGCGCGAACACCTGCCCCAACTGCCCCCCGAAAACATCATCATCGAACCCTTTGGCATGAACACCGCCCCCTGCATCGCCCTCAGCGCCGCGCATCTGGCAACCATCTATCCACAAGAGGAAGCCATGCTGGTGCTGCCCGCGGATCACGTGATCCTGGACGTCCCCGCCTTTCTCCGCAGCGTGAACCTGGCGGAAAAGGTGGCGCGGCAAGGGGCTTTGGTCACCTTCGGCATCGTGCCGGAGTATCCCGCTACCGGCTATGGCTACATCGAAGCGGGGGAAGAACTTGAGCCGGGTGTGAGGAAGGTC…
24054	c_000000006104	11491	12028	f	4Fe-4S binding domain	PF00037	TTGAATAGATTATTTTTTACAGCCCTGCTGGCTCTGCTGGCCTGCCTGGCCTGGGCTGGATTCGACCCCGATACGGAACTCTCCAGCTACCGCGGCGTGATCGAACTGCGCGGCAGCCAGACCTGGCTGCTGGATGATTCCGGCGACGGCCTGCGCCTATTGCTTGCCCCGCGCGGCCTGCTGGACAGCCTGGGGCTGCATCTGGCGGAGGGCGACACTGTCGCGGTGGAAGGCTGGCGCAAGAATGAGCTCTTTTTAGTGGGCAGGCTATGGCAGGAAGCGGACGATTCCAACCCCTGGCTGCTCCGAAACTTGGACGAAGCTTCGCTGCAAACAGGCGGCGTGTCTGATTACCGGGTGAACGGCGGAAAGTGCATCGGCTGCAAGCTCTGCGTTTCC…
24055	c_000000006104	12049	12226	f	EamA-like transporter family	PF00892	ATGAAGCAGTGGACGATTTACCTGCGGGCGGTGCTGGCCATGCTCTTTTGGGCGGTCACCTTTGTCTGGATCAAGGTGGCGTTGGTCACCTACCGTCCTTACGAGATCGTCTTTTTGCGCCTGCTGCTGGCCTCCGTGCTGCTGTTTGGGGTGACGCGCCTTTTTTCGCCAGAGTGA
24056	c_000000006104	12257	12563	f	EamA-like transporter family	PF00892	ATGCTGGTGGCTTTCTGCGAGCCTTTCATGTATTTCATCGGCGAGGCCAATGGGATGCAATATGTGTCCCCGACCCTGGGCTCGCTGATCATCTCCACCATCCCGCTGGTGAGCGCGCTGGGCGCCTGGATATTCCTCAAGGAAAGGATTTACCCCCTGCTGATCGTGGGGCTGCTGGTCTCTTTCTCCGGCGTGGCGCTGCTCAGTTTTGCCGAGCCGACCTCCACGGAACCCTCAAAGGCGTGCTGCTGCTCATGGTGGCGGTCTTTTCCGGGATGTTCTACGGCATCACGGTGCGGCGCATGA
24057	c_000000006104	12614	12974	f	EamA-like transporter family	PF00892	ATGCTCTATATGCTGCCCCTTTTCCTCTACTTCGACCTGGGGCATTTCCTCACCGTGCGCCATTCCGCAGTGGGCCTGCTCACCATCGCCGCCATGAGCGTTTTCGCCAGCGTGGGCGCTTTCTTGCTCTACACCGGAGTTATCCGCGAGCTTGGCCTGATCCGCTCCAACGTCTTTACCAACCTCATCCCGGTCTTCACCGTGTTCCTGGCCTTTTTCATACTGGGCGAACGCCTCAGCCTCCGGGGCGCGGCGGGAGTTACGCTCACCGTGCTGGGGCTGCTGATCTCTCAATCCCACGATCTGCGGCAGTTGCGGCGCAAGAGATTGAGCAAAAATCTTTCCCAAAGTGGAATGTAA
24058	c_000000006104	13021	13954	f	Disulphide bond corrector protein DsbC	PF11412	ATGAGTTCAACTGTCAAACATACTTTGCTTTGCGCCTTGCTGCTCCTGGTTTTGGCGACCGCCGCCGGGCAGACCCTGCGCTTTTCGGTGAGCCCCTCCGAGCTTAAACCGGGAGACAAGGGAATGCTGCGCGCCACGGTCTCCTTCCCGGATTCCATGAAGCAATCCTACGACCCCTCCGAGGGGGAATCGCCCTATTTCTTCCTCAGCGGAGACAGCCCCGCTCTCAGTTTTGGCAAGCTGAGCTACCCCAAGCCGACCAAGGTATCCTCCGATGGCTTCTGGGTTTACCACAACAGCGTGACCCTCAGCCTGCCCTTCACCGTGAAGGCCAATGCCAAGCCGGGCAAAGTAGCTGTCAATGCGACCTTTGGCTACAACCTCTGCCACAAGACCACC…
24059	c_000000006104	14041	14878	f	Thioredoxin-like	PF13899	ATGGGCCCCTTCATGGGCCCGGCGCTTGAAGTGGCCGTGCGCCTCTCCTCTCCGCTGCTGATGATCTTCTTTTTGCTCATCGGCTTTGGCTTTGCCCTGCCCTTCATCCTGATCAGCCTCTTCCCCAAAGCGCTCAAGCTGATCCCCAAACCGGGCGAATGGATGAATATCTTCAAGGAAGTGATGGGCTTTCTGTTACTGCTGCTGACCTGGAAATACTTCAGCAACATCTGGGGCCTCACCAAAAGCGGAGTTTACCTGCTGGACACCGCCCACTTCGTGGTCTTCCTCGGCTTCGCGGCCTGGCTCTACGGGCGTTTTGTGCGCATGGAAAACAGCAAGGCCGTGCAATATATCTTCACCCTGCTGACCATCGCGGTGATCGTGTTTGCCGCCTGG…
24060	c_000000006104	14874	15096	f			ATGAGACTTAGAATAATCCTTATCCTGCTGTCCCTCACAGCTTTACTGCTGTTGGGCTGCGACCGTTTTGAACGCGAGCTGGTGCAACCTTTCCAGCCCGCCAACTTCTCCGCCGGGCTTTTCACTCCCCTGGGCGATTCTTTACAGGTGGCATCCGCCGACAACCTCGCTCCGGTGAAACACTTCTTTTCCCCTTATTACCTGCACTCCGGCAGCACCCGC
24112	c_000000006115	2	413	r			ATGTGGGTACTGGTGCCCGACACCATTCCCGAAAGTGTGATCGAAGGCGGCCTCAGCTATGCCCAGAGCGATTCCCACATCCGCATCAACGCCCCCGCCAATGAAGGAGCGATGGTCACCGGAACCAAAAACGGGGTGGATTTCACCCACGCCAAGGTCCAAAACGGATTAGCCATCCTGCCCATCGATCCCGAAGCGGGCGGAGATCTGAAGATCACGGTTTCCCAGCCCAACTTCGTTCCCCTGGTGCGCACCCTCAGTCCCAGCGAACCCGTGGGGATCGGCATCATTGCCAACGATCTGGATGGAACGATTCTGAATCCCAACCAAACCGTCACCGCGCATCTGACCCTCAAAAACTACAGCGAGGCGCCCCTCACCCTCTCCAGCCTTGCCATC…
24113	c_000000006115	373	1990	r	Peptidase family C25	PF01364	ATGAGATATCTCATAATAACGATTATCTTGCTGTCCCTAAGCTTCTTAGGCGCGGCTATAAATGAAAGATACCTGACGAACGCGGCTGGAGTAAGCGCGAGCCTGGCCAACATCAGGCAGGCGCCAATGACAGTGTCTGCCGATCCGGACGATGAATTTCCGGATACCGGAACGATTTCCCGAACCTTTGCCCTGCCGTTCCAGAACGCCCAACTGACGGTGCAATCCCTGCGCTGGAACGTTTTTGACCAACAAGGCAACTTTCTCTACGAAGAGCAAAACAGAAACTCGGAAGCCCTGAGCCTGGGCAACAGCTTCACTTTCCGCGAGATGAGAGGCTTCACCGTGCTGATCCGCTCTCAGATAGAGGTTGAGGATCGTATCCTCACGCTCACGGAG…
24114	c_000000006115	2106	3051	f	Endonuclease/Exonuclease/phosphatase family	PF03372	ATGAAGAAAGGAATTGAAATGCGGAAATTCTTATATACTGGATTGGTTGTACTGGCAGCCTTGCTGGCTTTCTCCTGTGGAACCACGGAGTTTACCAATCCGAATACTCCCAATGTAAATCCGGACGCGAACCTGTTGTTTGGTTCGGATGACAGTTTTGACGTTGTGACTTGGAACCTGAGGACCTTCCCGCTGGCAGACCCCGCTACCAGCGAACTCCTGGCGCTGATTATACCCAAGCTGAAGGTGGATGTTATCGCCTGCCAGGAGATCATGAGCTACGGCGATTTTATCGAGCTGGCGGAGATGATTCCCCATTTCGAGGCCCGCGTGTCCAATGTGAGCAACAGCTATCTGCTGGCCTATCTTTACGATACCAGGACAGTGGAAGTCAACTCC…
24887	c_000000006329	0	519	r	Mur ligase middle domain	PF08245	ATGACCGTACTAATCCTGGCAACGGTGCTGCTTATTCTGCACTGGATATTCGAGTACCGGAGGCACAAGCGCAATGTGGAGGCCATTCCAATCCGGGTCCACGTTAACGGCACACGGGGAAAATCCAGCGTCACAAGGCTGATCGCTGCAGGACTGCGGGCTGGCGGACGCAAGACCGTGGCCAAGATCACGGGCACTCTGCCCAGAGTTGTCCTGCCTGACGGACGGGAAGCGGCAATCGTGCGCTTGATGGGTGCCAACATTATCGAGCAGAAGTATATCTTCCGCCATGCCGTATCCTATAACCCTGACGCCATTGTGATCGAGTGCATGGCGGTTAATCCCGTCTTCCAATGGATCACAGAGCGCAAGTTTGTGCGCAGCACTATTGCGGTGATC…
24888	c_000000006329	767	1184	r			ATGAACAAAACAAAGATAATATCCATTATAGTCGGCGCTATCGGCCTCTTGGTGGCCCTCTTCTTTGGGGTCAATATCAACGGGGAAAAGAATACCAATCAACAGTTTGTGGGTAATGAAGCCATGCAGCAGTTGATGACGACCAGCAATCTGGCTGGAAATCTGACCAATCAGAACTACACGGTCTATGTCACCAAATCAGGCAAGAAATACCACACCGAAAACTGCCGTTATGTATTGGGTAAACGCGTATCCATTAACCGCCTGGATGCCATTGACTCCGGTTATGAACCCTGCAAGAGATGCTACCCGGACGGCAGGAACACCCCGCCAATTCCTCAACAGCAAAAGGAAAAACAGAGAGAGACCCAGCCGCCGCAGAGTACAACACCGATGGAC…
24889	c_000000006329	1576	2380	r	Binding-protein-dependent transport system inner membrane component	PF00528	ATGCTAAGTATGTCGCGCATCACCAAGTTTTACAAAGGGATGAACCTCACCCTGTTCACCTTCGTGATAGTCTTTCTCTACATCCCCATCGCGATCCTGGTTATCTTCAGTTTCAACGACGCGAAAATAATCACCACCTGGAAAGGCTTCACCCTCAAGTATTACCAGCAACTGCTGCAAAACGACAACATCATCGAAGCTTTCAAGAACACCATGCTGATCGCCGGGCTGTCCACCCTCATATCCACCCTGATCGGGGTGCTCACGGCGCTGGGACTGGAGAACAAGCACTTCAAAGGCAGAAACCATCTGCTTGCCCTCATCTATGTGCCGCTGGTAATTCCTGACATCCTGATGGGCGTGTCCCTGGCTCTGCTCTTTAACTTCACCCGGGTCAAC…
24890	c_000000006329	2379	3285	r	Binding-protein-dependent transport system inner membrane component	PF00528	ATGAATCTCGAAGCCTTCAAGCAGGTAAATTGCTCACAGACCAAAGCCTCCCGCAGGCGCGACCTCGCCAGCTATCTTCTCACCGCGCCCGCCCTGATCTGGCTGCTTGTCTTTTTCCTGGTTCCCTATCTGATAGTGTTTATCTACAGCTTTCTTTCCACCGATATCTACGATGTCAGTTTCAAGTTTTCCCTCAGTGCCTATCGACAACTCTTCAGCGGTATCTATCTGCGCCCCTTTTATCTCGCTTTCCGCCTGGCCTTTATCACCACCTTTGCCTGCCTGATCCTGGCTTTCCCGGTGGCCTACTACATCGCCCGGGCAAGCGAAAAAAATGCGCAACATGCTGCTGATCCTGATTATCATCCCCTTTTGGACCAACCTGATCATCCGCATCTT…
24891	c_000000006329	3281	4463	r	ABC transporter	PF00005	TTGGACGAACTTCGTATAGAAAACCTGAGCAAGGATTATGACGGCTTTCTGGCTGTCGATAATGTTAGTCTCACCATTCAACCTGGGGAGCTTTATTCCTTCCTGGGTCCCAGTGGCTGTGGTAAAACCACGCTTCTGCGCATGATTGCCGGATTTGAAATCCCTCGCACGGGACGCATTTATCTGGGCGGGCAGGATATCACAGATCTGCCCCCTTACAAGCGTCCGGTAAACACGATCTTTCAAAACTACTCGCTGTTCCCCCACATGAACGTCTTCGACAATGTGGCTTTCGGACTGCGCATCAAGAAGGTGCCCAAAACCGAGATCAAAGACCGTGTACGAAAGATGCTTACCCTCGTCAAGATGGAGGATCAGGCTGCCAAGTATCCTTCCCAG…
24892	c_000000006329	4478	6983	r	Zinc carboxypeptidase	PF00246	ATGAAAACTCTGGGAACCATTTTATTCTTTCTTTTCTCTCTCTCCGTACTTTTTTCCTCGTCTCCAGAACTTATGGTGGTCAGGTTGGAGAATCCGCATAGTTCCGAAATTGATCGGTTCATCAAACAGGCTGGTTGGGATGTGGCAGGTTTCAGAGCTGGTAAATATCTGGATCTCGTTTTGAGCCAGGAACAATTTGAAATGCTCAGCCTGGAGTATCCCTCCTTATATGTCACCCAGACGGAAAATGAGCTTCGGAGCAATATTCTGCCAGGCAAAGACTTGGCCGGGTATCGAAGCTATCAACAAATGCTGGCTGAATTACAGCAGCTTCAGGATCTATATCCAACCTTGATGGAACTTCACCAGATAGGCACGGGCTGGGGTGCGATTTACGCC…
24893	c_000000006329	7388	9197	r	Porphyromonas-type peptidyl-arginine deiminase	PF04371	ATGCTCAGTGCCAAGCACAGCTTTTATCTGCTAACAGTCCTGATACTGGTCATGATCCCGGGATTCTTGCCGGGACATGTCGATCTGCCTACGGACACCGTTTTTGCGCCCAGCCGTTTCACCGAGACTAATCCACCCCAAGGCCCGGTGCGGCCTGTGGCAGAATTTGAACCTGCCTCGCACGTGCTGATCAGATATCCCTTGGGATTCCCGGTCAGTCTGGTGGTGCAACTGGCCAGTCAGGACCAGGTGATCTGCCTGGTTTCCTCGCAGTCCCAACAGAATCAAGCTACTTCAACCTTTAACTCGGCAGGGGCAAACATGGCCAACATCAGCTTCATGATAGCAGCCACCGATTCTTACTGGACACGTGACTATGCCCCCTGGTTCATCTTTGAT…
24894	c_000000006329	9869	10220	f			ATGAGTACCAAACGACACATGATAGTTAAAGAGCTTGATCCTGAAAGTGTTACAGGATATTCTGAAAACGAGAAGAAGCATTATGTGAGTTTGGGTTATAGGCCATATCTGTTGGAAGATGGAACGATCAAATGGTTGACCGCGGCTCAGAGAGCCTACAGGGAAATGCGCTACGCTCCCCGCAGGTCACTTAAAAGATTATTTAACAAGAATACTCGACCTAAAAACGTCAGGTATAAGAAAAGACGTGGAAGGAGCGTGAAAAACTTCTTTCGGGAACACTGGCTCTTTTTGCTTTTACTGGTAAGTACAGCGTTAGTTATATTACTAATCTTTAAGTTTTGGATCTAA
24895	c_000000006329	10262	10691	f	Survival protein SurE	PF01975	ATGACGACGGCATTCACGCCCCCCGGGATTCGCACCCTGGCGGAACATTTGAGCAAGGCTGGCCACAAGATAGTGATTGTGGCGCCGGATCGCGAGCGCAGCGCCGCTTCGCACTCGATCACATTGCGCAGAGACCTGCGCGTGACCAAGCTGAACGAGCGGGAATACAGCGTGGACGGAACCCCTGTGGACTGCTCGGTTATAGCTCTGCAAAAGGTCATCAGCGAACCAGTTGATCTTGTCATTTCGGGCATCAATGCTGGCCAGAACATGGGGGAGGACGTCCTCTATTCCGGAACTGTGGGAGCCGCTGTGGAGGCTTGCTTTCTGGGATTCAAGGCAATAGCTGTCTCGATAACATCTTACAAAGAACAGGTCTTCGAAACCGCTGCTGCCTGG…
26060	c_000000006613	596	1970	r	Thymidylate synthase complementing protein	PF02511	GTGGACAGCTCCCTGCTGAGCAGCCTGGACAACCCCGCCGCAACCCCCGAAACCATCTCCGCCGCCTACGCCCGCGTCAGCCGCAGCCCCAAAACTGTGACTGAACTGCGTTCCGACGCCCTGCGGGAGATCAACAAGGCACGGCGCTCCAACCAAAACATCATCTTTGAGATGGGGCACGCCTCGATCGCCGAGCACGCGGTCTTCAATTTTGATATTATCGGCATTTCCCGCCTGCTGGCGGAAACCGTTGAATCCATCCGGCTGGCTTCCTTCACCGAAAAATCACAGCGCTATGTGACCTTCACCCAAGCCTGGGTGTTACCCGCAGAACTGGACTCGCGGCCCGAACTGCGCGACCGCTATGAGGCTTTGATGGATGCCCTCTTTACGGAATAC…
26061	c_000000006613	2008	2782	r	DeoC/LacD family aldolase	PF01791	ATGAACAAGATCGAAACCATTGCCAGAAAACTGTTTGGAGACAACCCGCCCTGCCGTTGCGGAGGCGGACATCAGATCTGCCTCGGCTGCGCCGTTTGCCGCGCCGGTATGCCGGATATGATCTTCGATCCCGCCCAGGGAGTCGCCTCCATCATCGACGCCACGCTGCTCAAAGCCGACGCCACACAGGAAGAGGTGAACGCCCTTTGCGACCTCGCCAACGATTACAAATGCGCCTCCGTCTGCGTCAACTCCCACTTTTCCCACCCCTTGCAGTTGCGCCTTTCATCCTCTGTCAAATCATGCACGGTCATCAATTTCCCCCTCGGCGCGGGCTACATATATGCCGTGGTGGCGGAAGCCATGGCGGTGATCAACACCGGCATCGAAGAACTGGAT…
26062	c_000000006613	2791	3238	r			GTGCCCGGCATCCACAAGCTGACCGGGTCCGGCGTCAAAGTCAAACTGGCGGTGTCGCTCAACGCCGCTTCCGACGATATCCGTGGCTCCCTGATGCCGGTCAATCACAGGTTTCCCCTGGATATCCTCAAAAAGTCTTTGCTCAACTATCAGAGGCGCAGCCCCTTCCGCATCACCCTGGAATACATCCTGATCCCGGAGGTGAACATGAGCGGCCAGGACCTGAAGCATCTGCGCAAATTCTGCTCAGACCTCTCCTGCAAAATCAACTTCATCCCCTACAACCCCGTTCCGGCCCTCTCCTACCGCAGCCCCACCGAGGCTGAAATAGACGCCTTTCTCAAAGCCGCCCGGGAAATCCCCCAAGCCATCACCCTGCGGCGCAGCAAGGGCTCCGAC…
26063	c_000000006613	3216	3813	r			ATGCTAAACAGCATCTACGGCATCTACCCGCCGGATCTTTTACTTTTTTGGGAAAAGACTTCCCCGCCTACCGGGCAAACAGTTGCTGGACTGGCTGTATCGCAGTTCGTCTTCGAGCCGGAGCGGATGACCAATCTGCCCGCCGGGTTTCGCGAACACCTGAGCCGCAGCTTCGATTTCAGCGTTCCCGCCATAGATCAGGAACTGCTGTCCTCCGATGGCAGCAGAAAGTTTCGTCTGGTGCTGGCCGACGGCGTCCGCGTCGAAATGGTCTTGATGCCCGAAGCCAAAAAAACTGACCCTCTGCGTCTCTTCCCAGGTGGGCTGTGCCCGAACCTCGCCTTTTGCGCCACCGGAAGAATGGGCCTCAGCCGCAATCTGCAGACGCATGAGATCGTG…
26064	c_000000006613	3806	4643	r	PSP1 C-terminal conserved region	PF04468	ATGCAAGAATATATAGAAGTGGAATTTCGCTCCGGGCGTCTGGGTTACTACCAAAACACCCAGAATCTGCCCCTCAGGCCGGAAGAACTGATCATTGTGGAAGTGGAGCGGGGCGAAGATATCGCCCAAATCGTCCACCTGAGCATCAGCGAAAAAGAGCTTGATGCTCAACAGACTGGAAAAGGATACGGCATCCGCCGCATCGCTACCCAGGAAGATATCGACAAGATGCGCAACCTGCCCTCGGAGGAGGAGAAAGCAGCCGCTATCTTTGTGGATATCCTGCAGCGCTACCCCTTTGCCATGAAACTGATTGAAACTATTTACCAGTTCGATGGCAACAAGCTCACTTTTTTCTTCACCGCCGACGGACGCATCGACTTTCGCGTCTTTGTGCGC…
26065	c_000000006613	4661	4946	r			ATGTTTCTGGGAACCATGGTGGGAGACCACACAAAGCTTGGCATCAACTGCAGCATCAATACCGGATCTGTGATTGGAGTGGGCTGCAACCTCTGGGATTCCGACCTGATCTCGGATTTTATCTCCGATTTTTCCTGGGGGCCTGCCCGGGAGCTCACATCCTATCGTTTTGATGCCTTCTGCCAGGTCGCGGCCACCGTAAAAAGCAGGCGCGGTCTGTCCTTCACGGAGGCTGAAGAGGAGCTTTACTCCCGGATACATGCCGCGCGGCTCGCCCAGATCTAA
26066	c_000000006613	5400	5628	f			ATGATTGAAATCGAAGGCCAACAGCCGCGCGTTGTCCTGGATCAGATCGCTAAGGTTGCGATAGAGGCAGGATTCCAGGGCTATGATCTTGTATCCGGCCTGCGCAAAGTAATCCGCGGCAAGGGTAAATTCCGGGGCGGGCAGGCCCCTGAAGGCCACCGGCGCGCTGCCAGAAACAAGGCATTCTCCGCTTTTGAGGCTTTGGACGGCTTCGATGTTTTCGGGTAA
26067	c_000000006613	5871	5952	r			TTGGTCTTCACCATGGTGCTGGGGCAATTTAACCTCTTCGTATGGCATGGCAAAAAGCCCTATAAAAGGAGCAAGGCATGA
26163	c_000000006639	2	587	f	tRNA synthetases class II (D, K and N)	PF00152	GACGAGTTCCACTATCGCGGGCACACGGTCAACCTCGCCCAGCCATTTTTGCGGGCTCCCATGATCCAACTGGTGAAAGAGCATGTCGGCATCGATCTGTCCGATATGAATTTGGAACGGGCGCTGGCTTTCTGCAAGGAACGCCGGCTGGAGGTTCCCGCGGGTGCCGGAGTGGGCAGACTGATCGCGCTGCTCTTTGAGCACTATGTGGAGGAAAAACTTGTCCAGCCCACCTTTGTGACGGATTTTCCCAAGGAGATCTCGCCCCTCGCCAAAGCCAAACCCGGCAACCCGGATCTGGCGGAAAGGTTTGAACTATTCATCGCCGGACATGAGTTTGCCAATGCCTTCAGCGAGTTGAACGATCCACTGGATCAGCGGGAACGCCTGGAAGCCCAG…
26164	c_000000006639	1094	2792	r	Na+/Pi-cotransporter	PF02690	ATGACTTGGCTGGACATCGTCAACTTGTTTGGTGGATTGGCTCTCTTCCTGTTTGGCATGAACATGATGAGTGACAATCTCCAGGCTGTTGCGGGAAACGAGATGCGGCGCATCTTGAAAAAGATCACCAATACTCCGTTCAAGGGAGTTTTGGTGGGCATTGGCATTACCGGCATCATCCAAAGCAGTTCTGCCACCAGCGTTATGTTGATTGGCCTGGTAAATGCTGGGATCATGACCCTTCAGCAGGCTGTGGGAGTGATTATGGGCGCCAATATCGGCACCACCGTCACAGCGCAGTTGATCGCTTTCAATATTGGGGATGTCGCTTTTGCCTTTGTGGTCATTGGAGTTATTGGCATTTTTCTGAAACGCAGCCGCACCATGGAACACTGGAGC…
26165	c_000000006639	2918	3584	r	Phosphotransferase enzyme family	PF01636	TTGAACAAAACCGGATTGAAAGCTTCAAAGTGGAATAAGAACTCCAATAGATTTGAAGAGAAATCGCGCCTGATTATCCGCGACGGTCAGGTTTACAAATACTTCTCCGATCCCGGGGCTTTCCATCGCGAGATGGCGGCTTATAGCCTCGCTTTACCTCAAACTCCCAGATTGATAAGGTGGAACGAGCCAGACCTTATTGTGCTGGAACAAGTTCAGGGCACGCCCTATCTCGACCTCCCGCTGGATACCCGGATTTGCGTCCTGCTGGCGGACACCATCAGCGCTTTCCATCTGGCAACCTTGCAAGAAGGCCGCTGCATCTGTCATTGGGACAATCAACCACGCAACATCCTGGTCAAAGATGCCACCTGCTGGCTTTTAGACTTTTCAGATTCG…
26166	c_000000006639	3546	4374	r	SMP-30/Gluconolaconase/LRE-like region	PF08450	TTGAACAAACTCAGCAAAAACAGAATCATAATCATTTTGGCGGCGCTGGTATTGATTCTGCTGGCAATCTTGATCCTGGGCAGGATCTTGGGCCCCGCGAAATTGAATAAACCGGAAAGCATAGCTTTTGACAGCGTCAATGGCACTTTGTTGATTTCCAATGTCGGAAATGGCAAGATATTGAGCATGGACGACAAGGGTCGTTTTGAAACTCTTTATTGGCAAGGGAATCAAAATCCCCGCGGGATGAAGGTGCTTGCCCCTTTTCTTTATGTGGCGGACAGGACTCAATTGCATGTGATCGACCTGCAGGAGAAAAAGATAAGCCAAAGCATCCCGGTGGAGGGAGCCAAGATGCTGAACGACGTGGAAAGCGACCGCTACGGCAAGCTCTATGTC…
26167	c_000000006639	4389	4800	r	DALR domain	PF09190	GTGGAAAACAGCATCGTTGAGGATAACAGCCTGTCTCAGGCGGAACAAGACTTCATCGCCGCCATGGATGACGACATCAATTCCGCCAAAGCCATCGCCGTGTTGTTCGACCTTAACCGGCAGATCAGGAATGAGCAGTTGCCGCGGACTCAGCGCGAGCAAGCCGCCCTGATGCTGGTCAAGTTAGGTCGGGTGCTGGGATTTTTCCAAAATCTGGAAAGCATTTTGCAAGATTCCGTCCCCGACCTGTCCAAACAACTAATGGAACTCATCCTGGCTTACCGCGCGCAAGCCAGGGCTAAAAAAGACTGGGCTGTTTCGGACAGGATCAGAGATGACCTCGCGGCCCTGGGAATCGAGATCAAAGACACCCCCGAAGGCTGCACCTGGAGCATCAAA…
26168	c_000000006639	4864	5431	r	tRNA synthetases class I (C) catalytic domain	PF01406	ATGCCGGAGATCATCGAGCTGATAAACGCCCTGGTGGAAAAAGGCAACGCCTATGAAGTGAACGGCGACGTCTATTTCGACACAGCCTCTCTGCCTGAATACGGCAGCCTTTCAGGCAAAAAAACCGAAGACCAGATGCCAGGCGCCCGGGTCGAAGAAAACCTGCAAAAACGCAATCCTGCAGACTTTACCCTTTGGAAACGAAGCAAACCCGGGGAACCTTTCTGGCAAAGCCCCTGGGGCGAGGGGCGTCCAGGCTGGCACACGGAATGTGTGGTTATGAGCCGCAAATATCTGGGCGAAACTTTCGACATCCACGGCGGCGGGATCGACCTGATCTTTCCCCACCATGAGAATGAGCTTGCCCAAGCCCTCGCCCTCACCGGCAAACCTCTGGCA…
26169	c_000000006639	5375	5780	r	tRNA synthetases class I (C) catalytic domain	PF01406	ATGCAACTATACAATCAAAGCAAACGGAAAAAAGAGGAATTCATTCCCATCACGCCGGGACAGGTAAAGATCTATGCCTGCGGGCCCACTGTCTATAACTATTTTCACATCGGAAACGCCCGCGCCTTCATCTTTTTCGACGTCCTGAGACGCTATTTCGAGTATCGCGGCTATGATGTCACCTACGTACAGAACATCACCGATATCGATGACAAGATCATAGCCCAGGCAATCGAAGAACAGACCAGCTTTGAAGATATCGCCAGCAAGTATATCCAGGCCTTTCTGGATGACTCGCAAGCCTTGGGGAATAAAGCCTCCAACCCACCAACCCAAGGCCACGGAGGTGATGCCGGAGATCATCGAGCTGATAAACGCCCTGGTGGAAAAAGGCAACGC…
26170	c_000000006639	5787	6603	r	FlgD Ig-like domain	PF13860	TTCAAGGGAGAGGTCTCTGTTCAATCCGGTGATTACAGCGCCTCTTTCATTGTTCCCGATGATGTGCGCACAGGTGACACAGGTCTGATTGTCTCATATCTTTGGGATGAAGACGCCAAACAGGACTACGTTAACTACAAATACCCCACCATGCTCAGCTCTCAGGCTGTGATAGCGGAAAATACAGACGTCCCCAAAATAGAAATCTTTCTGGGCAGCATGGACTTCAGGCCAGGTGATACTGTGACCCCCAACACCACCCTCATTGCCAGAATCTCAGATGAAAACGGCATCAACATCACAGGCAGCCCGGGGCACAATATGTTAATGATCCTGGACGGTTCACTGCAAGCGGTTCCCGTAACCTCATACTTCAATTATGAGCCGGATTCGCACACT…
26680	c_000000006776	204	528	r			ATGAGCTTGCCAAAAGCGGTTACATCCCTTCCTTCTGCACCAGTTGCTACCGCGCCGGAAGAACTGGCGAACACTTCATGGAATTCGCCGTTCCCGGCTTTGTCAAACGCTTTTGCACCCCCCAATGCCTTGCTCACCTTTGCGGAGTATCTCTACGACTTCTCCTCGCCCAGAACCCTTGCAGTGGGCATGGAATTGATCGAAAGCGAAACAGCCCGCATAGAGGACGATAACATGCGCCAATCCGTGCGGGATAAAACTGGCCAGCATGAAAGCTGGGCAAAGGGATTTGTATTACTGATCAAAGAAAAAACCAATATGTAA
26681	c_000000006776	531	1638	r	Biotin and Thiamin Synthesis associated domain	PF06968	ATGAAAATCAGCACAGAAGGCCTCAAATCCTTTATTCCCACAAACACGATCAACGAACTTATCGAGTCCCAGGCTCACGCTCCGGAATCCCGCGTAAGGGACATCATCGCCAAATCACTGGACAAACAGCGCCTCGAGCCTGACGAAACAGCCGCCTTGCTCAGCGTGAGCGATCCGGAGCTCAAACAGCTTATCCTGCAAGGAGCGCACGAGCTCAAGGAACGTATCTACGGCAACAGGATCGTCCTCTTTGCCCCTCTCTATGTGGGCAACGAGTGCGTGAACGACTGCGTCTATTGTGGTTTCCGCATCTCCAACAAGGAGTGCGTGCGTTCCACCCTCAGCCACGAGCAACTGATCGAGGAAACCAAGTCCCTGGTGGAAACGGGGCACAAACGC…
26682	c_000000006776	1655	1904	r			ATGGAAAAGAAACGCCATGTGGTAAGCATAGTGATCGACAATATCGAAATGGCACACGATCCGGTTAACTCTATCTTGCACCAAAACGCACAACACATATTGCTCAGGGTCGGATATCCGATGCGGGATCGCAACGTATCGGTTATCTTTCTGATCCTGGAAATGGATTTGGACGAATTGGGCGCGTTTTCCGGAAAGCTGGGCCAGCTGCCCGCGGTAAAAGTTAAAACCATCACTTTAAAAATCTGA
26683	c_000000006776	2152	3115	f	Peptidase_C39 like family	PF13529	ATGAAAAAATTAGTAACCACATATATATTATTGATTATCCTGTATGGATTATCCGCCACGGCTGGATTCACTTGGTACTCTCAGAGTGACAGCCGTTGGGAAAGTAAGCGATTGGGCAATTCCCGCAGTTCGATCGGCAAAAGTGGGTGCGTGCTATCCTGCCTCTCGATGCTGCTCAGCGCGGAGGCTTCCAATCCCAGAGTCACGCCAGATAATCTCAATGAATGGCTGAGGCAAAACGACGGCTATGTTGGAAACCTGATGCGCTGGCAGGTGGCTGCAGAGATCGATGGCAGCGGATTGGGACTGGAATTGCAGAGCCAGACCAGCAAAAACAACGATTGGAATTATCTGAGCGGAGAGCTGGACAAGGGAAACAAGGTGATTGTGAAGGTCAAA…
26684	c_000000006776	3352	3703	f	Glycogen debranching enzyme N terminal	PF12439	GTGAACAATTATTTTATGGAAACCCACCATCATGAGTGGATTTTGACCAACAGACTTGGTTCCTATGCCTTAGGCACGGGTAACCTGATCAACCAACGCAAATACCATGGACTGCTGATCGCCAGCAACGAGCAGTTTCAGCGCTACCATCTGGTGGCGGGAATCGAAGAAAAGGTGGAATGGCGTGGTCAGACTATCCATCTGGACAGCAACAACTACAGCAACTGCATTTATCCGGAGGGGTTCCTCTATCTGGTCAAGTCATGGTTGAGGCCCCATCCCGCCTTTTTATACTCCGCGATACCTCATCAAAAACGACATCCTGATCCGCAAGGACATACTGATGGATGA
26685	c_000000006776	3608	4058	r			GTGTTCGCCCACCTTGAGGGTAAAGTTCAGTTCAAAGAGGCTGATTTGATCGCCGATTCCAGGGTATCCGTTCATAACTTCCCAGGGGAAGAAAACATTGTAGTACACAAAGCGGTTGTGAGTGATCTCGCCTTTGGCCAGATGCCCGTACACGCCGATGTGATTGTCTTGCCGCAAAGCGCCGAAACTGCTGCCCTGATCAGTGTTTTCCACTGCGGTCGGGATATCAAGATGATCCATGGAGCCAGGGTGGTTCAACTCGTGGTGCATCACCATCGTGAACTTGGGATGCAGGCAAAAATGCAAGGGATGATGGCCCAGATTGGTGTATTTCACCAACACCGTGTTACTGCGTTCATCCATCAGTATGTCCTTGCGGATCAGGATGTCGTTTTTGAT…
26686	c_000000006776	4332	5385	f	Amylo-alpha-1,6-glucosidase	PF06202	ATGCTCGTGCTCAACGCTTTGCTGCACGACGAGGGAAACCTGAAACTGGTGGAAGCCATACTGCGCAAATACAGCCTTCAACTCAACAATGGCTTGATCCCCAATATGCAGCGGGAATCGGGAAGGGAAGCCAATTATGACACTGTGGACGCAACTCTCTGGTATGTGATCCTGCTATGGAAACTTGGCAAACGAAAAGCCAAAGCCGCATATTGGAAAGAGGTTATCCTCCTCTGCGAAGATGTGCTGAAAAACGTGCTGACTAACCAGCACTGGCCTTACTTTGTGCGCGAGGACGGCTTGATCGAGTTGAAGGAAGAGTTTGCCCACGCCACCTGGATGGATGTGCGCATCGACGGCAAGGCAGTCACTCCTCGCAACGGCGCTCCGGTGGAGATC…
26687	c_000000006776	5388	5802	f	Starch synthase catalytic domain	PF08323	ATGAAGATATTGATGTTCACCTGGGAATTTCCGCCCCTGATCTCCGGGGGCCTTGGCATGGCCTGTTACGGCATGGTAAAAGCCCTGCTGGCTCTGGGTATCAAGATAGACCTTGTCCTGCCCACCAAGGAAGCCGTCTATTTTCCGCTCAGGCAGGAAAGCGATGTGGACACCCTGCCGGCTGTATTCATGGACGCGTCCATGCACAGGAAATACCTCAACATAAGCTTCAGTTCCCTGCAAGAACGTTTGGAATACATAGGAATCAGCGGAAGGCCGGAATCCTACATCCAACTGGATGAGATTCGGGATTATCTGAAAGAAGTCAAGAAGGAGACCTGGCAATCAGTCACCACCGTCAAAGAAGAGCAGGAGCTGTTTGCCGATATGACCGCGCAC…
26688	c_000000006776	5913	6741	f	Glycosyl transferases group 1	PF00534	ATGCTTGCAAAGAAAATATCCGGCCGGCCTCTGGTGGTACACATCCATGCCACGGAGTTTGACCGGGCGGGAGGACCAGGCGACGAACGGGTACACAAGATAGAACACAGCGGCATGATGTATGCCGACAAGGTGATTGCCGTATCCAAATACACCGCGCAGATGATCATGTCCCGCTATCGGATCGATACTGCCAAAATCAAGATCGTGCACAACGCCTTCACCCTCTCTGAGGATATTGTGCTTACCAAGAAGAGGATATTTAAGGGGCCAACGGTGCTTTTCCTGGGCAGGCTCACTCTGCAAAAGGGGCCGGACTATTATCTGGAGGTCGCCGAGAAAGTGATCCAGGCACACCCGGAAGCCCGCTTTATCATGGCTGGCACGGGAGATATGTCC…
26689	c_000000006776	6810	7872	f	Glycosyl hydrolase family 57	PF03065	TTGGATATCGGCAAAAAAGCCAACCTCTTCGATGACGCTCTCAACGGCCAGGTGATGCGCAAAGTGGCCCAGAAATGCTATCTGCCCACGAACAACCTGCTCTTGTCCCTCATCAGGAAGCACGCGGGGAGGTTCAAGATAGCTTATTCCATCACCGGAACCGCGATCGAGCAATTCAAGCTCTTCAGCCCTGAAACGCTCGATTCCTTCAAGGCTTTGGCCGACACCGGCTGCGTGGAGTTCCTGGGCGAAACCTACTACCACTCACTGTCTTTCCTGTATGACACGAACGAGTTTCTGGACCAGGTGGCCATGCACCGGGAACTGATGAAAAACGAGTTTGGCTACTTCACAGAAACCTTCCGCAACACAGAGTTGATTTATCAGGACAAGCTGTCG…
27013	c_000000006870	187	1648	r			ATGGATGGGAACCACTACCAGTTCAACTTCTGGTATGTGGACGACGTTTACCTGGCTGTTCCCTATAATCTGGATGCCAAGGCTGTATCCATCGATATGTATCAGGTGGTCGAGCCGCTTGCCTTCACCCCCATGGCCACAGTGGGCAACAACGGAACCCAGACCATTTCCTTCAACGTGACCATAACCATCGGTGGCACCACCCTGCCTGCCCAGAGTGTAACCGCTCTGGCGCCGGGGGCTACCCAGCAGCTCAGCTTCGGCAGCTTCACGCCAGTGGCAAACACCTTCTACGATGTGACTGTCACCACCAACCTGGCAGGCGATGAAAACCCCGCAAACGATACCATAACCGGCCAGTTCGTCTGTATTGAACTGAACAAGACCGCCTATGGGGAC…
27014	c_000000006870	1760	3230	r			ATGGTGCCTGCGGGTGCTTCCGCGGAAAAGGAATTTGCTGTCACCAATACCGGTTCCGGCACCCTGACTGTTTCCAGCATTACCCAAACCGGGACCAATCCCCCCTTCTCAATAGTTCCGACCTCAGCCCTGCCCTGGTCGCTGACCAACGCGGATCCCGCCAAAACCTTCAAGGTTGTGTTCTCGCCTCAGACCGCTGGAGGACCCTTCAGCACGGATGTGACAATCACCTACAACGACGGGACACAGGCCACCTATACGATCAGCTTCACCGGTTCCGCCTACGCGCCTGCCACACTGCCCCTCACCGAGGGTTGGGAAAACGGACAGGGCACCTGGATCTTTGTGAACGGGACCCAGACCAACGCCTGGTACATCGGCGCCGGCGATGCCACTTAC…
27015	c_000000006870	3259	4006	r			GTGGTGGGTGACAACACCTATACCTTCACGGGATTGTCCGAGGTCACTGCCTATGAATTCAAAATCTGGCCTTACTCCAACGATGGAACCGACATCGACTTCAAGGTTGACGCTCCCATCCCTACGGTGAGTGCCACTACACTGGATCCCACCATTTCCGCGCCCTGGCTGGAAGACTTCGGCAGCACCGGCGCCACCTTCCCGCCCGCGAATTGGACTCGCGGAACCGGACTGCTGGCGGATCCAACCGATATAATAACCGGTGATTACTGGGTTCAGGACAACTGGCTGAATGACACTACGGTGAGTCCAGTTAACTGGTCTGCCCGGATGAACGTTTACGGTACCAACAGGGGAGGATGGCTGATCACTCCTCCCATCCAGATGCCGGGAACCGGT…
27254	c_000000006937	42	585	r			ATGCAAGCAAGATTTTTAAAAGATTTCGCAATAGCATTGATCGTGATCCTGCTGCTTGCCTATGCAATCCGCTTGTACGCGTTGAACCTGCAGCAGGCTGGGATCCCGGATGAATCCAAATATACCCAGAAATCGGTGTCCGACACCCTGCTCAACAAGATCAAAACCATCGAGTCCTCCATCCAGGACCGCAAGTTCTTCCAGTTCACAACCACACGTGATCCCCTGCGGCAAGGCAATGTGATCAAAGATAAGTTCGACATGGAAAAAGAATTCATGCAGATGGTCTTCAACACCTTCCGTCCCACCGGTACCTATCTCGACAAGGAGACCGGCAAACGCATGGTCAACATTGAGTTTATGGGCAAGATCTATACCGCGGGGGTCGGCGACGTGGTC…
27255	c_000000006937	586	1135	r	Pilus assembly protein, PilO	PF04350	ATGCGTGAGAAGTACATTGTCTTCATTCTGGGCATGGTCTTACTTACCATAGCCTTCTTCATGCTGGCTTCCAGCGTGATCGACGGTAACGAAAGCAAAATAAACCAACTCGATAAAAAGATCAAAACCGCTCAGGAAAAGCTGAACAGCGCCAGAATCATGGATGAACAGCTCAGCCAGTTTTCCCTGATCATAGATAACAGCCTGTCCCGCGAGAAATCTTTCTCTTTCGACGAGATTAATGAGTTCAAGAAAAAGATCGGCGATATGGCGAACAACAACCGGATCACCATCAATAAGCTCTCCGATGCCAACAAATTTGCCATTCCCGGACTGATTGAAACCACTTACAATATGGAGTTGGAGGGCACCTACGTGCAGATGGGTCAGTTTATTGCT…
27256	c_000000006937	1134	1734	r			ATGACAAACGTGTTTTACTTCAAAATCAACCTGAACAAATTCGGCGAAATGAAGCTTCAGGCGGAGCGGGAAAACAAAACTTTCCGCAATGCCGTGATCGCCTACTTGGTTGGTACACTGATCATGTTTGGCGGTTTGTTCTATCTGAATGGTATCCTCAAGAAAAAAGTCGAAAACCGCCGCAAGTTCCTTACGACCACTGAAGCGCAGCTCAAGCAATTTCAAGCCAGTGAAGAGTACCTCTCTATGGTCGATGTGGACCGCCTGGCCCAGACTTTCAACAACCGGATATTCTGGGCAAAGAAGCTGGTGGCTCTAAGCGATGAGATCACCCATTCGCTAGCGGTGCGTAAATTTACATATAGCAATGGAGTGCTCACTCTTAACGGTATCACTCCG…
27257	c_000000006937	1743	1863	r			GTGAGCATTCCCACCGATGTATTTATGCCCTTTATCAATGTGGAAATGCCGGAAAAATTCATGGACAAAAAAGATCCCCAGCTGGCATTGGCTATCGGCCTGGCCATGCGAACGGAATAG
27258	c_000000006937	1859	2111	r	Type IV pilus assembly protein PilM;	PF11104	ATGGAATTCGAAGAAGCGGATGAATACAAGCTGAAATGGGGTTTGCTGGACGATCCCAGCATCAGCGAAAGCAAGACGATCAGCATGTTGGATATCTCGGAAAAATCCACCGAAGACGCCATTGTGGAAGAAATCCGCCGTTCTCTGCGGTTTTATGTGAAAGAAGCTGGCACCAGCGACATCCGCAAACTCTATATGATGGGCGGCACCGCCAAGCTGAAAGGTTTGCAGGAGTATATCCAGGAAAAGTGA
27259	c_000000006937	2088	2514	r	Type IV pilus assembly protein PilM;	PF11104	TTGCCTGATGATGAACTTGAGTCCGCGCTCTTCTTTGAAGCCAAAAAACACATCCCCATCAGCGGTACAGACATGATCCTGGATTATCAGGTGCTGAGCGTGGAAGAGAAGACCAACAACATGAACATCCTGTTGGCGGCAACTTCAAAAGAGTTACTGAACGAGCACACCAGCACCCTGGTGAGCGCCGGTCTTACCCCCAACATCGTGGATATCGATTCCTTGGCAGTGGCCAATAGTTTTGCCCTGAACGCTTTTGTGGAAGAAGGCGTGTATGTGTTACTCAACCTGGGCGCGCACCGGACCAATATGGTCATCTGGGGGCCTGAAGCAAGGTTCTTTGCCCGCGACATCCCCTATGGCGGCTATCATTTCACCCGCGACATCATGCGCAAAACG…
27260	c_000000006937	2506	2752	r			GTGAAAGTGGTGCATCTGAAGAGACTGCACGAAGGATTCAAGCTGTTGAACTATGAGATTCGTCCCACAGTTCCGCAAGGCGTTGAGTATATTCCCAGTGACCTTAGGCCGGATCGCTATGCGCCCGTTTTGGTGGAGATCTTCAAGACCCTGCGCATCAACCCCAAAAAAGTGCAGCATCTGGTAACTTCCGTTGGTGGGGACAATACCAGCATCAAGCAGATCAAGACGATCTTTTTTGCCTGA
27261	c_000000006937	2850	3156	r			GTGCACCGCAGCTACAATGACACCGAGTATCCAAGCCACGGCGTCTGGGATCAGCCGATCGACTTTTGCGGCGGCTCCAGTGCTCCCTATGATGTTGAACAAATTGATCCGGTGCTGGGTTTCCAATTGATCACGCGGCACTTTGATGGCGCCAATGGCACAGGAACCGGTTATAAGAAGAATTACCACTACGACGATAGATTTTATCATACCTCCCCGATAGATTTCCCGGAAGTCAGCCGTTACAACGAAACTCCATATACGGCATTGCACTGGGTGATCAAACGTCCACCGGAGAATCTGTAA
27262	c_000000006937	3345	4710	r			ATGCTGAAGATGTTTAAAAACCCCAATGGAAACATTGCGTTAGCGATGCTGTTGGTGGTATTCGGCGCAATGTCCGGTTTTACACTCAGTAGCCTGGCGATGCGTGACGCGGTCGCTTTCCAGTATGATTTTGAATCTGTGCAAAGCATGATCCTGTTGCGCAGTGAATCTTTTCGCGGCCAGAGAATCGCGCAGAGACTGGGGAATATAATGGTTCCCGTGCGCACCTCTGTGCGCTATGTGCCGGTGACAAACTCAGCCTTAAAAAAGACCTTTGTGATCCAGTCCCAGCTAAGCCGCGGAGGTTTGGTCGCGGTTGACAGTGATGTGGTGATGGGAGACCAGAAACAGATTACCCAGATCCGCTCGCTGGTTAAATCCAAGACAGGAACGGGCCCT…
27263	c_000000006937	4741	5350	r	Prokaryotic N-terminal methylation motif	PF07963	ATGACGAAAAGAGTTAAACCGATCCCCGGTTTCAGACACCCGGAAAGGGGAATGACACTTGTGGAGGTGATCGTGGTTATGATTATCTCCACCTTGCTGATAATGATTTCCGCCTTGGGGATCGGGCTGTTCTTGCGTAAATACAAAGAACTGAACGCCTGGGCGGAATTGCAAAAAGAAGCTTGGGAATGCCTGAGTACGATCAAGAACGGAGTGCCGGTCGGAACTGGCCTCAATACCGAGTTTATTGGAGTAACCAACGCCCTGCAGCTCAGACTGATGAACACGGCCACCAATTCAGGAACCTACTTGAGGATCACCCCGCCTACTGACCGGGGCTTGGATACATCGGACTATGCTCTGTTCTATCTATACGATGGCGCGGTCCGCTGTTCTTAC…
27264	c_000000006937	5346	5820	r			TTGATGCCCGGTTTGGAGAGAAGCATGGACAACAAGGCAAACAGCGGGGCGTTCGAGCTCTTGCGCGCCCAGGGTGGCTTCACCTTGGTGGAAGCCCTGGTGCTCACTCTGGTGATCGTAGTCCTGGTGGTCAGCGTATATATCGGCGTTGTATTTGCCGAGAAGCAACTGCTGGTCAATTATCGTGACAGAGTGGCTACGCTGCTGGTGGCAGGCGAACTGGAGATGGAGTATTACCGCAGTTCGCGCAGGCGGCCGTTCGAGCTTCAACAAGCCAGGGAATATGTCCTGGATGACATCGGTAAATCCGAAACCCTGAAAGGGCGCATGACCATCGAACTGAAGTATGGGGAAGAAAGCTCCAATGAACAGGTGATCAAATATCAGATCCTGGAAGCG…
27265	c_000000006937	5816	6044	r			GTTCCCGCCCTGGAGATAATGGTGGCCAACGCCGCGGTGCGCAACCTGATCCGCGAGGAGAAAACATATCAGATACCCTCCATCATTCAGGCCAGCACCAAGGAAGGCATGCAGACCCGCGACCAGTCGCTGTATAACCTGGTGATGAACAATCTGGTGGAACGCACAATCGCCGAGGAATTTGCAGACAATCCAAAGCAATTTGCTTCCGGAGCCGGATTTTCTTGA
29269	c_000000007475	2	1730	r	Zinc carboxypeptidase	PF00246	ATGAAACGCATCTTCTTAATAACAATTTGCGCAATCCTGACTGTATCAGGATTCAGTTATCCAGTCATCATTCAAAGCTGGCGCCTGAATGAGGATGTCAAGGCTTTGAATATGGCAGGGATCAGCGTGGACTATGTGAATCGCCAAAGCGGCAACATCATTGCATACGTTAGAAATGATAGTGAATTCTCACAGATCCAGGCTTTGGGATTGGCACCGCAGAAACTGCCCGATACTGCCAGGGAGAACGCACAACGGCTTCATTCCTCCCCTAAAAACGGCTCTCCGAAGGACGAATATTTTTCGATCGATCAGTATAACCAGTTTATGGTTTCCACCGCCAATAGTTATCCCAATATCTGCCAGCTTGTTCAGGTAGGCAGTTCAACGCAGAACCGG…
29270	c_000000007475	1983	3492	f	Beta-propeller repeat	PF06739	ATGAGAAACTATACTTTATTATGGATTATCTGCGTCCTTTTAATGTCTGCATATCCCTTGGCAGGAGGATCATGGCAATGGGCGACCAGTTTTGGCGGTCAGGGTATGGAATCCGCCTGGGATATGGATGTACACACGAATTTTGGGGATATCTATGTAGGTGGAGATTTTACCGATTCATTAGTCGTAGCTGGATCTGTGTATCCAGCCTCAGGTGAGTCTGATTCCTACATCATCAAGTACAACAGCCTTGGCATGTTTCAGTGGATCTGGACTTGTGGATCTTCCGAGCAGGACGTGTGCCTTTCGATAGCAACTGATGCCGCCGGGAATTGCTGCTTTTCGGGATTCTATTCTGGGTCTATGACGATTGAAGGCAATCAATACCAGAGCAATGGA…
29271	c_000000007475	3532	4369	f			ATGCTCTCCAGGTGTTTATCTGATCAAAGCCGGACTCAAAAGTGCCAAGGTGATACTGCTGAACAAATGATTCCCCCTTTCTGGCGCCCTATCATTATCCTTGTTGTGGCGGTATTGGTTTTGTTTGTCTTGGCAAACTTAATCCCCGCCTCGGATAACGAGCTGTTCCCCATCAAAAAAATGAATTTACCCGGAAAGCTCGCTGAAGAAGCACCAAACTCTCAGAACCTACAACAAAAGCCCGTTGAAAACGTTCCACCGGTGGCCAACGAATTGACACCTATTTCTGGGTTTATTGACAAGTTGAGAGGATACTCCCAAAAACAGACTGGCAGTATCAGGATCGCTTACTTTGGAGACTCGATAATCGAGGGTGACCTGATCTCGGGTACGCTGCGC…
29272	c_000000007475	4365	5043	f	GDSL-like Lipase/Acylhydrolase family	PF13472	GTGAACGTTATCCGCGATGGAGGCCGTCCACAACGCTATCAGCTGAGACCTTCCACCGGCGTCAGTATCCTGGATTTGGGCAGCGGCTCTGAAATCAGCAAGATTCGTCTGGAATTCAATCCCCTTGATCCCATCCACCTTTATGGCGTCAGCTTTGATGACGCGACTGGCGCGTATGTTGACAATCTTGCGGTTCGGGGATATTCTGGCCTCTATTTCCAGAGAATATCCAAAGAGACATTGAAAGATTTCAACGCGGCCCTGGATTATGACCTGATTATCCTCCAATATGGCGAAAACGTATCAAGTCCCAATATTCGTGATTATAGCAATTACCGGCGAGGCATGATCAAAACCGTGCGCCACATCCAATCCGCACTTCCCGGAGTGCCCATCCTG…
29273	c_000000007475	5144	5648	f			GTGGAGGAGTTTCCCATCGAGGTGGACAAACTCGACGAATTCATCCAAAGCTACTACACCCTGCTCGACAGCGAAGAATACTTAAAAGGATTTAGCTTTATAAAAACAGACAGCAATACAATAAACAACTGGGAAAAACGCCTGTCCCGTTTCCTGCTGAAACTTATGGAACTGCGAAGCGGACTGCGGGATCAGGTAACGATCTATCAAATAGGTGATTCCCATATTAAATCAGGATTTTTGGCGACAACGGTGCGCTCTTCTCTCAAAGAATATTTTGAAGCGGGGGATTCTGGGCAACATGGCACCCTGAATTATCAATTCACAGGGGTCAACGGCGGATCGTTTCAAAACCTGCTTAAGAACACTTTGATCTTCAACCGCTGTAAAGAGCTCTCT…
29274	c_000000007475	5635	5746	f			ATGGATCATTTGAGCGTCATCCAGGATGAGGCGGTAATTCTGTTTACTCTCCCCCCGGACAGCAACAAAAGAGGCAAGCACAACGCCGATCTGGAAAAAGGTTGGATCTGA
29275	c_000000007475	5801	5957	f			ATGGGTGGCAAAAAGTCCATCTCCAAATGGAGATCGGAAGGATTGGCTTCCAAAGACATGATCCATTTCAGTCCCCAGGGTTACATGCTGCAAGGCAAGCTGCTTTATCAGGCGCTGATGCGCGCTTACACGAGCTACGCGGGAGCGGATGAATGA
29276	c_000000007475	6048	7152	f	MBOAT, membrane-bound O-acyltransferase family	PF03062	ATGCTGTTTTACCCCCTGGTCGTCTCCAGGATCAGGATTAGAACCTGGTACCTGCTGCTGTTTTCCCTCTATTTCTATTACAAGACCAGTGGTGAGTTTCTCCTGTTGCTGCTGCTTACCGCGGGCATCAACTTTGTTATCGGATCCTGGATTGCCAAAGCAAACAGCAAGGCCGCGAAAAAAAGACTGATCTGGCTAAGCATTGCCTGGAACCTTGGTTCGCTTGGGTGGTACAAATACACAAACTTCATTATTGACACCATAAACCAGATAACAGGTGGCTCGATTCCCGCCATGGATATTTTCCTGCCGGTTGGGATATCGTTCTTTACTTTCCAGACTATGAGTTACACCCTGGATATCTATTTTGGGAAGTTGGAACCCATCCGCAGTTTTGCC…
29277	c_000000007475	7177	7432	f			ATGATCTCGCTGATCTTCAACCAGTTCAACGCTGGGCGCTTTATTATCTGGGTTTCTCAATACAGGATTGTGGCTGCTCTGATAGCTTTGGGATACCTGCTCCATTGGCTGCCGAAGCAATGCAAAACATTATGTGAAAAAATACTGAGCAAGTCCCCCATACTTGTTCAATCCATTTTATTGGCGATCATCATCTGGATCTTGTTCCAATTCAAGTCCTCTGAGGTTCAGCCTTTTATCTATTTCCAGTTTTAA
29336	c_000000007493	2	680	r	Carboxypeptidase regulatory-like domain	PF13620	ATGATCTACAACTCCGGTGAATGGGCAACTCTGACCGACCTGGCTCCGAGCCTCAACTACAACTGGAACATCCGCGGCTACGTGGGATATTCAGCTCCCAACGATGTGTGCGCGATCGATCCCAGCATCCTCAAACACATCCCGTCCGACAACATCAAAGCCAGCAAAGACATCAGTGCCTGCAAAGACAACGACCGTGTCCTCGTCGGCTACAGAGTCTGGCGCTTGCTGCAAGGCCAGGAAAACAACGATTCAGCCTGGACTCAGCTCACCACCGGACCCATCACCGCGACTGCCTGGCCGGACAACGGATGGGGCGGCGTGCCTGACGGCTGGTACAAATGGGCTGTGAAAGCCATCTACACCGGCGAAGCGCAATCCCTGCCAGCCTTCTCCAAT…
29337	c_000000007493	676	2788	r	Carboxypeptidase regulatory-like domain	PF13620	TACAACGTCGTTACCCACAACGTAACCATCATCGAAGATGAAACCGTCACCCAGGACTTCGTGCTCACCCAACTGCCTCAGGTCACCGTGACCGGCCGCATCGTGGGCAGCGACCAACCCACAGTCGGACTGGCTGACGCTACCATAACCCTCACCGGTTACGAGCCTTACCAGGCCACAACCAACGCCAGCGGCCAATTCACCATCACTGGCGTCTATGCCAGCCAAACTTACGAATACACCGCTCAAGCCATCGGTTACCAAGCTGCCATCGGCCAAGCCGTGGTTGGCACCACCGACCTGAACATGGGCGACATCACCGTGAACGAACTGGCCTTCCCTCCCTGCCAAGTGGTTGCCACAGAAGCAGCGGACTATTCGCACGTAACCGTCACCTGG…
29407	c_000000007515	1	790	f			GCAACCCTGGCAGTCAACGCCGAAGACACGGACAGCTTCAACATTGCCAACCTCGGCAGCCAGAACCTCAACTTTACCCTCGTTGAAGACCCCGCAGTAGCCTGGTTCAGCGCCAATCCCACATCCGGCACTGTCGCCGGAAATGGCAGCCAGATTGTCACCGGTTCATTCACCGCGGCTGGCCTCGCCCCGGGCACCTACACCGCCAACCTGTTGGTCAACACCAACGATCCGGATAATCCCCAACTCACGGTGTCCCTGACGCTCGAGGTGCTGAACGCCCTTCCCGTCATCGAGTTGCCGGCTGATTTGAGCTTCGATATGAACACCCAGTTAGTGGAAGATTTCTCCGACTTCGTCAGCGACGCCGACGGACATGATCTCACCTTGGGTTACAGC…
29408	c_000000007515	1136	2003	f	N-terminal of Subtilase family	PF16361	ATGCGCAAATTAACAATTCTTGCGGCCATCTGCCTGGCGCTTCTGAGCGTTGGCCTCATGGCCCTGGGTCCGGATTTCGCGGACCTGCCCTTTATAGACATTTACGAAGTGCCGGACGGCGCTATGGTTCCCGGCCATGTCTGGATCAGACTGAAACCGGAGCTTTCCGGCCAACTGCAAAGGCTGGAGCATACAAACGGGACACTTGCCTCCTTTGGCATTGCCGAACTGGACGAACTGAGCCGCCGGTTCGAGGTAAGCAAAATCAGCCAGCTTTTTTACAGCCCGGCCCACAGGGGCGAATTCACCCAGCGGCACCGGGACTGGGGCCTGCATCTTTGGTATGAGATAAGCTTCTCCAGCAAAGCTGACATCCGGGACATCGTGATGGCCTACCGT…
29409	c_000000007515	2100	3585	f	Subtilase family	PF00082	GTGTACAACCAGTCCGAACTTAACGCCATCAACTATTTCAACGCCAACGGCGGCGGTACTGTTCTGAACGGTGGCGTCACCATCTTCGCCGCGGGCAACGATGAAGCCGAGGGAAATTTCTATCCTGGCTGTTACAGCGGCGCTTTTGCTGTGGCCGCCACCAACAACCAGGACAAAAAAGCCTATTACTCCAACTGGGGAACTTGGGTGGACATCTCCGCCCCGGGTGGAGAAACGACATATTATTCCACAAGAGGAATTCTCAGCACTATAACAGGCAACAACTACGCCTGGTACCAGGGCACCTCGATGGCCTGCCCGCATGTGTCCGGAGCGGCGGCACTCATTATATCCTACGCCCACCGCAACGGGCTCACGCTCACCAACACGGAGCTGAAA…
29410	c_000000007515	4342	5122	f			GTGTCCGTTCAGCTTGTGGTGCAGAACAGCAGCCCGACAATCAACGCGCCGGAATCACTGACCTTCGACATCTATGCCGACACCGCCCTGATCGAGGACTTCAGCCCCTACGTGGATGATTTGGATCCGCAGACTTTAACGCTGGACTACAGCGGCAACAGCAACATCCTCGTCTCCATCGACGGGCTCATGGTCACCTTCAGCAGCCTTAATTATTGGACCGGCACGGAGGAGATCACCTTCTCCGTCCATGATGGCATGGCTTACGCCTACGACACGGTTTCTGTTACCATCACCCAGATCATGTATCCGCCCACGAATCTCATCGCCCAGGCTGGAAACAGGGTGGTAAACCTCAGTTGGACCGCTCCTGATCCCGCTGGTGTGAGTGGCTACAGG…
30069	c_000000007679	1	484	r	Glycosyl transferase family 21	PF13506	ATGATCGAGGCCTTTGCCGATGACGTATCCATGGTCGCCGGTTATTCGCGCACCAAACTTGAAAGCTGGGATAAGGCGTCCCTGGTGCAGAAATACGAGCATTTTGACTTTGCGGGCACCTATATGGTGTTAGGTGGGGGTTACACGATCGGTAGAAGCTGGGCCTGCATAGGTCAGAATCTGGCTTATACCCGGGCTGCTTTTGAGTCTGTGGGGGGCTTTTCCAAAATCGAACATCTGATCTCCGGGGATGACGTCAACCTGCTGCAACTTATGCGCCGCACCGGACACCGGATCATCTTCAATTTCGACAAACGGAGTTTTGTACACACACTTCCTGTCAAAAGCTGGAAACAGCTTACCAACCAGCGCTCCCGCTGGGCGTCAAACATGAAGTAT…
30070	c_000000007679	461	935	r	Glycosyl transferase family 2	PF00535	TTGCTGCGCGATATACTCTTTGTGATTCTCTGCTTTTTGATTGGCTCCGGCTTTGTCACCTACATAGTTTTTTGCATCCGTTTCTGGTTTGGCTACAAGAATTACACCCCAGTGAAAAGCTTCCGCAAGCGTACTGTCTCGGTGATCGTGGTTACCCGCAATGAAGGCAGGAATCTGCCCACCTTGCTTACCGCGCTGGTCAATCAGGATTACCCTCGGGATCTGTATGAGATCATAATTGCCGATGATGCTTCGGAAGATGACACCGCGGAGCTTGTGGCCAGACACATGGATCTTGGAGTCAGGCTGCTCTATTTAAGCATCCCCGGCCGGGACAAAGTGTTTTTCTCCCAAGAAAAATGCGCTCAAGCAAGCGATAGCTGCCTCCAACGGAGAGAT…
30071	c_000000007679	946	3016	r	Transglycosylase	PF00912	ATGGCGATTAAAAAGACCAAGAATTGGAATAAGTTCCTAACATATGCAGGCATAGCCTTTTGTGTGCTGTTTGGCATCTTCTTGGGAGCCTTTTGGTTCTATCAGGATGAACTGCCGCCCACCAGCGAGTTGCGCAATTACACTCTGCGCACAGGCAGTGAAGTGTACGATCGCAACGGCCGCATGATCTATATCTTTGCCTTCGAAAAGCGCAAGTTGGTATCACTCAAAGAACTGCCCCCCCATCTGATCGACGCCTTGCTGGTAACCGAGGACAAGAGGTTTTACAGCCACTTTGGCATCGATCCAATCAGCAACGTGAGAGCCCTGCTGGTCGATATAATCACCATGGATTTCTCGCAGGGTGCAAGCACCATTACCCAACAAATGGCCAGGAAT…
30072	c_000000007679	3005	3533	r	Heptaprenyl diphosphate synthase component I	PF07456	ATGAATCAGCCTTTCAACAAAGCTTTACTCGTGCTTGCCTTTCTCACTGCCACAGCCTGCAGTGTTCAGATCGCGGAAAACCTGATCATGCGCTTGTTGCCTCTACCCTTTATCCGCATAGGCTTGTCCAACGTTATAATCCTCTATCTGATCCAGCGAAAACAGGTTCTGAACGCTGTAATTGTCAATGTCACCAAGTCTTTGGTGGGTGGATTAGCCACCTTTACCCTGCTTAGCCCTGGTACCCTGCTATCTCTGGGAGGTGGCTTCGCGGCTGTGCTTGTGATGTGGGCAGCAGACCGTCTGCCTCTGGGGTTCAGCGTTTTTGGCATCAGTGTCCTGGGAGCGGTTGCCCACAATCTGGTCCAGCTCTCGATCGTGAAAAGCGTCGTGTTGCCT…
30073	c_000000007679	3529	4255	r	ABC transporter	PF00005	ATGATAAAAGCAGATAGTCTCTGTCTGAGTCTTGGCGGACGGCCTGTCCTGAAAGACATCAGTTTTACCCTGGAAGATACCGATAATCTGATCATACTCGGCCGCAGCGGTTCGGGCAAGACCGTCTTGATCAAGACTCTGATGGGGCTCCATGTTCCCGATTCCGGTACGGTCACGGTCGATGGCAGGGATGTTTACGCGGCGCGTAATCTCTCCAACGCGGAGTTGAAGCATGAGTTTGCCATGGTGTTTCAAAACGCCGCCTTGCTGGATTCCTTCACGGTTTTTCAGAATGTAGCCCTCCCCCTCTTTGAGCGGGGTGAAAAGGACTATGCCAGAGCTTTGGATCGGGCCACCCGCTGCCTGGCGATTGTGGGTTTGGAAGATACCTTGGATAAA…
30158	c_000000007700	2	161	f			ATTGTCAGCTATGGTGGCGGGATTGCGCACGTCGTCTTCTGGTATTTCGGCTTCCACTTTTCCCACCAGGTCAGCACCTACATCAGCAGCTTTGGTAAAAATGCCGCCGCCCAGACGGGCGAAGAGGGCCTGGGTCGATGCTCCCCATGCCAAAACTGA
30159	c_000000007700	187	799	r	Inorganic H+ pyrophosphatase	PF03030	ATGCCAATATTTTTCATTGACAGGATAGGGATGTATTCGAGTCATGATCATACTATTGAATACATTGCCGTAACAGAAATTCGGGAATTAACATACAATTTTACTTCTGAGGTTTTATCAATGGAATTATTAGGATTACCGATATTATGGTTTGTTGCTCCCCTTGGAGCTTGCATGGCCTTGATCTTCGCGATGGTATTCTTCTATCAAGTAAAGAGCGCAAATCCAGGCAACAGCAAGATGATAGAGATTGCAACCTACGTGCGCGAGGGTGCGCGTGCCTATCTAAAACAACAATACAAGGGTGTCATTCTGTTTTTTATCGGGGCATTCATAGTTTTTCTGATAATGGCCTTGGGTCTAAAAGTGTTACACTGGTTGGTGCCCTTCGCTTTTCTA…
30160	c_000000007700	915	1983	f	PCRF domain	PF03462	GTGAGATCAGGAGGTTACTTTGATCGGGATAAACAGGAAGAAATAGCATCTCGTCTGGAGCTGCAAGTTAATAGTCCGGATTTTTGGACAGACCAGACGGAAGCAAAAAAGATTACCAAGCAGCTGAGTCTGGTCAATGAACAGATTGAACACATCAACACCCTTGATAACCTCAGAGATGAACTGCAGACCTACATCTCTTTCCTGGAAGAGGACTTTAACGAAGATCTTTTCGGTGAAGCCATCAAATCTCTGGAAAATCAGCGCCAGTTCATAGAAAAAGCGGAGATTGAGTGCTACCTGAATGGCAAGTATGACCGCAACGACGCTGTTTTCAGTATCCACGCGGGCGCTGGAGGTACTGAAGCCCAGGATTGGGCAGAGATGCTCTTGCGCATG…
30161	c_000000007700	1979	2132	f	Putative undecaprenyl diphosphate synthase	PF01255	ATGAACTACAAGGACTTAATCCCCGAGCTTGATACTGCAAAACTACCGTTACATGTGGGAATCATCATGGACGGTAACGGACGTTGGGCAGCGCAAAGGCGCAGACCCCGGATCTATGGACACCGGGCAGGGCAAAATCGATCAGGCAGATAG
30162	c_000000007700	2174	2645	f	Putative undecaprenyl diphosphate synthase	PF01255	ATGCTTTTTCCACAGAAAAACTGGAACAGACCTGAGGATGAAGTCAGAGAATTGCTGAAAATGCTCAAGGAACAACTGCTGAAAGAGATTCCCGAGCTTAATAAACAGAATATCAGGGTTGGCTTCATTGGCAGCGACATCAAGCTTGACCCTCAGTATCTTAGAGATATTCACAAATTGGCAGCCATGACAGAAAAGAATACAGGTATGTATGTCAACATTGCCTTCAATTATGGAGGTAGGCTGGAAATTGTGGAAGGAATCCGGAAACTGGTTCAAGACGCAAAGCAAAAGGAGTACCTGATCGAAAATCTCACTCCTGAGAGCTTTTCCAGTTATCTCTACACTGCCGGGCAGCCTGATCCGGATCTGATAATCCGTACCAGTGGTGAAAAACGA…
30438	c_000000007773	229	805	r	Cytidylyltransferase-like	PF01467	ATGACAAGCTGCGCGCTGCTGGGCGGGAGCTTCGATCCCATCCACAACGGCCATTTGCATATTGCCAGAGAAATATTGAAATCCGGCTATGTGTCACGTCTGGTCTTTCTTCCCAACGCGCGCCATAACTTCAAAAAGAGCAACGTAGTGCTGGATTTTCAGCATCGCCTGGCTCTGGTGAGGGACGCTCTGGAGCCTGGCATGGAAGCTTGGGAAGACGACGCGGACGGATCGGGCTATACCGCGGAACTGCTCCAGAAGTTATACCGGAAGCATCCGCAACTGCTCTTCCATTTTGTGATAGGATCCGATAACCTTGCCAATTTGCCTCTGTGGTACGATTTTGCCTGGTTGAGGGCTAATGCCAGGTTTCTGATCATCCCCCGTCCCGGTTATCCG…
30439	c_000000007773	801	1524	r	Outer membrane lipoprotein	PF13525	ATGAATAAGGTTCTGATAATGTTGTCGCTGGCGCTGCTAATCCTCGGCGCTTGCTCGACCAACAAGACCTATCTGAATACCGATCAAAAGCTTGCCAAGGCGGATCAACTGTTTGCCCGAGGCAAGTATTCGCGTGCGGCGGAACTGTATTCCGAAGTCTATTTTGAAAGGTCTTCCGCCTCCTCGGCGCATGCTCTGATGCGCCAGGGCGACAGCTATTTCAAGATCAATAAATTCGCCGATGCCAGGAAGGCCTATGAAGAGTTCATGGATGTGTTTCCCAACCATGCCCAGGTGAGCGACGCGCATTTTCAGTACGCTCTCTGCCTGTATGAAGATTCACTGCCAGCCCATTACGATCAAAAAGAAACCTTGCACGCGATCGACTCGTTCAAGGAA…
30440	c_000000007773	1538	2153	r			ATGATGGCAAGAATTGAGCGGACAGCAAGCAGGGCATTGCCAGGCATCTGCTGTCTGCTTTATTTGCTGCTGGTTACTGCCATTGGCGCTACGGCTACTGGATTGGACCCGGCAGAACCGGAACTGATCAGCCAAAAGATAGTGGACCTGATCGAACTTGGCGATCCGGTCTATTTGGATATCCAGGCGGGCGATCTCACCTCCAAGCTGGATTTCCGCATCCGTCAACTGCTGATCGCCAAAGGCGCGGACCTGCGGGAAAGCGAGCTGGATTTTCCGGAAGATACGCAGGCGGATACTTTGGGTGTGCAGCCGGTTTCCAGCCTTGCTTCCACGCCTGCCCGCCTGATCAGGATACGTATGGAACTGGACTGGACCACCCAGGAAAAGCGCAGTTTT…
30441	c_000000007773	2158	2371	r	Aminopeptidase I zinc metalloprotease (M18)	PF02127	GTGGACGAAGGCGGCGGCGGAACGATCGCCTACATCCTTGCCAACCTGGGCGCAGAAGTGATAGACTGCGGCACGGGACTGATGGGGATGCACTCCCTGTATGAACTTTCCAGCAAGGCGGATATCTATTCCACCTACTGCGGATACAAGGCTTTTTTTGGCATCCGACGAATAAGCGAAACAGCGCTTTGGAGCAAATTGGAGCCAGCCTGA
30442	c_000000007773	2310	3609	r	Aminopeptidase I zinc metalloprotease (M18)	PF02127	ATGAACAAGAAACAAGATAAAAAGCTGTTCTACCAGCGCAAGAACTTCTGGAAGGAAGCAACTCCTTCCACAATCAACAAGGCTTTCGCTTTCGCGGAGCCATACATGGACTTTTTGAACCAGGCCAAAACAGTGCGCGAGGCCGTAGCTTACACAGAAGCACTGTTGAAAGAGCACAAGTTTCAGAGCATCGGGGGCAAAAAAGGTTCCCGGCGCCTGTATCAGATCTTCAGAGGCAAGACCATCGCCATGGCGGTGCTTGGCTCCGAGCCGCTTAGCGAGGGATTCAACATGGTGGCGTCTCACATTGACGCGCCCAGGGTGGACCTGAAACAGAATCCGTTTTATGAAGACAGCTCCAGCGGCATGGCCTGCATGCGCACCCATTACTATGGGGGC…
30443	c_000000007773	3639	4122	r	Transcription elongation factor, N-terminal	PF03449	ATGATGGATCTGAGCCTGTTTGTAACCCAGGAGGGGATGGAAAAGATACAACGCCGCATCCAGTTTCTGTTGAACGAAGAGCGGCCGGAAGTGATCAAAGCCCTGATGACCGCCCGTGAATTCGGCGATCTGAGCGAGAACGCGGAATATAAGGCCGCGCGAGAAAAACAGAGGCAGATCGACACCGAGATCGATCACTTGCGGCGGCGCTCCGCCCATCTGAAAGTGGTGGACACTTCCGTCTTTCCCAAGGACGCGGTACGCTTTGGGAGCCGTTGCCGGACCCGCGAGGAAAGCACCCAGGAAGAAGTGGTCTATCGCGTGGTGGGAGTGGACGAACTCAACTATTCAGAGGAAGAAGGAGTGCAGGTCGTTTCGGTGCTTTCGCCCATCGGCAAG…
30444	c_000000007773	4121	4928	r	DNA alkylation repair enzyme	PF08713	ATGCTTACCATAGAGTGGAAAGAAAGGCTGAAAAAGGATACAGCTGACTATTTGGAAAACAAGCTGCCGAAGCACGACTTCGATTTTGAGATTATCTTCATCGCATATCCGGAAAGGGTAAATGGTAAGCTCCCAAATGATGTCATCGTGCATGTGGCAAAATCCATCGTGCAAGGCTTGGGCAAAGCGCACGACAAGCATACCGCTTTTTACAAACACCTGTGGAACAAAAAGGGCGAGAACGGGCGCCTGGCCTTCATCGCGATCATGGCCAAGTTAGCCAGCAAGAAGCCAGCGCTCTATTTACCTATGGTGGAAACCGCCATGCAAACCGCGGAAAAGGCAGAACTGACTTCCCTGCTGGATAAAGTGATGCTTCCGCTGTTACGCAAAAAACCT…
30445	c_000000007773	5000	6632	r	SNF2 family N-terminal domain	PF00176	TTTTTGCACACAGAGGACGGGCGGCTGCTGTATATTGTCAATCCGGAGGTCTATCGCGAGACGGAACTGCTGCTGCAACGCAGCGAAAAGCTCGCCGATTCGGTGTATCGCGCCCGGATGATCCATCTGCCCTACTATCAACGCTATATGCGGGAGAACCCGGCTTTCCGCATGCTCGGGGATGAATGGATGGAACTGCTTTCCAGAGACCTGCAGCGCGGGCATCTGGAGCATACCCCGCCTCTGCCGCTGTATCTGCAGACCGTGTTGAGGGGCTACCAAAAGTCCGGCTTCGCCTGGCTGAAGATGCTGCAACACTATCGCATGGGCGGTATCCTGGCAGATGAGATGGGGCTTGGCAAGACGATCCAGGCATTGTCCGCCATCCTGATGAGCCAG…
30685	c_000000007853	1	109	r	Peptidase family S41	PF03572	ATGGGCAAACCGACTTTTGGCAAGGGCAGCGTGCAACAGCTTTTCCCTCTTGCCAATGGCAACGGCATCAAGATCACCAACGCCTATTACTACATCAAATCGGGACGC
30686	c_000000007853	108	1062	r	Peptidase family S41	PF03572	GTGAACGATAAAAAACAGAAAACAGCTTTAATAACCATAGCCATCGTCTGGATCCTTGCTGCCATCATGCTGTTTGGAGCCACCTCGGCATTTGCCCAGAACAGCAGCGGCGGCAGCGACCTGTATTCCCAGTTGGGTTTGTTTAGCGATGTCCTGAACAAGTTGAAACAGAACTATGTTACCAATCTTAACGACGAAGAACTGATCAAGGCTGCCATCATCGGCATGTTGGGCTCCACGGATCCCCACACCACCTACTTTACAAAAGCCGAATTCGAAGAATTTACCACCGCCACAAAAGGCTCCTTTGGAGGCCTGGGTATCCAGATCGACAAGGTGGGAGACTACATCACGGTCATCTCCCCCATCGAAGGCACTCCGGCTTACCGCATGGGCATC…
30687	c_000000007853	1058	1682	r	Thymidylate kinase	PF02223	ATGAAAGGTCTATTTGTCACATTCGAAGGCATCGAGGGCAGCGGCAAAAGCACCCAGATGAAGATGCTGGCGGCAAAGCTGGAAGAACTTGGCAAACCCTCGCTGCTGACGCGTGAACCCGGAGGCCCTCCCATCGCGGAAAGCATCCGCGCCCTGCTTCTGGATCCCGGTAACAAAGAAATGCTGCGCGAAACGGAGCTGTTGCTCTACAGCGCCAGCCGTGCCCAGCATACCGGCCAGTGGATACTGCCTGCTCTGCGCGAGGGCAAGATAGTGCTTTGCGACCGCTATTACGATTCCACCATCGCCTATCAGGGCGCGGCACGTGAGCAAAACCTGGATTTCATCGCGGTGCTGACCAGATTTTCCACCTTCAACACAGTGCCGGACATCACCTTT…
30688	c_000000007853	1697	3296	r	FAD binding domain	PF00890	TTGAGAGACTATGATTTTCTGGTGATCGGAAGCGGAATTGGGGGTTTGGTTTATGCGCTGCAGGTTTCACGCTTGGGCAAAGTGGCAATTGTGACCAAACGGGGCTTATTCAACTGCAATACAGACTATGCCCAGGGGGGCATAGCCGCTGTGCTGGACGAAGCGGACACATTTTCCGGCCATTGTGAGGATACTTTTATCGCCGGCGCGGAATTAGGCAAGCGGCAGGTGATCAGGCAGATCATTACCGAAGGCCCAAAGCTGATTCAATACCTAATCGATCTGGGAACTGATTTTACCCTCGAAAAAGAACACTATGACAACCGCCTGGAAAATCTATCCCTGAGCATGGAGGGGGGCCATAGGCACCGGCGCGTGGCTCACGCGGCAGATTCCACC…
30689	c_000000007853	3292	3718	r	Acetyltransferase (GNAT) family	PF00583	ATGCGTCAGGATGACCTGCCCGCCGTATTGCAGATCGAAAAGCAGGTGTTCAGCAGCCCCTGGCCGGAAGATGCCTTTAGCAGCTCAGACTTTGGGGAATCCTGGGTGATCTGTGAAGATGCCACCCTGGTGGGTTATATAATGTATCACAATGTGATCGACGAAAGCGTGATCATCAATCTGGCGGTCGATCCCGCGTATCAGCGCAAGGGTTATGGCAAGGAACTGCTGAAAAACACGCTCCACCAGCTAACAGACAGGGGATTCACCCACTTTTTCCTGGATGTGCGGGTGTCTAACCTGGCTGCGCTAGCCCTGTATGAAGGGTTTGGTTTCCAGCGCGTTGGGTTGCGCAAAGGATATTACACCCTGCCAGATGAAGACGCCTATGTAATGGCA…
30690	c_000000007853	3704	4568	r	DALR anticodon binding domain	PF05746	ATGAAAAGGAAGACGCCATCTGGTTCACGCTCCATCCAAATTGGTGACGATAAAGACCGCGTATTGATGAAAAGCGATGGCTCGATCACCTATTTTGTTCCCGATCTGGCTTACCACCTGACCAAAATCCAAAGAGGATTCACCAAACTGATAGACATTTTTGGCCCCGACCATCATGGCTATGTACCCCGACTGAAAGCGGCCTTCCAGGCTCTCAAATACGATGAAAACATGCTGGAAATCATCTTCCTGCAACAGGTTAACTTGTTTGAAAGCGGAGAAAAGGTCAAGATGAGCAAAAGAGCCGGCAAGATTGTTACCATGGACGATCTTGTGGGCGTGGTGGGAAAAGACGCGGCTCGTTATTTCTTTATAGCGCGCAAAGCAAACGCTCATCTG…
30691	c_000000007853	4521	5016	r			TTGAATATAGTCAGTGCCAGGGCAGCCGCTTTTGGTGACACCCTTTATCGCGTCATGAAGAAAGTTGGCTACCAACCCTCGCGAGAGTTCTATATCAACGACGCGGGCAATCAGGTCGATATCCTGGCGGAAAGCCTGGAGCTCAGACTGCGTGAGATACACGGCGAAAACATCGGCGAATTTCCCTATGACGCCTATCATGGCGAGTATGTGAAGCATCTGGCCCACAAACTGAACGCCACCGAGGGAGTGCGGGTGTTTATGATGCCTGAAAAAGAGCGCACTGAACACCTGAAGGAGTTTGCTCTCAACGAGATGCTTGAGATGCAAAGGCAGTCTCTGGAAAGATTTGGGGTTACCTTTGAAAGCTGGGTCTCCGAGAAAACCCTGCGCATGGAA…
30692	c_000000007853	5012	5399	r	Arginyl tRNA synthetase N terminal domain	PF03485	ATGATCAAACACCTAATACATGACAACATCTGCAAGATTTTGCAAGACCTGAACCTCAGCCAGCAGCGCGAGTTCACGGTTGAAATACCCAATCTGGCCGACCATGGGGATTATTCTTCCAATGTGGCTATGATCCTTGCCAAAGAGAACAAGACATCCCCCAAAGTGCTGGCTGAAAAGCTGATCAAGGAATTGAAGAAGAACAAGTATTACAAGAAGGTGGAGCTTGCTGGTCCCGGATTCTTGAATTTCCATCTGTCCAAGGTGCTGTATCACAATATGCTGTGGGAGATCCACAAAGCGGGGCAAAGTTTTGGAGACTCAGAGTTCGGCCAGGAGGAGAAGTTCTGCTGGAATTTGTCAGCGCGAATCCAACTGGACCTTTGA
30693	c_000000007853	5376	5748	r	Ribosomal silencing factor during starvation	PF02410	TTGTTTGACAATATCAAGCTCGAAGCCATCCTGGAATGGCTGAACGACAAGAAAGCGGAAAACATCCGCGTGTACGATGTGGAAAACATCATCGACTATGCAGATGCGATAGTTGTCTGCGAAGGTACCGCCGATCTGCATAACAAAGCTATCGCCAACCATGTGCTGGATATGGCCAAGGAACACAAACTGAGCGTACTCGGCAAAGCCGGGCTGGAGTTTGGGCAGTGGATCCTGGTCGATCTGGGAGATGTGATCCTGCATATATTCTTGCCTGAAAAACGTAATCTCTACAAGATTGACCAGTTATTTGAACAGCTTTCAAGCCACAACAAGGAAGGGCTTCCGCATGATCAAACACCTAATACATGA
30694	c_000000007853	5797	6244	r	LytR cell envelope-related transcriptional attenuator	PF13399	TTGAATTTGACAATAAACGGTGTTTCTGAAGATTTGACCCCTAAGCGTCCCTGGCGCTATCTGCTGATTCTGGTCTTGTTGATAGCCTTGGCTTTGCTTGCATATTTTACCGGAGTGTTTGGCTTGCTCGGGCGTAATCAAGACGACGAGGAGAGCTTGCCAGCCATTCGGGTGGAAGTGAGCAATGGTTGTGGCATCGAAAAGCTGGCAGCAGATTACAGCGTGTATATCAGGGACAAGAATATCGACGTGCTAAGGGTAAGCAGCACCCCCTACCCTATTTACAACAAATCGGTGCTGGTTCTCATCAACGGAGATGAGCAAGACCTGCGGCGCCTGCAAAGGATGACTGGCATCCAGCGTTATACGCTGGCACGTAATCCCGAGTCGGATGTCCAG…
30695	c_000000007853	6248	6737	r	HIT domain	PF01230	TTGTATTCTCCCTGGCGCTCGGACTATATCCGCTCGCCCAAGCCGAAAGATTGCATCCTTTGCCGCTGGCAGGATACCGAATCGGATGCCGAAAACCTGATCTTTTACCGGGGCAGGTTTTGCTATGCCATGCTCAACCGATATCCCTACAACAACGGGCACATCATGCTGGTTCCCTACAGGCATTGCGCTTCGCTTTCCGAGCTAAAACCGGAAGAGCTGGCAGAGTTGGGTCAACTGGCACAGCAAGCCGAGATAGCCCTCAAGTCCGTCTATGCCTGCGAAGGAGTGAATCTTGGGATGAACCTGGGCAAGGCGGCCGGGGCCGGAATCGACGAACACCTGCATCTGCATATGGTTCCCCGCTGGAGCGGAGATTGCAATTTTATGAGCGTGATC…
30696	c_000000007853	6744	7092	r			CTGGCGTCAACTCTCAGGAACAGCTCGCGGAACTGGAAGACCTCTTTTGTGGACAGAATCCGCCGCAAATGGATGAACAACGGGGTGGTGATCCACAATCCCAATACCGTGTATATAGATGATGAAGTTGCCATCGAGCCGGATGTGGAAATCTTCCAAAACTGCATCCTGAAAGGGAAGACAACAGTGCGGACAGGATGCTCGATCGGGCCGAACAGCCTCATTTCCGACAGCTATGTCAGTGAAGACTGCATCCTGGAAGGGCACAACATTTTGGTGCACGCGCACGTTCCGGAAGGACACATCCTGGGTCTGCGCGAGCAATTCATAGAAGACCCCTATGAATAA
31801	c_000000008154	290	2426	f			GTGCCCTTGAATTATACCTTCGATTACAATTCGGATGGCCTGCCAGAGTATCTGGCAATGGATCTCCCCGCCAGCGGCTACGGCAACGTTTTGGCTTATCAGCCCCAGCCGGGCGGACACGTGGTGAGCCACTCGTTCAACGACAGCTTCTGGCTGTTGGGCGCGGGCGACACCAACAATTCCGGACAGGAAATCCTGATGTTGAGGGGAGACACCGCAGTGATCCTGGAAAGCCATGGCTCGAGCCAGTATCCAAACCTGCCCCTCTGGGAGGAAGCATCCGTGACAGGAGGCACCATTGCCGACTACTCCGGGGATGGCATCCAAGACGTACTATTGGTCAAAGACCTGGCCCAACAAAGGATAATACAGGCTTACAAGCGCAGCGGAAACACCTTT…
31802	c_000000008154	2422	2560	r			ATGCAGGAATTTGAGAAACATACACACCAAAATGAGCGATTGGAGTATTTGGTATCAGCGAATGATGGCCAGTTTGCCGCGCGCGATGTCGCCATCCATTTCGATCAAGTAGAAATAGACTCCCGAAGAAAACGTTAA
31803	c_000000008154	3353	3656	r	Glyoxalase/Bleomycin resistance protein/Dioxygenase superfamily	PF13669	GTGCCTTCCCAAAAGGTGAAGGTTGCCTTCTTCCCCTGCGGCGACACCCGCATCGAGCTGCTGGCGCCCACCTCCGAAGACAGCCCGGTGGCAAAGTTCATCGAAAAGAAGGGCGAGGGAATTCAACACATCGCCTTTGCGGTGGATGACCTGCCCAAAGCACTGGAAAAAGCAGAGGAAAGCGGAGTTACCCTCATCGACAAGGAACCCAGACCGGGAGCCCATAACGCGGATATCGCGTTCTTGCATCCCCGTTCCACCCTGGGGGTTTTGATCGAACTCTGCAAGGAAAACAAACACTAA
31804	c_000000008154	4124	4316	r	Pyruvate ferredoxin/flavodoxin oxidoreductase	PF01558	ATGACGAACTATGAGATTCGCCTTTCAGGAAGCGGCGGACAGGGCTTGATCCTGGCAGGGATCATCCTCGGACGCGCCGCTGTGCTCGACAAACGCAGGGTTACCCAAACCCAGAGCTACGGCCCCGAATCACGCGGGGGGGTCTTCCCGCGCGGATGTCATCATCAGCGACCAGGAAATCTACTTTCCTGA
32496	c_000000008336	146	2807	f			TTGGACATTTTGAAGTTTTCGGTGATCCAATTTGAAGTTTTCACTGACACATTACACCAGACCTTCAAACTCAACAAGGATGAGATACAACAGCTTGTGCCGGTACTGCTGGACTTCACCGAAGCCAACAAAGCCACCGGAATGTCTGTGGAATCTGCCTTCGATCTCATGGGTCGGGCTCTGAATGGACATACCGAGATGTTGGGCAGATATGGCATCGAACTCGATGATACCCGTCTGAAGACAGAGGGTGTCTCTTATCTGGTCGAGAAGCTTGGTGAGGACTATGGCGGCACATCTACGGCTCTGGCTGATCTCAGATTGCAGAATACCAATGCCTGGGGAGATATCCAGGAGACAGTGGGTGATATGCTTACCACTCTGATCAATCCCCTCCTT…
32497	c_000000008336	2806	2875	f			ATGCCTAACCTCTTCAAGATCGACTTCATTCAAGGCAAGACCGATGCTTCTGACTATAACCAGGTCAAG
32566	c_000000008359	2	533	r	Pantoate-beta-alanine ligase	PF02569	ATGAAGATTTGTAAAACTATCAAAGAAATGCAAGCCGAGGTCTCCAAGCGGGACCGGAACAAGACATTGGGCTTCGTGCCCACAATGGGAGCCCTGCATGAGGGGCATCTTTCATTGGTGAGGCTATCCAAATCGAATTGCGACCTGAGCGCCGTTTCCATCTATGTGAACCCCAGCCAGTTTGGCCCCCAGGAAGACTTTGGCAGATATCCCCGCAACCTGGAACGGGATTTGGCCTTGCTGGCTGACAACGGAGCAGATTACGTCTTTCTGCCGGACAATGAACAGATGTATCCAGCAGGATACAAAACCTGGGTGGAGGTGGAAGGATTATCCAGCATCCTTTGCGGAAACAGCAGGCCTGGCCACTTTCGCGGCGTCGCTACCGTCGTGCTGAAG…
32567	c_000000008359	529	883	r	Aspartate decarboxylase	PF02261	ATGCTAAGATCCATACTTTTATCGAAGTTACACAGAGGTACGGTTACCGAGTGTGACTTAAACTATAACGGCAGTATAAAAATCGATGAAGCTCTGCTGGATGTATCCGGCATGAAGGAATTCGAATACGTTGACGTGTTCGACATCAATTGCGGAGCGCGGTTTCACACCTATATAATAAAGGGCGAACGTGGTAGCGGGGTGATCGGAGTAAACGGCGCCGCCGCCCGTCTGGTTGAGCCTGGCGACAAGGTGATAATCGTAAATTGGGGGCTGATGGATGACGCGGAAGCATCCAGGCACCAGCCGAAGATCATATTGCTGGATGAATATAACAGGCCTGTGGCAAAATGA
32568	c_000000008359	1476	2784	r	Glycosyl transferase family, a/b domain	PF00591	ATGAGCAATTATAATCCAGTTGAGCTGATCCTCGCCAAACGCAGGGGGCAGACCCTCTCCCCGGGCGAGATCACGCAATTCATCCGCGGCTTCATGGCAGGCAGGATTCCGGACTATCAGATGAGCGCCCTGCTGATGGCGATCTACTTTCAGGGACTGGAAGCCTCCGAGATCGCAGCGCTCACCAAAAGCTATATCGACAGCGGCAGCAGCCTGTCTTTTCCCGACGCTCTGCTGGTGGCGGACAAACATTCCACCGGAGGCGTGGGCGACAAGATCAGCCTGATGCTGGCCCCCATCGCGGCGGCTTTGGGACTGAGCGTGCCCATGATCTCCGGGCGCGGATTGGGGCACACGGGTGGCACCCTGGACAAGCTGGAATCCATCCCCGGCTTCCGC…
32569	c_000000008359	2796	3519	r	Binding-protein-dependent transport system inner membrane component	PF00528	ATGGTCGGCTGGATCATCGTGGAGGTGAAGCCGGTGGCTTTCTTCACCCAGGCAGCCAACACCAAGAATATCCTGAAAGGCATCTTCAATCCCAATCCCAAGGAATTGGTGCCGATGCTGGCAGCCCTCACGGAGACCATCTATCTGGCGCTGCTGGCGACGGTCTTTGCCATCCCCTTCGCTTTCATTTTCAGCTTTTTCGCCGCCAAAAACCTGATGTATGGCAGCCTGCCGGGCAGGATCGCCTACATCGTTGTCCGCACCGTGTCCACGGTCTTCCGCTCCATCGAAGCGATCGTTTGGGCGATCATCTTTTGCGTCTGGGTGGGCATCGGGCCTTTTGCCGGGATGCTGGCGCTGTGGATTCACTCCATCGCCTCCCTGATCAAGCTTTATTCC…
32570	c_000000008359	4222	4501	f			GTGAAAAAACTGCGCTGCAACGAGGTAACCGGAGCCGACCATTGCCAGGAACTGATCGATTACGCGAAACAGACCGACCCTGAGAGCGGGATCAAATATATCTGCAGTGACCTGTTTGACAACATCGATGGACGTTTTGCGCTGATCGCTTTCAACGCCCCCTACATCGATGAGGACAGCAGCGAACAAACGGTATTATTTCCCACCGCGCTGAACCGCAAGCGCTTTTGCGGAGGAAAGGGCGGAGTGCAAACGATAGCCCGCTTTTTGCGGGATGCC
32718	c_000000008405	1	463	f			GCATCACCCGCCTGGCCAGGGCTTACAACAAGCATCACCCCCTCCAGCGGCAAGGTGTTGAGCGGCGGTATTGACGCCAACGGCCTGATCAAACCCAAAAAAGTTTTTTGCGCCGCCCGTAACACCGAAGAGGCGGGATCCCTCACCATTATCGCCACAGCCCTGATCGACACCGGCTCCAAGATGGACCAGGTGATCTTTGAGGAGTTTAAGGGCACCGGCAACATGGAGCTGGTTCTGGATCGCAGCATCTCCGATATGCGCCTCTACCCCGCCATCGATCTGGTGAAAAGCGGAACCCGTCGTGAAGAGCTGCTGCTCACCCAAAATGAGATCAATCGCATGTATGTGTTGCGCAAGTATCTGAAAACAATCAGCCCCATCCAGGGCATCGAAACT…
32719	c_000000008405	646	1606	f	Sporulation related domain	PF05036	ATGGACGCCAAAGCGAGAAACAAGGAAGAATCCTCCCTGCTGCTCTATCTGAATGCTATGCTCAGGAAAAGCAAGACTGATTCCGCCGCTTTGCTGGAAGACTGCACTCGCAAGTACCCCAACACCCACTATGGGCAACTAAGCATGCTGGAGCTGGCCAAGCTCCATCTGCAGGAACGGGATGCCAGCAAGGCAAAAAGCTATCTGCAAAAGATCACCTCGCAAGAATTGCTGGAACGCTACTATTGGCTGGCCGTCTGCGCCGAAGCGGACAACGATTTCAGCCTTGCCATCGCAAATTGTGAAACCTATCTGCGGCTTGCCCCAAGGGGCAAGTTGGTGGAAGAGGCCTATTTCCTGATCGCCGAAGCCTATCAATACCAATTCAAATACCAGAGC…
32720	c_000000008405	1613	4250	f	MutS domain V	PF00488	ATGAGCGACACGGGCAAACCCAGGGAAACCAAGTTGACACCTATGCTCAGGCAGTTTCAGGAGGTCAAGGAAGCGCATCCGGACAAACTGATCCTGTTCAGGATGGGCGATTTTTACGAAACCTTCTTCGACGATGCCTACCTCACCTCAAAGACCTTGGGCATCACCCTCACCACCCGGGATAAGAACAGCGCCGATCCGGTGCCCCTGGCAGGCTTTCCCTACCATGCTTTAGACCAGTATCTGGACAAGCTGATCAAGGCTGGTTTCAAGGTGGCGATTTGCGAGCAAGTGGAAGACCCTAAAAAAGCGGTCGGCCTCGTCAAACGTGAGGTTGTGGAGATCATTACACCTGGCACAGTTTTGGACCACACCCTTATCGATGGCAGCGCCAACAAC…
32721	c_000000008405	4246	5950	f	SurA N-terminal domain	PF13623	ATGAAAAATACTATTATTAGAATCCTCGTCCTCGCAATCTCGCTGGCTGCATTGACAGCCTGCGCCGCAAATCAGGAGAACCTGGCCGGTAAGATCAACGGCACCCGCATCCTCTACAGCGATTATATAGAATCATACCGCGGACACTACAACAACTTTCAGATCCTCAACAACCGCGCGCCCGACGCCATCGAAAAGGAAGCGATCAAGAGCCAGACCTGGACCGATGCCACCAAACACGTGGTGCTTAACGATTACTTCAAAAAATACGGGATTTCAGCCTCCAGCCAGGAAGTATTGGATACCCTCCGGGTAAACATCCCGGATTACATTCTGCGCTCCCCCCTTTTCAACATAAATGGCAAGTTTGACCGCGCCGTCTATCTGCAATCGCTGGAG…
32885	c_000000008448	2	458	f	Repeat domain in Vibrio, Colwellia, Bradyrhizobium and Shewanella	PF13517	AACGACCGTTCCTATCTATACGAGAACAACGGCGACGGCAGCTTCACTGACATCACCTGGCTTTCCGGGGCAAGAATCTACAATGGCTGGGGCAACGCGATGGGCGACCTGAACCGCGACGGACTGGCAGATATTGTGGTTGGAAGCGGAAACGGAACCAAGGTCCTCATCAACCGCACCCGCACCAAAAACAAAGCCCTGTGGGTCAAACCCGTCTGGGAAAACGGCAAACGGATACTGGTCAGGGACTGGAAAGAGTCCGTCGCCAAGCCAAACTCTCCTGCCTTCGGAACCCGGGTCAAACTGACATATATGGACAAAGGCCGCGAAAAAAAGCCTGATCCGGGAGTTGTCCTCCGCCAAGGGCACCTGCTCCCAGAGTTCACAGGAACTCATTTT…
32886	c_000000008448	444	561	f			ATGAGGAAGATTAGAACAACCCTCGTCAATCCCCTTAACAGGGACAGGCTGGAGATCCTGGGCGACCACGTCATCTCCTGCCAAGCTGGCGTAATAAGCGAAAAAACGCCCCTATGA
32887	c_000000008448	616	1702	f	Amidohydrolase family	PF01979	TTGATAGATGTCCACACCCATCTTTCCCAATACCGGATTCGCGGACTCTTTGAACCAGCTCTTTTTCCCTGGCTGGACAAGCATGTTTACCCCGCCGAAGCCCGTTCCTCAGACCCCGCTTACGCTCGGGGCATCGCGGAAGAGTTCTTTGCCGCGCTTTTTGCCGCCGGAACCACCACCTCCGTGATTTTCACCGCCCCCTTTGAGGTTTCCTGCCAAAAGGCGTTTGAAGCGGCATCCCAAATGGGAGCCCGAGCCTACATCGGGATGAGCCTGATGGATCAAAACTGCCCCGGGCAACTGCGACAGGATACGGACAACGCCATCGCCCTCAGCAAGGACTTGTTCCAACGCTTCGACACAGCAAGCCCCCTCTTGCGCTATATCCTCACACCCCGT…
32888	c_000000008448	1864	2410	r			ATGGTGTTCTGCTCTTCGTCCCCAGGCCCGTTGGCAATGGGGGATGCCGTTCACCGCCCAGACCGGATTGCCGTTGGCATCCAGACGCTGGCCGTAAAGGTCTTTGCTCGGGTTGCGGGAATCAGACCAGACAATGTAGGCGCCGCCCGCGTTGTCAGGTTCGATATTGAGCGAGATCTGGGTTCCGGTGTGCACGCAGACAGGCTTGCCTCCCATCTGCCACAACAGGGAGCCTTGATTGTTCACTTTCTGGGCATAGACATTTCCATCGGGATCGTCCGAAAAATCTATCCAGGCGATGATATAGTTGTTGTCGCTTGTGCGGGTGATGACGGGGTCTTCCTGGCGGTCGTGCTTCCCGTCCACCAACAGGGGTTCCCCCCAACACATGTTGCCGTT…
32889	c_000000008448	2478	3810	f			ATGCCAAAACGCTTCGACGCCAACGGCAACATGGTCTGGCCCCAGACTCTGGTTCTCACCGACGCCCCCGGCAATCAGGGCAAGGTGCGCATGGCTCCCATAGCTCCCGGCGAGTTTGTTTTCACCTGGGAGGATCAGCGCAACGCCGATCCCGATATCTACGCCCAAAAAGTGAATATCGCGGGTCAGACTTTGTGGTCTGATCCCTTTATCGTCTTTGGCGATTCCGGCACCCCTTCTTTCTGTCCCCAGCGCAACCCCCGCATTGTTGGCACTTCAGACAACGCCGTGGTGGTGGTCTGGGAAGACTTCCGCCTGGATGAACAGAACCCCGACCTTTTCGCGCAGAAGATCAACGCCGCTGGCAACCTGCTTTGGGGAGCCGGTGGAGTGGCCTTT…
32890	c_000000008448	3775	4108	f			ATGAAAGGGTCCTACTTCATTTGGGAACGCTATAACACCGCGGAATACACCCAAAGCGTTTACATCAAGAAAGTGGACGCCCAAGGCCAGGCCGATACAGGATGGCCCACGGAAGGTATGCCTGTCAGCACCTACAATTCCTGGGACAACGAGCAACGCACGGCAATCTCCGCCCTCACGGATGAAGGGATCTTTGTGATGTGGAGGGACAAAACGCACCGACTTTGTTTCCAATTATTACGGCCAACTCATATCCCCCCAGCGGACAGCGTCAATGGGACCCGCTTGGCGTCAATCTCGCGGATTACTCGCGGGAACAGGAACAGGCTGTGA
33185	c_000000008546	245	500	f	Ribosomal protein S17	PF00366	GTGGCACAAACCCGCAAAGTAATCAAGCAAGGAGTGGTGGTGAGCGACAAGAGCGACAAGACCATCGTCGTGAGAGTCCAACGCCAGTACATCCATCCATTATATAAGAAAACCGTGCGCAGTCATAAGAAGTTTATGGCGCACGACGAGAAGAATGACGCCCATGAAGGAGACGTGGTCCAGATAGCTGAGGCACGTCCCATGAGCGCGCGTAAACGCTGGATTCTGCATAAGATTGTGGAAAGAAGCAAATAA
33186	c_000000008546	512	881	f	Ribosomal protein L14p/L23e	PF00238	ATGATTCAAGCCCAAACGATATTGAATATCGCCGATAACTCCGGTGCCAAGAAAGCCATGTGTATCAAAGTGCTTGGCGGCACCAAACGTAAATACGCCTCCGTCGGCGACGTTATAGTTGTTGCGATAAAATCCGCCTCACCCGGCGGCAAAGTTAAGAAAGGCAGCGTGGAAAGAGCCGTGATAGTCCGCACCGCGAAAGAGATTCGCAGGGGTGATGGCACCTATATCCGTTTTGCGGATAACGCCGCCGTGATTATCGATGAAAAACTCGATCCCAAGGGAACCCGTATCTTCGGACCCGTGGCCCGCGAACTGCGCGAAGCCCAATATATGAAGATAGTGTCCCTGGCACCGGAAGTGTTGTAG
33187	c_000000008546	1217	1763	f	ribosomal L5P family C-terminus	PF00673	ATGAACCGTTTGAAAGAACATTATCAGAAAACAGTCGTCCCTGCCTTGCAAAAGGGCTTTTCCTACAAGAATCCGCATCAGGTGCCGCGTCTGGTAAAAATCGTGGTGAGCATGGGTGTCGGAAGCGCCACCCAAAACAAGGCCATCCTGGACAATGCCGTGAAGGACATGGAGCAGATCACCGGCCGCAAGGCGATCGTGACCAAAGCCCGCAAATCCATATCCAACTTCAAGCTGCGCCAGGGCATGCCGATCGGCTGCAAGGTCACCCTGCGCGGTGAAGTGATGTATGAATTTCTGGACAGGCTGATCTCGATCGTGATCCCCCGCCTGCGCGACTTCCACGGCATTCCGGCTGATTCCTTCGACGGCAGAGGAAACTATTCCTTTGGCCTCAAG…
33188	c_000000008546	1772	1958	f	Ribosomal protein S14p/S29e	PF00253	ATGGCAAAGAAATCCCTTATACTGAAACAGCAAAGAACACCTAAGTTCAAGGTTAGAAAATATAACCGCTGCATGATCTGCGGAAGACCCCGCGCCTACATGCGTGATTTTGGCATGTGCCGCCTTTGTTTCCGCAAATACGCCTCCGCGGGCCAGATCCCCGGAGTGACCAGAGCCAGCTGGTAA
33189	c_000000008546	1971	2412	f	Ribosomal protein S8	PF00410	ATGAGCGTAAGCGATCCGATAGCTGATGCATTGACCAAGATCCGCAATGCATATCGTGCCGGACATACGCAGGTGATTGTGAACCACAGCAAACTCATCGAGTCGGTGGTGAAGATCCTCGCTGCAGAGAATTTTGTGAATAGCGCCCAGGTTCTCGAGAAAGATCCGGAACATAAAATCAATTATAAAAGACTGCTGGTGATCCTGCGTTATACCAACGCCGGAGATCCAGTCATGCAGGGTATCACCAGGGTATCCAAACCCGGACGCCGTGTCTATGTCCGGGCAGAAAACATCCCCAGCGTGTATAACAACACTGGGCTGCGCCATCATTTCCACCTCACAGGGTGTGATGGTGGATCGCGACGCCAGGCTCAAACGCGTTGGCGGCGAATACAT…
33190	c_000000008546	2395	2686	f	Ribosomal protein L6	PF00347	ATGTCACGAATAGGTAAAGCCCCCATCAAATTCCCCGCCGGAACCAATGTGGAAGTCAAAGACGGCGTAGTCAAAGTCAAAGGCAAACTGGGCGAGCTTAGCTATACCCTGTTGCCCGGAATGAGCCTGGAGTTGCATGACGGAGTCATGAACGTGAAAAGGGCTGACGAAAGCAGATCTCAGCGTGCCATTCACGGACTGACCCGCGCCTTGCTGCAAAATATGGTTACTGGAGTTACCGATGGCTACCAGAAGACCCTGCACGTGATCGGCACCGGGATATTCAGCTGA
33191	c_000000008546	2690	2972	f	Ribosomal protein L6	PF00347	GTGGGGACCCTGGTTGAGGGCTCTCCCTGGGGATATTCTCACGACATCGTGATGCTGGTTCCGGAAGGATTGACCGTGGAAGCCGAGGCTGTGCCCCGTTCCAAGGGAACCCGTAGCGACCTGCAGAGCATCATCCGCGTCAAAGGAATCGACAAACAGCTTGTCGGCCACTTTACCGCTGAGATCAGATCCTGCCGCCCGCCTGAAAACTACAACGGCAAAGGCATCCGCTACGAAGACGAACAAGTAACCATCAAAGCCGGTAAGGCCGGAACGAAGTAA
33192	c_000000008546	2986	3067	f			ATGATAACTCAATCCAACATTAGAAAAAACGCCCTTCGTGAACGCCGCAGGGCTGCCATCCGGAAACGTCTGCACGGAACT
33357	c_000000008591	0	225	r	Tetrapyrrole (Corrin/Porphyrin) Methylases	PF00590	TTGCCTGCGGGTTGCGTCTATCTGGTGCCGGTTCCGATCGGCAACCTGGGAGATATTACCCTGCGGGCTTTGGAGACCCTGAAGAAGGTGGACCTGATCGCCTGCGAGGACACCCGTAACACGGGATTCCTGCTCTCGCAATATGAGATCAAGCCTCCCAGGCTGATCAGTCTGCACAAATATAACGAAAGGAAGCGGAGTTCGGAGATACTCGGATCCCTGCTG
33358	c_000000008591	245	566	r	Aminotransferase class I and II	PF00155	GTGATCGAGCTGCTCACCGGATCATCCGAGTTGCGCGACAAGGTGTGGGACAACGCGGTCTATTTCCGTCAGGAAATGGTGAAAGCCGGGTTTGACATCGTGGAAGGCAACACCGCCATCGTGCCGGTGATGCTTTACGACGAGCCTCTGGCCATGAAGATGGCTGACATGCTGCTGGAAGAAGGCATCTACGTGATCGGATTCGTGTATCCCGTGGTGCCCAAAGGCAAGGCCGCATCCGCGTCCAGCTTTCCGCCGCGCACAGCCGCGCCGATTTGGACAAAGCCATCGCAGCTTTCAAGAAAATCGGCAAAGAACTGA
33359	c_000000008591	562	1420	r	Aminotransferase class I and II	PF00155	ATGTTTGGCAAAATGAAAACCGATCTGCAAACCATGTTCGAAGATCTCAAGAAACAAGGTTTGTACAAGAACGAACGCATTATCACCACACCCCAGGGCGCAAACATAGGTGTAAGCACAGGACAGACTGTGATGAACTTTTGCGCCAACAACTACCTTGGCCTGGGCAATCATCCCGCCGTGGTAAAAGCCGCTCAGGATATCATGAACGATTGGGGCTATGGCCTGGCTTCCGTGCGCTTTATCTGCGGAACGCAGAAGATTCACAAAGACTTGGAGCAGAAGATCTCCGAGTTTCTGGGAACTGAGGACACCATCCTTTACGTTGCCTGCTTCGACGCCAATGGCGGCGTATTCGAGCCTCTGCTGGGAGACGATTCCGCCATCATCTCCGATGAA…
33360	c_000000008591	1705	2071	r	Preprotein translocase SecG subunit	PF03840	ATGGTACTATACACGATAGCGTTGATTATCCATGTGATCATTTGTGTCGCATTGGTGCTTGTGATTCTGGCCCAAAGCTCCAAGGGCGGTGGTTTGGACGCCAATCTGGGCGGAGCAGCCATGAACGTCTTCGGAGGTTCTGGCGCCTCGAAGTTTCTGAAGAAATGGACCCAGATCCTGGGTGTGTTGTTTATCCTTTCCTGCATCTTCATGGCCATCCAGGTAAACAAAGCCGCAACCGGTAAAGCGAAAGCGAAAGTCTATGACGAGAAGTTCGTGGACACTCAACAACCTGCCCCTGCCCCTGCCCCCGCTCCCGCGCCTGCGCCACAACCCGCTCCCAGTCCCGCTCCGGCGGCTGAATAA
33361	c_000000008591	2116	2872	r	EamA-like transporter family	PF00892	TTGCGATACCACGTTTACAAGAAAGGGAATCCGGCAGCTTTTATTATTGGGATTGCTGTTATTTTGCGCCTCGAGCCTGCAGCAAACTGGCATGCTCTGGACAAGCGCGGGAAGCGCGGCTTCATCACCGGCCTGTATGTGGTCTTTGTGCCTTTGATCAGCCTGCTGCGGGGCAGAAAGCTGTCAAAAGCCCTCCTGGTATCCATCCCTTTGGCAGTAATGGGTTTGTGGCTGTTGAACATGAATGTGGGGCTGAATGCCAACCTCGGCAATGGCCTTGTGCTCTTGGGCGCGGTTTTCTGGGCTTTGCATATTCAACTGATCGACCGGCTTACCCAGTTGCATTCAAGCCTTGACATCGCGGTGGCGCAATACGCGGTTTGCGCGTTGTTATCAGCT…
33362	c_000000008591	2890	3082	r	EamA-like transporter family	PF00892	ATGATGCTAATCAGGAACGGCAAGATTCTCTCCTATCTGAACCTCACGCTAACGGCGGCCATCTGGGGCTTTGCCTTTGTAGCCCAGCGCAGCGGACTGGAATCCCTCGATCCTTTCACTTTCAACGCCCTGCGCTTTGCCTTGGGCACCCTCTGCGTATGGCTGGTGAGAAAAAGTTGCCAGGCCAGGTGA
33363	c_000000008591	3081	3171	r			GGCTGGGGTTATGATCTGGGCTTTTATCTGGCCGTCGTGGGCGGGTTTGGCAGCATAGCCTTTAGCAGAAAACGGCGTAAACGCGATTAA
33516	c_000000008636	1	1075	r	Flagellar Assembly Protein A	PF03961	ATGAGTAAGATTTTAACTAACCCCAAAGGCACCATCAAGCTGGAACTGCGGGACGACCGTCTCTCAGCCTGGCTCACGCTGCAAGACCGCGACAACCTCATTGACGAGGAAGAGATTCTGGCTCTGATCGATGAAGCAGGCATCAAGACAGGATTTGAAGAAGCGCTGCGTTATATCCGTAAACACGGTCTGGAGAAGGACTTCAATACTCCTTTCCCGATTGCGGTCTGTGAGAGGGTCAAAGGCGAATCCAAACTCAACTATTACTTTGATCTGGAGCAGGCCAAGAGTTTTTCCGGTGTGATCACACCCGCTAATCTGGGCAACCTTGCCTGCATCGAAGAGGGTACTGTGCTGGCGGATTACAGCAGCAATATCTTCGACCGCCAGGGTTCCATC…
33517	c_000000008636	1067	1739	r	Multi-copper polyphenol oxidoreductase laccase	PF02578	TTGGGTAACCTGCAGCCGGATTATCTCAGCATTATGCGAGAGCAAAGCGATTTTCGGGTGGGGGACAGGATCATACCCGCTTCCCGGGTGGTGATAGCCGAACAGACCCATTCCGACTTGGTGCACGTATGTTCTGAGGCAGATTGCGGAGCTGGATTTGGCTCTCATCCTCAGATAGATGCTGTGGATGCCATGGTGACGAACATTCCCGGTCAATATCTGCTGATTCGCACTGCCGATTGCACTCCGGTGTTGCTGCATGACATCAGAGCCCGCGCCGTGGGAGCTGTGCACAGCGGCAGGGAAGGAACTCGGAAAAACATCGTGGGTAAAGCTGTGGCGTCTCTGAAGCAGCACTACAACGTGGAACCCCAGGATATAATAGCCTATATTGGAGCC…
33518	c_000000008636	1754	2633	r	Transmembrane secretion effector	PF05977	GTGGGACCTGCCATTGGCGGCGCGCTGATCATAGTTTTCTCGGAAGGTGTGTGTTTCGCGATTAACTCCGTCACATATCTGGCTGTGATTATATCCCTGCTGTTTATGAAGATCGATTATCCTCCCAGGCAGGCTAAAAATGAACCCGTGCTGACCAAGATCCTTGAAGGCTGGAAATACAGCTGGAAAAATGTGCCAATCCGTTTTTTGATCTTTAATCTGAGTTTCTACACTCTCTTTGGCTTGTCTTACGCCACGCTGTTGCCCATCTTCGCCCGTGATGTGCTTAAAGGCGATTCCAGCACCCAGGGAGCTTTGATGTCCTGCGTGGGAATAGGTGCCCTGGCAGGTGCGCTGTTCCTTGGTTCGCGCAAGACAATCAAGGGGCTGCTCCAGTTG…
33519	c_000000008636	2676	3120	r	Transmembrane secretion effector	PF05977	GTGAGAACAGATTACAAGCTTCCCTTCGCGTCGCTGTCGATTAGAAACTATCGGCTGTTCTTTATAGGTCAGGGTGTTTCACTGATCGGCACTTGGGTTCAAAGGGTAACCATGGGCTGGTTTGTCTATCGGATCACAAACTCGCACTTTCTGCTTGGCTTGGTCAGTTTTCTCAGCATGATTCCCACCCTCTTTATCAGCCCTTTTGCGGGTGCTTTCGCGGATAAATGGAACCGCCATCACACACTCATAGTTACCCAAACCGCCTACATGATACAGGCTGGCCTGCTTGCTTTGGCCACCCTGACTGAATACATAAACCCCGGGAGGCTGTGGCCGATCCTGTGTTTAAGCCTCTTAATGGGCTGCATTGAGGCTATCGACGCGCCCATCCGGCAG…
33520	c_000000008636	3116	3254	r			ATGAACTCGCTTTTGGAGGAAGAGCTGTTTGACCTGCCCGATCCCAAACTGGCCAGGGTGCGCATCACCGACGCCAGAGTCAGGGAAAAGCTGTTGCCGGTGCTTGAAAACGAAGATCTCTCCAGGTTCATCTTGTGA
33521	c_000000008636	3222	4467	r	AAA domain (Cdc48 subfamily)	PF07724	ATGCAGATATCACCTGAGCTGGTTCCTGCCAAAATAGTGGAGGAACTTGACAAATACATAATTGGGCAGTTGGATGCCAAACGGGCTGTAGCCATCGCTCTGCGCAACCGCTGGCGCAGACAGCAGACACCAGAGGCGCTGCAAAACGAGATCATGCCAAACAACATTATCCTCATCGGACCAACGGGCGTGGGCAAGACCGAGATTGCCCGAAGACTGGCTCGCCTTGCCAATGCGCCTTTCATCAAAGTGGAGGCGTCCAAATACACTGAGGTTGGCTATGTTGGCAGAGACGTGGAGTCGATGGTCAGAGAACTGATGAACAATTCTGTCAACCAGATACGCCAGCAGATGTTTCAGGATTGCGAGGAACGTGCCACAGCTCTGGCCATCAACAAG…
33522	c_000000008636	4466	4814	r	Proteasome subunit	PF00227	TTGAGAAAGTTTGAAGAGCGGCTGAAAGGAAACAAGGGTAATCTGCGCAAAGCAGCGGTTGAACTGGCCCGCGAGTGGAGGACAGACAAGGTGCTGAGGCGTCTGGATGCCATGCTGGTAGCCGGAGACAGTAGCGCCATACTGTTGATCAGCGGAGCTGGAGATGTATTGGAGCCTGACGATGGCATAATAGCCATAGGTTCCGGCGGCTCTTATGCCCTGGCTGCGGCCCGGGCGCTGGCGGCGAATGGAAAGCTGGCCAACCGTACTTTGATCGGAGAGGCTTTGCGTATAGCTGCAGACATCTGCATCTATACAAATAACAATATTATGATCGAGGAAGTCTGA
34124	c_000000008801	125	419	f			ATGTCCTTCGCGCCCACGGGGCAGCAGGATGTTCAGAGAGCGGCCAGGCAGGCGGGGGTATCCCGGAGCGGTCAGCGCGCCCCAGCCTGGTTCCTGGAGTTCTTGGTGAGGATCGAATCCGGAGAGATCGATGTCGAAGCTCCGGCTTTCCGCGGCAAGATTGCCCGCAAGCAGCAGAGCAAAAGCCACAAGGGACAGCAGCGCTCCGGTGAGGCGCTGACTGCGTTTCGGGGCAGAGAGAAGTCTGCCAAATCTGGTAAAAAGCATGGTTACCTCCACAAGGGGGTTAAATGA
34125	c_000000008801	873	2625	f	Immune inhibitor A peptidase M6	PF05547	GTGGAGGCCAGCCCGCTTGTCGTGGGCGAAGGAGATCCCCGCAGCCTGGGACTGGAGCCCGGCATCAACATCAGCGAGGGGCTTTACAAGCAGCAGCGCCGCGAGAGATTCTACAGACCGGTAGAGCGCGACGCCCCCACCACCGGCACCATCAACAACCTGGTGATCTACATCCGCTTTTCGGATGAGACGGAGTTTGGCCAGCAGAACTCCATCTATGATGGCTGGTTCAACACCAGCGCCAACTCCCAGAAAAACTACTTTCTGGAAGCCAGCTACAACCAGCTAACCGTGAACACACATTTCTATCCCGTCCCGTCGGGTGGCTACGTTGTCTCCTGGCAGGACAGCCAGCCCCGCGCCTACTACCAGCCATACAACGCCAGCACCAATCCCAGT…
35313	c_000000009143	216	1365	r	FAD dependent oxidoreductase	PF01266	ATGAACAGAATATATGATGCCATAGTAATCGGCGCTGGGTCGATAGGTGTTCCCGCTGCCCTGAACCTCGCCCTGAAAGGGTTAAAAGTGTTGGTTCTGGAAGCTGCCAGCGCTCCCGGCCAGTTCAACAACAAAAAGGCCATCGGAGGCGTACGCGCCACCCACAGCGATTTTGGCAAGATCAGCGTTTGCCAGCGTTCGATCGAGATAATGAGTTCCTGGAAAGAGACATGGGGTGACGATATTGGCTGGATGAGCAACGGCTACAGCTATCCCGCCTACACAGCCCAGGACGAAAAGACGCTCAAGAATCTCATGCAGGTGCAGCTCGGCTTCGGGCTCAATATCCTCTGGGTTTCCCCGGATGAATACGACGCCCTGGTGCCGGGTATCAACAAG…
35314	c_000000009143	1368	3438	r	Pyridine nucleotide-disulphide oxidoreductase	PF07992	TTGGATAAGCATCGCATCACTCAACATCCGATCCTTCCTGTAAACGAGCGCGAAGAAGTACTCTTCACATGGAACGGACAAGCCCTCGCAGCCAGAAAAGGGGAAATGATATCTTCCGCCCTGATCGCCAACGGGATCAGCATATTTGGCCACAATCACAAAGACGGCAGCGCCCAGGGTATTTTCTGCGCCAATGGACAGTGTGCCAAATGCACTGTCATAGCTGACGGCGTCGCGGTAAAATCCTGCATGACGGAAGTGCGCGGCGGGATGGAAGTACGCAGCGCTGACGGACTGCCGGAGCTCCCATTGGAGACTGAGACCAAGTCCAGGCCAGCAATCGAGCATCTGGACACCGATGTACTGATCATTGGAGGAGGCCCCTCAGGCTTGGCGGCT…
35315	c_000000009143	3712	4882	f	Cys/Met metabolism PLP-dependent enzyme	PF01053	ATGAGCAAAAGCAAGAGATTTGATACACTGCAAGTTCATGCGGGCCAGGCGCAAGACCAGTATAAATCTGTAACGCCGCCCATTTACCAAACCTCCACCTTCGCCTTTAGTGACGCGGATGATGGAGCAGCCTGTTTCGCCGGGGAAAATCCTGGCTATATCTACACCAGATTGGGAAATCCCACCATCAGGCATTTGGAAAATGCCATGGCCGAATTGGAGAAAGGTGCAGGCGGAATAGCCTGCGGAAGCGGCATGGGGGCTGTATCGACAGTCTATATGGGATTTCTGGATTCACAAAGCCATATCGTATCCACAGCCGCGGTATATGGCGCATCCAGGACTCTTTTGGAGAAACACATGTCCCGCTTTGGTGTGGAATCAACTTTTCTGGACACC…
35316	c_000000009143	4967	6872	r	MutL protein	PF13941	ATGCGCTGGCTGCCTGAAAATATCGCTCCCCAGGAAGTACGTAACTACATTGCCAACAAATGCCTTCACCCCACAGGCAATCCCAAAACCACAAATGAATACAGGATCGAACATGCCCTGGCTAGAGAAGCATTGAAAATGGCCTTGGAGCAACACCGTCAAATGCACTATAATAAAGCTCGGATCGGATTTTTGGACAAGCTAAAAATGGGAGATAAAGATAAATATGAACAGATCTTCGAGTACCAGCGGGAAGATGCCAAATTCTCTTTCCATGAGAGCGATATAGATGTGCTTATCGGTGCCGGGGGCGTCTTTGCCCACTCACAAAACACCCATCAGTGCGTAATGATCCTGATAGACGCCATCAGACTAAAGGGAATCACTGAAGTGTGGATC…
35317	c_000000009143	7029	7848	r	MutL protein	PF13941	ATGGAACAACCAAGTGAATTGATCTTGATCACAGATATCGGTAGCACTACGACCAAAGCCTTGCTGATAGACGGAAGGCCAGAAACACCTCAGCTGCTGGCCGTATGCAATGCTCCCACAACTGTGGAAGATCCCGTAAACGACGTGCGTTATGGAGTCAAAGCGGCTATAACGGAATTGGAAAGAATGGTTGCTGTAGAGCTTTTGCAGAAGAGTGAGGGGCCAGAGTTGCAATTTGCGGATAACGTTGCCTATTTCAGCACCAGCAGCGCTGGCGGAGGTCTGCAAATCCTGGTTATTGGGCTTACTTTATTCGATTCCGCAAGCAGCGGCAAAAGATCAGCCTATGGAGCCGGGGGAGTGATCCTGGATACAATTGCCATCGATGATAAACGACAG…
35318	c_000000009143	8021	8519	f	Staphylococcal nuclease homologue	PF00565	ATGAAAAATGATTATAAGAGATTACTGGCCAAGATCCTGGTGCTTGCTGTCAGCTTGTTTGTTGGCTCTTTGCTATACAGCAAAAGCATCAAGGGGGAGGTTGTTTCCATCCAGGACGGAGATACCATCACGGTGCTAAAAGCGAAAAAGCAATACAGGATTCGTTTGGATGGCATCGATTGTCCCGAAAAGAACCAGGCTTTTGGCAACGTGGCTCGCAAGTTTACCTCTGACCTCGTATTCAGAAAAACTGTAAAAGTAAAATACGAAAAGCGCGACAGGTATGGAAGATATCTGGGGACAGTAATTACTCCCGGGGGAAAGAACCTGAATCACGAATTGCTGAAAGCTGGCCTTGCCTGGCAGTATAAATATAATAAAAGCCCCGTTTTAAAGTCC…
35319	c_000000009143	8617	9601	f	Phosphoglycerate kinase	PF00162	ATGAGCACCGTACCGAGTTTCCAATTGGCTGATCTGCGCAACAAGATTGTCCTGATCCGTATGGACCACAACGTGGTTAAAAAAGGAAAGATCAAAGACACCATGCGTATTGACGCGACCATTCCCACCCTGTTGCATATTTATAAACAAGGTGGCCTGCCCATCATAATGACCCACGTAGGGCGGCCTTTAGACAAAAAGACTGGCATGATCAACATTACCGATGGTGAAGCGGTTAACCCGATTGTCAGTTATCTGGAGCAGAAACTTCAGCTTAAGGGGTTGGTTCCAAACTGCTCCGCCCAAGGGACTGAAGGTATCACAGATCTGTCGCCACTGGCTCCAGCGATTGACGCCTTGAAGTCCCGGCAGGTGGATTTTGTTTATCTGCCCAACACT…
35320	c_000000009143	9672	9897	f			ATGTATTCCCTGATCGATAAGAACAAAGCTGCTATGAAGCTCTTTGGCGGGGGAGACACAATCCAGGAATTCCGTGAAAACCTGCCCGGTATCTTTACCAAAGCTGCCAACGATCCCAACTATTATTTCTTTACCGGAGGCGGCGCGGTTCTGGATGCCATCGTGCAGGGATCGCCCTATGGAATGAAACCCGTTCAGGCCTTGCTGGAACAATCAAGCAAGTGA
35321	c_000000009143	9912	11337	f	Methylmalonyl-CoA mutase	PF01642	ATGGATTTGGATAAAGAACTGGACCTGCTGGACGAGTTTCCTCCTCCCAGTTATGAACAATGGCGGCGGCTGGTTGAAGAGAGCCTGAAAGGCGCCGACTTTGACAAGGCGATGTTTACAAACACCTATGAAGGTATCAGGCTAAAACCGATCTACCGCAAAGAGGACTTGGAATCGCTGTCCTGGCTGAACTCCTCGCCGGGCCAGGCGCCTTACGTCCGTGGCAGCGACCCGCAACGTTTCCTGGCCGATGCCTGGCTGGTCGCGCAAAGCTATGATGAACCAGATCTGAAAACCCTGAATAAACAACTGCTGGCAGATCTGAATAATGGCCTTACGGCAATCACCCTTCAGTTTAAAAATGATGACCACCCTCGGGGAGTGTCGCTTAAGACCCTT…
35322	c_000000009143	11275	11812	f			ATGTATGCCAATCCTCTGGAAGAGGTAAACTATCAGCAAACGGAAGCTGCCCACGTCAATAAAAATCCTGCTGTGGCCCTGGAAGCGGGGGCACTGCCCAAATTGCGTGTGACGACAGCTTTTGAAGACCTGCGGCAAAGAATCGCAAACACCCTTGCTAACAAAAAGGTGTTCCTGCTCAATATGGGCTCTCTGTCCGAATACAAAGCCAGGGCGGATTTTGCCACAGGTTTCTTCCAGGTGGGGGGATTGGAGGTGATTTCTCCCTCCGGTTTCACGCAAGCTCAGGATGCGGTTGAAGAAGCTTTGGCTTCGGGTGCGGCAGCGTTCTGTATCTGCTCCACGGATGACAACTATCCCACTCTGGTGCCAGAACTTTGCTCCAGACTGCAAGGCCGT…
35323	c_000000009143	11808	12597	f	Methylmalonyl-CoA mutase	PF01642	ATGAATCCAGATTTCACCAAGATAAATCCCGAGTTCAAATGCTCCGGCAAAAAGCAGGAGGTTTCTCGCAACGCTTGGAAAACCAACGAACAGATCGAGGTCAAGCCTCTTTACACCACTGCTGATCTGGAGGATCTGCAGCATCTGGATTACCTTTCCGGCATCCCGCCCTATCTGCGAGGACCCTATCCTTCGATGTATGTGCAAAGGCCCTGGACGATTCGCCAGTATGCGGGCTTTTCCACCGCGGAAGAGAGCAACGCTTTCTACCGCCGCAACCTTGCCATGGGGCAGAAGGGGCTTTCCATTGCCTTCGACCTTGCCACCCACAGGGGTTACGATTCTGATCACCCCCGGGTGATAGGTGATGTCGGCAAAGCTGGTGTGGCGGTGGACAGC…
35440	c_000000009177	2	125	f			AAGCTGAAAAAGCAGCTCTACTCAAAGCGCAGCCTGGAAGCGCTGAGAGGCTTTTGGAAGAGAGCGATGGCTAAAACCCGGTTCGCCTGCCGCCAGCGGAAGAAAGGCCAAAAACAGAATTGA
35441	c_000000009177	149	1478	f	GTP-binding GTPase N-terminal	PF13167	ATGCAATTTGAAGAGAAAGACTATCTGGTGGAGGAATACGATCTCGAGCCGGATTCCTGGGAAGATTTAGAGCGGGAAGACAAGACCGCCTTTCTGGCAGCGATTGTCCGCCAGGACGAGACGGAGAAGGACAGCCAGGCCAGCCTGGATGAATTGGAAAGGCTTGCCAATACCGCCGGCATCGAGGTGCTGGGACGCTATACGCAGAGGCGCAACAACCCCGAGCGTGCCAGCTACTTCGGCAAAGGGTTTCTGGAGGAAATCAGCCACCGCATGCACCAGGCCCAGGCGGATTTGCTGATCGTGAACGAGGAACTCAACCCCATCCAGCAGCGCAACATCGAGCAAAACTTCAGCATCCGCGTGATCGACCGCACCGAGGTCATCCTTTCCATCTTC…
35442	c_000000009177	1534	2164	f	Coenzyme A transferase	PF01144	ATGTTTAAGCTCATCACCGCTGCGGAAGCCGCAGCCCTGATCAAGCCTAACAACCGCTTGGCGATAGGCGGGTTTTTAGCTGTGGGTGCGCCCGAGAGCATCATTGACGCGATCGTGGCCGCCGGCATCAAAGACCTGCATATGATCGTGATCGCCTCTGACTGGGAAGACCGCGGCGTCGGCAAACTTGTGGCTAACCGCTGCATCAGCAGCGCGCAGGTTTCCCACTTGGGCACCAACAAGGAAATTCAAAATCAGATGAACTCAGGCGAGATTAAGATCGAACTCGTCCCCCAAGGCACCCTCATGGAAAGAGTGAGGGCCTTTGGCACTGGTTTGGGCGGAGTTCTGACCCCCACAGGCCTGGGAACCGTAGTGGAAGAAGGAAAGCAGATCATC…
35443	c_000000009177	2188	2842	f	Coenzyme A transferase	PF01144	TTGAGATGGCTATCGATAAAACGTGCGCAAATCGGAGCCCGCATCGCCAAGGAACTGAAACACGGCGATTATGTGAACCTGGGCATCGGCCTCCCCACGGAAGCTGCCAACCACATCCCTGAAGGAGTGAGGGTGATCTTCCAGTCTGAAAACGGAGTTATGGGCGTGGGCCCGGCTCCGGAAGAGGGAGCAGAAGATCATGAAATGATCAACGCCGGCGGCGGTTTCATCACCACCCTGCCGGGCGCTTCGTTCTTCGATTCCGCCACCAGTTTCGGCATCATCCGCGGCGGACACATCGACGTCACAGTGCTTGGCGCGCTGCAAGTGGATCAGGAAGGCAACCTTGCCAACTGGATGATCCCCGGCAAGCTGACCCCCGGCATGGGCGGAGCCATG…
35444	c_000000009177	3262	3460	r			ATGCTTTGCTGTCAAGACATATTTGCCGTCCGGCTGGCTCTGGCGGGCACCTCATTCCACCTTTCCACCTTTCCACTTATCATAGCACCTATATATATGGGGGGGAAGGTGGGCCTCATTTGTATAACCCTCTCCGTAGTGGGTCTTCCTGGGGTCAACCTTATAATTTATAAGGATGACCTAAGGATGATGGGATAA
35445	c_000000009177	3499	4633	f	Glycosyl transferases group 1	PF00534	ATGAAAATCTGCATCGTATCCAACAGTCACCACACCACGGATGTGCGCCTCTATTATAAAATGGGGCTAAGCCTGAAAAAGCTGGGCAAGGTGTATCTGATCTGCACAAGCGGGGTGCGCAATTCAACCATTAACCCATATCAGTTGGTGGTGGATACGGAATCCCAATGGAACGCCCTCCGGCTGCTTTACGAGGAGGCGAAAAGGATCAGGCCGGACATCGTGATCTGCGTGGAGCCGCTCACGGTGTTTGTGGGCCTCGCGCTCAGGCGCAAGTTGGGCACCCGGGTGGTCTTTGACGTGCATGAGTTCTTTCCGGATGCCTTCGCGGAACGCTTTCACCCGCCTTTCAGTTGGCTGGCGAAGTATCTGTATCTGGGCCTTGAACGCTGGCTGCAA…
35446	c_000000009177	4634	5087	f			ATGCGCCTGCTCTACATCAGCTATTTCTATCCCCCCCTTGGCGGCCCCGCCTCGCTGCGTAACGTCAAAACGGTCAAATACCTGGCTGAATCCGGCATCGCCTGCGATGTGATCACGGTGGGCGATCTGGAGTATCTCTACCGGGATGCTTCGCTGCTGGAGGAATGCAGGGCGGACAGGGTGATCCGCACCGCCTCGCTGGATCCCATGACGCTGCTGCGTAAAGCCGGGAAATCCAGGCAGGGGAAAGTCTCGCCGCTCTATCTGAACACCCCGGAAAAGCTGAAGCTTTGGGCGCGCAGGCTCTACCCCCATCGACAACAAGATCGGCTGGCTGCCCTTCCTGCTTGCCGCGGGGAGGAAAGCGCTCAAAGAAAGGGATTACGACCTCATCTATAT…
35447	c_000000009177	5220	5901	f			GTGACCGCCACGCGGGGCATCGGGGAAGACATCTGCGCCGCTTTCGGTGTGGACTTGGCAGACAAGACCTTCACCTGCTACAACGGCTGGGATGAAGAGGATTTTACCGGTCTGCCGCGGGCGGAAAAGGAGCCTGGCTTTGAACTGGCTTATTTCGGCGCCATCTACGCGCGACGCAGCCTGAAACACTTCTACCGGGCAGTGAAACGCCTGCGGGAAGAGCGGCAACTCCCTCCCGGAACGCGCATCCGGCTCTATGGCAACTATTTCAGGGAAACCCTGGAGGAGATCGGGGCCAGCGGGATAGCTGACCTGGTCGGGATCATTCCCCAAAAGGAACACCGGGACGCCCTGGCCGCCATGCTCAACGCGGATGTATTGTTGCTCAACCTCAACAGC…
35448	c_000000009177	6081	6309	r	Chromate transporter	PF02417	ATGACTCCCGGCCCGATCGCGATCAACGCCGCCACCTTCATCGGCTACCAGCAGGCGGGCATCTGGGGTTCGCTTGTTTGCACCTTTGGAGTGATCCTGCCCTCGTTGCTCTTGATGCTGGTCATCACCCTCACTTACCTGAAGCTGCGCAAGCTCCCCTGGTTCAAGAATATCTTTCAAAAGCTGCGCTGGGTCACCCTGGGACTTATCGGCGCGCCGTCATCCTGA
35449	c_000000009177	6358	6613	f			ATGCCGGGTGACAACCTCCTGCTGGATCATCGCCAGGATGGCGTAACCTCCCCCAAAGCTGAAGAGGCCGATCTTGACAAAGGTGGCAAACATGGTCAGCATGCTCATGACAGCCTCCGTTTAAGCCACAGGCTTTGTCCCACGCAAAACACGATGGTGGCAAGGATTAGCCAGATGGGACTTACCCCAAGCAGCCCCACCAAAACCATTGCCGCGAGGGGAACCCAGAAGTTGCTCAGGTTCAGTTTGGCGTAG
35450	c_000000009177	6599	6776	r	Chromate transporter	PF02417	CTGGTCGCCTTGCTGGGCACCATGCTGCCCTCCATCATCACCATCATCCTGGTGGCGGAACTCTTTACCCACTATGCCGATCTGCCATTGGTGCGCAAGGCCTTCCACGGGCTAAAACCCGCGCTGGTGGCGCTGATCGTTGTGCCCCTGATCGAGATAACCACTACGCCAAACTGA
35477	c_000000009185	2	500	r	Phosphate acetyl/butaryl transferase	PF01515	ATGTTTAAGAATTTAGACGAAATGAAAGCCCACGTCCATGGGAAAGTAAAGGCCACTGTAGTGATTGCGGGAGCCCATACCGAATCCGTTCTGGATGCCGCGATCCTGGCCAAACAAGAGGGCCTGGCCGACAGCCTGTTGGTTGGCAACAAACAAAAAATCCTTGCTCTGCTGGAAAAAATGTCTCCAGAACAAAAACAGAGCTTTGAGATAGCAGATACAGGCGATGATCTGGTAAAAGCAGCCCAACTTAGCGTCCAACTGGTAAACGAGGGCAAGGCGGATATTATCCTCAAGGGTAAATCTGATTCTGGCATGGTGATGCGTGCGGCCTTGGACAAAGAAAAGGGGCTGCGCCTGGGCGACGTCATATCCGATGTTTTGGCTTATGAGCATCCC…
35478	c_000000009185	535	1312	r	Sigma-70 region 2	PF04542	TTGGCACTCCGGGCCAGGGATGGGGATGCGGAGGCGATGCACAAGCTGATCCAGGCAAATCTGAAATTTGTGGTCAAGATAGCATCCCGCTATCAGAATAGAGGTTTGTCCCTCTCAGAATTGATCAGCGAAGGTAATATCGGCCTGATCAAGGCTGTCGAGAAATTCGATCCGGATAAAGGTATCAAGCTGATTTCTTACGCCATCTGGTGGATCAAACAGCGCATCATGCTGGCAGTGTCCGAAAAGAGTTCCCTGATCCGCGTTCCAATGGGCAAAGCAAGTTCCGTCCATCGTATCAAAGCAGCTTCAGACCGCATCTATTCGGAAACCGGGGAAGCCGCCACCAAAGAAGAGCTGAGCGAGAAAATGCAGCTTCCCAAGAGGTCGATCGAGCAG…
35479	c_000000009185	1429	1810	r	Peptidase family M23	PF01551	TTGATCAGGGATGATCTGGCAATCCCCACCATCGGCAGGGTCACCTCTGAATTTGGCTTGCGCCATGGCAGGCCTCACAAGGGTATCGACATCTTTGCCAAGACCGGCACTCCTATATATGCAGTATTGGACGGCGTGGTGGTCTTTTCCGGCGTTCAGGGGAATTATGGTAATGTAATAGTGCTTGAACACCCGGATTTCGTGATGACGGTTTACGCTCACAATTCCATCAACCTGGTGAAAGTGGACGAAAAAGTGAGCAAAGGGCAGTTGATTGGCTATGTGGGCTCCACAGGCAACGCGTCCGGGCCACATTTGCATTTTGAATATCGCATCAAGGGTAAAGCGATCAACCCCCGCAAAGTTTTAAAGCTGAATTGA
35480	c_000000009185	1806	2493	r	LysM domain	PF01476	GTGACAATTGAACAGATCAAAGAACTTAATCAACTTCCAGACAACAGATTATCTATCAACCAGAGACTTAAGATCAAATTGATAGAAGAACCGGGAAGCAGTCAGCCAACACAGGTGACAGCACCCCCATCCGTAGCAGTGCCAGTGCCCGCAACAGGTAATGAGAACTTAGCGTCTGCCGCCAGACCAGCGCAGACAACCACACCCCCCAAAGACCTCCCGGAAAGCTACTACTACACGGTGCAGCCCAAAGACAACTTATACCGCATATCCGTAAATCACGGCCTGGCTTTGAAGGATTTGCTGGCCTGGAACAATATGGATGATGTCACATACAGCATCCATCCAGGCGACAGGCTGTTGATCAAGGATCCCGGTGTTGAAGAGGATGACGTTCCA…
35481	c_000000009185	2650	2920	r	Acylphosphatase	PF00708	ATGCCTTCATGGGAAATCGATGTGCGTGGAAGAGTGCAAGGCGTTGGTTTTCGCCACTTTGCATGCCGATGCGCACGACTCTGTAGCATCCGGGGATACGTGAGAAACAAAGCAGACGGCTCGGTGTATATCCTCGCCCAAGGGCGCGGGGAGGATTTTGAGCTGTTCTGCACATATCTGCGTGCCGGCAGGGGATTTATCCTGGTGCGGGATATGGAAGCACGCGAATTGGACAATGCGATTGAATATAAAGAATTTGAAATACATTGA
35499	c_000000009191	0	1614	r	ABC-type transport auxiliary lipoprotein component	PF03886	ATGAAGCGCAACCAGCTAATAACCCGCCTGAATTGCACCCTGATACTGCTCTTTAGCGCCTTATTGCTTCTGGGTGGATGTCTGCACAAAGTGGACAGAACGGTCACCAATTACTATGTTTTGGACTATCTTCCCGCCACAGAAAACGACCAGCTCAGACTGGCCAAACCCTTCCCAAAGAACATCGAAGTCCTTGACGCCACCATCGACCGCACCTATTCACGCAATCAACTGGTGGTGAAGGACAGCTTTACAAGGATCAGATATCTGCCTTTCGACATCTGGGCAAACAGGCTCAGCGACGCCATACCCAATCTGGTGGCCCAACGCTTGCGCGCCTACAACATTTTCCGCAGGGTGGACCGCGACGCCGCTGAGGCTGCTCCTGATTACTACCTG…
35500	c_000000009191	1610	2540	r	MlaD protein	PF02470	ATGGTTTCCAAGGCGGCAAAGATCAGGTTGGGCCTGTTTCTTAGCGTAGGCATATCGATCCTTGTACTGTTTTTCATTGTGGTAGCCGGAAGGCATCTGATGCAACACCAGGACATCTACTTCATCGAGTTTGAGAACTACTCTGTGAGTGGACTCAATGTAGGCGGGACAGTCAATTACAACGGAATACCGATTGGCAGGGTCGAGGAAATCAAGATCAAGCCTAACGATGTCACCAAAGTGGTTCTCAAAGTTGGACTGGATAAAGGCACCCCCATCAAGTCAGACAGCGAAGCCATCCTCATATGGGTTGGAATCACCGGAGTAAAAGCTGTGGAGATCAGAGGAGGCACCAACCAGGCAGCCGATCTTAAGCCAAAAAGCTTCATTCGCAGGGGA…
35501	c_000000009191	2551	3928	r	UTP--glucose-1-phosphate uridylyltransferase	PF01704	ATGAGCAGCATGCTTAGCCACTTCAACAAGCTGATGAAGGCCCACTCCATCCCTGAAAGCGTGATCCGCACTTTTGGTTCTTACTATAAGCTGCTTGAAAGCGGCGCCAGCGGCCAGATACCGGGTTCAGAAATCAAAGCCCCATCGCCGGAGAACCTGATCGACTACAACGAGGTCAACTCATACAGGAATCAAGGTATCCTGAAAAACATAGTGGTGATCAAGCTTAATGGAGGATTGGGCACCAGTATGGGCCTCAGCGCGGCCAAAAGCCTGCTTCCCGTGAAAGGCAACATGAACTTTCTGGATATCATCACGAGGCAGGTGCTTTCCCTGCGGGCAGGTTCCGGCTATGAAGTGCTGTTGATGTTTATGAACAGCTACAACACGGAAGAGGAC…
35502	c_000000009191	3924	5517	r	Urocanase Rossmann-like domain	PF01175	ATGACGGAAGAACAGACTCTGGTTGTCCAGTCCGGCCATCCCCTGGGTCTTTTCCCTTCACGTCCCGAGGCTCCGCGCGTGATTTCCACCAACGGTCTGGTGATCGGGAACTGGGACAATCCGGAGGAGTTCAAGCGACTGACCGCATTGGGAGTTGCCAATTACGGGCAGATGACTGCCGGGGGCTGGATGTATATCGGCCCTCAGGGAATAGTTCACGGAACCTACATCACCTTGCTCAATGCGGGCAGGAAATACCTTGGCATCCCTGCTGACAAAGACCTAAGCGGAATCCTGTATATCTCTTCCGGATTGGGCGGCATGAGTGGAGCCCAGTCTAAAGCGGTAGAGATAGCCGGAGGGATAGGCGTCATCGCCGAGGTTGACTACAGCCGCATC…
35503	c_000000009191	6539	7139	f	Bacterial regulatory proteins, tetR family	PF00440	ATGAACAAAGCCGCGAACATGAAGGCCAGAATCCTGGAAACGGCTATAAGCCTATTTTCACACTATAGCTTTGGAAAAACATCCGTGGACGATATCGCCCGGGAAGCACGTATCTCCAAAGGAACTGTCTATTACTATTTCCGCAACAAGGAAGAACTGTTTCTGAGCGCCGTAAATAGAAAAGCCGAAGAGTTTTTCAACATCCTCGATGAACGCCTGCAATCCTGCTCAGGTTTCGAGGAAAAACTCACGATGTATTTCAGGTTTCCCATGAGCTTCATATTTACAAATATGCCCATTCTGTTGGAAGGCATGGCTCATATCCCGATGAGCTACCAAGAACGCCTGCATGAAGATAAACGCATTTACCAGAGCAAGATGAGTTCGGTTTTGCTCTCG…
35504	c_000000009191	7142	8513	f	Outer membrane efflux protein	PF02321	ATGAAACAAATTATCACCTGCTTCCTCGCAACTCTCGTATTGGCGCAAATCGGCGCCATCAGCCTGGAGGAAAGCATCGGCCTTGCCCGCCAAAACAACCGCAAGCTGCTGATGGCCAAGGAAGATGTCCTTATGGCGGATCAAACCTACAACGAAGTGCGAGGTACCCTGTTGCCCCAGTTAAACCTGGTGGGAGGCTACACACTTTCCAAGACCTATCTGCCAGATTCTGCAAAAATCCCCGCGATGAACTTTGCCGCGGGGCTCGATACCCTCGCCACGAGAAACGATTACTACCTGGCTGGAGTGGTTAGCGGTATCTACAATGGCATGTTGCCGAGTTCGCCAATCGATGAGGGTTCAATCGCTGCCCAGCTTCAATTTTCCCAAGTCCTGTTC…
35505	c_000000009191	8525	9548	f	Barrel-sandwich domain of CusB or HlyD membrane-fusion	PF16576	ATGAAAAAGACATACATTATCCTGATCTGCGTAGTTCTGCTCTTCTCAGCCTGCGGGAAAAAGAGCGAAGTTGGCAAGAACATGGAGCAGATCCAGCGCGAACAGGGCATCCCGGTGCGAGTCAGGACAGTTGAAGCCGGGACATTCACCCAGGAACTGAATTACAGCGCAACCCTGGGCGGAAGGGAAGAATCCACCGCCCAAGCCATGGTAAGCGACATCGTGACCTCGATCAAAGCCAAGGTGGGAGACCGCGTTACGGCTGGCCAGATCATCGTCACTTTTCCCCAAAACACACCCGCGGCTCAGTATGTTCAGGCTTCCGCGGCTTTCAACGCCCAAAAACAGGCCTATGAGCGCATGCAACGCCTTTTTAACCAGGGCGCGATAGCGCGTCAG…
35506	c_000000009191	9558	10122	f	AcrB/AcrD/AcrF family	PF00873	ATGTTCCTTTCCAATATATCAGTCGAACGCCCGGTACTCGTCACCATGGCTTTGCTGGTCTTTGTGGTCTTTGGCATCCTGGCTTACTTTGAGATGCCTCTGAACCAGATGCCGGATGTGAAGATGCCCTTTCTGGTCATCCAAACGGTGTATCCCGGTGCCGGACCCAGCGAAGTTGAAACCCAAATCACCAAGAAGATCGAGGATGCCATCGCCACAGTAAGCCAGGTGGACTACACCCAGTCCTATTCGATGGAGAACGCCAGCATCATCATGATGGCCTTCAAGATGGGCAAAGACATCGATATTGCCAATCAAGAGGTCAAGGATCAGGTTGACGCTATAATCCGCGAACTCCCAAGCGATGTGGAACGGCCTGTTATCCAAAAAATAAACATC…
35507	c_000000009191	10165	10966	f	AcrB/AcrD/AcrF family	PF00873	ATGCAAATCCTCGCCGCCCAGAACATGGATTTGCCTGCAGGGAGCATCAAGAGCGGAACACAGGAGTACTCCGTGCGTTTTAAGGGGCAATTTGACAGCGTTGACAAGATCGGGGACGCGGACATCCCCACCATGACCGGCATTAAGAAGCTGCGCGACATCGCCACCATCACCGACGGCGCCGAGGACGTCACCTCCCGGGCTATCTATTACAACATACCCGCGCAACGCCTTGAGGAAAACATTGTCCGCATCTCGATAACCAGCGCTTCCGACGGAAACATGGTGGATATTTCCAAGCAACTGAACGAAGAACTGCCCGAAATACAAAAAGAACTGCCCGAGGGTACCAAGCTGGAACTGGTCCGCGACGATTCGGACTTCATCCGAGCTACTGTC…
35508	c_000000009191	11161	12658	f	AcrB/AcrD/AcrF family	PF00873	ATGATCGGCGCCACCGTGCTGCTATTGATTGTCAGCTTCGCTCTGGTTCCCATAATTGGCCTGGAACTGTTGCCCGTCATGGATATGGGCAACATCACGGTCAACGTCGAGCTGCCCCAGGGCTACAATCTGGATCAGACCGCGAAGGTTTACGAGGACATCCACCAACGCATCGGCAAACACAAAGAGATCAAGCACATCATAACCAACCTTGGTTCCTCAGGATTCATCGACACCGGTTCAAACATCGCTGCCTCGGACATCAAGCTGGTGGACGCCGACGATCGCAAACTCAGCTCCCGCGAGATGGCTGACCTGCTAACCCGTGAACTGGCGGATATCCCCAACGCCCGCATCAAGGTATCAGCCTCCACCTTCATGATGGGCGGCAGTTCCCCA…
35509	c_000000009191	12654	13170	f	Domain of unknown function (DUF3332)	PF11810	ATGAAAAAGTTCAAAACTACTGTCCTGTTATTAGTACTCGCAGCCTTTCTCTCTGTGAGCCTGTTCAGTTGCTACGGCAACTTCACCCTTACCCGTAAACTGTATGAATGGAATGGTTCGCTGGGTGACAAATACATCAACAACATAGTTTTCTGGATACTGCTCTTTATTCCGGCCTATGAATTTACCGTCGTAGCCGATTTCTTTGTGTTAAATACCATAGAATTCTGGACAGATTCAAATCCGTTGGGTATGAGTGAGGGTCAGGAAGTAATCAAATACGCGCAGACAGATGACGCGAGATTCAAGATCACCATCACCAAAAACAACATCGAGATCGACGAGCTGACCGGCAAGAATGCGGGTCAAAGCGTATTGCTTTCCTTTGATGAGGAATCC…
35510	c_000000009191	13256	13496	f	NifU-like domain	PF01106	ATGACGACTATGCTTGATAAACAAAAGATTGAAACGATATTGGACAAGATACGCCCCTCCATCCAGTCTGACGGTGGAGATGTGGAACTGGTCAACGTTCGGGAAGATAACGTTGTTGAAGTGCGCCTCAAAGGCGCGTGCAACGGATGTCCTATGGCAACTCTGACTCTTAAGGCAGGTATTGAGCGGATCATAAAAGAAGAGATTCCCGAAGTTGTCGAGGTCATCTCGGTCAAGTAA
35511	c_000000009191	13634	17681	r	Subtilase family	PF00082	ATGAAAAAGATAGCTTGCTTGGGCATTTTTCTTCTGCTAATGGGACTGTTGCTTATGGTTTGGCCGCAAACAGGCTTGCAGGCCAGCGTCAGGAGGATAGCATCCCCCGCAACTGGTGGCCAGGAATCCCTTGACGGCCAACCCGCTTTCGCCACCGACCGCATCAAAATCAAATTGACCCCTTCAGCCAAAGGCAGGGCCGACCTGCCCCAGGACCTCAACACCGAAAAAAAGCAAATTCGGCATTCCAGCCTGGACAGGACCATGCAGCGCAACGGAGCATACAAGTTCAAGCGCGCCCATCGCCGGGTGGATGACCTGGACTGGGAACAGACCACGGGTTTCGACCGCTGGTTCATCATCATGCTGGACGGCAGCACGGATGTTCATGCGGCTCTG…
35707	c_000000009252	562	3919	f	Helicase conserved C-terminal domain	PF00271	TTGAGCAATTTCATCACCAATAAAGGCAGCGCGCAGCTAAAAACCAGGCTTGCCACACTGATCAAGGCGAGTCAGGAGTTGAAGTTTCTGGTGGGTTTCTTTTATTTCTCCGGCATCAGCGAACTGATTGAGAGTCTGAAGGCAAACCCGGACTTGAATCTTAAGATCTTGGTCGGGCTTAATGTGGACGCGCAAAACTACGGTTTGGTGGAATACGCCGAAAAGGCGGGAAAGAAAAGAGTGGAGCGCATTGAAGACTATCACGAGTCTGTACTGAAAGCCCTCAACAACGATGTCTTTGACAATGAGGTGTTTTACCAGCAAGCCAGCTATATCATCGAACAAATAATCAGCGACAGAATCATCATCCGCAAAACAGCCAGCCCCAACCATGCCAAG…
35708	c_000000009252	3923	4244	f			ATGAGTAACATTGTCTTAACGCATAACTTCTCAATCGATAACTGGATAGACTATTTCGATACCCACTCGGATTACTTCGATCTCATTAACTCACAGGCAAGACAATACAAAGATGATGTTTTCAACTCAGTTATCAAATTGGGTGTCTTAGACTTACCAGAGGGTAATCTCGTCTCAGTCTTTCTCGTTAGATCAAGCCAGCAACTCAATGAAAGGTCTTACAGAAAGAAACAGTTTAACAAGTCGGTCGATATTCTCAAAGAAGAAAATACTCAAGCAGGCTTGTTTGTTTTTTTGATGCTGATTACAGCTTTCGCCTAA
35709	c_000000009252	4365	6696	f	Eco57I restriction-modification methylase	PF07669	ATGGATAGTCTTCAATCGATAAAAGAAGCATTTTCGATAGAGCCTGTTACCAATCAGTTCTTTATTGAAGTGTCATTAAAATACCAAGAACTTGTCGGTGGTGAAAGAAAAATCGGCTCCAGGATATACAAGTATCCTGGTATTCTGAAGTTACCAGAATCAGACTCGGAAACCAAAAAAGAATTTGCTGTGAGATTACTGGGGAGGATCATTTTTTGTTGGTTTTTGAAACTGAAAAGATCATCGAACAAGGTGCCGCTTATCCCAGGTTCTCTTTTGTCATCTAAAGCAATAGACAACTGTATTGATCAAAACTACTTCCACAAGATTATCGAACCCTTGTTCTTTGAAGTGCTCAATAAACATCGGGATGAACGTAGTTCTATATATAGAGGCGCT…
35710	c_000000009252	6665	7397	f			ATGCTTGCTGACATGGATGAATTGGAAATAAGAGAGCTGTTCAGTAGTTTGAAAGAAAAATATGGCAGGGATATTTTTGGCAGCGGTTATCTGTATCAGATTATAGCAGAAAGTGAGATTGCCAATCCGGAAAAGATGAGTCCGGCAGAAATAAGCAATGGTATAAAGCTTAATAAACCTCACTTTGTCCCCTATGATAAAGGTGATAAAGACGGCAACCGCTGGTTCTTGCTTACCCCATACTGTCTTGATTGGTCGGAAAAAAGCGTACATTATTATCAAACGAGTGCTAATTGTAGGTGGCAAGGTTATAACTTCTTTTTCCGAGAAGGTTTTTGCTGGAGTGGTATTAACACGATTTACCTCAAATGCAGGCTCAAGGGTAGAAGCGTTCACGAT…
35711	c_000000009252	7568	8159	f			ATGAAAACAACTAAAGAAATTAAGTGTATCACACTTAAAAGAAAAAATGAATTACTCAAGACCATGGAAAATCACTTTCAGATATATCTGAGAGCAAGGTCGCTTACTCCATATATTTCTGATCCTGTATCAAGTAAAACAAATCCGGAGAGATTGTTCCGCGTTACAACCTCTCCTTTATACCAGTTTTATGGCTATAACTGTCATTTTATCTTTAAAGCTGATCAGTTTAATACCAAAGCGAAGTTACAGCAGTATCAGGACATCGGGTATTGGATTAACCAGAGTTTCATTATTGAGTTAAAGTGCATTATTGATACATTCATTGACGACTGGGATAACTGTCCATTGAAAGATGATAAGTATTTTGAACTTCTAAAGAAGTGTCGCCATCTCTTT…
35862	c_000000009291	0	984	r			ATGCTGCAAAGCGGGGAGCGTGTCCAGATCCACCATCTTAACCAAAGCGCCAGGGCTCTGGTGGCAGCCCGCCTCTGGGAAGATACCCAAAAGAACGTTCTGATCGTCTCTCAGGATGACATCATCGCCGAGGATATCTGGGACGACCTGGTGGCTCTGCTGGGTGCCGGCAACGCCCACTACCTGCCTGATTACGAGATCCTTCCCTACGAGGAACGCTCGCCCCACTATTCCATCCGCGCCACCCGCATGATCTGCGTCAATCACATCCTGAGCGGCAAACCAGCGGTTTACAGCCTCTCCATACGCGCTCTGATGCGCTGGTTGCCTCCCCTCAGCTCCATCGCCTCCCACGTGAAAGTCCTCACGCCCGGCCTGGAGTATCCGCCCCAACAATTG…
35863	c_000000009291	1056	1383	r			ATGCCAAATGCCGCCGTATCTACGACTCATTCAGTTTTCACCCGACCCAGCCTCTTTCTGCAGGAACTGGAACAAGACCTCTTCGCCGGAAACAAAGACCCGGCAGACCTCGCGCGTGGCTCCCGTCCCCGTCCCAGGAAACGCGCCACCGTCACCGAGAAGGACAAGCAGTTCCGCATCGGCCAGCAGGTCTGGCACTCTGAATACGGGCGCGGGCTGGTGCTCAGTGTGGACGGAGTGGGGCCGGATGCCCGCCTCACCATATCTTTCGACAGGGGCAAGCTCACCAAGATCATCGGCACCTTTGTGAGCACCGAGCCGCTTTAG
35864	c_000000009291	1697	3041	r	UvrD/REP helicase N-terminal domain	PF00580	CTGGAGGCGCTGCTCCGTTTTCCTGTCCGCTCCCTTTGGGTGGGCACCTTCCACCGTGTCTGTTCACGCATCCTGCGCTATGAAGCTGCGCATCTGCCATTTGGAGCGAACTTTTCCATCTATGACGAGGATGCCCAGAAGTCGCTGCTCAAGAAGATCTATAAAGAAGAAGGATTCGACCGCCAGAAGTACCCACTGCCCCGGGTGCTGTACCGCATCGGGCGTTATAAAAGCAACCTGCTGCTGCCCGAGGACCTCGCCAAAGACAGCCAGGATGCAGGCTCCGGCAGAGGCTACCACGATGAATTTGAAAGCAAGATACTGCGCATCTACACCCTATACCAGCAAAGCCTGCTGCTCAACCAAGCCCTGGATTTCGACGATATCCTGCTCTATACC…
36329	c_000000009417	0	690	r	Oxaloacetate decarboxylase, gamma chain	PF04277	ATGGTGCGAAATATAATTTTGGCTCTGCTGTTGCTGATCGGGACCTGTCTTTTGACAGCCCAGGCAGAAGAAGCGGAGGAAATGGAACTGCTTTCCCCCGAAGAGCTGACCCTGCGCGTGCAGGCGCTTTCGGACAGCCTGCTGCAACTGAGGGAAAGCGAAATCCTCACCGACTATGGCTTCAAGGACAGGGATGCCTTGTCCACGGTGGCGGAAAAGCTGAAGATCGAAAACATCCCCAAATGGAAAAGGTATCTGGGCATCGAGCCGGAAAACCCGGTGCTGGATCGCATGAGCCTGCGCAAACTGGGCATCACCAGCTACAAGGCCTTGCTGGCACAGCAATACAGCATCCACGGCTTTACCGAACTGAGCACCCTCAGCGAATTGGCAGCCATC…
36330	c_000000009417	700	1075	r	Carboxyl transferase domain	PF01039	GTGCCCAAGATCACCGTCATCCTGCGTAAAGCCTATGGCGGAGCCTATTGCGTCATGAACAGCCGCCACATGCGGGCTGACCTGGTCTATGCCTGGCCGAGCGCCGAGATCGCCGTGATGGGCGCCAAGAGCGCAGTGGAGGTGATCTTCCGCAAAGAGGCGCAGAACTCCTCCGATCCCAAGCAGACCCTGCTCGAACGTGAGGCGGAGTATGCCGAAAAGTTCGCCAATCCCTACGCCGCTGCCGAACGCGGCTACATCGACGACATCATCGAACCCTCCCGCACCCGCTTCAGGCTGATCCGCGCCCTGGAGATGCTGGCCAACAAAAAAGACAGCATCCCGCCCCGCAAGCACGGGAACATCCCCCTTTAG
36331	c_000000009417	1017	2259	r	Carboxyl transferase domain	PF01039	ATGCAGATGGCAGCAAGCAAAGCGATCATCAGCCTTCGTCAGAAGCGCGATCAGGCGGTTCTGGGCGGAGGCGAAAAACGCATCCAGGAACAGCACGAAAAAGGCAAGCTCACAGCCCGGGAAAGGATCGAGCTGTTGGTTGACCCCGGAAGCTTCGAGGAGTTTGACCTCTTTGTCACCCACAGATGCACCAACTTTGGCATGGAAGAACAGCTCATCCCCGGCGACGGCGTGGTAACGGGCAGCGCCACCATCAACCAGCGCCTGGTCTATATCTTCGCCCAGGATTTCACCGTCTTTGGTGGTTCTCTTTCCAAAACCTACGCGGAAAAGATTTGCAAGATCATGGACATGGCGCTCAAAAACGGCTGTCCTGTGATCGGTTTGAACGACAGCGGC…
36332	c_000000009417	2714	4208	f	Peptidase family M1 domain	PF01433	GTGGTGAACCTGCAGATCAACGACCAAACCCGCTACATCCAGGGCAGCGTGACCGCCTTCGTTGACGCCCTGCAGAACCTTGACGGCATCGACTATGAACTGGAAGGCGATTCGCTGCAGGTGGACGGCGTGCTGGTGAATGGCCAGCCCGCGGCCTTCACCCACCAAAATGGCGTTATCCACATCCCGCTCTCGGTGTCGCAGGGAACCTTCAGCACCACAGTCCAATACTCCGGGGTGCCCAACCGCAGCCCCGCGCCCTATAACATCGGCATGATCTTTACCCAAAACTGCATCTACACCCTCTCCAACCCGGATGCCGGACGCTACTGGTGGCCCAGCTACGACCATCCCTGGAAAAAGGCTTTGGTGGACTGGAACATCACCGTGCGGGAAGAC…
36355	c_000000009424	1	1306	f	ABC transporter transmembrane region	PF00664	ATCATCCTGGGCCTGGCCCTGGCGGTGATGGTCCTGCGCTTTTTCTGGCGGGTGCTGATCATCGGCAATTCCCACATGATCGAGAAACACTTGCGGCAGGACTTTTTACAACCATCTGCTGAGGCTGTCGCAAAACTTTTTTTCAACCGTAGCAAGACAGGCGACCTGATGGCCTATGCCACCAACGACCTGAACGCGGTGCGCATGCTGCTGGGGATGGGCCTTATCGCGTCGATGGACATCGTTTTGATGACGGTCGCCTCCTTTAGCTTCATGGGCGCGATAAACTGGCGTCTCACGGCCCTGGCGGTGATTCCGATGCCATTTCTGACCATCACGATAAGGTACTTCGGCAGAAAGATGCACAAAAGCTTTTTCCGCGTGCAGGAGAGCTTTGCC…
36356	c_000000009424	1263	1572	f			GTGGCAATCGCCCGGGCGCTGCTCACCAATCCCGAGGTGCTGATCCTGGACGACGCCCTTTCCGCGGTGGATACCAAGACCGAGCGGCAGATCCTGGAACGCTTGATCGAGCTTCGCAAGGGACGCACCACCATCATCATCGCCCACCGTATCTCATCGATCCAGCACGCCGACCATATCATCGTGCTGGGCGAAGGCAAGATCGTGGAACGCGGCTCGCACGCGGAATTGCTGGCCCTCGGCGGCCTCTACAAGGGGCTCTATGAGAAGCAAAGGATCCGCGCCAGGCTGGAAGGGGAGGAAGAATGA
36357	c_000000009424	1568	3698	f	ABC transporter transmembrane region	PF00664	ATGAACTTCGGTGGCGGCGGCGGACGCGGACGGGGCGGCTTCTCGGAAGACGAGCTGAAAGGCAAAATCTACGACAAACGCCTCTATGGCAAGTTGCTCTTGTATCTCAAACCCTATCTGTTTTGGGTGGTGGTATCCTTTCTGATCCTGATGGTGGTGGCGGCGGCTGAACTTATCCAACCCCTCATCCAGCGCAGCGCGATCGACGACCATATAGTCTCGGACAAACTGATCGCGGTCTTCGACCTGGAAGCGGAGATAGACGCTTTCCAGGCCAAGTATAAGATTCTCAAACTCAAGAAATATGCACAAAACGGGAAGTATTTTCTGATCTTCAGCGCCAACGACCAGAATAAGATCAACCGGACTGACCTTAAAGATTTGCAGGATAAAGGCATA…
36757	c_000000009529	2	188	r			ATGGCAGCCCTGGCGGAGGAATTGAACAGATTTGGCGTGTTCGTCCATCTGCGCAGCGACAGGCCAAAACACTTGTTTGGCAACCTGAATCCAAATCTATCCTCGGTTGAGGATGTGAGCATGGATTTCGGGGTTCGCCAGTATCCCAACCTGGACTGCGATATAGAGAGAACGAAAAGCGAACTT
36758	c_000000009529	253	619	r	NusG domain II	PF07009	ATGCTGAAATTGATCCGGGAAAACCTAAGCCTGGCAGATGTGATGCTTTTCATCATCATTGTGATCGTTGTCGTTTTGACATCCTACGGGATGCTGCGGAAAAGGGAAAACCGCAGAGTCTATATCATCAAAGAAAACCGCTATTGGGCGGATTATCCGCTTTCGCAAGACCGGACAATTGTGATTGACGAACACAACACACTGCAGATCAATAACGGAAAAGTGAGAATGTTGAAAGCTGATTGTCCAGACCAACGCTGCGTAAAACAAGGTGCCAGCGATTTGTTGCCGATAATCTGTCTGCCTAACCGCTTGGTGGTGGAGATCAGATCCACAAACCAGAAAAGAACATTGATTATCCAGTAA
36759	c_000000009529	618	1611	r	Radical SAM superfamily	PF04055	ATGGATCAGCTAAGAGAAGCAATGTTCTACCGCAAAGTGGGGGAGAGCGGGGTGGTTTGCGATCTCTGCCCACATCACTGTAACCTTAAAACAGGACAATCTGGTAAATGCAGAGGGAGAGAAAGCCAGGGTGGCAAGTTGATTGCCGTCAACTATGGAAAGCACATGGGTCTGGGAGTTGATCCCATCGAGAAAAAACCCCTGTATCACTTTCGACCCGGTTCTAAGATTATCTCTCTGGGAGCAAACTCCTGTAACCTGAGTTGCTTCTTCTGCCAGAATTATGGAACCAGCCAATTCAAGTGCAACACCGAATATTTGAGTCCCCAAGAACTGTATGGACTGGTTCGGCAATTTTGCGAACAGCAAGCAATGCAAGTTGCGTTTACATACACTGAA…
36760	c_000000009529	1598	2825	r	3-Deoxy-D-manno-octulosonic-acid transferase (kdotransferase)	PF04413	ATGGCTGCCATCATCTTTGGTCTATATAATTTGATATTGGAAACAGCATTTTTGCTATTCTATCCGCTAATCTGGTTGATTTGCCTGGGGAAGCATTACACAGATTCCCTCAAACCCCAGGGCAGCAACAGCGAGGGGGGAATATTGCTGCATGCCGCTTCAGTGGGTGAGGTCAACGCCGTCAAACCATTGCTGGTGTCTCTGAAGCAGAAGTATCCGGATAAAAAGATTGTAATCACCACAAACACGGTTACAGGTTTAAAAGCGGCAAAGGCGATACACCCACAATCATTTCTGGCAGTGATGGATATCAGGCATTTGCGGAGAAAGCAACTTGCGATAGTAAATCCCAGTTTGATCATTATCATGGAGACCGAGATTTGGCCCAATCTCTTGCAT…
36761	c_000000009529	2876	3116	f			ATGGCGGGAGCGACGAGACTCGAACTCGCGGCCTTCTGCGTGACAGGCAGACGTTCTAACCAAACTGAACTACGCCCCCGGCGCTGTTCTATGTTCAAAGTAAGTTTACAAACTTTAAGCAGGGCTGTTTCTGTCAAGGGAAAACATTCTCCGATCCTAAAATTAATCGCCCGATTGCAGCCATCAGAATATAATCTATTCATGGTCAAGATCGATAATCTCATGCTCTGTGTTTCCTAA
36808	c_000000009544	0	225	f	Protein of unknown function (DUF975)	PF06161	CCCCATATCTCCGCCACCGAGGCCATGCTCCAGAGCAAGGAAATGATGCGGGGGCACAAAACTGAATACTTCTGGCTGATGCTCTCTTTCATCGGCTGGTTCATCCTCAGCATCTTTACCCTGGGGCTGGGATTCTTCTTTCTGTCTTCTTACACCACCATGGCTTCGGCAATCTTTTACCGCCGACTGAAGGGAGACATCCCAACTGTCGCTACCATAGAATAG
36809	c_000000009544	296	809	f	Putative modulator of DNA gyrase	PF01523	ATGCGTTTTCCCGATCTTGCCATGAACGCGGCTCAGAGCCTGGGCGCCGAATATGCCGACATCCGCGTTCAGAAAACCACCGACCAGGTGATCTTCCTGCGCAATCTGAGCCTGAAGAACACCAGCACCAACGTGCTTAACGGCTACGGCGTGAGGTTTTTCAAAGACGGAGCCTGGGGCTTTGCCCACTCCAATGTTTTCACCGACGAGGCCGTGTTGGCCACAGTCAAACGGGCCGCGGAAATAGCCGTCCTTTCCGCTTCTGTAAACAAAGCCAAAAAGCTTCGCCTGGCTCCCGAGCGCGGCTATATCGCCAAGTATGAGACCCCCGTGCGTATCGATCCCCAGAGCGTGCCCCTGAAGGAAAAGATCGAGCTGATGCTGGAGGTCAACCGCGCC…
36810	c_000000009544	814	1738	f	Putative modulator of DNA gyrase	PF01523	ATGCTGGCGGCCACTGCTGTGTGGGAAGGCGACAGCCAGAGCCGCAGCTTCAACGAGGGCGGAAAGGCCGTGGGCTGGGAATGGATACTGGAGCTGAACCTGGTGGAAAAGGCCAAACAGATCGCCGAGGAAGCTCTGATCAAGGTCAAAGCCGACACCCTGGGACCGGAAACCAGGCGCAGCCTGATCCTCGACCCCATCCACCTGGGACTGACCATGCACGAAAGCGTGGGACACCCCACCGAGCTTGACCGCGTGTTGGGCTGGGAGGCGGACTATGCCGGCATCTCCTTCGCGACCCCGGAAAAGCTGAAAACCTACCAGTATGGCAGCGAGATTGTCAACTTCATGGGCGACAACACGCTGGAGCAGGGATTGGCGACCCTGGGCTTTGACGAC…
36811	c_000000009544	1734	1965	f			ATGAACAAGAATTTTGAGCTTATATCCGACTATATCAAAAAACACTGCCAGGCAGACGACTATGTGCTGAGAGTGAACAGTTCTGACAGCCATGAGACCCGTTTTGCCCAAAACAGGGTGACCCAGCATATCGCAGGAGCCAATCTGAGTGTTGATTTGACCGTTTCCTTTGGGGAGAAAAGCGGTTCCTGCTCCGTCAACCAGGGCGATCCGGAGAGCTGGATTACCTGA
36812	c_000000009544	2092	2530	f	Putative modulator of DNA gyrase	PF01523	ATGGTGGAGATCGTCCAGCAGGCCATCGACAAGGCCACCGCCTATGGAGCAAGCGTTGCGGGTATGACGGAAAAACATTACTGGGAAACGCTGTTGAACACCAAAAACGGCTTTGTGGGCACGGACTCCGCCACTGAATTCGGCCATTCCATGACCCTCAAGAAAGACAATGTGGAGACCAAGGTTTCGTATTCCGCCAAGGATATGAAAGGCTTTTCCCTCGAAGGCGAGTTCGCGCAGCTCGCGTCCCAGGCCGAGAGCCTCAAGACCATGAAAGACTTCGATCCCTGCAAGATCGCCGTGATCCTGCGTCCCAGCGCGTTGGAAGAGCTGCTCTGGTTCATGGGCTGGATGATGAACCGCCGCCAAAGCGATGAAGGCCTCACGCCTTTCAGCGGC…
36813	c_000000009544	2676	3021	f			ATGAGCGCCTACAACGCCTATATGCCCGGCGCCCACGCCAGCGAGGAAGAGATGATGCAGATGGTGCCCCGCGGGCTGATCATCAACCGCTTCTGGTATATCCGCACCGTTGACGCCAAAACCGGAGAACTGACCGGCATGACCCGCGACGGAGTGTTGTATTTCGAGGACGGCAAGGTTCGCAACGCGGTCAATAATCTGCGGTTCAACGAGATACCTCACCTTGCCACACGCCGCATCGTCGCCATGGGGGAATCCGGGCTGGCATCCCTGCATAGCTGCCTGCCCACCACCCTCATCGATGGGTTCACTTTTTGTGGACAAGACGAGTTTTTAAAAAAATGA
36814	c_000000009544	3153	3330	f	Probable zinc-ribbon domain	PF13451	ATGCCGGATAAGACATTGGTTTGCAAGGATTGCTCAAAAGAATTCGTGTTCAGCGAAGGCGAACAGGAATTTTACAAGGAAAAGGGTTTGCAAAACGAGCCCCAGCGCTGCCCTGAATGCCGCAAGGCCAAAAAGGCCGAGTACAACCGCAACAGATTCCAGCGCCGTTCCGAATAA
37232	c_000000009651	151	541	f	Pantoate-beta-alanine ligase	PF02569	GTGGTGGTATTGGAAACCATGCTGAGAGACCTGAATTCGGATACGCAAATATTCCGTTGCCCGATAGTGCGCGAAAGCGACGGTCTGGCAATGAGCTCCCGCAACATGTATTTAAGCCCCGAAGAGAGAGCCAAAGCCCTGTGCCTTTCTCAAACCCTGGATATGGGCAGGCAAATGGTGGCATCAGGAAAAAAGCGCGCCGAGGAAGTGATTCTGGCTGCCGAGGACAAGATAAATGCGGCTGGCGGAAAGATAGATTACATCAGTCTGGTAAACGGATCAACCCTGCAGCCGCAAGATATGATCGATCAGGATACCCGAATGCTGCTTGCCGTCTATATTGGCAACACCCGTTTAATCGACAATTGCAGCTTGATGCAATCTGATTAG
37233	c_000000009651	834	1965	f	Bacterial trigger factor protein (TF)	PF05697	TTGCAGATGTTAGAAAGATTGCATGGCGAAAGGATCAAGGATTACTTCGAAAAAGACTTTATTGATGAGGTCTTCGACGAGGCAGCCAAGGAGCATGAAATCCATTACCTGCTGTTTCCCGAAGTGAAAGAAGTAGCCTGGGAACGTGGCAACGACATGCAGATCACCTTGGAAATAGAACATGAACCCGCGGTGGAATTCAAACAACTGGAAGGCTTGCAGGTTCCTTTCAAGCCAACCCTTTTAGATGAGCAAGTGGAATTGTTTGTTGAGAATCTGGCCAAAGAACATACCACCGCCCAAGACGCTGATGTGGCGGAAAAAGATGATCAGTTGGACATCGAGCTTGCCATGGAGCTGAATGGCAGCCCCTATACCAATAACGTTACAATGTATGCC…
37234	c_000000009651	1967	2330	f	Clp protease	PF00574	ATGAACTACATACCCATGGTTATCGAACAGGTTGGACGCACCGAAAGAGCTTACGACATCTATTCGCGTCTGCTAAAAGACAGAATCGTGTTTGTGAGTGGAGTGATAGAAGACAATCTGGCCAACTCAGTTGTAGCCCAGTTGCTGCACTTGGAAGGCGAGGATGCCGAGCGGGATATCTATATGTATATCAACAGCCCCGGAGGGGTAATCTCATCAGGCTTGGCGATATATGACACCATGCAATACATCAAGCCCAATGTGTGCACCATCTGCATCGGCCAGGCTGCCAGCATGGCGGCTCTGCTATTGGCTGCAGGACATCCCGGAAAGCGCACTGCTCTCCCCAACAGCCGATCATGA
37235	c_000000009651	2326	2551	f	Clp protease	PF00574	ATGATCCACCAACCCTTGGGTGGCGCGCAGGGACAGGCCAGCGACATAGCTATTCAGGCCAAGGAAATCCTCTACCTGCGCGAGAAAATGAACGAAATCCTGCACAATCATACGGGACAGGATCTGAAGAAATTGATTGAGGACACCGACCGCAACTATTTCATGTCTGCCGAAGAGGCTAAAAACTACGGCATCATAGATGAAGTAATTATTAACAGGAAATAG
37236	c_000000009651	2624	3881	f	AAA domain (Cdc48 subfamily)	PF07724	TTGGATAAATACAAGAACCAGAGTTGCTCTTTCTGCGGACGCAATGAAGACGAGGTGAAAACCCTGATCAGGGGCATTGCGGGCAATATCTGCGATGAATGCATCGCGATGTGCCATAACATCATTGAGTCCAATACCGAGATTCCCGAGGAAGAGCAGATCGACCTGCCCAAGCCAAGTGTCATAAAGTCCTATCTGGATCAGTATGTCATTGGGCAGGATCACGCCAAAATGATAATCTCTGTAGCAGTCTATAATCACTATAAAAGAATCTTTCGCCAGACAACGGATGACAATATCGAGCTGGAAAAAAGCAATATTCTGATGGTTGGCCCCACTGGCTGCGGCAAGACCCTGATAGCCCAGACCCTGGCTACTTTCCTCAAGGTGCCTTTCGCG…
37237	c_000000009651	3887	4427	f			ATGCGCAGATTGTTGATCCTGATGCTTGTTTTATTGGGTGGATGCTCAGTCCTGCTACAGCAGAGCGAAGGCGAGCTAAGGATCAGAAACCGCACCAATTCCGACATCTGGATCAGCGTTTCAGATTCTGAACCAAAGCATCTGGAGTCGCTCTCCACCTGGTCAAAATACTATACATCGTACGAAGTGGAAAACCTTTCCTATACAGGCAATCTCGTGTTTCCCAACAAGGCGAGCATCAACATCAGGCCTGGCCTTGTAAGCTCCTTTGACATCCAGTCTGACGGCGGAGCATTACAACTGATAAATACAGGCACCGCGACAATTATCGAGGTATATCTGTCCAGTTCAGATGAAAGCAACTGGGGGATGAACGACTTGGGTGGCACAATCGAGCCC…
37338	c_000000009685	0	144	r			ATGCAATTTGCCCAACATCGGAGCCAGCAAGAGCAGCCCCATCTGGGAGAGGATGCCCTTGGCCAGGAAGTTGTTTGTGTAGCTGAGTTGCAGCTTATCCACCAGATAGATGGGGATGATGGGCTGCATCATGATAAAACCCAT
37339	c_000000009685	322	568	f			ATGGGCTCGATCTTCTTTGCCGGGGAAAGGGATGCCTCCATCTATCAGAGCCTGCATGTGACCCTCACCGGTGTGCGCGGTCTGATCGCCCCGGTTCTGGGTTACGCGATGCTCAAGATCTTCAGCCTCACGGCAGTGTTCGTGGTGGCGGCGGGTTTCTTTTTGGTGGCATCCTTGGTCAGTTACCGGGATTACCGCAAGGTGCGCAAGGAGCTGCGGACGGTTCCCCGCGACTGGCAGAGATGA
37340	c_000000009685	760	1051	f	Bacterial DNA-binding protein	PF00216	ATGACTAAAGCAGATCTGGTAAAAATCGTATCCGAAAATACCGGAATCATCCGCAAAGACGTTGCTGTTGTCGTGGACGCCCTGCTGCAATCCATCAAGGACAGCCTGGGCAGTGGCCACCACATCGAAATACGCGGCTTTGGCACCTTCAAGCTCAAAACCAGAAAACCGCGTGTGGGCCGTAACCCCAAGACCGACGAGAAAGTACCCGTTCCCGCCAGGACAGTTCCCACCTTTAAGTTTTCCCGCGAATTCAAGACTTCAGTGATGGATCTGAAGATCGAACCCTAA
37341	c_000000009685	1446	2301	f	RNase_H superfamily	PF13482	TTGCCCCTCTATCCGGACGAGCTGCCGGCTGTTTTTCTGCGCTGGGCTGGCTTGGAGAGCGGTGCCTCATGGGTGCCGGAAGACTTTCTGGTGCTCGATCTGGAGACCACGGGACTGGGCCGCGGCCAAACAATCGCCTTCCTGATCGGCCTGGGCTATTGGGAGCGGGGACGTTTTACGGTGGAGCAGATTTTCCTGCCGGAACCGGAGGCGGAAGCCAATTCTTTCGACCGCCTGATCGAGCTGCTGGAAACAAGGTCGGTGTTCATCACCTTCAACGGCAAGACCTTCGATATCCCGGTGCTGGAATCGCGCATCCTCTACAACCATCTCTGGATCGACCTGCGTTCCCCCTGGCATATCGACCTGCTGCACATCGCCCGCCGCCTGTGGAAAAAG…
37342	c_000000009685	2308	2461	f			ATGGCGCTGGAGAAGGCGAAGGACTTTGACCAGGCCCTGTTCTTCAGCCAGAAATTGCTGGCCTGGCATTTGAGCAGAGAGGTGGTGAAAGACAATAAGGTGCGGGACTTGCAGAAGCGGATTGCCCGCCTGCGGAAAAAGCTGATGAACTGA
37988	c_000000009867	1	442	f			AAATCTGCTGAATACAATACTGACCTGATAGTGCCCTGCCGTTTTTCCATGGTGCTCTCCGCGGCACGTGAAACGGTTAAGGAAGCGTATTTAAGAGCGGGCAAACCAGACCAGTATCGTGAGGAAAATATCTTCTACGTTACGGACGACCAGTTTGGCTTTGTGGCTGGCGTGGATGGCATCATGGTGCGCGAACAACCGGCGGCGAACTTCTTCCTGGGAGCTTTCTGGGCAGAGTCGCTGATCCTCACCGAAACAGGTTTCGGAACCGGCGCCATTCAGACCGCTGGCACTGGCCAGCCCCATCAGATCCCTTTCTTTGTGGTTTCCTGCGACTACACTCTGATCGGTGAAGAGCTCTTCGCTGCTTCGGCTTACCTCTCCCGGATCCCCATCAGT…
37989	c_000000009867	523	1222	f			ATGAAACGCAACGTACCTTTGGTCCTGGCCTTCATCAGTGGAATGTTGGTTATTATCTCAGAGTTTATACCGCACTATCCATTCGGTTTGATAGAAGAGACCCTTACAGGCTGGTTTATGATCGTCTCCAGCTTTGCAATCCTGCTGGGCCAGATCAGTCTGATCTCGGCTAACATCAACCGGGTTGCTGAGAAAAGCCAGAACTGGCAGTACTACTTGGCTGGCCTTATCAGTTTTGCCGTGATGGTGACAGTTGGCCTGCTCTGGGGAATGGAAAACACGCCTGGCATCCTGGGTCAGGGAGCAGGCATAACTGCCAAACTGGGCAGCAAACCATTCGACTATATCTTCGAATATGCCTATATGCCTCTTTCGTCCACCATGTTTGCCCTGCTGGCA…
37990	c_000000009867	1218	2070	f			ATGACCTCCAAAGAAAGAACAGTATTGGAACGCAGGATCGTTTTTCTTGTCTTGGCCATTGCCGTAGCATTGCCACTTGTCTTTCCGCTGGGATTGAAAACACAGGTTACGCCTCTTACTGAAAAGGCTTACGATCTGGTGGAATCGGCACCCTCAGGCTCCGTGGTGTTGCTCTCTTTCGATTACGACCCCTCCACGGTCACAGAGCTTCAGCCGATGGCGAAAGCTGTGATCGAACACGCATGGAAAAAGGGACACCGGATCATAGCGACTGCCATGTGGCCTCAGGGCTCTCAGATGGCGGATATGGCCTTTGCGGATGTTCAGAAAAAGTTTGATAACAGCAAAGAATATGGTTTGGATTACATTAATTTGGGTTACAAGGTCGGAGGCATGGTC…
37991	c_000000009867	2225	2702	f			TTGGTGCCCAATCTGATAACCAAACTGTTCTTCGATTTTGGCAACAACATAATCCTGCTGGTGCCATTGGCTTTGGGCATCATGATGCTCTTCCGGATTATTCCATCTACGCAGTGGGTCAGCCGCTATCCCATAGCAATCGTGGTCGGTACCTCCGCTGCCATAGCGATGCTGCGTACCATGCAGACCAATCTGCTCACCCAAGTCACAGCCACCATGGTCAACCCCTTCCAGTTTTCTTCGCCAGTGGCGATTGTGGGAACCATTCTGGTGATTCTGGGTACCATCTGCGGCATCTATTTCTTCTATTTCAGTAGAAAGCAGGAGGGAATATACGCCGTTCCTTCCAAAATCGGCATTTGGTTTTTAATGATCAGTTTCGGAGCCTCATTCGGCTAT…
37992	c_000000009867	2716	3037	f	AMP-binding enzyme	PF00501	ATGTTGCAGCTACATCAACGCTTCATTCAGGTCGCGAAAAAGACTCCGGACAACATTGCCGTTTACGACAAAGCCACCGGCAAAGATTACACCTATGGCAGGCTGTTGATCGCTTCCCTGATCCTCAAAGAGCATCTCGGCAAGATCAAAAGCAGATACATTGGCATCCTGCTGCCCACCTCGGTTGGCTGCATGCTGGGAATACTTGGCTCCCTGATGAGCGGCAAGATTCCGGTGATGATCAACTATTCCACCGGCGCGATAGAAAAACTGCCGTTACGCCAGGGAAAAATGTGGCTTCAAGACCATCCTGACCAGTAA
37993	c_000000009867	3324	4263	f	AMP-binding enzyme	PF00501	GTGTTCATGTGCATGTTGCCACTTTTCCACGTTTTTGGCCTTACCACCAATTTCTGGCTACCCCTCTTGTTGGGTTCTTCCCTGATTGCCCATCCCAATCCCCTGGAGTTTAAGAGGATCAGCGACCTGGCACGTCAATACCGGATCACTTTTATGACGGCGACACCCTCTTTCTTCTATGGATATTTAAAAAAATCTGCCCCTGGTGACTTTGCCAGCATCAGATTCGCCATCGCTGGGGCTGATAGGCTGCCGGAAAAGGTCTGCGAAGGCTTTGAGAAGAAACACAACATTACTATCTATGAAGGATATGGCACCACGGAGACCTCCCCCGTTATCTCCACCAACTATCCTGGTGTTTACAAACCCGGCAGCGTCGGGAAGCCCATCCCAGGCGTT…
37994	c_000000009867	4237	4822	f	Class II Aldolase and Adducin N-terminal domain	PF00596	ATGAAAAAGAACGAAAACATAAATAGCCTGCAGGCGCTGGCGGAGCAATCCGCAGAAATGAAAAACCTGCTGGTCAGGATTTCCGCCGTGGCAGCCCAGATCAACCTGCATGGCTGGGCTGAGGCAAACGCGGGCAACATCTCCGTGGATGTGAGTTCTCTGCTTGGCAGCGAACAAGGGGCAAGCAAGGACTGGTACCTTGTATCCCGCTCGGGCAGCCGCTATCGCGATCTGGCTGCCGATCCGCTCTCCGTTCTATTGCTCATTTCACCCTCAGAACCCGCACGGGGGGATGGCTCGCCAAGCTCGGAATGGGGCTGCCATCTCAAACTGCAGCAGGCGGCGCGGAGCAGAGCTTGCGGCAGTAAAGTGGTGTTGCATGCCCATCCTGACGAGATC…
37995	c_000000009867	4984	6172	f	Sel1 repeat	PF08238	ATGTCCAAATATTCAGCCATTATAATTTTCCTGGCAATAGCGACACTGCTGACGGGCCAGGTAAAATACTCCGACAGCTTGTTGCGAACGGCTCAAAACGGCGATCCTGAAGCTCAGTTTCAGATAGGGGTCTGCTTTCAGGATGGCCTGGGAGTCAAGGCCAATAAAGCTGAAGCCGTGGCTTGGTATTCCAAAGCAAGCGCCAAAGGTCATCCGGGCGCCCAACACAATCTCGCTTACTGCTATTATGTAGGGGATGGAGTGGCTGTTGATAAAAAAGAAGCTATCAGATTGTACCGACTGGCAGCAAATCAAGGCCTCAGCGCCGCGCAATACAGCCTGGGACTTGCCTATTATTCTGGCGATGGCCTCAACCACAACCCCGGCGAAGCAGTAAAG…
37996	c_000000009867	6410	6506	f			GTGAGAACACACTTATCGCTACTCTTGCTGTTGGGGGTACTGCTTACCCCACTGTTTGCCATCAACGATATGTCGGTGATTGCGGAATTTCAGGGT
38386	c_000000009972	219	429	f	Ribosomal L18 of archaea, bacteria, mitoch. and chloroplast	PF00861	TTGGTTTCATATTCCACCAAGGCCAAGGACGCGGAGATCGCTCCCGGCACAAAGAAGGTGGAGCAAAGCTTCCAGATCGGCCAAAAGCTTGGCGAAAAAGCTTTGGCCAACGGTATCACCAAAGTTGCCTTTGACCGGGCCGGTTTCAAATATCACGGCCGGGTGAAAGCTTTGGCCGAAGGCGCCCGCAAAGCCGGACTTGAATTTTAA
38387	c_000000009972	441	963	f	Ribosomal protein S5, C-terminal domain	PF03719	TTGAATCACGAACGCACTCACAATACAGAAGAAGAAAAATACATAGAGAAGATCATCGAGACCAAGCGCGTGGCCAAAGTGGTGAAAGGCGGCCGTAACTTTAGTTTCAGCGCCATAGTCGTCATGGGAGACCGTGAAGGAAACATCGGCGTGGGAAACGGCAAAGCCAACGAAATCGTGGATGCCATCCGCAAAGCTAAAGACAAGGCACTCAAGAACATGTTCAAGGTTCCGATCATCAAGGGAACCATCCCTCATGAGGTCATGGCCCGTTATGGAGCCAGCCGCGTGATGATGAAACCTGCCGCCGCCGGTACCGGTGTCATCGCAGGAGGCACAACCCGCGCGATCTTTGAAGCAGCCGGGATCGAAAACATCCTCTGCAAATCCCTGGGTTCA…
38388	c_000000009972	959	1145	f	Ribosomal protein L30p/L7e	PF00327	ATGAAGATCAAGGTTACCCAGATACGCAGCACCATCAATCGCAAGGAAAACCATAAAAGAGTGATCAAGTCCCTGGGGCTTGGCCATCCTGGCAAGAGCCGCGTGCATGAAGACACACCCAGCATTCGCGGCATGATAAAAAAAGTATCCTACATGGTTCACGTTGAAGACGTGCAGGGAGAGTAA
38389	c_000000009972	1147	1603	f	Ribosomal proteins 50S-L15, 50S-L18e, 60S-L27A	PF00828	ATGCTGAATCTATCGAATCTTAGCAAACCTGCAGGCAGAAAAGCCAAAAAACGCCTGGGAAAAGGTGAAGGTTCCGGCTACGGACAACAGTCCGGACGCGGACACAAGGGTAAGAAAGCCAGATCTGGCGGAAATGTTTCCCCCGGATTTGAAGGCGGTCAGATGCCCATACAACGCCGTCTGCCCAAACGCGGTTTCAAAAACCCATTCCGTGTTAACTATCGCATCCTCAATCTCTCACGTTTGGCACATCTCGAAGAGAATGAATTCGATATTGCCAAGCTGGAAATCATGGGACTGCTGCCTTCCAAGGGCAAAAAAGCCTCCTATCCGGTTAAAGTCCTGGCCAGTGTCACAGAGGATTTCACCAAAACCGTTCACATCAAAGCCAACGCCTTT…
38390	c_000000009972	1604	2048	f	SecY translocase	PF00344	TTGTTTAAAACTATCTTGAATATATTCCGGATCCCGGACCTTAGGAACAAGATTCTGTTCACAGCCTTGTTTTTGATCCTCTACCGCTTGGGAAGCTTTGTCCCAATCCCCGGTGTGGATGCCGGCCAGCTTAAGTCATTCTTCGAGACACGTAGCGACAACACCCTCTTCGGGTTGCTCAACCTGTTTGTGGGTGGAAACTTTGAAAGGGCGTCTGTCTTTGCCCTGGGAATTATGCCCTATATCACGGCCTCGATCGTGATCCAGCTTTTGGGCAGCATAGTTCCCTATTTTGAAAAGCTGCGCAAAGAAGGTGCGGACGGGCAGAAGAAGATTAACCAGATTACCCGCTATGGCACTGTGCTGCTGGCTGCCTTCAACGCTGTGACCATCACGGTG…
38391	c_000000009972	2205	2766	f	SecY translocase	PF00344	GTGCGTATGTTTCAGGTTCAGACAGGTATCCGCAGCGTATTGGTGTCTTTGATAGCCGTGGCAGTCATGGTGATCGTGACGGCTGCCGTGATCTTTGTGACCGAAGCCATCCGCAAGATACCTGTGCAATATGCCAAGCGCATTGTGGGACGCCGTGTTTATGGCGGGCAAAGCACCTATATTCCCCTGCGGGTCAACACCGCCGGTGTGATTCCCATCATCTTTGCCCAGTCCATACTAATGTTTCCCGCCACCCTGATCACCATCATTGGCGGCGGCACACAACCCAGCGGCTTCCTGAACACCCTGCTGAAGTGGTTTAGTCCCGGACATGGCGTTTACACTGTGATCTATGTGGCCATGATCATCTTCTTTGCCTATTTCTACACCTCTATCGTG…
38392	c_000000009972	2762	2927	f			ATGATGGTCAAGATCTTCAACCTGCCTTTCTATTTTGGTGGAACTGGACTTATCATCGTGGTCGGCGTTGCCCTTGACACTCTGCAACAGATCGAATCCCACCTGGTGATGCGCCACTACGACGGTTTCATGAAAAAAGGCAAACTACACGGCCGCTCAAGTTAA
38393	c_000000009972	2928	3219	f	Metallopeptidase family M24	PF00557	ATGATATTCATTAAGTCTCCTTCCGAAATTGACAAGATACGCGCCAGTTGCCGCATCATCGGTGAGCTGTTGGATGCCCTTGGCTCCAAGGTAGTTCCCGGTGTCAGCACCTTAGAGCTGGACGCCTTCGCGGAGGACTTTATCCTCTCCCGCGGCGGACGGCCTGCTTTCAAGGGCTACACGGTGCCTGGCCTGAAACCTTTTCCGGGAACGCTCTGCACCTCCCTCAATTCCGGGATCGTGCATGGAATCCCTCCCGGGAAGCGGTCTTGCGCGAAGGAGATATCATAG
38394	c_000000009972	3197	3686	f	Metallopeptidase family M24	PF00557	TTGCGCGAAGGAGATATCATAGGTATCGATGTTGGCGTTGTGAAGGACGGTTACTATGGCGATGCCGCCCGCAGCTACGCGGTCGGGAAGATCTCTGCTGACGCGGAGAATCTGCTTGACGTGACCCGGAAATCTCTACAATTAGGGATTTCCGCCGCTCTGCCGGGCAACCGGGTGGGCGACGTCTCCCACGCCATCGGTTCATACGTTGGCCGGATGGGATATTATGTTGCCGACAACCTTACGGGACACGGGGTTGGCCGGGCTTTGCATGAAGAACCCATGATACCCAACAGCGGCACAGCAGGCCGTGGCCCCCGTTTGAAAGCAGGCATGACACTGGCCATCGAACCCATGGTCAATATCGGTACAAACCGTGTGAGGGAATCCGGCTGGGAG…
38395	c_000000009972	3698	3917	f	Translation initiation factor 1A / IF-1	PF01176	ATGAGTAAATCCGGCGTGATTGAGGTGGAAGGGCTCGTCACTGAAGCACTTCCAAACACGACTTTCCGCGTTCAGCTGGAAAACGGCCACGAAATCCTGGCCCACAGTTCCGGCAAAATGCGCATGAACTATATCAGAATTCTGCCCGGAGACAAGGTCAAGGTCGAGCTTTCTCCCTACGACCTTACCCGCGGCAGGATTACATACCGCTATAAATAA
38396	c_000000009972	4096	4456	f	Ribosomal protein S13/S18	PF00416	TTGCAGGTATTGAAATTCCCAAAAACAAAACGCCTGTTCATTGGTCTGACCTACATTTACGGTATCGGCTTGACTACTGCCAAAAAGATCTGCCAGAAAGCCAATATCGACGAAATGAAAAAGGTGGAAGATCTTACAGTGGAAGAGGAAAAAACCATCCGCGACATCGTCCAGAACGACTATGTGGTGGAAGGAGCCCTTCGCACCCAGGTTGCCATGAGTATCAAACGCCTTATGGAAATCGGCAGCTATCGCGGTATGCGCCACAGACGCGGACTTCCGGTCCGTGGACAGCGCACCCACACCAATGCCCGCACCCGCAAGGGACCCCGCGCCGGCGCCATTAAAAAGAAGAAATAG
38397	c_000000009972	4467	4857	f	Ribosomal protein S11	PF00411	ATGGCAAAGAAAACCAGAACCAAGAAAAAACGCGTCCGTCTTGCCTTTGACGAGGGAATCGTATTTGTGCACTCCAGCTTCAACAATACCATCGTTTCCCTCGCCGACCGCGCAGGCAACGTCCTGGCCTGGTCCAGTGGCGGAAAGATTGGCAACAAAGGCTCCCGCAAGGCCACTCCCTATGCCGCCCAAATGGCCGCCACCGAAGTGGCAAAAGCAGGCCTGGAAATGGGAATTACCCGCGTGAGCGTGATTGTGAAAGGTCCCGGCGGAGGAAGAGAATCCACCATCCGCGCGGTCAACGCGGCCGGAATCAAAGTGACCATGATCAAGGACGCCACCCCGCTCCCACACAATGGTTGCCGTCCACCCAAAACCAGAAGGATATAA
[truncated: 216 more rows]

## Sheet: Bin 2
gene_callers_id	contig	start	stop	direction	Pfam	Pfam (ACCESSION)	dna_sequence
[truncated: 1,606 more rows]

## Sheet: Bin 3
gene_callers_id	contig	start	stop	direction	Pfam	Pfam (ACCESSION)	dna_sequence
[truncated: 1,978 more rows]

[truncated: 40 more sheets: Bin 4, Title, Bin 5, Bin 6, Bin 7, Bin 8, Bin 9, Bin 10, Bin 11, Bin 12, Bin 13, Bin 14, Bin 15, Bin 16, Bin 17, Bin 18, Bin 19, Bin 20, Bin 21, Bin 22 …]
